# Supplementary material for: Transcriptome Phase Distribution Analysis Reveals Diurnal Regulated Biological Processes and Key Pathways in Rice Flag Leaves and Seedling Leaves
Source: PLoS One. 2011 Mar 2;6(3):e17613. doi: 10.1371/journal.pone.0017613 (PMC3047585; doi:10.1371/journal.pone.0017613)
Supplement: File S1 — Raw tables for diurnal probe-sets list. (XLS) [file pone.0017613.s004.xls]

## Sheet: Diurnal-flag-leaf
	biological replicate1														biological replicate2
Probe_ID	FL1-1_Signal	FL1-2_Signal	FL1-3_Signal	FL1-4_Signal	FL1-5_Signal	FL1-6_Signal	FL1-7_Signal	FL1-8_Signal	FL1-9_Signal	FL1-10_Signal	CC-Peak_time	CC-pValues	AR-qvalue		FL2-1_Signal	FL2-2_Signal	FL2-3_Signal	FL2-4_Signal	FL2-5_Signal	FL2-6_Signal	FL2-7_Signal	FL2-8_Signal	FL2-9_Signal	FL2-10_Signal	CC-Peak_time	CC-pValues	AR-qvalue		Cr	Phase		Affymetrix Descriptions	Locus ID	TF family	Annotation		matched AGI	blast E-value	ATH1 Probe Set ID
Os.7947.1.S1_a_at	4445.6	594.4	219.7	342.4	1175.5	3338.5	3785.2	685.9	97.1	347.7	5.6	0.00143	0.00921885		6212.2	347.4	98.8	250.8	790.1	2689.9	4061.1	210	66.4	136.9	6	0.01821	0.0454941		0.966318	5.8		gb:AF323610.1 DB_XREF=gi:13249139 GEN=GLU TID=Os.7947.1 CNT=574 FEA=FLmRNA TIER=FL+Stack STK=256 UG=Os.7947 DEF=Oryza sativa glucanase (GLU) mRNA, complete cds. PROD=glucanase FL=gb:AF323610.1 gb:AK121825.1 gb:AK060867.1 REP_ORG=O. sativa	LOC_Os05g31140		unspliced-genomic lichenase-2 precursor, putative, expressed		AT3G57260	2e-73	251625_at
Os.7947.1.S1_x_at	6637.2	862.5	376.3	449.2	1507.5	4315.1	5135	968.3	131.9	299.7	5.6	0.00257	0.0290696		8371.3	478.8	102.6	436	991.2	3471.9	4972	368.7	81.1	198.2	6	0.02243	0.0426787		0.976411	5.8		gb:AF323610.1 DB_XREF=gi:13249139 GEN=GLU TID=Os.7947.1 CNT=574 FEA=FLmRNA TIER=FL+Stack STK=256 UG=Os.7947 DEF=Oryza sativa glucanase (GLU) mRNA, complete cds. PROD=glucanase FL=gb:AF323610.1 gb:AK121825.1 gb:AK060867.1 REP_ORG=O. sativa	LOC_Os05g31140		unspliced-genomic lichenase-2 precursor, putative, expressed		AT3G57260	2e-73	251625_at
Os.10784.1.S1_at	4281.7	1706	2598.3	3329	8076.2	13064.4	10578.3	834.4	1746.9	6324.8	2.8	0.00659	0.00651133		4580.3	1563.5	1581.1	4440.1	9863.2	15318.2	11629.1	915.8	1501.1	3333.4	3.2	0.00208	0.00246073		0.964623	3		gb:AB112061.1 DB_XREF=gi:31711498 GEN=OsCTTP TID=Os.10784.1 CNT=326 FEA=FLmRNA TIER=FL+Stack STK=138 UG=Os.10784 UG_TITLE=(indica cultivar-group) OsCTTP gene, complete cds DEF=Oryza sativa (indica cultivar-group) OsCTTP gene, complete cds. FL=g	LOC_Os02g26700		unspliced-genomic cation transport protein chaC, putative, expressed		AT4G31290	2e-87	253522_at
Os.12410.1.S1_a_at	21962.3	18303.8	16502.9	10783.8	6976.7	6556.5	15001	31540.1	18373.8	12312.2	12.4	0.01139	0.0114618		25388	25547	24934.2	15973.7	9663.1	7345.5	11977.6	22864.1	15960.7	11562.6	12.8	0.02664	0.00252725		0.742853	12.6		gb:AF017365.1 DB_XREF=gi:2407284 TID=Os.12410.1 CNT=165 FEA=FLmRNA TIER=FL+Stack STK=110 UG=Os.12410 DEF=Oryza sativa metallothionein-like protein mRNA, complete cds. PROD=metallothionein-like protein FL=gb:AB002820.1 gb:AF017365.1 gb:AK104075.1	LOC_Os01g74300		unspliced-genomic metallothionein-like protein type 2, putative, expressed
Os.12410.1.S1_x_at	16316.8	12740.3	13860.2	8743	6413	4460.3	11140.7	19857.4	15121.7	10553.6	12.8	0.0097	0.0080852		15041.5	16734.9	12199.9	8580.9	7834.2	5274.5	8456.1	14221	12193.4	8241.3	12.8	0.01336	0.002731		0.817053	12.8		gb:AF017365.1 DB_XREF=gi:2407284 TID=Os.12410.1 CNT=165 FEA=FLmRNA TIER=FL+Stack STK=110 UG=Os.12410 DEF=Oryza sativa metallothionein-like protein mRNA, complete cds. PROD=metallothionein-like protein FL=gb:AB002820.1 gb:AF017365.1 gb:AK104075.1	LOC_Os01g74300		unspliced-genomic metallothionein-like protein type 2, putative, expressed
Os.12832.1.S1_a_at	19480.8	21874	26886.3	36410.4	32590.2	26681.4	20792.2	22823.7	28083.3	34177.3	21.6	1e-05	0.00148983		17022.1	22759.9	28544.2	33936.2	31918.2	26302.6	20119.7	22232.9	28728.1	32154.4	20.8	2e-05	0.000892706		0.97086	21.2		gb:AF541859.1 DB_XREF=gi:23345286 GEN=HMG1 TID=Os.12832.1 CNT=599 FEA=FLmRNA TIER=FL+Stack STK=84 UG=Os.12832 DEF=Oryza sativa (indica cultivar-group) HMG1 protein (HMG1) mRNA, complete cds. PROD=HMG1 protein FL=gb:AK062226.1 gb:AF541859.1 gb:A	LOC_Os06g51220	HMG	unspliced-genomic DNA-binding protein MNB1B, putative, expressed		AT1G20693	5e-17	256091_at
Os.11037.1.S1_a_at	23688.9	21061.3	21665.5	17154.7	15423.3	13526.4	18019.3	27157	23877.4	17495.6	13.2	0.00936	0.0092143		19319.6	28601.1	24611.5	12011.1	13055	11298.8	16785.9	31133.5	23363	17422.9	13.2	0.00147	0.00454822		0.860554	13.2		gb:D21836.1 DB_XREF=gi:426441 TID=Os.11037.1 CNT=171 FEA=FLmRNA TIER=FL+Stack STK=81 UG=Os.11037 DEF=Oryza sativa (japonica cultivar-group) mRNA for thioredoxin h, complete cds. PROD=thioredoxin h FL=gb:AK059196.1 gb:U92541.1 gb:AK121423.1 gb:D2	LOC_Os07g08840		unspliced-genomic thioredoxin H-type, putative, expressed		AT1G19730	2e-38	261145_at
Os.46383.2.A1_s_at	41811.8	40954.9	31396.2	20020.5	27825.1	27251	38941.1	41092.9	29001.2	23487.6	10	0.00047	0.00365098		50881.9	43182.2	34631.2	25308	33012	27448	40198.7	39246.6	28935.1	25097.9	9.2	0.01634	0.00729917		0.92721	9.6		gb:CB652033 DB_XREF=gi:29655758 DB_XREF=OSJNEc01G14.r CLONE=OSJNEc01G14 TID=Os.46383.2 CNT=25 FEA=EST TIER=Stack STK=9 UG=Os.46383 UG_TITLE=(japonica cultivar-group) cDNA clone:001-134-C05, full insert sequence REP_ORG=O. sativa	LOC_Os02g47020		unspliced-genomic phosphoribulokinase, chloroplast precursor, putative, expressed		AT1G32060	0	255720_at
Os.1316.1.S1_a_at	6993.9	16975.1	27625.7	25101.8	12916.5	10062.6	4687.1	15633.9	26976.1	21632.8	17.6	7e-05	0.00312402		4903.3	17297.9	31196.2	26896.3	14616.2	10536.5	5396.3	14968.4	28212.3	26797.9	18	3e-05	0.00205311		0.985831	17.8		gb:AK121632.1 DB_XREF=gi:37991255 TID=Os.1316.1 CNT=136 FEA=FLmRNA TIER=FL+Stack STK=66 UG=Os.1316 UG_TITLE=(japonica cultivar-group) oryzacystatin (P0003D09.33), mRNA DEF=Oryza sativa (japonica cultivar-group) cDNA clone:J033050G08, full insert	LOC_Os02g04780		unspliced-genomic expressed protein		AT1G16770	2e-82	255761_at
Os.1316.1.S2_at	55.3	25.3	59.2	77.2	20.4	17.7	36.5	79.9	109.3	90.2	16.4	0.0741	0.0367186		55.1	130.1	84.9	98.6	35	2	22.9	142.4	180.5	146.4	15.6	0.00763	0.00349275		0.793866	16		gb:AK105278.1 DB_XREF=gi:32990487 TID=Os.1316.1 CNT=136 FEA=FLmRNA TIER=FL STK=1 UG=Os.1316 UG_TITLE=(japonica cultivar-group) oryzacystatin (P0003D09.33), mRNA DEF=Oryza sativa (japonica cultivar-group) cDNA clone:001-116-B06, full insert sequen	LOC_Os02g04780		unspliced-genomic expressed protein		AT1G16770	2e-82	255761_at
Os.4786.1.S2_at	322.3	613.4	254.8	172.8	118.9	172.2	192.9	327.2	341	295.3	12.8	0.06847	0.0199186		437.3	735	295.7	180.4	213	108.3	224.7	465.8	259.9	242.7	12	0.06852	0.0263231		0.906768	12.4		gb:AK072162.1 DB_XREF=gi:32982185 TID=Os.4786.1 CNT=220 FEA=FLmRNA TIER=FL STK=1 UG=Os.4786 UG_TITLE=O.sativa mRNA for S-adenosylmethionine decarboxylase DEF=Oryza sativa (japonica cultivar-group) cDNA clone:J013129L10, full insert sequence. FL=	LOC_Os04g42090		unspliced-genomic S-adenosylmethionine decarboxylase proenzyme, putative, expressed		AT3G25570	4e-101	257960_at
Os.7805.1.S1_a_at	2014.1	794.7	2843.8	5746.1	4128	2196.9	1803.9	791.8	2025	6866.3	22	0.00442	0.0148934		1126.7	555.8	2129.8	5749.8	3891.9	2037.3	1878.6	811.4	2555.4	4427.8	22	0.00138	0.00748841		0.921025	22		gb:AK068374.1 DB_XREF=gi:32978392 TID=Os.7805.1 CNT=153 FEA=FLmRNA TIER=FL+Stack STK=60 UG=Os.7805 UG_TITLE=(japonica cultivar-group) putative alpha-galactosidase preproprotein (OSJNBa0041P03.8), mRNA DEF=Oryza sativa (japonica cultivar-group) cD	LOC_Os10g35110		unspliced-genomic alpha-galactosidase precursor, putative, expressed		AT5G08370	4e-153	246036_at
Os.28300.1.S1_at	22237.7	20127.7	17856.4	18632	19008	21382.5	22032.3	18398	19753.8	15177.1	6.8	0.01728	0.0124565		23361.8	17682	17553.3	14836.4	19468.1	22758.5	25130.5	16936.6	18482.4	13874.7	6	0.00578	0.00958687		0.893056	6.4		gb:AB111810.1 DB_XREF=gi:39104467 GEN=Hsp90 TID=Os.28300.1 CNT=214 FEA=FLmRNA TIER=FL+Stack STK=52 UG=Os.28300 DEF=Oryza sativa (japonica cultivar-group) Hsp90 mRNA for heat shock protein 90, complete cds. PROD=heat shock protein 90 FL=gb:AK064	LOC_Os09g30412		unspliced-genomic heat shock protein 81-3, putative, expressed		AT5G56030	0	248045_at
Os.12692.1.S1_x_at	1872.2	3147.5	3839.5	3152.1	2429.7	2695.4	1690.1	3011.8	4474	3776.7	17.2	0.0056	0.0104716		1525.4	2657.9	3371.3	3051.5	2295.8	2977.2	1504.6	3686.5	3701.1	2830.9	16.8	0.09548	0.0488048		0.841081	17		gb:AK102194.1 DB_XREF=gi:32987403 TID=Os.12692.1 CNT=270 FEA=FLmRNA TIER=FL+Stack STK=49 UG=Os.12692 UG_TITLE=O.sativa mRNA for alpha-tubulin (clone OSTA-111) DEF=Oryza sativa (japonica cultivar-group) cDNA clone:J033087C05, full insert sequence.	LOC_Os03g51600		unspliced-genomic tubulin alpha-3 chain, putative, expressed		AT1G50010	0	261639_at
Os.37869.2.S1_a_at	22803.3	17395.5	7487	12130.3	16240.4	17835.3	22808.2	11816.2	9164.5	7141.8	6	0.00178	0.00630019		16610.7	10063.5	5091.1	6985.2	10953.1	15575.8	18386.3	9666.9	7534.9	4778.3	6	6e-05	0.00169587		0.945912	6		gb:NM_187913.1 DB_XREF=gi:34902909 TID=Os.37869.2 CNT=1 FEA=mRNA TIER=ConsEnd STK=0 UG=Os.37869 UG_TITLE=(japonica cultivar-group) unnamed protein product (Gene), mRNA DEF=Oryza sativa (japonica cultivar-group) unnamed protein product (Gene), mRN	LOC_Os01g15270		unspliced-genomic expressed protein
Os.4168.1.S1_s_at	13432.7	15415.6	16859.5	21954.3	17847.8	14187.7	11990.3	16681.6	21260.9	19612.4	19.2	0.00147	0.0106056		13129.3	15538.9	21852.6	24102.7	18559.8	13709.7	13775.7	17729.2	23530.7	23392	18.8	1e-05	0.00260125		0.934279	19		gb:D12777.1 DB_XREF=gi:218142 TID=Os.4168.1 CNT=142 FEA=FLmRNA TIER=FL+Stack STK=45 UG=Os.4168 DEF=Oryza sativa (japonica cultivar-group) mRNA for aspartic proteinase, complete cds. PROD=aspartic proteinase FL=gb:D12777.1 gb:AK065206.1 REP_ORG=	LOC_Os05g04630		unspliced-genomic retrotransposon protein, putative, SINE subclass, expressed		AT1G11910	2e-177	264344_at
Os.2447.1.S1_at	4192.9	12906.8	19732.1	16206.6	8519.2	4205.3	1578.9	11822.3	21373.2	16568.8	17.2	2e-05	0.00227481		3704.7	13399.7	23644.7	16941.9	7852.8	4560.3	1419.6	10816.4	20003	17797.1	17.2	6e-05	0.00520999		0.982428	17.2		gb:AF162665.1 DB_XREF=gi:8163729 GEN=Aldh TID=Os.2447.1 CNT=110 FEA=FLmRNA TIER=FL+Stack STK=45 UG=Os.2447 DEF=Oryza sativa aldehyde dehydrogenase (Aldh) mRNA, complete cds; nuclear gene for mitochondrial product. PROD=aldehyde dehydrogenase FL	LOC_Os06g15990		unspliced-genomic aldehyde dehydrogenase, mitochondrial precursor, putative, expressed		AT1G23800	0	265188_at
Os.10139.1.S1_s_at	35747.2	35966	27744.4	24054.7	20966	20169.1	27371.3	37156.2	27324.4	26618.9	12	0.00973	0.00540951		40784.7	31108	30002.7	23886.1	18119.7	16795.6	27865.8	32257.9	25688.5	27613.4	12	0.07589	0.0475493		0.886898	12		gb:U37687.1 DB_XREF=gi:1574943 GEN=Rubq1 TID=Os.10139.1 CNT=221 FEA=FLmRNA TIER=FL+Stack STK=43 UG=Os.10139 DEF=Oryza sativa polyubiquitin (Rubq1) mRNA, complete cds. PROD=polyubiquitin FL=gb:AK121590.1 gb:U37687.1 REP_ORG=O. sativa	LOC_Os06g46770		unspliced-genomic polyubiquitin containing 7 ubiquitin monomers, putative, expressed		AT5G20620	1e-168	245989_s_at
Os.7144.2.S1_a_at	18755.8	19431.9	4110.2	1727.2	5145.3	6899	14246.3	17440.3	4905.3	2081.8	9.2	0.00146	0.00495447		22886.6	17630.8	6556.2	2853.4	6865.8	7078.9	18307.3	19312.5	5953.8	3554	9.2	0.00105	0.00312147		0.972811	9.2		gb:AK103898.1 DB_XREF=gi:32989107 TID=Os.7144.2 CNT=5 FEA=FLmRNA TIER=FL STK=2 UG=Os.7144 UG_TITLE=(japonica cultivar-group) mRNA for orthophosphate dikinase, complete cds DEF=Oryza sativa (japonica cultivar-group) cDNA clone:J033150I16, full ins	LOC_Os05g33570		unspliced-genomic pyruvate, phosphate dikinase, chloroplast precursor, putative, expressed		AT4G15530	0	245528_at
Os.7932.1.S1_at	7026.1	4481.8	6690.4	8570.2	7747.2	7993.7	3712.6	4742.7	6070	7056.9	23.2	0.02446	0.0135656		3963.3	5575	7037.6	7363.4	7019	7078.3	4187.9	3807.1	6425.4	7461.3	21.6	0.00444	0.00440003		0.700686	22.4		gb:AF323586.1 DB_XREF=gi:11995456 GEN=ALDH TID=Os.7932.1 CNT=117 FEA=FLmRNA TIER=FL+Stack STK=41 UG=Os.7932 DEF=Oryza sativa aldehyde dehydrogenase (ALDH) mRNA, complete cds. PROD=aldehyde dehydrogenase FL=gb:AK060757.1 gb:AK120185.1 gb:AF32358	LOC_Os09g26880		unspliced-genomic aldehyde dehydrogenase family 7 member A1, putative, expressed		AT1G54100	0	263157_at
Os.12624.1.S1_s_at	35053.6	36195.2	32009.7	17099.2	4635.8	4163.3	17134.1	30412	31963	18790.4	13.2	0.00198	0.000484892		39561.6	33120.7	34955.3	19600.1	4607.8	4751.3	16727.5	26606.6	28212.3	15085.6	13.2	0.01749	0.00167749		0.967757	13.2		gb:AF058796.1 DB_XREF=gi:3075487 GEN=RCABP69 TID=Os.12624.1 CNT=191 FEA=FLmRNA TIER=FL+Stack STK=40 UG=Os.12624 DEF=Oryza sativa chlorophyll ab-binding protein (RCABP69) mRNA, complete cds. PROD=chlorophyll ab-binding protein FL=gb:AK104619.1 g	LOC_Os07g37240		unspliced-genomic expressed protein		AT5G01530	2e-130	251082_at
Os.4663.1.S2_at	8916.1	11418.6	15618.5	21570.2	22604.3	24931.9	13029.2	10000.5	12592.9	14815.9	0.4	0.01281	0.0164769		6608.9	10358.7	12535.3	14452	21102.5	23235.5	10324.2	7765	11357.3	12809.5	0.8	0.02228	0.00972156		0.950165	0.6		gb:AK119645.1 DB_XREF=gi:37989268 TID=Os.4663.1 CNT=144 FEA=FLmRNA TIER=FL+Stack STK=39 UG=Os.4663 UG_TITLE=(japonica cultivar-group) unnamed protein product (Gene), mRNA DEF=Oryza sativa (japonica cultivar-group) cDNA clone:002-130-G05, full ins	LOC_Os01g04020	AP2-EREBP	unspliced-genomic pathogenesis-related genes transcriptional activator PTI6, putative, expressed		AT1G12980	1e-10
Os.4663.1.S1_at	2213.4	1926.2	3656.2	6992	6503.4	8636.4	2894.2	2096.1	3041	3855.2	0.4	0.01171	0.00532105		1337	2460.9	2989.4	4166.6	6472.2	9623.4	2678.4	2341.6	2830.6	3603.7	1.2	0.04159	0.0170699		0.908541	0.8		gb:AK063183.1 DB_XREF=gi:32973201 TID=Os.4663.1 CNT=144 FEA=FLmRNA TIER=FL STK=1 UG=Os.4663 UG_TITLE=(japonica cultivar-group) unnamed protein product (Gene), mRNA DEF=Oryza sativa (japonica cultivar-group) cDNA clone:001-112-B01, full insert seq	LOC_Os01g04020	AP2-EREBP	unspliced-genomic pathogenesis-related genes transcriptional activator PTI6, putative, expressed		AT1G12980	1e-10
Os.12713.1.S1_at	34868.8	35404.7	33439.4	23497.4	2681.3	1798.7	9937	29425	31119.7	20304.5	14	0.00808	0.00122354		36959.1	27368.3	32157.1	18825.4	1792.9	1996.6	7805.4	23312.7	27970.7	15285.7	13.6	0.03877	0.00925343		0.972044	13.8		gb:AF094776.1 DB_XREF=gi:3789953 GEN=Cab26 TID=Os.12713.1 CNT=170 FEA=FLmRNA TIER=FL+Stack STK=37 UG=Os.12713 DEF=Oryza sativa chlorophyll ab-binding protein precursor (Cab26) mRNA, nuclear gene encoding chloroplast protein, complete cds. PROD=c	LOC_Os01g03320		unspliced-genomic Bowman-Birk type bran trypsin inhibitor precursor, putative, expressed
Os.12223.1.S1_at	8347.7	5793.5	1993.4	845.5	1523.1	4850.5	14352	5001.4	2166.7	860.5	8	0.0066	0.014875		7082.2	3697.4	1611.2	662.9	1282	4430.9	12266	4065.6	1797.9	331.6	7.6	0.00813	0.012744		0.993589	7.8		gb:U82833.1 DB_XREF=gi:1778820 GEN=pOS-SAMS2 TID=Os.12223.1 CNT=155 FEA=FLmRNA TIER=FL+Stack STK=35 UG=Os.12223 DEF=Oryza sativa S-adenosyl-L-methionine synthetase (pOS-SAMS2) mRNA, complete cds. PROD=S-adenosyl-L-methionine synthetase FL=gb:AK	LOC_Os01g22010		unspliced-genomic S-adenosylmethionine synthetase 1, putative, expressed		AT1G02500	0	260913_at
Os.11450.1.S3_a_at	7280.7	13812.4	6238.6	2104.9	4380.1	7096.2	5544.1	10220	5952.5	2125	10.8	0.03118	0.0372042		16056	21323.9	9467.6	3044	7441.2	10704.2	8212.8	15327.4	8511.9	3610.3	10	0.02392	0.0216587		0.959573	10.4		gb:AK068005.1 DB_XREF=gi:32978023 TID=Os.11450.1 CNT=184 FEA=FLmRNA TIER=FL+Stack STK=35 UG=Os.11450 UG_TITLE=(japonica cultivar-group) putative PGPD14 protein (pollen germination related protein) (P0480C01.20), mRNA DEF=Oryza sativa (japonica cu	LOC_Os01g52110		unspliced-genomic RING finger and CHY zinc finger domain-containing protein 1, putative, expressed		AT5G25560	4e-123	246897_at
Os.11450.1.S1_at	3266.2	5274.8	2453.7	1092.1	1958.9	3169	2854.5	4693.5	2160.8	909.6	10	0.01275	0.0254737		6571.6	9853.3	3917.4	982.3	2680.7	3912.5	3023	5957.9	3052.7	1257.6	10.4	0.03875	0.0273034		0.925091	10.2		gb:AK060327.1 DB_XREF=gi:32970345 TID=Os.11450.1 CNT=184 FEA=FLmRNA TIER=FL STK=1 UG=Os.11450 UG_TITLE=(japonica cultivar-group) putative PGPD14 protein (pollen germination related protein) (P0480C01.20), mRNA DEF=Oryza sativa (japonica cultivar-	LOC_Os01g52110		unspliced-genomic RING finger and CHY zinc finger domain-containing protein 1, putative, expressed		AT5G25560	4e-123	246897_at
Os.11450.1.S2_a_at	1829.3	3651	1969.6	576.2	1279.4	1844.9	1403.7	3485.4	1743.5	658.1	11.2	0.03636	0.0376806		5633.2	7869.7	3286.7	1023.3	2442.5	3453.1	2783.9	5493	2843.7	1283.2	10.4	0.02597	0.0223846		0.908076	10.8		gb:AK070809.1 DB_XREF=gi:32980832 TID=Os.11450.1 CNT=184 FEA=FLmRNA TIER=FL STK=1 UG=Os.11450 UG_TITLE=(japonica cultivar-group) putative PGPD14 protein (pollen germination related protein) (P0480C01.20), mRNA DEF=Oryza sativa (japonica cultivar-	LOC_Os01g52110		unspliced-genomic RING finger and CHY zinc finger domain-containing protein 1, putative, expressed		AT5G25560	4e-123	246897_at
Os.1311.1.S1_at	4693.8	7481.3	11184.6	13944.7	5551.1	5047.1	2775.1	6012.9	11039.2	5187.2	17.6	0.04292	0.0146557		3610.5	6575.3	11712.4	12590.8	3979	5139.6	1831.5	5083.6	12585.2	7244.7	17.6	0.009	0.0139601		0.948148	17.6		gb:AF006825.1 DB_XREF=gi:2267005 GEN=BiP TID=Os.1311.1 CNT=89 FEA=FLmRNA TIER=FL+Stack STK=35 UG=Os.1311 DEF=Oryza sativa endosperm lumenal binding protein (BiP) mRNA, complete cds. PROD=endosperm lumenal binding protein FL=gb:AK119653.1 gb:AF0	LOC_Os02g02410		unspliced-genomic luminal-binding protein 3 precursor, putative, expressed		AT5G42020	0	245956_s_at
Os.12168.2.S1_s_at	28755.8	30738.1	31829.6	28320.6	24624.8	20324	21178.5	33962.2	31098.8	24457	14.4	0.01246	0.0104112		20623.3	33171.2	32265.4	27943.7	22544	21972.7	19518.3	32715.4	27773.7	19934.5	14.4	0.0475	0.0106679		0.829281	14.4		gb:AK105038.1 DB_XREF=gi:32990247 TID=Os.12168.2 CNT=19 FEA=FLmRNA TIER=FL STK=0 UG=Os.12168 UG_TITLE=Clone glyceraldehyde-3-phosphate dehydrogenase (Gpc) mRNA, complete cds DEF=Oryza sativa (japonica cultivar-group) cDNA clone:001-036-C12, full	LOC_Os08g03290		unspliced-genomic glyceraldehyde-3-phosphate dehydrogenase, cytosolic, putative, expressed		AT3G04120	9e-161	258588_s_at
Os.12416.1.S1_at	5093.8	17863.4	8659.6	526.1	413.4	726.9	3709.6	27683	17597.1	12071.6	13.6	0.02954	0.010786		2258	17103	11078.3	3520	2579.2	1272.5	3695.5	22803.6	7640.8	4955.3	13.2	0.0355	0.023649		0.887525	13.4		gb:AB000801.2 DB_XREF=gi:13447615 TID=Os.12416.1 CNT=119 FEA=FLmRNA TIER=FL+Stack STK=34 UG=Os.12416 DEF=Oryza sativa mRNA for chalcone synthase, complete cds. PROD=chalcone synthase FL=gb:AB000801.2 gb:AK067810.1 REP_ORG=O. sativa	LOC_Os11g32650		unspliced-genomic chalcone synthase, putative, expressed		AT5G13930	0	250207_at
Os.2258.1.S1_at	3366.7	2522.6	4398.9	5340.6	5117.6	5441.9	1892.7	2964.8	4035	6339.9	22.4	0.0027	0.0293142		2103	2765.7	3323.8	5762.4	5395.9	5091.2	1978.5	2935.9	3656.9	4558.4	22.8	0.00192	0.00505057		0.859429	22.6		gb:AF073695.1 DB_XREF=gi:4574134 GEN=rcs1 TID=Os.2258.1 CNT=73 FEA=FLmRNA TIER=FL+Stack STK=33 UG=Os.2258 DEF=Oryza sativa cysteine synthase (rcs1) mRNA, complete cds. PROD=cysteine synthase FL=gb:AK061993.1 gb:AK099598.1 gb:AF073695.1 REP_ORG	LOC_Os12g42980		unspliced-genomic cysteine synthase, putative, expressed		AT4G14880	1e-139	245286_at
Os.7890.1.S1_a_at	40356.6	36813.2	39628.6	20805	742	564.7	11053.6	29616.8	35862.9	17326.3	13.6	0.00901	0.00144415		42813.8	33409.6	37743.2	18422.4	227.4	442.7	12033.6	25599	32207.3	15404.8	13.2	0.02459	0.00219904		0.990841	13.4		gb:AY445626.1 DB_XREF=gi:38374125 TID=Os.7890.1 CNT=910 FEA=FLmRNA TIER=FL+Stack STK=29 UG=Os.7890 DEF=Oryza sativa (japonica cultivar-group) chlorophyll ab binding protein presusor mRNA, complete cds; nuclear gene for chloroplast product. PROD=c	LOC_Os08g33820		unspliced-genomic chlorophyll a-b binding protein 4, chloroplast precursor, putative, expressed		AT3G47470	6e-104	252430_at
Os.7890.1.S1_x_at	37246	34225.8	33851.4	21260.8	876.9	751.6	11499.8	30066.2	30436.6	17644.7	13.6	0.00815	0.00553548		36932.3	31476.2	32902.2	17416.1	376.7	631.2	13009.3	24895.4	30546.3	15075.6	13.2	0.01121	0.00148804		0.989065	13.4		gb:AY445626.1 DB_XREF=gi:38374125 TID=Os.7890.1 CNT=910 FEA=FLmRNA TIER=FL+Stack STK=29 UG=Os.7890 DEF=Oryza sativa (japonica cultivar-group) chlorophyll ab binding protein presusor mRNA, complete cds; nuclear gene for chloroplast product. PROD=c	LOC_Os08g33820		unspliced-genomic chlorophyll a-b binding protein 4, chloroplast precursor, putative, expressed		AT3G47470	6e-104	252430_at
Os.7986.1.S1_at	49290.4	59337.3	46566.5	44374.4	44043.3	38683.7	48551.6	59837.3	47537.5	40944.6	12	0.01484	0.0203864		56229.3	55168.8	51810.3	39891.6	43614	34401.1	47265.4	48900.6	45154.4	38724.6	11.6	0.04542	0.0109286		0.744017	11.8		gb:AY339372.1 DB_XREF=gi:33440011 TID=Os.7986.1 CNT=84 FEA=FLmRNA TIER=FL+Stack STK=29 UG=Os.7986 DEF=Oryza sativa (japonica cultivar-group) catalase mRNA, complete cds. PROD=catalase FL=gb:AB020502.1 gb:AK062174.1 gb:AY339372.1 gb:AK066378.1 R	LOC_Os03g03910		unspliced-genomic catalase-1, putative, expressed		AT4G35090	0	253174_at
Os.8240.1.S1_at	9846.2	15901.7	18668.7	13072.2	8076.6	10183.2	5013.9	14099	15923.1	10744.2	15.6	0.0175	0.0137516		7051.2	11809.5	17242.3	13417.5	7863	11989.5	5126.5	13164.9	17248.3	8302.7	16	0.08746	0.0389805		0.897883	15.8		gb:AK122115.1 DB_XREF=gi:37991761 TID=Os.8240.1 CNT=174 FEA=FLmRNA TIER=FL+Stack STK=27 UG=Os.8240 UG_TITLE=(japonica cultivar-group) isolate 23829 wheat adenosylhomocysteinase-like protein mRNA, complete cds DEF=Oryza sativa (japonica cultivar-g	LOC_Os11g26850		unspliced-genomic adenosylhomocysteinase, putative, expressed		AT4G13940	0	245356_at
Os.421.1.S1_a_at	3625.8	5854.6	15524.5	19781.6	8074.8	6789.5	3818.2	4990.2	16270.7	17707.2	19.2	0.00052	0.00477601		2852.4	5100.3	13984.5	18999.3	7804	7758.8	4228.6	4731.4	15657.8	16680.4	19.6	0.00112	0.0063428		0.994877	19.4		gb:AB053295.1 DB_XREF=gi:12082336 GEN=NADP-ME2 TID=Os.421.1 CNT=61 FEA=FLmRNA TIER=FL+Stack STK=27 UG=Os.421 DEF=Oryza sativa (japonica cultivar-group) NADP-ME2 mRNA for NADP dependent malic enzyme, complete cds. PROD=NADP dependent malic enzyme	LOC_Os01g52500		unspliced-genomic NADP-dependent malic enzyme, putative, expressed		AT1G79750	0	261355_at
Os.5529.4.S1_s_at	46.8	113	25.1	2.7	17.1	21.6	63.9	57.1	43.9	24.3	10.8	0.02453	0.0300938		203.8	239.9	72.1	39	80.3	38.5	46.6	166	4	8.2	10	0.12822	0.048148		0.685931	10.4		gb:X62091.1 DB_XREF=gi:5777591 TID=Os.5529.4 CNT=2 FEA=mRNA TIER=ConsEnd STK=1 UG=Os.5529 DEF=LOW MOLECULAR WEIGHT GLOBULIN. PROD=low molecular weight globulin REP_ORG=O. sativa	LOC_Os07g11380		unspliced-genomic seed allergenic protein RAG2 precursor, putative, expressed
Os.4837.1.S1_at	3782.1	2658.7	2911.3	3217.3	4090.7	7210.1	2403.4	2553.6	2639.3	1960.8	3.2	0.08286	0.0450963		2916.2	2341.9	1523	2452.1	3464.2	6262.3	2388.9	1756.7	2206.8	1996.7	3.2	0.02594	0.02364		0.957779	3.2		gb:U65956.1 DB_XREF=gi:1519248 TID=Os.4837.1 CNT=100 FEA=FLmRNA TIER=FL+Stack STK=25 UG=Os.4837 DEF=Oryza sativa GF14-b protein mRNA, complete cds. PROD=GF14-b protein FL=gb:AK071822.1 gb:AK071311.1 gb:AK062065.1 gb:U65956.1 gb:AK101938.1 gb:AK0	LOC_Os04g38870		unspliced-genomic 14-3-3-like protein GF14-6, putative, expressed		AT3G02520	2e-121	258489_at
Os.7894.1.S1_at	2333	3899.8	7439.2	8134.7	3525.4	4274.8	1705.2	4261	7943.9	6373	18.4	0.00244	0.0117706		1557.1	3648.9	6821.4	7853.1	2899.5	4484.1	1521	4131.9	8046	5417.9	18	0.01062	0.0217905		0.987122	18.2		gb:AF486280.2 DB_XREF=gi:30313360 TID=Os.7894.1 CNT=62 FEA=FLmRNA TIER=FL+Stack STK=25 UG=Os.7894 DEF=Oryza sativa cytosolic 6-phosphogluconate dehydrogenase mRNA, complete cds. PROD=cytosolic 6-phosphogluconate dehydrogenase FL=gb:AF486280.2 gb	LOC_Os06g02144		unspliced-genomic 6-phosphogluconate dehydrogenase, decarboxylating, putative, expressed		AT3G02360	0	256328_at
Os.37849.1.A1_at	106.1	342.4	561.5	66.6	58.5	77.2	402.6	276.8	184	80.5	12.8	0.10054	0.0152979		157.6	717.7	953.3	463.2	95.1	82.7	137.1	189	170.3	125.4	15.2	0.20174	0.00331053		0.682966	14		gb:AK068289.1 DB_XREF=gi:32978307 TID=Os.37849.1 CNT=40 FEA=FLmRNA TIER=FL+Stack STK=25 UG=Os.37849 UG_TITLE=(japonica cultivar-group) cDNA clone:J013147E18, full insert sequence DEF=Oryza sativa (japonica cultivar-group) cDNA clone:J013147E18, f	LOC_Os05g02780		unspliced-genomic glycine-rich protein A3, putative, expressed
Os.37849.1.A1_s_at	22786.9	26570.8	19656.7	16750.7	15645.4	14201	17788.4	25545.8	21009.4	18691.7	12.4	0.00759	0.0054846		22451.8	28251.5	20946.6	16261.1	14359.6	11362.3	18065.9	22990.8	19904	17767.1	12.8	0.00646	0.00320143		0.957583	12.6		gb:AK068289.1 DB_XREF=gi:32978307 TID=Os.37849.1 CNT=40 FEA=FLmRNA TIER=FL+Stack STK=25 UG=Os.37849 UG_TITLE=(japonica cultivar-group) cDNA clone:J013147E18, full insert sequence DEF=Oryza sativa (japonica cultivar-group) cDNA clone:J013147E18, f	LOC_Os05g02780		unspliced-genomic glycine-rich protein A3, putative, expressed
Os.11573.2.A1_a_at	54978.4	59446.1	35202.1	9175.1	31644.3	39284.1	56545.2	62013.8	33729.9	13193.9	9.6	0.00023	0.00433492		56284.7	51746.8	40993.3	14898.9	35010.5	37496.9	48770	47165.2	34396.4	13816.5	9.2	0.00169	0.00527405		0.95174	9.4		gb:CB673145 DB_XREF=gi:29676870 DB_XREF=OSJNEe07I17.r CLONE=OSJNEe07I17 TID=Os.11573.2 CNT=444 FEA=FLmRNA TIER=Stack STK=6 UG=Os.11573 UG_TITLE=OsrcaA1 mRNA for RuBisCO activase large isoform precursor, complete cds FL=gb:U74321.1 gb:AB034748.1	LOC_Os11g47970		unspliced-genomic ribulose bisphosphate carboxylase/oxygenase activase, chloroplast precursor, putative, expressed		AT2G39730	7e-172	245061_at
Os.22029.1.S1_a_at	16809.1	14570.6	9411.3	789.8	1447.2	2686.8	15724.1	11483.6	7295.1	1149	10.4	0.0005	0.00306724		21192.3	13792.5	8470.8	845.7	1830.7	2675.9	18544.5	10934.6	7181.5	915.9	9.6	0.00315	0.00482507		0.979713	10		gb:AF284781.1 DB_XREF=gi:9944966 GEN=Lls1 TID=Os.22029.1 CNT=60 FEA=FLmRNA TIER=FL+Stack STK=23 UG=Os.22029 DEF=Oryza sativa LLS1 protein (Lls1) mRNA, complete cds. PROD=LLS1 protein FL=gb:AF284781.1 gb:AK071899.1 gb:AK065124.1 gb:AK062219.1 R	LOC_Os10g41780		unspliced-genomic chlorophyllide a oxygenase, chloroplast precursor, putative, expressed		AT1G44446	0	245242_at
Os.11609.1.S1_at	4683.2	4858.8	3484.6	3389.5	5867	5727.5	6237.5	4303.4	4037.9	3703.9	4.8	0.01089	0.0118676		5833.3	6949.5	4214.3	4942.2	6475.4	6675.9	6799.2	4474.1	4517.4	3892.1	5.2	0.03761	0.0334023		0.860312	5		gb:AK065558.1 DB_XREF=gi:32975576 TID=Os.11609.1 CNT=50 FEA=FLmRNA TIER=FL+Stack STK=23 UG=Os.11609 UG_TITLE=(japonica cultivar-group) OsUEL-1 mRNA for UDP-galactose 4-epimerase-like protein, complete cds DEF=Oryza sativa (japonica cultivar-group	LOC_Os07g04690		unspliced-genomic UDP-arabinose 4-epimerase 1, putative, expressed		AT1G30620	0	263221_at
Os.11255.1.S1_at	19843.2	27083.3	14312.9	6740.2	10801.3	15615.7	16180.2	29876.4	21216.9	8958.2	11.2	0.00735	0.0117944		16078.7	29983.6	20791.1	8002.7	10761.8	14007.2	14502.6	31271.5	22351.2	8798.6	12.4	0.00812	0.012804		0.940577	11.8		gb:AY100689.1 DB_XREF=gi:21360379 GEN=GPX1 TID=Os.11255.1 CNT=55 FEA=FLmRNA TIER=FL+Stack STK=22 UG=Os.11255 DEF=Oryza sativa glutathione peroxidase 1 (GPX1) mRNA, complete cds. PROD=glutathione peroxidase 1 FL=gb:AK062772.1 gb:AK058931.1 gb:AY	LOC_Os04g46960		unspliced-genomic phospholipid hydroperoxide glutathione peroxidase, putative, expressed		AT4G11600	2e-79	254890_at
Os.12622.1.S1_at	25743.5	26545.6	20081	15788.6	20308.8	17529.3	25288.7	25517.9	18056.9	17729.6	9.6	0.0073	0.0163609		30369.1	24962.2	20652.8	19064.4	21608.9	18451.5	24029.5	25717.8	19595.6	18873.6	9.2	0.04148	0.0146921		0.892063	9.4		gb:AK099215.1 DB_XREF=gi:32984424 TID=Os.12622.1 CNT=57 FEA=FLmRNA TIER=FL+Stack STK=21 UG=Os.12622 UG_TITLE=Ribulose-5-phosphate-3-epimerase (RPE) mRNA, complete cds DEF=Oryza sativa (japonica cultivar-group) cDNA clone:J013084F18, full insert s	LOC_Os03g07300		unspliced-genomic ribulose-phosphate 3-epimerase, chloroplast precursor, putative, expressed		AT5G61410	5e-115	247523_at
Os.12696.1.S1_at	32615.6	30101.1	20321.7	18489.2	27376.4	25414.9	30622.1	30668.3	20480.8	20417	7.6	0.00376	0.0104592		37885.9	31048.3	23592.6	22582.7	28666.6	25313.3	33142	28403	20932.7	21872.4	7.2	0.01283	0.0152318		0.919272	7.4		gb:AK119209.1 DB_XREF=gi:37988832 TID=Os.12696.1 CNT=110 FEA=FLmRNA TIER=FL+Stack STK=20 UG=Os.12696 UG_TITLE=(indica cultivar-group) sedoheptulose-1,7-bisphosphatase precursor, mRNA, complete cds; nuclear gene for chloroplast product DEF=Oryza s	LOC_Os04g16680		unspliced-genomic sedoheptulose-1,7-bisphosphatase, chloroplast precursor, putative, expressed		AT3G55800	2e-167	251762_at
Os.14095.1.S1_at	2481.8	936.3	948.8	2118.7	2722.2	3643.3	1888.2	1320.5	985.1	1905.3	2.4	0.00015	0.00193271		2143.1	1067.9	828	2401.3	3445.4	3917.2	2162.3	1350.3	992	2541.4	2	1e-05	0.00073465		0.957157	2.2		gb:AF297651.1 DB_XREF=gi:33340006 TID=Os.14095.1 CNT=56 FEA=FLmRNA TIER=FL+Stack STK=20 UG=Os.14095 DEF=Oryza sativa putative aminotransferase mRNA, complete cds. PROD=putative aminotransferase FL=gb:AK061967.1 gb:AF297651.1 gb:AK102306.1 REP_O	LOC_Os04g52450		unspliced-genomic aminotransferase y4uB, putative, expressed		AT3G22200	0	256765_at
Os.12056.1.S1_at	45051.9	43975.7	34364	18417.5	13790.3	13206.2	41243.1	38399.9	30361.1	20224.3	11.2	0.00098	0.0028836		49298.2	36140.4	30906	21369	14480.9	13114.7	43165.5	30335.1	26264.5	18564.4	10.4	0.02364	0.0144294		0.939943	10.8		gb:AK058788.1 DB_XREF=gi:32968806 TID=Os.12056.1 CNT=134 FEA=FLmRNA TIER=FL+Stack STK=19 UG=Os.12056 UG_TITLE=(japonica cultivar-group) isolate 23056 photosystem I protein-like protein mRNA, complete cds DEF=Oryza sativa (japonica cultivar-group)	LOC_Os07g05480		unspliced-genomic photosystem I reaction center subunit psaK, chloroplast precursor, putative, expressed		AT1G30380	3e-43	256309_at
Os.2241.1.S1_a_at	11162.3	18381.4	13056.1	6847.7	5193.1	6448.9	7512.9	19485.8	14697.3	5258.1	12.8	0.00242	0.00787863		10710.2	15913.8	13703.8	5714.6	4514.1	6059	6205.2	20768	13945.9	4329.9	12.8	0.00505	0.011834		0.984114	12.8		gb:AK059818.1 DB_XREF=gi:32969836 TID=Os.2241.1 CNT=55 FEA=FLmRNA TIER=FL+Stack STK=19 UG=Os.2241 UG_TITLE=(japonica cultivar-group) glutathione S-transferase II (P0403C05.5), mRNA DEF=Oryza sativa (japonica cultivar-group) cDNA clone:006-205-C06	LOC_Os01g55830		unspliced-genomic glutathione S-transferase GSTF2, putative, expressed		AT3G62760	5e-40	251231_at
Os.12367.1.S1_at	6423.4	6268.5	3990.1	2488.4	2769.4	2310.7	5063.5	6783.6	4293.3	3111.9	11.2	0.00179	0.00319279		9508.1	6905.2	4551.5	3085	3009.2	2716.1	5565	7652	4923.8	3134.2	10.8	0.01049	0.00260125		0.953105	11		gb:AB110167.1 DB_XREF=gi:32352131 TID=Os.12367.1 CNT=39 FEA=FLmRNA TIER=FL+Stack STK=19 UG=Os.12367 UG_TITLE=(japonica cultivar-group) isolate 29037 gamma hydroxybutyrate dehydrogenase-like protein mRNA, complete cds DEF=Oryza sativa (japonica cu	LOC_Os02g35500		unspliced-genomic 2-hydroxy-3-oxopropionate reductase, putative, expressed		AT3G25530	2e-128	257911_at
Os.1151.1.S1_at	8766.1	7563	9546.5	9827.2	9752.3	8473.9	8906.3	8548	8599.9	10431.5	22	0.02954	0.0380447		6895.2	7280.1	7893.4	11081	9672	9136.7	8865.3	7602.7	8686.4	9439.4	22.8	0.01443	0.00904024		0.631357	22.4		gb:AB055076.1 DB_XREF=gi:12597250 TID=Os.1151.1 CNT=36 FEA=FLmRNA TIER=FL+Stack STK=18 UG=Os.1151 DEF=Oryza sativa (japonica cultivar-group) mRNA for mitochondrial ATP synthase 6 KD subunit, complete cds. PROD=mitochondrial ATP synthase 6 KD subu	LOC_Os03g40920		unspliced-genomic expressed protein		AT5G59613	3e-23
Os.1151.1.S1_x_at	7188.9	6734.7	7844.3	8712.4	7901.8	7700.8	7198.2	7222.8	7452.5	8951.8	21.6	0.00348	0.0117393		5942.4	6409.1	7228.3	9788.2	8466.3	8927.7	8183.1	7026.9	7957.7	8772.5	23.2	0.02869	0.0075849		0.756022	22.4		gb:AB055076.1 DB_XREF=gi:12597250 TID=Os.1151.1 CNT=36 FEA=FLmRNA TIER=FL+Stack STK=18 UG=Os.1151 DEF=Oryza sativa (japonica cultivar-group) mRNA for mitochondrial ATP synthase 6 KD subunit, complete cds. PROD=mitochondrial ATP synthase 6 KD subu	LOC_Os03g40920		unspliced-genomic expressed protein		AT5G59613	3e-23
Os.12190.1.S1_at	2196.9	6144.9	6059.8	2790	2174.5	2177.9	924.6	9060.8	7477.1	2891.4	14.4	0.01859	0.0182402		1467.3	8495.1	7298.9	2681	2287.7	2334.9	719.9	8845.5	8533.4	2793.3	14.4	0.01456	0.0149435		0.97028	14.4		gb:AK122129.1 DB_XREF=gi:37991775 TID=Os.12190.1 CNT=66 FEA=FLmRNA TIER=FL+Stack STK=18 UG=Os.12190 UG_TITLE=10 kDa chaperonin mRNA, complete cds DEF=Oryza sativa (japonica cultivar-group) cDNA clone:J033132M21, full insert sequence. FL=gb:AF009	LOC_Os07g44740		unspliced-genomic chaperonin, putative, expressed		AT1G14980	3e-34	260714_at
Os.10931.1.S1_at	40071	29693.8	23530.6	23404.8	25647.6	30120	38365.2	34511.6	27501.5	19232.3	8	0.0006	0.0010136		42621	28742.9	23819.4	21378.7	25187.5	26469.3	37624.4	28774.3	23789.6	19374.8	7.6	0.00428	0.00571032		0.943231	7.8		gb:D17760.1 DB_XREF=gi:1132482 GEN=ARF TID=Os.10931.1 CNT=301 FEA=FLmRNA TIER=FL+Stack STK=17 UG=Os.10931 DEF=Oryza sativa (japonica cultivar-group) mRNA for ADP-ribosylation factor, complete cds. PROD=ADP-ribosylation factor FL=gb:AK061970.1 g	LOC_Os05g41060		unspliced-genomic ADP-ribosylation factor, putative, expressed		AT3G62290	4e-100	251257_at
Os.146.1.S1_at	9907	13449.9	13948.5	13568.5	13648.7	10782	10971.9	16415.6	15793.3	15624.3	17.2	0.02424	0.0175391		7772.6	14880.1	13431.2	14330.9	12252.9	10244.3	9822.9	16714.3	14661.6	12844.5	16.4	0.04667	0.0245302		0.88262	16.8		gb:D16292.1 DB_XREF=gi:303848 GEN=NDKR TID=Os.146.1 CNT=127 FEA=FLmRNA TIER=FL+Stack STK=17 UG=Os.146 DEF=Oryza sativa mRNA for nucleoside diphosphate kinase, complete cds. PROD=nucleoside diphosphate kinase FL=gb:D16292.1 gb:AK121796.1 REP_OR	LOC_Os07g30970		unspliced-genomic nucleoside diphosphate kinase 1, putative, expressed		AT4G09320	8e-63	255089_at
Os.139.1.S1_at	5929	4246	6767.1	7910.4	8999.6	9794.2	9089.7	4952.8	7269.6	7875.5	1.2	0.0235	0.00965557		7828	6188	8803.4	10418.7	12059.8	13322.4	9847.4	6250.1	9327.8	10167	0.8	0.00328	0.00440467		0.950924	1		gb:D12627.1 DB_XREF=gi:303843 TID=Os.139.1 CNT=104 FEA=FLmRNA TIER=FL+Stack STK=17 UG=Os.139 DEF=Oryza sativa (japonica cultivar-group) mRNA for eukaryotic initiation factor 4A, complete cds. PROD=eukaryotic initiation factor 4A FL=gb:AK105454.1	LOC_Os06g48750		unspliced-genomic eukaryotic initiation factor 4A, putative, expressed		AT3G13920	0	258210_at
Os.2448.1.S2_at	5618.3	3405.1	2226.2	3379.8	4444.5	5943.1	5933.8	1987.1	1889.1	3068.1	4.4	0.00055	0.00506105		4845.9	1837.6	1603.5	3495.3	4241	4306.6	5709.3	2494.4	1512.4	2994.9	4	0.00591	0.0106471		0.903019	4.2		gb:AK100650.1 DB_XREF=gi:32985859 TID=Os.2448.1 CNT=112 FEA=FLmRNA TIER=FL+Stack STK=17 UG=Os.2448 UG_TITLE=Small GTP-binding protein RACBP (RACB) mRNA, complete cds DEF=Oryza sativa (japonica cultivar-group) cDNA clone:J023111D06, full insert se	LOC_Os02g44980		unspliced-genomic amino acid transport protein, putative, expressed		AT4G38250	3e-128	253006_at
Os.3704.1.S1_at	3324	2949.3	3644.4	4423.9	3672.9	3270.5	2613.6	4196.6	3889.2	4372.5	19.2	0.04179	0.0519433		2600.8	3922.8	4526	5572.8	3679.9	3717	2864.7	4569.1	5327.3	5234.7	18.4	0.00238	0.00934131		0.818647	18.8		gb:AB026558.1 DB_XREF=gi:8671491 GEN=OsPAA1 TID=Os.3704.1 CNT=72 FEA=FLmRNA TIER=FL+Stack STK=17 UG=Os.3704 DEF=Oryza sativa (japonica cultivar-group) OsPAA1 mRNA for alpha 1 subunit of 20S proteasome, complete cds. PROD=alpha 1 subunit of 20S p	LOC_Os03g08280		unspliced-genomic proteasome subunit alpha type 6, putative, expressed		AT2G05840	3e-121	266036_s_at
Os.5282.1.S1_a_at	3387.7	4008.7	7495.6	8635.6	6033	5765.7	2948.2	4244.9	7123.3	9382.1	20.4	0.00023	0.00248237		1685.4	3549.4	7592.6	10235.7	6259.7	6703.5	2644.2	4775.6	7595.6	8987.5	20.4	0.00105	0.00461733		0.959544	20.4		gb:D26060.1 DB_XREF=gi:436782 GEN=T151 TID=Os.5282.1 CNT=86 FEA=FLmRNA TIER=FL+Stack STK=17 UG=Os.5282 DEF=Oryza sativa mRNA for cyc07, complete cds. PROD=cyc07 FL=gb:D26060.1 gb:AK104699.1 gb:AK069251.1 gb:AK104243.1 REP_ORG=O. sativa	LOC_Os03g10350		unspliced-genomic NPGR1, putative, expressed		AT1G27460	1e-176	264449_at
Os.5282.1.S1_at	3413.6	3398.1	6768.9	7650.3	5287.4	4711.9	2904.5	4063	6962	8630.6	20	0.00036	0.0033381		1295.1	3142.7	6820.7	9084.7	5458.1	5349	2569.5	4313	7173.9	8376	20	0.00039	0.00322032		0.949784	20		gb:D26060.1 DB_XREF=gi:436782 GEN=T151 TID=Os.5282.1 CNT=86 FEA=FLmRNA TIER=FL+Stack STK=17 UG=Os.5282 DEF=Oryza sativa mRNA for cyc07, complete cds. PROD=cyc07 FL=gb:D26060.1 gb:AK104699.1 gb:AK069251.1 gb:AK104243.1 REP_ORG=O. sativa	LOC_Os03g10350		unspliced-genomic NPGR1, putative, expressed		AT1G27460	1e-176	264449_at
Os.5282.1.S2_at	29.1	80.6	168.5	232	125.9	77.8	29.2	95.3	223.4	212	19.2	5e-05	0.0108666		10.6	101	240	156	98.3	61	20.8	99.4	176	115.8	17.6	0.00379	0.0100534		0.795057	18.4		gb:D26060.1 DB_XREF=gi:436782 GEN=T151 TID=Os.5282.1 CNT=86 FEA=FLmRNA TIER=ConsEnd STK=0 UG=Os.5282 DEF=Oryza sativa mRNA for cyc07, complete cds. PROD=cyc07 FL=gb:D26060.1 gb:AK104699.1 gb:AK069251.1 gb:AK104243.1 REP_ORG=O. sativa	LOC_Os03g10350		unspliced-genomic NPGR1, putative, expressed		AT1G27460	1e-176	264449_at
Os.22169.1.S1_a_at	1188	1837.5	1994.7	1978.7	1376.6	682.4	1063.7	2160.1	2021.7	1780.5	16	0.00051	0.00404802		1517.8	2644.3	2664.4	2119.3	1390.4	1090	1142.3	2641.6	2205.2	1577.3	14.8	0.00343	0.0035009		0.875203	15.4		gb:AF136268.1 DB_XREF=gi:4704817 GEN=Rbe1 TID=Os.22169.1 CNT=70 FEA=FLmRNA TIER=FL+Stack STK=17 UG=Os.22169 DEF=Oryza sativa subsp. japonica starch-branching enzyme I (Rbe1) mRNA, complete cds. PROD=starch-branching enzyme I FL=gb:D11082.1 gb:A	LOC_Os06g51084		unspliced-genomic 1,4-alpha-glucan branching enzyme, chloroplast precursor, putative, expressed		AT5G03650	0	250906_at
Os.22169.2.S2_a_at	2478.9	3251.2	3728.9	3335.7	2819.6	1739.3	2355	3290.8	3802	3683.2	16.8	4e-05	0.00149869		3172	5305.5	5139.2	4918.4	3423.3	2793.3	2704	5605	4812.8	3937.8	15.6	0.00505	0.0065662		0.791096	16.2		gb:AK068920.1 DB_XREF=gi:32978944 TID=Os.22169.2 CNT=5 FEA=FLmRNA TIER=FL STK=1 UG=Os.22169 UG_TITLE=(japonica cultivar-group) mRNA for branching enzyme, complete cds DEF=Oryza sativa (japonica cultivar-group) cDNA clone:J013170H02, full insert s	LOC_Os06g51084		unspliced-genomic 1,4-alpha-glucan branching enzyme, chloroplast precursor, putative, expressed		AT5G03650	0	250906_at
Os.22169.2.S2_x_at	2998.4	4003.1	4749.3	4315.4	3542.2	2136.7	3196.2	4331.6	4675.4	4315.6	16.4	5e-05	0.00232895		3975.8	5929.1	5912.7	5405	3854.3	2899.2	3088.4	6395.5	5543.9	4319.6	15.2	0.00306	0.0049765		0.836222	15.8		gb:AK068920.1 DB_XREF=gi:32978944 TID=Os.22169.2 CNT=5 FEA=FLmRNA TIER=FL STK=1 UG=Os.22169 UG_TITLE=(japonica cultivar-group) mRNA for branching enzyme, complete cds DEF=Oryza sativa (japonica cultivar-group) cDNA clone:J013170H02, full insert s	LOC_Os06g51084		unspliced-genomic 1,4-alpha-glucan branching enzyme, chloroplast precursor, putative, expressed		AT5G03650	0	250906_at
Os.7794.1.S1_at	453.2	11.4	9.5	335.1	541.3	1866.8	304.1	44.3	15.8	188	2.8	0.02345	0.0222197		77.3	160.6	75	294.7	375.8	1238.5	293.9	147.8	65.5	205.7	2.8	0.07396	0.0319803		0.960186	2.8		gb:AF309379.1 DB_XREF=gi:11177834 TID=Os.7794.1 CNT=41 FEA=FLmRNA TIER=FL+Stack STK=17 UG=Os.7794 DEF=Oryza sativa (japonica cultivar-group) clone S2148_A putative glutathione S-transferase OsGSTU3 mRNA, complete cds. PROD=putative glutathione S-	LOC_Os10g38501		unspliced-genomic glutathione S-transferase GSTU6, putative, expressed		AT1G10360	3e-57	264435_at
Os.7158.1.S1_a_at	4894.9	6960.9	11366.6	15255.5	9404.5	6985.2	4478.9	7774.2	11033.9	7543.5	19.2	0.02086	0.0135644		3727	7456.5	13115.9	15448.9	9879.5	8010.7	3545	6885.8	12741.7	11047.4	19.2	0.0006	0.00531044		0.938001	19.2		gb:AK065341.1 DB_XREF=gi:32975359 TID=Os.7158.1 CNT=49 FEA=FLmRNA TIER=FL+Stack STK=16 UG=Os.7158 UG_TITLE=MRNA for calcium-binding protein, complete cds DEF=Oryza sativa (japonica cultivar-group) cDNA clone:J013000E04, full insert sequence. FL=	LOC_Os07g14270		unspliced-genomic calreticulin precursor, putative, expressed		AT1G09210	5e-162	264260_at
Os.11535.1.S1_at	14466.5	15322.9	12315.4	9043.8	10319.3	11197.1	11712.7	18771.6	13895	7977.6	11.2	0.01054	0.0169958		12887.5	19560.8	14310.5	8268.6	9361.5	10694.2	9867.2	17707.7	13136.6	7252.7	12	0.01526	0.0171624		0.890648	11.6		gb:AB011262.1 DB_XREF=gi:5360220 TID=Os.11535.1 CNT=43 FEA=FLmRNA TIER=FL+Stack STK=16 UG=Os.11535 DEF=Oryza sativa (japonica cultivar-group) mRNA for nuclear transport factor 2 (NTF2), complete cds. PROD=nuclear transport factor 2 (NTF2) FL=gb:	LOC_Os08g42000		unspliced-genomic nuclear transport factor 2, putative, expressed		AT1G27310	7e-46	264446_at
Os.4156.1.S1_at	855.3	677.5	2075.5	2296.3	1894.7	1221.4	908.5	726.6	1647	3159	20.8	0.00131	0.0136786		546.7	544.6	1096.5	3016.3	1829	1446.8	704.5	578.8	1329.2	2603.9	22	0.00082	0.00613226		0.862897	21.4		gb:AB019533.1 DB_XREF=gi:4760552 TID=Os.4156.1 CNT=50 FEA=FLmRNA TIER=FL+Stack STK=16 UG=Os.4156 DEF=Oryza sativa mRNA for Nad-dependent formate dehydrogenase, complete cds. PROD=Nad-dependent formate dehydrogenase FL=gb:AK065872.1 gb:AK104788.1	LOC_Os06g29180		unspliced-genomic formate dehydrogenase 1, mitochondrial precursor, putative, expressed		AT5G14780	2e-171	246595_at
Os.2450.1.S1_a_at	2447	2008.9	2741.7	4472.3	4994.5	4410.2	2752.1	2530.9	2646	3921.2	0	4e-05	0.000966801		2302.3	2022.5	2275.7	4451.5	4810	3951.7	2704.8	2325	2707.2	4453.4	23.6	4e-05	0.00158226		0.964944	23.8		gb:AF271995.1 DB_XREF=gi:9828444 TID=Os.2450.1 CNT=49 FEA=FLmRNA TIER=FL+Stack STK=16 UG=Os.2450 DEF=Oryza sativa phosphoenolpyruvate carboxylase mRNA, complete cds. PROD=phosphoenolpyruvate carboxylase FL=gb:AK065029.1 gb:AF271995.1 gb:AK062201	LOC_Os02g14770		unspliced-genomic phosphoenolpyruvate carboxylase 1, putative, expressed		AT3G14940	0	257217_at
Os.4189.1.S1_at	18827	13586.1	17602.2	31559.7	27621.4	28023	16342.1	20137.8	20602.8	25884.2	23.6	0.00456	0.011381		19538.3	18664.4	19712.6	26864.8	27032.9	19364.6	16464	18982.8	17881.3	28900.6	22.4	0.00698	0.0152484		0.739701	23		gb:AB025310.1 DB_XREF=gi:5926739 TID=Os.4189.1 CNT=41 FEA=FLmRNA TIER=FL+Stack STK=16 UG=Os.4189 DEF=Oryza sativa mRNA for asparaginyl endopeptidase, complete cds. PROD=asparaginyl endopeptidase FL=gb:AK068011.1 gb:AK067597.1 gb:AB025310.1 REP_	LOC_Os01g37910		unspliced-genomic vacuolar processing enzyme precursor, putative, expressed		AT4G32940	0	253358_at
Os.2854.1.S1_at	15631.6	18961	17724.7	14233.7	10822.5	9622.1	11932	22026.3	17807	14669.6	14	0.00149	0.00445448		16555.2	15431.8	19090.3	15884.7	9982.8	9097.5	11408.8	21830.5	19066	13593.5	14.4	0.00575	0.00937796		0.928665	14.2		gb:AB110171.1 DB_XREF=gi:32352139 TID=Os.2854.1 CNT=59 FEA=FLmRNA TIER=FL+Stack STK=15 UG=Os.2854 UG_TITLE=(japonica cultivar-group) mRNA for hypothetical protein, complete cds, clone: 13YPB021 DEF=Oryza sativa (japonica cultivar-group) mRNA for	LOC_Os03g48080		unspliced-genomic p8MTCP1, putative, expressed		AT5G64400	2e-28	247285_at
Os.11164.1.S1_at	117.8	7.6	20.2	17.8	17.2	252.4	60.9	16.2	12.2	20.6	4.4	0.05552	0.044683		48.5	17.6	24.7	6.7	45.8	150.1	78.4	16.7	24.7	24.1	4	0.0249	0.0188527		0.916584	4.2		gb:AY339373.1 DB_XREF=gi:33440013 TID=Os.11164.1 CNT=49 FEA=FLmRNA TIER=FL+Stack STK=15 UG=Os.11164 DEF=Oryza sativa (japonica cultivar-group) Prb1 mRNA, complete cds. PROD=Prb1 FL=gb:AK060057.1 gb:AY339373.1 REP_ORG=O. sativa	LOC_Os07g03458		unspliced-genomic pathogenesis-related protein 1 precursor, putative, expressed		AT3G19690	3e-34	257077_at
Os.12767.1.S1_a_at	137	1066.2	33599.1	41754.6	3347	631.3	528.9	1774.5	33554.3	35991.7	18.8	0.00254	0.00967625		127.5	3249.7	34408.9	35298.1	2208.7	384.2	144.6	1575	31533.4	32147.9	18.4	0.00211	0.00752371		0.994194	18.6		gb:AB110170.1 DB_XREF=gi:32352137 TID=Os.12767.1 CNT=52 FEA=FLmRNA TIER=FL+Stack STK=15 UG=Os.12767 DEF=Oryza sativa (japonica cultivar-group) mRNA for thiamine biosynthetic enzyme, complete cds, clone: 12YPR001. PROD=thiamine biosynthetic enzyme	LOC_Os07g34570		unspliced-genomic thiazole biosynthetic enzyme 1-1, chloroplast precursor, putative, expressed		AT5G54770	7e-143	248128_at
Os.12679.1.A1_a_at	15139.3	14084.8	9954.7	5440.3	8113.6	6002	10222.3	11898.7	9047.2	7101.5	10.8	0.01667	0.0210336		17190.9	16971.4	12238.9	7465.5	10224.8	6513.5	13298.2	15536.4	10119.7	8433.3	10.8	0.01405	0.00979958		0.97959	10.8		gb:AB018443.1 DB_XREF=gi:6006309 GEN=Osnph1b TID=Os.12679.1 CNT=43 FEA=FLmRNA TIER=FL+Stack STK=15 UG=Os.12679 DEF=Oryza sativa (japonica cultivar-group) mRNA for nonphototrophic hypocotyl 1b, complete cds. PROD=nonphototrophic hypocotyl 1b FL=	LOC_Os04g23890		unspliced-genomic phototropin-1, putative, expressed		AT5G58140	0	247853_at
Os.8445.1.S1_at	2036.7	1950.8	1329.3	1339.9	1758.4	1787.2	2130.6	1829	1285.8	1522.1	6.8	0.00222	0.0122482		2948	2318.7	1600.1	1836	1927	1879.1	2703.4	2103.6	1735.8	1970.1	7.6	0.03619	0.0348056		0.853851	7.2		gb:AY323129.1 DB_XREF=gi:32493109 GEN=RHF TID=Os.8445.1 CNT=47 FEA=FLmRNA TIER=FL+Stack STK=14 UG=Os.8445 DEF=Oryza sativa (japonica cultivar-group) putative RING-H2 zinc finger protein (RHF) mRNA, complete cds. PROD=putative RING-H2 zinc finger	LOC_Os11g36430		unspliced-genomic zinc finger, RING-type, putative, expressed		AT5G22000	1e-99	245684_at
Os.7.1.S1_a_at	3308.4	4122	7438.4	8312.8	6143.9	5171.8	3290.4	4094.9	7022.9	7959.7	20	4e-05	0.00176463		1908.4	2585.2	5286.1	6615	4863.5	4538.5	2559.4	3268.8	5832.1	6241.5	20.4	0.00024	0.00319945		0.973569	20.2		gb:D12632.1 DB_XREF=gi:391874 TID=Os.7.1 CNT=27 FEA=FLmRNA TIER=FL+Stack STK=14 UG=Os.7 DEF=Oryza sativa (japonica cultivar-group) mRNA for 40S subunit ribosomal protein, complete cds. PROD=40S subunit ribosomal protein FL=gb:AK120319.1 gb:AK062	LOC_Os06g04290		unspliced-genomic 40S ribosomal protein S20, putative, expressed		AT5G62300	1e-50	252601_s_at
Os.7.1.S1_x_at	4326.8	6097	9698.4	11476.7	7906.1	6684	4425.9	5349.7	7789.2	9815.7	20	0.00035	0.0013783		2724.9	3750.7	7495.3	9010.4	7039.9	6202.2	3964.5	4960.9	8767.2	9162.6	20.4	0.0003	0.00279989		0.896092	20.2		gb:D12632.1 DB_XREF=gi:391874 TID=Os.7.1 CNT=27 FEA=FLmRNA TIER=FL+Stack STK=14 UG=Os.7 DEF=Oryza sativa (japonica cultivar-group) mRNA for 40S subunit ribosomal protein, complete cds. PROD=40S subunit ribosomal protein FL=gb:AK120319.1 gb:AK062	LOC_Os06g04290		unspliced-genomic 40S ribosomal protein S20, putative, expressed		AT5G62300	1e-50	252601_s_at
Os.6239.1.S1_at	9148.3	19310.1	13240.2	5680.1	5401.8	4294.3	5861.2	22807.6	15817	6386.7	13.2	0.00662	0.0107699		11985.7	22116.5	18117.9	7085	5993.2	4373.6	6481.8	24133.7	16355.7	6361.4	13.2	0.00308	0.00626892		0.980756	13.2		gb:D85764.1 DB_XREF=gi:4666286 TID=Os.6239.1 CNT=47 FEA=FLmRNA TIER=FL+Stack STK=14 UG=Os.6239 DEF=Oryza sativa (japonica cultivar-group) mRNA for cytosolic monodehydroascorbate reductase, complete cds. PROD=cytosolic monodehydroascorbate reducta	LOC_Os09g39380		unspliced-genomic monodehydroascorbate reductase, putative, expressed		AT3G52880	0	252024_at
Os.4185.1.A1_at	3105.7	2805.4	3812	5563.5	4704.1	2110.4	1032.5	2721.4	4049.6	5766.6	20.4	0.00209	0.00889301		2002.7	2023.6	3324.3	5270.1	3582	1204.8	635.6	1812.9	2577.3	4136.2	20	0.00274	0.00451799		0.956289	20.2		gb:AB028132.1 DB_XREF=gi:4996645 TID=Os.4185.1 CNT=23 FEA=FLmRNA TIER=FL+Stack STK=14 UG=Os.4185 DEF=Oryza sativa mRNA for Dof zinc finger protein, complete cds. PROD=Dof zinc finger protein FL=gb:AB028132.1 gb:AK100892.1 gb:AK101321.1 gb:AK0610	LOC_Os02g49440	C2C2-Dof	unspliced-genomic expressed protein		AT5G60850	8e-29	247601_at
Os.4157.1.S1_at	34531.6	44432.2	40250.3	40667.5	32716	26709.4	33748	45132	39442.4	32139.6	14.4	0.01008	0.00614688		36161.2	38132.4	41471.7	31363.2	27576.5	22481.5	25748.4	38097.7	36825.9	27958.2	14	0.00779	0.00307205		0.827838	14.2		gb:L29470.1 DB_XREF=gi:600768 GEN=Cyp2 TID=Os.4157.1 CNT=207 FEA=FLmRNA TIER=FL+Stack STK=13 UG=Os.4157 DEF=Oryza sativa cyclophilin 2 (Cyp2) mRNA, complete cds. PROD=cyclophilin 2 FL=gb:AK061894.1 gb:AK098919.1 gb:L29470.1 REP_ORG=O. sativa	LOC_Os02g02890		unspliced-genomic peptidyl-prolyl cis-trans isomerase, putative, expressed		AT2G21130	2e-70	264019_at
Os.4157.1.S1_s_at	32520.3	39200.8	34440.4	35951.3	33781.4	26612.7	31892.8	38132	34301.7	31729.6	14.4	0.08061	0.0362267		35178.5	35851.4	33936.3	30833.5	27539.7	24036	29599	33987.3	32366.2	27562.4	13.2	0.01141	0.00248909		0.772432	13.8		gb:L29470.1 DB_XREF=gi:600768 GEN=Cyp2 TID=Os.4157.1 CNT=207 FEA=FLmRNA TIER=FL+Stack STK=13 UG=Os.4157 DEF=Oryza sativa cyclophilin 2 (Cyp2) mRNA, complete cds. PROD=cyclophilin 2 FL=gb:AK061894.1 gb:AK098919.1 gb:L29470.1 REP_ORG=O. sativa	LOC_Os02g02890		unspliced-genomic peptidyl-prolyl cis-trans isomerase, putative, expressed		AT2G21130	2e-70	264019_at
Os.2914.1.S1_at	35580.3	27665.1	7462.2	452.2	538.4	1960.2	32527.8	27111.1	9821.2	660.7	10	0.00096	0.00319279		42169.4	28447.5	7374.7	373.6	592.8	2297	35177.2	25804.5	6529.2	403.9	9.6	0.00217	0.00408108		0.991384	9.8		gb:AY026039.1 DB_XREF=gi:12829951 TID=Os.2914.1 CNT=62 FEA=FLmRNA TIER=FL+Stack STK=13 UG=Os.2914 DEF=Oryza sativa subsp. indica pyruvate dehydrogenase kinase 1 mRNA, complete cds. PROD=pyruvate dehydrogenase kinase 1 FL=gb:AK069157.1 gb:AY02603	LOC_Os07g44330		unspliced-genomic protein kinase, mitochondrial precursor, putative, expressed		AT3G06483	4e-155	258902_at
Os.12683.1.S1_at	4167.1	3208.5	2372.7	2455.3	2576.9	2481.6	3642.2	3668.9	2502.5	2514.9	8.8	0.01413	0.010987		4430.1	3246.7	2647.8	2722.3	3047.8	2573.2	4099.1	3626.9	2786.6	2525.4	8.4	0.02845	0.0202174		0.963594	8.6		gb:AF216317.1 DB_XREF=gi:11869996 TID=Os.12683.1 CNT=42 FEA=FLmRNA TIER=FL+Stack STK=13 UG=Os.12683 DEF=Oryza sativa MAP kinase 3 mRNA, complete cds. PROD=MAP kinase 3 FL=gb:AF216317.1 gb:AK119650.1 gb:AF241166.1 REP_ORG=O. sativa	LOC_Os02g05480		unspliced-genomic OsMPK14 - putative MAPK based on amino acid sequence homology, expressed		AT1G10210	6e-179	264405_at
Os.28384.1.S1_at	27706.5	19724.7	20016	23702.5	28478.3	26520.7	34009.3	19753.4	20246.2	21010.5	4	0.02187	0.0194117		31217.1	19268.9	18155.7	21917.5	26253.2	26419.6	29485.4	18002.6	18087	20590.7	4.4	0.00466	0.0117268		0.912531	4.2		gb:AK060008.1 DB_XREF=gi:32970026 TID=Os.28384.1 CNT=435 FEA=FLmRNA TIER=FL+Stack STK=12 UG=Os.28384 UG_TITLE=(japonica cultivar-group) cDNA clone:006-309-A12, full insert sequence DEF=Oryza sativa (japonica cultivar-group) cDNA clone:006-302-C08	LOC_Os06g41010		unspliced-genomic zinc finger A20 and AN1 domains-containing protein, putative, expressed		AT1G51200	1e-52	265150_at
Os.37752.1.S1_at	35547.1	26887.1	15474.3	6622.5	9834.4	5829.3	27897.2	28777.1	16038.2	7184.8	10.4	0.00276	0.00341099		32574	26131.7	14806.1	5917.6	6525.7	5635.4	23087.5	24949.8	10885.4	6422.3	10.4	0.00241	0.00266308		0.986357	10.4		gb:AF022737.1 DB_XREF=gi:2570508 TID=Os.37752.1 CNT=464 FEA=FLmRNA TIER=FL+Stack STK=12 UG=Os.37752 DEF=Oryza sativa transmembrane protein mRNA, complete cds. PROD=transmembrane protein FL=gb:AB009665.1 gb:AF022737.1 gb:AK061769.1 gb:AK103807.1	LOC_Os02g44630		unspliced-genomic aquaporin PIP1.1, putative, expressed		AT4G00430	9e-52	255674_at
Os.156.1.S1_at	1493.8	1546.5	2767.7	5588.7	2828.3	2682.1	1373.9	2894.2	3435.7	4299.7	20.4	0.00864	0.023382		1229.4	1762.4	2323.3	4213.4	2548.5	2095.1	1134.2	2212.4	3138.1	4602.1	20	0.00194	0.00646823		0.93603	20.2		gb:D26484.1 DB_XREF=gi:516838 TID=Os.156.1 CNT=80 FEA=FLmRNA TIER=FL+Stack STK=12 UG=Os.156 DEF=Oryza sativa (japonica cultivar-group) mRNA for catalase, complete cds. PROD=catalase FL=gb:AK100019.1 gb:AK069446.1 gb:D26484.1 REP_ORG=O. sativa	LOC_Os06g51150		unspliced-genomic catalase isozyme B, putative, expressed		AT4G35090	0	253174_at
Os.12296.1.S1_at	40994.9	46680.7	40166.7	9628.8	548.4	494.4	9285	40726.8	36843	12618.4	13.2	0.00256	0.00139453		44892.2	41658.5	40191.4	10105.5	364.6	205.6	11275.6	33277.6	33480.5	10209.5	12.8	0.00762	0.00124681		0.984453	13		gb:AF061577.1 DB_XREF=gi:3126853 GEN=RCABP89 TID=Os.12296.1 CNT=200 FEA=FLmRNA TIER=FL+Stack STK=11 UG=Os.12296 DEF=Oryza sativa chlorophyll ab binding protein (RCABP89) mRNA, nuclear gene encoding chloroplast protein, complete cds. PROD=chlorop	LOC_Os03g39610		unspliced-genomic chlorophyll a-b binding protein, chloroplast precursor, putative, expressed		AT2G05100	4e-134	263345_s_at
Os.12366.1.S1_a_at	31017.1	33178.9	16478.8	1328.9	1332.1	1046.6	7676.8	36022.4	21714.9	2676.9	12	0.00466	0.00431908		33472.8	31658.6	19573	988.2	727.8	694.3	5707.3	32991.9	19325.7	703.3	12	0.00758	0.00373158		0.990149	12		gb:AK104123.1 DB_XREF=gi:32989332 TID=Os.12366.1 CNT=128 FEA=FLmRNA TIER=FL+Stack STK=11 UG=Os.12366 UG_TITLE=Rice mRNA for gamma-Tip, complete cds DEF=Oryza sativa (japonica cultivar-group) cDNA clone:006-203-C12, full insert sequence. FL=gb:AK	LOC_Os03g05290		unspliced-genomic aquaporin TIP1.1, putative, expressed		AT2G36830	1e-92	263867_at
Os.12366.1.S1_x_at	21526.8	23748.2	9412.9	822.6	688.5	533.8	2877.9	25277.2	14432.8	1256	12	0.01111	0.00713923		19024.8	24817.5	6972.7	578.1	467.2	308	2308.4	26532.9	7702.2	426.4	11.6	0.02002	0.0154335		0.975586	11.8		gb:AK104123.1 DB_XREF=gi:32989332 TID=Os.12366.1 CNT=128 FEA=FLmRNA TIER=FL+Stack STK=11 UG=Os.12366 UG_TITLE=Rice mRNA for gamma-Tip, complete cds DEF=Oryza sativa (japonica cultivar-group) cDNA clone:006-203-C12, full insert sequence. FL=gb:AK	LOC_Os03g05290		unspliced-genomic aquaporin TIP1.1, putative, expressed		AT2G36830	1e-92	263867_at
Os.3405.1.S1_at	10145	7569.9	9842.2	10672.7	12836.2	14164.1	15162.1	7227.3	9769.5	9374.4	2.8	0.04153	0.0166317		10281.6	6009	8482.1	9330.3	12366.9	12260	14191.9	6946.4	7749	9201.5	2.8	0.01585	0.0111261		0.957805	2.8		gb:AB004660.1 DB_XREF=gi:3273242 TID=Os.3405.1 CNT=75 FEA=FLmRNA TIER=FL+Stack STK=11 UG=Os.3405 DEF=Oryza sativa mRNA for NLS receptor, complete cds. PROD=NLS receptor FL=gb:AB004660.1 gb:AK068233.1 gb:AK099336.1 gb:AF005265.1 REP_ORG=O. sativ	LOC_Os01g14950		unspliced-genomic importin alpha-1b subunit, putative, expressed		AT3G06720	0	258531_at
Os.5894.1.S1_at	13997	13842	9926.4	6581.5	7263.6	5559.4	11184	11834.7	8706.9	7315	10.8	0.0069	0.00429137		15843.9	13038.4	9417	6809.4	7488.8	5810.7	11268.9	12632.3	9177.1	7063	10.4	0.01122	0.00331053		0.975414	10.6		gb:AF455812.1 DB_XREF=gi:17981608 TID=Os.5894.1 CNT=74 FEA=FLmRNA TIER=FL+Stack STK=11 UG=Os.5894 DEF=Oryza sativa phosphoglucomutase mRNA, complete cds. PROD=phosphoglucomutase FL=gb:AK062105.1 gb:AF455812.1 gb:AK099746.1 gb:AK072313.1 REP_ORG	LOC_Os03g50480		unspliced-genomic phosphoglucomutase, cytoplasmic 2, putative, expressed		AT1G23190	0	264903_at
Os.14721.1.S1_at	14248.9	14230.2	6427.7	4262.4	5639.5	4792.7	13541.1	14846.8	7032.4	4529.9	10	0.00144	0.00549534		19527.4	16327.6	10449.6	4295.1	5270.8	5213.6	14212.5	16375.2	8087	4562.3	10.4	0.00106	0.00200136		0.960237	10.2		gb:AK103563.1 DB_XREF=gi:32988772 TID=Os.14721.1 CNT=49 FEA=FLmRNA TIER=FL+Stack STK=11 UG=Os.14721 UG_TITLE=Glyoxalase II (GLXII) mRNA, complete cds DEF=Oryza sativa (japonica cultivar-group) cDNA clone:J033132K06, full insert sequence. FL=gb:A	LOC_Os09g34100		unspliced-genomic hydroxyacylglutathione hydrolase 2, mitochondrial precursor, putative, expressed		AT1G06130	2e-116	260954_at
Os.26695.1.S1_at	3853.4	14623.8	1274	647.8	2419.4	13886.1	12601.6	8459.7	3581.7	571.8	8	0.05254	0.0400687		5211	14585.5	2201.4	476.3	1372.4	9150.6	9744.3	8762.3	3979.3	391.9	9.2	0.01924	0.0255738		0.950933	8.6		gb:AY596808.1 DB_XREF=gi:46849873 GEN=NAC TID=Os.26695.1 CNT=55 FEA=FLmRNA TIER=FL+Stack STK=11 UG=Os.26695 DEF=Oryza sativa (japonica cultivar-group) NAC transcription factor (NAC) mRNA, complete cds. PROD=NAC transcription factor FL=gb:AK1045	LOC_Os03g60080	NAC	unspliced-genomic NAC domain-containing protein 67, putative, expressed		AT5G63790	8e-66	247351_at
Os.12492.1.S1_at	12507	7000.9	2671.6	858.2	931.4	1336.3	8680.1	6534.2	2606.5	735.3	9.2	0.00591	0.00484831		12914.8	5647.8	2343.3	703.4	845.4	1151.8	8064.5	4916.1	2039.6	499.4	8.8	0.01741	0.00937806		0.988868	9		gb:D16499.1 DB_XREF=gi:415314 GEN=ME6 TID=Os.12492.1 CNT=54 FEA=FLmRNA TIER=FL+Stack STK=11 UG=Os.12492 DEF=Rice mRNA for NADP dependent malic enzyme, complete cds. PROD=NADP-dependent malic enzyme FL=gb:AK072842.1 gb:AK121770.1 gb:D16499.1 gb:	LOC_Os01g09320		unspliced-genomic NADP-dependent malic enzyme, chloroplast precursor, putative, expressed		AT1G79750	0	261355_at
Os.37893.1.S1_at	435.4	712.8	406.3	130.1	276.1	383.8	513.9	647.4	462.7	272.2	10.8	0.00307	0.00907713		356	570.7	319.6	335.5	274.9	483	513	531.6	322.7	215.3	9.2	0.02986	0.027095		0.774729	10		gb:AK100346.1 DB_XREF=gi:32985555 TID=Os.37893.1 CNT=41 FEA=FLmRNA TIER=FL+Stack STK=11 UG=Os.37893 UG_TITLE=(japonica cultivar-group) isolate 24080 phenylalanine ammonia-lyase mRNA, complete cds DEF=Oryza sativa (japonica cultivar-group) cDNA cl	LOC_Os04g43760		unspliced-genomic phenylalanine ammonia-lyase, putative, expressed		AT2G37040	0	263845_at
Os.12738.1.S2_a_at	485.7	470.4	310.8	2042.8	1341.9	1245.9	451.4	581.1	361.9	1285.9	23.6	0.0162	0.018196		468.3	464.4	274.2	1587.5	1223.5	1273.3	528.3	435.4	398.3	1455.4	23.6	0.0045	0.010795		0.960652	23.6		gb:AB008845.1 DB_XREF=gi:4008155 TID=Os.12738.1 CNT=36 FEA=FLmRNA TIER=FL+Stack STK=11 UG=Os.12738 DEF=Oryza sativa mRNA for NADH dependent Glutamate Synthase, complete cds. PROD=NADH dependent Glutamate Synthase FL=gb:AK105755.1 gb:AB008845.1	LOC_Os01g48960		unspliced-genomic glutamate synthase, chloroplast precursor, putative, expressed		AT5G53460	0	248267_at
Os.5012.1.S1_at	988.9	1066.9	339.6	312	343.4	379.8	1038.6	976	472.1	501.2	10	0.00625	0.0106836		1295.4	1208.8	442.7	492.8	338.1	350.6	1292.2	1577.4	456.5	657	10.4	0.01948	0.018155		0.953706	10.2		gb:AB037421.1 DB_XREF=gi:8574436 GEN=ALDH1a TID=Os.5012.1 CNT=20 FEA=FLmRNA TIER=FL+Stack STK=11 UG=Os.5012 DEF=Oryza sativa (japonica cultivar-group) ALDH1a mRNA for cytosolic aldehyde dehydrogenase, complete cds. PROD=cytosolic aldehyde dehydr	LOC_Os01g40860		unspliced-genomic retinal dehydrogenase 1, putative, expressed		AT3G24503	0	258140_at
Os.22723.1.S1_a_at	23723.9	21457.7	15550.5	18133.6	19293.3	20735.9	24655.1	23471	18194.2	14060	7.6	0.00254	0.00291367		27587	21088.8	17540.1	16426.7	19496.7	22288.2	25593.2	22157.9	17400.6	16443.5	7.2	7e-05	0.0051709		0.887364	7.4		gb:AK119682.1 DB_XREF=gi:37989305 TID=Os.22723.1 CNT=244 FEA=FLmRNA TIER=FL+Stack STK=10 UG=Os.22723 UG_TITLE=Elicitor and UV light related transcription factor (Elr) mRNA, complete cds DEF=Oryza sativa (japonica cultivar-group) cDNA clone:002-15	LOC_Os04g57220		unspliced-genomic ubiquitin-conjugating enzyme E2-17 kDa, putative, expressed		AT1G64230	1e-83	262341_at
Os.12171.1.S1_at	20380.1	21010.9	21201.4	19592.3	15095.7	13610.8	18990	24507.9	21916.8	17242.2	13.6	0.00126	0.00435164		19400.7	24863.8	21368.5	23197.4	17672.4	15197.4	17555.7	22935.8	22830.9	16213.5	14.4	0.02952	0.0100576		0.805359	14		gb:AK104691.1 DB_XREF=gi:32989900 TID=Os.12171.1 CNT=157 FEA=FLmRNA TIER=FL+Stack STK=10 UG=Os.12171 UG_TITLE=(japonica cultivar-group) cytoplasmic malate dehydrogenase (OSJNBa0055P24.3), mRNA DEF=Oryza sativa (japonica cultivar-group) cDNA clone	LOC_Os10g33800		unspliced-genomic malate dehydrogenase, cytoplasmic, putative, expressed		AT5G43330	2e-167	249147_at
Os.12625.1.S1_a_at	16385.7	20046.9	32229.2	36038.1	31785.1	27013.9	22845.4	18965.6	29637.6	33608.5	21.2	0.00041	0.00161973		12472.1	16948.7	31443.7	35506.3	30153.2	27117.2	23109.7	21139.4	28774.1	29552	21.2	0.00806	0.0206459		0.960436	21.2		gb:AK103738.1 DB_XREF=gi:32988947 TID=Os.12625.1 CNT=179 FEA=FLmRNA TIER=FL+Stack STK=10 UG=Os.12625 UG_TITLE=(japonica cultivar-group) putative plastidic ATPADP-transporter (P0707D10.36), mRNA DEF=Oryza sativa (japonica cultivar-group) cDNA clon	LOC_Os03g08060		unspliced-genomic elongation factor 1-alpha, putative, expressed		AT5G60390	0	247644_s_at
Os.12625.1.S1_x_at	16790	21630.1	31687.3	35273.9	31969.5	26853.1	25395.3	21454.9	28199.6	31493.8	21.2	0.00262	0.00221237		12874.4	19452.7	31794.7	33182	29397.2	26627.2	23368.9	21149.2	28710.6	28412.6	20.8	0.01284	0.00939925		0.972094	21		gb:AK103738.1 DB_XREF=gi:32988947 TID=Os.12625.1 CNT=179 FEA=FLmRNA TIER=FL+Stack STK=10 UG=Os.12625 UG_TITLE=(japonica cultivar-group) putative plastidic ATPADP-transporter (P0707D10.36), mRNA DEF=Oryza sativa (japonica cultivar-group) cDNA clon	LOC_Os03g08060		unspliced-genomic elongation factor 1-alpha, putative, expressed		AT5G60390	0	247644_s_at
Os.12349.1.S1_at	2777.7	2607	2968.7	3226.2	2491.4	2173.1	2356.2	3323.4	3451.1	2939.5	16	0.0198	0.0232867		2252.4	2993.9	3869	5373.6	2506	2655.8	2082.6	3094.2	3872.7	2720.8	18	0.06897	0.0211828		0.654168	17		gb:AK100908.1 DB_XREF=gi:32986117 TID=Os.12349.1 CNT=82 FEA=FLmRNA TIER=FL+Stack STK=10 UG=Os.12349 UG_TITLE=(japonica cultivar-group) UXS-3 mRNA for UDP-glucuronic acid decarboxylase, complete cds DEF=Oryza sativa (japonica cultivar-group) cDNA	LOC_Os03g16980		unspliced-genomic UDP-glucuronic acid decarboxylase 1, putative, expressed		AT2G28760	7e-172	266221_at
Os.10184.1.S1_s_at	5821	5634.3	5470.3	5802.7	4144.2	3862.2	3354.9	5569.9	6082.3	6305	16.4	0.05734	0.0406099		4052.5	4591.3	4396.3	5460.4	3681	3172.6	3211.8	5065.4	5050.4	5093	16.8	0.01209	0.0193191		0.883358	16.6		gb:AB110192.1 DB_XREF=gi:32352181 TID=Os.10184.1 CNT=41 FEA=FLmRNA TIER=FL+Stack STK=10 UG=Os.10184 UG_TITLE=(japonica cultivar-group) mRNA for hypothetical protein, complete cds, clone: 21C4BG001 DEF=Oryza sativa (japonica cultivar-group) mRNA f	LOC_Os06g12580		unspliced-genomic pro-resilin precursor, putative, expressed		AT1G11440	1e-14	261871_at
Os.3708.1.S1_at	3444.4	3855.3	3573.9	3416.9	3029.1	3263.6	2773.6	4564.7	5403.6	4051.7	15.2	0.09011	0.0260253		3322	4142.3	4806.3	4423	3379.7	2875.8	2908.1	5646.6	6453.2	3954.6	15.6	0.01013	0.0100325		0.897395	15.4		gb:AB026565.1 DB_XREF=gi:8671505 GEN=OsPBC1 TID=Os.3708.1 CNT=30 FEA=FLmRNA TIER=FL+Stack STK=10 UG=Os.3708 DEF=Oryza sativa (japonica cultivar-group) OsPBC1 mRNA for beta 3 subunit of 20S proteasome, complete cds. PROD=beta 3 subunit of 20S pro	LOC_Os06g43570		unspliced-genomic proteasome subunit beta type 3, putative, expressed		AT1G21720	1e-102	262497_at
Os.5851.1.S1_at	4310.1	4009.5	4395.1	5064.4	8456.7	10003.5	5063.9	3819.5	4034	5673.8	1.6	0.00412	0.00627702		3174.8	3588.1	3302.9	4862.2	7435.2	9491	5082.1	4081.9	3885.1	4506.5	2	0.01531	0.0063614		0.967352	1.8		gb:AK067649.1 DB_XREF=gi:32977667 TID=Os.5851.1 CNT=41 FEA=FLmRNA TIER=FL+Stack STK=10 UG=Os.5851 UG_TITLE=(japonica cultivar-group) cDNA clone:J013114G08, full insert sequence DEF=Oryza sativa (japonica cultivar-group) cDNA clone:J013114G08, ful	LOC_Os04g57400		unspliced-genomic methylthioribose kinase, putative, expressed		AT1G49820	9e-180	259819_at
Os.11387.1.S1_a_at	1247.3	741.9	679	809.1	1162	921.9	1784	722.2	616.2	808.7	4.8	0.07032	0.0485795		1619.3	760.7	782	1109	1451.2	1270.1	2175.3	792.9	846.3	1312.8	4	0.07818	0.0434248		0.955301	4.4		gb:AB154521.1 DB_XREF=gi:40217606 GEN=OsCIN4 TID=Os.11387.1 CNT=21 FEA=FLmRNA TIER=FL+Stack STK=10 UG=Os.11387 DEF=Oryza sativa (japonica cultivar-group) OsCIN4 mRNA for cell wall invertase, complete cds. PROD=cell wall invertase FL=gb:AK067444	LOC_Os01g73580		unspliced-genomic beta-fructofuranosidase, insoluble isoenzyme 4 precursor, putative, expressed		AT3G13790	2e-161	256787_at
Os.12244.1.S1_at	1994.4	5619	5392.9	1600.6	1269.1	1427.9	701.1	6145.5	5195	1224.8	14	0.00869	0.0128358		1836.6	8399.4	4740.4	1255.3	1094.3	1664.1	877.2	6463.8	5523.7	1222.8	13.6	0.0184	0.0180367		0.948482	13.8		gb:AB110191.1 DB_XREF=gi:32352179 TID=Os.12244.1 CNT=204 FEA=FLmRNA TIER=FL+Stack STK=9 UG=Os.12244 DEF=Oryza sativa (japonica cultivar-group) mRNA for heat shock protein 18, complete cds, clone: 21C4AB003. PROD=heat shock protein 18 FL=gb:AK119	LOC_Os03g15960		unspliced-genomic 17.4 kDa class I heat shock protein 3, putative, expressed		AT3G46230	1e-54	252515_at
Os.8629.1.S1_x_at	25405.3	23390	19627.6	16225.6	14786.3	19826.9	20855.9	24709.7	22174.7	20501.3	11.2	0.01062	0.0158588		26019.6	20293.5	15768.6	19223.6	19539	16953.5	22205	23060	19511.6	17497.6	8.8	0.12922	0.0469967		0.582127	10		gb:AF017360.1 DB_XREF=gi:2407274 TID=Os.8629.1 CNT=93 FEA=FLmRNA TIER=FL+Stack STK=9 UG=Os.8629 DEF=Oryza sativa lipid transfer protein LPT III mRNA, complete cds. PROD=lipid transfer protein LPT III FL=gb:AK059808.1 gb:U77295.1 gb:AF017360.1 R	LOC_Os12g02320		unspliced-genomic nonspecific lipid-transfer protein 1 precursor, putative, expressed		AT2G38540	6e-13	266421_at
Os.9729.1.S1_a_at	3755.3	3063.5	4557.1	5972	4960.5	4551.8	3247.3	4252.6	4909.1	5790.6	21.2	0.00146	0.0100014		3351.8	3045.2	4364.6	5628.6	4741.6	3770.5	3332.9	4191.6	5919.4	6873.3	20	0.00547	0.0198647		0.89181	20.6		gb:AF442962.1 DB_XREF=gi:17105222 TID=Os.9729.1 CNT=62 FEA=FLmRNA TIER=FL+Stack STK=9 UG=Os.9729 DEF=Oryza sativa peroxisomal multifunctional protein mRNA, complete cds. PROD=peroxisomal multifunctional protein FL=gb:AK061665.1 gb:AK073294.1 gb:	LOC_Os02g17390		unspliced-genomic peroxisomal fatty acid beta-oxidation multifunctional protein, putative, expressed		AT4G29010	0	253759_at
Os.7840.1.S1_at	6240.2	3842.8	3382.4	4791.8	6148.9	6723.8	6875.4	4146.9	3408.2	4296.8	4	7e-05	0.00165268		7735	3895	3765.9	4610.8	5837.7	6356.8	7520	3890.4	3816.4	4525.6	4.4	0.00491	0.0128705		0.931788	4.2		gb:AK066832.1 DB_XREF=gi:32976850 TID=Os.7840.1 CNT=38 FEA=FLmRNA TIER=FL+Stack STK=9 UG=Os.7840 UG_TITLE=(japonica cultivar-group) unnamed protein product (Gene), mRNA DEF=Oryza sativa (japonica cultivar-group) cDNA clone:J013075A09, full insert	LOC_Os01g08970	HMG	unspliced-genomic structure-specific recognition protein 1, putative, expressed		AT3G28730	0	256590_at
Os.6961.1.S1_a_at	6906.9	21250.4	17251.4	13644.8	11838	9155.3	7208.7	8269.8	18068.7	13119	16.4	0.08212	0.030447		5043.8	15173.6	13641.5	14283.2	8671.3	7582.1	5069.6	5784	18194	11866.2	17.6	0.02468	0.0197646		0.922923	17		gb:AK061801.1 DB_XREF=gi:32971819 TID=Os.6961.1 CNT=28 FEA=FLmRNA TIER=FL+Stack STK=9 UG=Os.6961 UG_TITLE=(japonica cultivar-group) isolate 20462 senescence-associated protein-like protein mRNA, complete cds DEF=Oryza sativa (japonica cultivar-gr	LOC_Os09g25760		unspliced-genomic senescence-associated protein DH, putative, expressed		AT2G23810	1e-80	267293_at
Os.1005.1.S1_at	13975.7	13024.5	8753.8	4789.1	7369.5	5810.9	11267.5	13636.3	7701.8	5760.5	10.4	0.00278	0.005582		19388.3	13853.9	9479.5	5184	8109.4	5962.5	13412.8	13365.3	7871.4	6652.4	9.6	0.01409	0.00694759		0.948164	10		gb:AF367205.1 DB_XREF=gi:17225988 TID=Os.1005.1 CNT=36 FEA=FLmRNA TIER=FL+Stack STK=9 UG=Os.1005 DEF=Oryza sativa 1-deoxy-D-xylulose 5-phosphate reductoisomerase precursor, mRNA, complete cds; nuclear gene for plastid product. PROD=1-deoxy-D-xylu	LOC_Os01g01710		unspliced-genomic 1-deoxy-D-xylulose 5-phosphate reductoisomerase, chloroplast precursor, putative, expressed		AT5G62790	0	247401_at
Os.5599.1.S1_x_at	7737	10532.7	5353.9	4147.1	4728.5	4757.9	8739.9	6643.4	4666.9	4527.9	10	0.01814	0.0298328		7324.6	10668.3	5970.2	4261.6	4226.2	4605.1	6935.9	5016	3807.4	3636.8	10	0.08643	0.0444034		0.936356	10		gb:AK068312.1 DB_XREF=gi:32978330 TID=Os.5599.1 CNT=36 FEA=FLmRNA TIER=FL+Stack STK=9 UG=Os.5599 UG_TITLE=(japonica cultivar-group) AP2-domain DRE binding factor DBF1 mRNA, complete cds DEF=Oryza sativa (japonica cultivar-group) cDNA clone:J01315	LOC_Os08g31580	AP2-EREBP	unspliced-genomic DRE binding factor 1, putative, expressed		AT1G78080	7e-41	262135_at
Os.9416.1.S1_at	3179.5	6158.7	4759.7	2021.5	1408.9	845.7	1624.4	5737.3	4849.1	1850.6	13.6	0.00128	0.00365001		3103.9	4365.9	5165.8	2432.9	721.3	1132.5	1369.7	5092.1	4838.6	1492.6	14	0.001	0.00296787		0.94192	13.8		gb:AB073749.1 DB_XREF=gi:20196209 GEN=OsCIN1 TID=Os.9416.1 CNT=27 FEA=FLmRNA TIER=FL+Stack STK=9 UG=Os.9416 DEF=Oryza sativa (japonica cultivar-group) OsCIN1 mRNA for cell wall invertase, complete cds. PROD=cell wall invertase FL=gb:AB073749.1	LOC_Os02g33110		unspliced-genomic beta-fructofuranosidase, insoluble isoenzyme 1 precursor, putative, expressed		AT2G36190	2e-110	263905_at
Os.11442.1.S1_at	1816.7	1837.2	2085.4	2093.4	1726.4	1440.1	1366.7	2431.8	2228.3	2146.3	16.4	0.01856	0.0237469		1524.9	2595.5	1931.8	1884.4	1571.2	1382.8	1659.6	2538.2	2042.1	2114.8	14.4	0.02956	0.0237976		0.667799	15.4		gb:AB066560.1 DB_XREF=gi:29466963 GEN=ossap1 TID=Os.11442.1 CNT=27 FEA=FLmRNA TIER=FL+Stack STK=9 UG=Os.11442 DEF=Oryza sativa ossap1 gene for putative secretory acid phosphatase precursor, complete cds. PROD=putative secretory acid phosphatase	LOC_Os06g43640		unspliced-genomic purple acid phosphatase precursor, putative, expressed		AT5G34850	0	246636_at
Os.3340.1.S1_a_at	8715.8	5582.5	4803.3	999.8	2194.7	3810.4	8214.9	3952.2	2801.2	807.4	8.8	0.00366	0.00929258		8498.6	5597.2	3892.1	649.8	2458.4	3441.5	9689	4737.5	3000.3	862.1	8.8	0.00195	0.0078697		0.976849	8.8		gb:AK061946.1 DB_XREF=gi:32971964 TID=Os.3340.1 CNT=25 FEA=FLmRNA TIER=FL+Stack STK=9 UG=Os.3340 UG_TITLE=Putative transcription factor OsGLK1 (Glk1) mRNA, complete cds DEF=Oryza sativa (japonica cultivar-group) cDNA clone:001-042-E04, full inser	LOC_Os06g24070	G2-like	unspliced-genomic transcription factor ZmGLK1, putative, expressed		AT2G20570	4e-48	263715_at
Os.7909.1.S1_at	18541.6	24101	12080.8	5197.5	4171.1	6360.1	14234.1	25981.4	14493.8	5816	11.6	0.00039	0.00346296		15105.2	20606.6	13231.6	6401.7	3967.7	5281.5	10610.2	21068.2	11288.8	4665.9	12	0.00052	0.00321943		0.978749	11.8		gb:AK071969.1 DB_XREF=gi:32981992 TID=Os.7909.1 CNT=134 FEA=FLmRNA TIER=FL+Stack STK=8 UG=Os.7909 UG_TITLE=Shoot GS1 mRNA for cytosolic glutamine synthetase (EC 6.3.1.2) (clone lambda-GS28) DEF=Oryza sativa (japonica cultivar-group) cDNA clone:J0	LOC_Os02g50240		unspliced-genomic glutamine synthetase root isozyme 3, putative, expressed		AT5G37600	0	249581_at
Os.17959.1.S1_a_at	26768.5	21521.6	5823.2	1655.7	7504.3	12041.8	25276.8	19500.2	6301.7	2673.5	8.4	6e-05	0.00202484		33529.3	21667.7	8632.2	2579.9	9745.9	13365.6	31157.2	21771	7607.2	3261.5	8.4	0.00019	0.0022124		0.988559	8.4		gb:AF357884.1 DB_XREF=gi:19880026 TID=Os.17959.1 CNT=56 FEA=FLmRNA TIER=FL+Stack STK=8 UG=Os.17959 DEF=Oryza sativa glyceraldehyde-3-phosphate dehydrogenase mRNA, complete cds. PROD=glyceraldehyde-3-phosphate dehydrogenase FL=gb:AK062559.1 gb:AF	LOC_Os08g34210		unspliced-genomic NADP-dependent glyceraldehyde-3-phosphate dehydrogenase, putative, expressed		AT2G24270	0	265998_at
Os.2248.1.S1_at	40635.6	42293.7	33366.4	33157.6	33987.8	32948.1	39608.5	40607.1	32712.9	32672.4	9.6	0.0093	0.0176041		42959	42179.6	37743.8	33365.6	35348.5	31241.2	37057.3	37620.7	33231.5	30014.2	10.4	0.06254	0.0106928		0.835398	10		gb:AF093631.1 DB_XREF=gi:3885885 GEN=RISP TID=Os.2248.1 CNT=42 FEA=FLmRNA TIER=FL+Stack STK=8 UG=Os.2248 DEF=Oryza sativa Rieske Fe-S precursor protein (RISP) mRNA, complete cds. PROD=Rieske Fe-S precursor protein FL=gb:AK071634.1 gb:AF093631.1	LOC_Os07g37030		unspliced-genomic cytochrome b6-f complex iron-sulfur subunit, chloroplast precursor, putative, expressed		AT4G03280	6e-90	255435_at
Os.12331.1.S1_at	6524.3	5874.5	4589.6	4586.1	4535.2	4766.5	5426.3	6065.9	4274.6	4040.2	9.2	0.00735	0.00660686		5693.2	5259.2	4169.2	3905.9	4400.7	4125.3	5347.5	5717.3	3914.6	3601.1	9.2	0.0045	0.00894502		0.958758	9.2		gb:AY156510.1 DB_XREF=gi:27085277 GEN=DPK1 TID=Os.12331.1 CNT=30 FEA=FLmRNA TIER=FL+Stack STK=8 UG=Os.12331 DEF=Oryza sativa (japonica cultivar-group) serinethreonine protein kinase (DPK1) mRNA, complete cds. PROD=serinethreonine protein kinase	LOC_Os08g12750		unspliced-genomic serine/threonine protein kinase, putative, expressed		AT2G24360	5e-169	265661_at
Os.11756.1.S1_s_at	15727.9	16927.3	10458.4	10288.1	17215.6	16540.7	18044.8	16553.4	11904.6	13052.1	6	0.01682	0.0204043		19889.4	16525.3	11335.4	12678.4	18391.6	14528.1	17203.7	15874.4	11234.1	13681.9	5.6	0.04374	0.0434579		0.812955	5.8		gb:AK062233.1 DB_XREF=gi:32972251 TID=Os.11756.1 CNT=25 FEA=FLmRNA TIER=FL+Stack STK=8 UG=Os.11756 UG_TITLE=(japonica cultivar-group) fructose-1,6-bisphosphatase (OJ1364E02.13), mRNA DEF=Oryza sativa (japonica cultivar-group) cDNA clone:001-047-D	LOC_Os03g16050		unspliced-genomic fructose-1,6-bisphosphatase, chloroplast precursor, putative, expressed		AT3G54050	4e-171	251885_at
Os.2230.1.S1_at	1259	695.4	304.2	194.3	401.1	510.6	1138.8	1073.3	341	279.7	8.4	0.00194	0.00350438		1448.6	1078.8	222.3	126.5	295.9	363.3	672	1074.1	181.3	145.7	9.2	0.01092	0.00853668		0.884741	8.8		gb:AF056027.1 DB_XREF=gi:3377508 GEN=REH1 TID=Os.2230.1 CNT=28 FEA=FLmRNA TIER=FL+Stack STK=8 UG=Os.2230 DEF=Oryza sativa auxin transport protein REH1 (REH1) mRNA, complete cds. PROD=auxin transport protein REH1 FL=gb:AF056027.1 gb:AK102343.1 g	LOC_Os02g50960		unspliced-genomic auxin efflux carrier component 1, putative, expressed		AT1G73590	0	259845_at
Os.4704.1.S1_at	2051.4	1269.6	631.1	1497.7	2964.1	3050.1	2241.8	1107.1	750.3	1451	3.2	0	0.00081225		2380.6	1448.9	705	1201	2256	2494.3	1344.9	695.6	549.1	1377	3.2	0.00293	0.000838195		0.886664	3.2		gb:D87819.1 DB_XREF=gi:2723470 GEN=OsSUT1 TID=Os.4704.1 CNT=29 FEA=FLmRNA TIER=FL+Stack STK=8 UG=Os.4704 DEF=Oryza sativa (japonica cultivar-group) mRNA for sucrose transporter, complete cds. PROD=sucrose transporter FL=gb:AK109355.2 gb:AK10002	LOC_Os03g07480		unspliced-genomic sucrose Transporter, putative, expressed		AT2G02860	3e-168	266792_at
Os.22635.1.S1_s_at	1898.9	1537.9	842.8	572	527.9	575.4	961.2	1275.6	904.2	530.2	10.4	0.01536	0.0190207		1250	1059.8	1013.8	563.3	477.9	585.8	680.3	1533.2	850.4	553.4	12	0.01389	0.0150437		0.802996	11.2		gb:AK070803.1 DB_XREF=gi:32980826 TID=Os.22635.1 CNT=23 FEA=FLmRNA TIER=FL+Stack STK=8 UG=Os.22635 UG_TITLE=(japonica cultivar-group) unknown protein (OSJNBa0047G15.26), mRNA DEF=Oryza sativa (japonica cultivar-group) cDNA clone:J023069D21, full	LOC_Os10g10080		unspliced-genomic secondary cell wall-related glycosyltransferase family 47, putative, expressed		AT1G27440	0	264493_at
Os.22086.1.S1_at	5634.3	906.6	1249.8	7815.7	18060.4	14861	11055.3	781.7	510.7	4292.9	2.4	0.00034	0.000925359		3105.1	319.3	798	15301.8	13720.2	21175.7	9483.9	863.1	432.1	3707.5	2	0.00802	0.00260125		0.871877	2.2		gb:AF014467.1 DB_XREF=gi:2429285 GEN=POX22.3 TID=Os.22086.1 CNT=14 FEA=FLmRNA TIER=FL+Stack STK=8 UG=Os.22086 DEF=Oryza sativa peroxidase (POX22.3) mRNA, complete cds. PROD=peroxidase FL=gb:AK073202.1 gb:AK104710.1 gb:AF014467.1 gb:AK122028.1 g	LOC_Os07g48020		unspliced-genomic peroxidase 2 precursor, putative, expressed		AT5G05340	8e-103	250798_at
Os.27479.1.S1_at	988.9	1342.7	2112.3	1292.1	561.8	321.4	833.1	1135.1	1959.3	1352.6	15.6	0.00062	0.00308769		1299.2	1250.5	2005.5	1275.3	623.8	374.4	899.7	1269.5	1971.4	1417.6	15.6	0.00272	0.00453508		0.979006	15.6		gb:AK066168.1 DB_XREF=gi:32976186 TID=Os.27479.1 CNT=17 FEA=FLmRNA TIER=FL+Stack STK=8 UG=Os.27479 UG_TITLE=(japonica cultivar-group) cDNA clone:001-033-C09, full insert sequence DEF=Oryza sativa (japonica cultivar-group) cDNA clone:J013055J22, f	LOC_Os05g05590		unspliced-genomic sodium/hydrogen exchanger 2, putative, expressed		AT3G05030	0	259081_at
Os.3766.1.S1_at	950.5	540.6	667	186.1	558.1	2128.3	3142.8	1117.7	485.7	373.2	6.4	0.04899	0.0166827		977	854.4	641.2	374.9	687.6	2410.4	2988.3	819	442.1	200.9	6	0.02884	0.0161506		0.975788	6.2		gb:AK069262.1 DB_XREF=gi:32979286 TID=Os.3766.1 CNT=23 FEA=FLmRNA TIER=FL+Stack STK=8 UG=Os.3766 UG_TITLE=(japonica cultivar-group) ethylene-responsive element binding factor 3 (P0699H05.22), mRNA DEF=Oryza sativa (japonica cultivar-group) cDNA c	LOC_Os01g58420	AP2-EREBP	unspliced-genomic ethylene-responsive transcription factor 4, putative, expressed		AT3G15210	8e-19	257053_at
Os.12625.2.S1_x_at	21116.2	24780.3	33750.2	36449.7	32125.4	28576.5	25759.6	23930.9	30820.7	33412.3	20.8	0.00056	0.00186932		16385.7	20211.7	31767.2	33093.5	30694.4	28340.1	26016.2	23180.3	29771.8	29414.6	21.2	0.01871	0.00956777		0.940225	21		gb:D63583.1 DB_XREF=gi:2662346 TID=Os.12625.2 CNT=237 FEA=FLmRNA TIER=FL+Stack STK=7 UG=Os.12625 DEF=Oryza sativa mRNA for EF-1 alpha, complete cds. PROD=EF-1 alpha FL=gb:AK119537.1 gb:D63583.1 gb:AK061464.1 REP_ORG=O. sativa	LOC_Os03g08020		unspliced-genomic elongation factor 1-alpha, putative, expressed		AT5G60390	1e-171	247644_s_at
Os.12774.1.S1_at	12754.8	14593.6	21096.9	24329.6	19721.8	16558.9	14749.7	13374.7	20368.2	21851.1	20.4	0.00015	0.00233259		6694.1	8457	19607.9	23466.2	16747.8	15606.6	10696	12650.1	18982.1	20015.7	20.4	0.00149	0.00575127		0.950418	20.4		gb:D12633.1 DB_XREF=gi:303838 TID=Os.12774.1 CNT=84 FEA=FLmRNA TIER=FL+Stack STK=7 UG=Os.12774 DEF=Oryza sativa (japonica cultivar-group) mRNA for 40S subunit ribosomal protein, complete cds. PROD=40S subunit ribosomal protein FL=gb:AK104084.1 g	LOC_Os03g22460		unspliced-genomic expressed protein		AT5G27700	5e-25	246747_at
Os.11330.1.S1_a_at	23658.4	19591.3	12876.5	1065.8	5323.6	8363.3	20308.7	20231.4	14820.6	2899.1	10.4	7e-05	0.00109719		21423	20324.2	9960.6	1210	4609.5	7120.4	17841.1	20577.6	11197.2	1501.1	10	3e-05	0.00116491		0.983348	10.2		gb:AK103938.1 DB_XREF=gi:32989147 TID=Os.11330.1 CNT=73 FEA=FLmRNA TIER=FL+Stack STK=7 UG=Os.11330 UG_TITLE=(japonica cultivar-group) putative plasma membrane intrinsic protein (OJ1047_A06.17), mRNA DEF=Oryza sativa (japonica cultivar-group) cDNA	LOC_Os07g26690		unspliced-genomic aquaporin PIP2.1, putative, expressed		AT2G37170	7e-105	265444_s_at
Os.11330.1.S1_x_at	20050.6	17447.7	7060	755.1	2524.2	4692.8	15221.8	17401	9101.5	1949.7	10	0.0001	0.000965367		14967.3	15379.1	5498.4	685.6	2233.2	3809.4	11386.1	16694.6	5235.7	619	10.4	0.00025	0.00287421		0.978335	10.2		gb:AK103938.1 DB_XREF=gi:32989147 TID=Os.11330.1 CNT=73 FEA=FLmRNA TIER=FL+Stack STK=7 UG=Os.11330 UG_TITLE=(japonica cultivar-group) putative plasma membrane intrinsic protein (OJ1047_A06.17), mRNA DEF=Oryza sativa (japonica cultivar-group) cDNA	LOC_Os07g26690		unspliced-genomic aquaporin PIP2.1, putative, expressed		AT2G37170	7e-105	265444_s_at
Os.11330.1.S2_at	471	470.2	863.6	1840.7	395	92.7	231.4	431.5	709.4	1156.6	19.2	0.03329	0.0267718		297.1	292	654.9	801.1	232.6	36.3	214.3	257.3	653	1056.2	18.4	0.00896	0.00650455		0.847109	18.8		gb:AK105524.1 DB_XREF=gi:32990733 TID=Os.11330.1 CNT=73 FEA=FLmRNA TIER=FL STK=1 UG=Os.11330 UG_TITLE=(japonica cultivar-group) putative plasma membrane intrinsic protein (OJ1047_A06.17), mRNA DEF=Oryza sativa (japonica cultivar-group) cDNA clone	LOC_Os07g26690		unspliced-genomic aquaporin PIP2.1, putative, expressed		AT2G37170	7e-105	265444_s_at
Os.12283.1.S1_at	36287.3	40441.9	30553.4	24659.8	20982.4	19259.8	26665.8	29867.2	27717.1	27829.4	12.4	0.04103	0.00302203		36203.5	32437.8	30795.3	26904.6	25142	19745.2	28714.9	24456.9	25948.2	23509.5	11.6	0.2944	0.0357201		0.80593	12		gb:AK060493.1 DB_XREF=gi:32970511 TID=Os.12283.1 CNT=60 FEA=FLmRNA TIER=FL+Stack STK=7 UG=Os.12283 UG_TITLE=(japonica cultivar-group) photosystem-1 F subunit precursor (OSJNBa0010I09.4), mRNA DEF=Oryza sativa (japonica cultivar-group) cDNA clone:	LOC_Os03g56670		unspliced-genomic photosystem I reaction center subunit III, chloroplast precursor, putative, expressed		AT1G31330	6e-66	262557_at
Os.10894.1.S1_at	5125	3509.9	2020.8	1310.2	1782.8	2711.1	3369.7	3355.1	2195	1424.1	8.8	0.00144	0.00124856		3709.3	3158.8	1415.2	1213.1	1564	2189.2	2608.8	2570.4	1814.5	1084.7	8.8	0.00128	0.00151665		0.976912	8.8		gb:AK120180.1 DB_XREF=gi:37989803 TID=Os.10894.1 CNT=60 FEA=FLmRNA TIER=FL+Stack STK=7 UG=Os.10894 UG_TITLE=(japonica cultivar-group) beta-tubulin (OSJNBa0091J19.2), mRNA DEF=Oryza sativa (japonica cultivar-group) cDNA clone:J013033M18, full inse	LOC_Os03g56810		unspliced-genomic tubulin beta-7 chain, putative, expressed		AT5G23860	0	249818_at
Os.10894.1.S1_s_at	2879.5	1835.3	971.3	693.1	930.8	1721.4	2249.3	1836.4	916.3	891.9	8	0.00031	0.00614688		1710.4	1835.1	821.6	647.3	800	1274.6	1263.8	1256.5	807.6	502.5	8.8	0.00324	0.00593516		0.863617	8.4		gb:AK120180.1 DB_XREF=gi:37989803 TID=Os.10894.1 CNT=60 FEA=FLmRNA TIER=FL+Stack STK=7 UG=Os.10894 UG_TITLE=(japonica cultivar-group) beta-tubulin (OSJNBa0091J19.2), mRNA DEF=Oryza sativa (japonica cultivar-group) cDNA clone:J013033M18, full inse	LOC_Os03g56810		unspliced-genomic tubulin beta-7 chain, putative, expressed		AT5G23860	0	249818_at
Os.425.1.S1_s_at	1917	2016.9	1467.5	2295.1	2939.4	2747.6	2389	1244.5	1451.8	1940.8	2	0.00278	0.00477921		1466.5	1521.4	1197.5	1717.1	2302.7	1649	1791.5	1189.4	1603.7	1727.5	0.8	0.03772	0.0300347		0.822953	1.4		gb:AK066791.1 DB_XREF=gi:32976809 TID=Os.425.1 CNT=32 FEA=FLmRNA TIER=FL+Stack STK=7 UG=Os.425 UG_TITLE=(japonica cultivar-group) mRNA for UDP-glucuronyltransferase-l, complete cds DEF=Oryza sativa (japonica cultivar-group) cDNA clone:J013084K17,	LOC_Os06g47340		unspliced-genomic glycosyltransferase, putative, expressed		AT5G67230	2e-134	247031_at
Os.9253.1.S1_s_at	5934.6	6344.9	14504.5	14890	12546	12108.9	9739.1	6322.6	14397	14210.5	21.2	0.00939	0.0134347		3617.4	4792.3	14864.4	17909.7	13955.9	12486	8681.1	6698	13008	16097.3	21.2	0.0014	0.00267077		0.96378	21.2		gb:AK064936.1 DB_XREF=gi:32974954 TID=Os.9253.1 CNT=42 FEA=FLmRNA TIER=FL+Stack STK=7 UG=Os.9253 UG_TITLE=Rice (YK426) mRNA, complete cds DEF=Oryza sativa (japonica cultivar-group) cDNA clone:J013000P02, full insert sequence. FL=gb:D83527.1 gb:A	LOC_Os09g31180		unspliced-genomic 60S ribosomal protein L9, putative, expressed		AT1G33140	7e-65	261620_s_at
Os.12805.1.S1_at	31501.1	40313.2	32119.1	11230.8	2849.9	2850	10997.4	39892.7	32837	14159.4	13.2	0.00072	0.00147441		32830.7	37512.4	33327.1	10389.6	2086.9	2197	11687.6	35431	31151.9	14584.6	13.2	0.00091	0.0010202		0.99301	13.2		gb:AB001883.1 DB_XREF=gi:3618309 TID=Os.12805.1 CNT=31 FEA=FLmRNA TIER=FL+Stack STK=7 UG=Os.12805 DEF=Oryza sativa (japonica cultivar-group) mRNA for zinc finger protein, complete cds, clone:E10707. PROD=zinc finger protein FL=gb:AK061664.1 gb:A	LOC_Os04g41560	Orphans	unspliced-genomic salt tolerance-like protein, putative, expressed		AT1G06040	1e-43	260956_at
Os.4600.1.S1_at	8672.4	4650	4695.4	5989.6	7827.9	6140.6	9320.9	3962.7	3902	4899.3	4	0.04069	0.0354835		10588	5110.3	4676.8	6397.6	8225.3	7307.9	9284.1	4750.8	4007.2	5401.9	4.4	0.01484	0.0185746		0.965352	4.2		gb:AB098063.1 DB_XREF=gi:33354148 GEN=OsSPDS2 TID=Os.4600.1 CNT=39 FEA=FLmRNA TIER=FL+Stack STK=7 UG=Os.4600 DEF=Oryza sativa (japonica cultivar-group) OsSPDS2 mRNA for aminopropyl transferase, complete cds. PROD=aminopropyl transferase FL=gb:A	LOC_Os06g33710		unspliced-genomic spermidine synthase 1, putative, expressed		AT5G53120	2e-134	248248_at
Os.5480.1.S1_at	7690.9	5395.6	4652.3	5385.1	8663.5	10795.5	11391.8	6939.7	4549.7	4755.4	4.8	0.00138	0.00100683		7867.6	4906	4342.9	4935	7738.7	10103	9691.2	6255.5	4223.3	4670.2	4.8	0.00011	0.000779786		0.986018	4.8		gb:AK072675.1 DB_XREF=gi:32982698 TID=Os.5480.1 CNT=22 FEA=FLmRNA TIER=FL+Stack STK=7 UG=Os.5480 UG_TITLE=(japonica cultivar-group) OsCyp3 mRNA for cyclophilin, complete cds DEF=Oryza sativa (japonica cultivar-group) cDNA clone:J023135C15, full i	LOC_Os08g44520		unspliced-genomic peptidyl-prolyl cis-trans isomerase-like 1, putative, expressed		AT2G36130	2e-70	263288_at
Os.11992.1.S1_at	4940.2	3545	4113.4	5005.6	4938.1	6060.2	5442	4065.3	4079.7	4482.5	2.8	0.00635	0.00672071		4254.3	3748.1	4378.3	4596.5	5263	5410	5657.6	3566.7	3847.4	4944.4	2	0.02032	0.0141248		0.825719	2.4		gb:AK103366.1 DB_XREF=gi:32988575 TID=Os.11992.1 CNT=31 FEA=FLmRNA TIER=FL+Stack STK=7 UG=Os.11992 UG_TITLE=(japonica cultivar-group) RNase L inhibitor-like protein mRNA, complete cds DEF=Oryza sativa (japonica cultivar-group) cDNA clone:J033126O	LOC_Os11g34350		unspliced-genomic ATP-binding cassette sub-family E member 1, putative, expressed		AT4G19210	0	254615_at
Os.20028.1.S1_at	1542.1	1437.8	1104.6	1523.8	2054.4	2378.3	2143.6	1124.4	989.6	1478.3	3.2	0.00072	0.00361036		1717.6	1543.3	1206.1	1447.6	2240.4	2505.8	2428.9	1514.5	1282.5	1719.9	3.6	0.00141	0.0022124		0.961809	3.4		gb:AF459793.1 DB_XREF=gi:23305050 GEN=WRKY TID=Os.20028.1 CNT=22 FEA=FLmRNA TIER=FL+Stack STK=7 UG=Os.20028 DEF=Oryza sativa (indica cultivar-group) WRKY transcription factor (WRKY) mRNA, complete cds. PROD=WRKY transcription factor FL=gb:AF459	LOC_Os09g30400	WRKY	unspliced-genomic OsWRKY80 - Superfamily of rice TFs having WRKY and zinc finger domains, expressed		AT5G56270	4e-72	248008_at
Os.15700.1.S1_at	17537.2	9483.9	8470.8	9405.8	16198.4	15401.7	17967.9	6716	6033.4	10879.9	4	0.00251	0.00762436		22401.5	7726.6	6850.9	10472.6	19331.9	15315.2	18886.2	6354	6841.7	11143.3	3.6	0.00872	0.0112189		0.964029	3.8		gb:AF456329.1 DB_XREF=gi:18251458 TID=Os.15700.1 CNT=26 FEA=FLmRNA TIER=FL+Stack STK=7 UG=Os.15700 DEF=Oryza sativa fructose-6-phosphate-2-kinasefructose-2,6-bisphosphatase mRNA, complete cds. PROD=fructose-6-phosphate-2-kinasefructose-2,6-bispho	LOC_Os05g07130		unspliced-genomic fructose-6-phosphate-2-kinase/fructose-2, 6-bisphosphatase, putative, expressed		AT1G07110	0	256036_at
Os.10235.1.S1_at	4119.3	2902.2	1993.3	775.9	6.5	35.4	1799.6	3298.7	2400.9	592.6	11.6	0.00489	0.00165268		4736.7	2416	2576.2	681.8	27	75.3	1831.6	2853.8	2581.7	681	11.6	0.02542	0.00417925		0.970134	11.6		gb:AK119625.1 DB_XREF=gi:37989248 TID=Os.10235.1 CNT=23 FEA=FLmRNA TIER=FL+Stack STK=7 UG=Os.10235 UG_TITLE=(japonica cultivar-group) isolate 20587 AOBP-like protein mRNA, complete cds DEF=Oryza sativa (japonica cultivar-group) cDNA clone:002-117	LOC_Os07g48570	C2C2-Dof	unspliced-genomic expressed protein		AT5G39660	5e-73	249415_at
Os.10309.1.S1_at	3477.1	3723.6	3832.9	4701.7	4530.8	5535	4050.2	3271.3	3538.7	3577.7	1.6	0.04982	0.0345265		4340.7	3924.7	3875.4	3917.3	4811.5	5983.3	4325	3044	3633.4	3320.6	3.2	0.01759	0.014745		0.843027	2.4		gb:AK100527.1 DB_XREF=gi:32985736 TID=Os.10309.1 CNT=20 FEA=FLmRNA TIER=FL+Stack STK=7 UG=Os.10309 UG_TITLE=(japonica cultivar-group) cDNA clone:J023101D09, full insert sequence DEF=Oryza sativa (japonica cultivar-group) cDNA clone:J023101D09, fu	LOC_Os09g17730		unspliced-genomic proton pump interactor, putative, expressed		AT4G27500	2e-91	253868_at
Os.272.1.S1_at	662.4	653.6	944.1	1008.6	1581.8	995.6	841.8	733.5	785	1406.2	23.2	0.00416	0.0113977		703.8	545	954.4	1189.5	1535.5	1011.2	980.5	686.5	940.8	1605.6	22.8	0.00192	0.005552		0.952215	23		gb:AB109891.1 DB_XREF=gi:30578175 GEN=PHYA TID=Os.272.1 CNT=15 FEA=FLmRNA TIER=FL+Stack STK=7 UG=Os.272 DEF=Oryza sativa (japonica cultivar-group) PHYA mRNA for phytochrome A, complete cds. PROD=phytochrome A FL=gb:AK072482.1 gb:AB109891.1 REP	LOC_Os03g51030		unspliced-genomic phytochrome A, putative, expressed		AT1G09570	0	264508_at
Os.10746.1.S1_a_at	89.3	129.1	167.2	656.2	350.4	190.1	112.8	157.9	247.9	874.1	21.2	0.01649	0.0256348		84	142	213	738.6	296.1	191.4	100.8	194.9	241.2	880.2	20.8	0.02025	0.0241162		0.991196	21		gb:AB125308.1 DB_XREF=gi:46917341 GEN=SAPK7 TID=Os.10746.1 CNT=14 FEA=FLmRNA TIER=FL+Stack STK=7 UG=Os.10746 DEF=Oryza sativa (japonica cultivar-group) SAPK7 mRNA for serinethreonine protein kinase SAPK7, complete cds. PROD=serinethreonine prote	LOC_Os04g35240		unspliced-genomic serine/threonine-protein kinase SAPK7, putative, expressed		AT1G10940	2e-150	260480_at
Os.8664.1.S1_at	2828.6	2229.4	1483.6	2376.6	2954.4	2350.5	2933.4	1922.9	1515.5	2177.5	3.6	0.02087	0.0229874		2753.2	1670.7	1600.1	2588.4	2659.6	2608.5	2985.6	1863.6	1610.4	2419.4	2.8	0.01174	0.017292		0.881666	3.2		gb:AF402793.1 DB_XREF=gi:15430708 TID=Os.8664.1 CNT=11 FEA=FLmRNA TIER=FL+Stack STK=7 UG=Os.8664 DEF=Oryza sativa (japonica cultivar-group) clone RICS4992A putative glutathione S-transferase OsGSTT1 mRNA, complete cds. PROD=putative glutathione S	LOC_Os11g37730		unspliced-genomic glutathione S-transferase theta-1, putative, expressed		AT5G41210	6e-89	249291_at
Os.4610.1.S1_at	3588.9	4208	9179.9	8393.5	6820.5	6453.4	4005.9	5961.3	9374.1	10399.4	19.6	0.00187	0.00491116		1939.3	4703.6	7966.3	9443.8	6796.3	6242.3	4106.7	5558.7	7993.2	8456.6	20	0.00098	0.00625058		0.914742	19.8		gb:L34039.1 DB_XREF=gi:601870 TID=Os.4610.1 CNT=33 FEA=FLmRNA TIER=FL+Stack STK=7 UG=Os.4610 UG_TITLE=Manganese superoxide dismutase (rmsod1) mRNA, complete cds DEF=Oryza sativa manganese superoxide dismutase (rmsod2) mRNA, complete cds. FL=gb:A	LOC_Os05g25850		unspliced-genomic superoxide dismutase, mitochondrial precursor, putative, expressed		AT3G10920	1e-98	256439_at
Os.4610.1.A1_s_at	237.9	122.8	100.2	146.8	229.5	264	260.9	227.8	88.8	156.7	4.4	0.0023	0.00451786		455.3	475.2	186	337.5	397.5	531	620.7	427.3	221.6	251.6	6	0.00263	0.0075278		0.796364	5.2		gb:AK104160.1 DB_XREF=gi:32989369 TID=Os.4610.1 CNT=33 FEA=FLmRNA TIER=ConsEnd STK=0 UG=Os.4610 UG_TITLE=Manganese superoxide dismutase (rmsod1) mRNA, complete cds DEF=Oryza sativa (japonica cultivar-group) cDNA clone:006-211-E09, full insert seq	LOC_Os05g25850		unspliced-genomic superoxide dismutase, mitochondrial precursor, putative, expressed		AT3G10920	1e-98	256439_at
Os.12388.1.S1_at	14156.2	8624.8	13952	16126.8	8464.1	3221.2	4199.4	8682.6	15174.8	18803.1	18	0.04925	0.0224179		6440.4	7653.1	6526.8	10513.5	4943.9	2205.6	2915.2	8552.1	7534	10562.7	17.2	0.04453	0.0239436		0.826045	17.6		gb:AF039573.1 DB_XREF=gi:2773153 GEN=Asr1 TID=Os.12388.1 CNT=281 FEA=FLmRNA TIER=FL+Stack STK=6 UG=Os.12388 DEF=Oryza sativa abscisic acid- and stress-inducible protein (Asr1) mRNA, complete cds. PROD=abscisic acid- and stress-inducible protein	LOC_Os11g06720		unspliced-genomic abscisic stress ripening protein 2, putative, expressed
Os.12388.1.S1_x_at	13741.4	7599.2	13629.9	16467.7	8438.3	3064.2	4195.3	8950.9	13982.2	19663.3	18.4	0.05327	0.0470329		6207.1	7370.3	6466.9	10858.7	4966.7	2181	2660.3	7724.3	7183	10406.3	17.6	0.04047	0.0221294		0.856316	18		gb:AF039573.1 DB_XREF=gi:2773153 GEN=Asr1 TID=Os.12388.1 CNT=281 FEA=FLmRNA TIER=FL+Stack STK=6 UG=Os.12388 DEF=Oryza sativa abscisic acid- and stress-inducible protein (Asr1) mRNA, complete cds. PROD=abscisic acid- and stress-inducible protein	LOC_Os11g06720		unspliced-genomic abscisic stress ripening protein 2, putative, expressed
Os.12393.2.S1_at	47971.7	57186.6	37531.4	24942.8	36249.9	30851.9	49390.1	53990.4	35748.9	28385.6	10.4	0.00328	0.012451		53512.8	46161.4	37575.8	32133.6	34451.4	26858.6	43500.9	44903.7	34345.6	27279.2	10.4	0.02064	0.00876016		0.861793	10.4		gb:D30763.1 DB_XREF=gi:505134 TID=Os.12393.2 CNT=205 FEA=FLmRNA TIER=FL+Stack STK=6 UG=Os.12393 DEF=Oryza sativa (japonica cultivar-group) mRNA for ferredoxin, complete cds. PROD=ferredoxin FL=gb:AK119605.1 gb:AY072818.1 gb:AK119206.1 gb:D30763.	LOC_Os08g01380		unspliced-genomic ferredoxin-1, chloroplast precursor, putative, expressed		AT1G60950	8e-27	259727_at
Os.12393.2.S1_s_at	37319.1	49891.3	32374.2	19576	29813.4	25285.4	39300.6	42350.5	28531.8	22607.8	10.4	0.00781	0.0182026		39919.5	37161.7	26972.7	21050.5	26870.4	21282.6	32305.8	38003.5	22034.4	21020.6	10	0.01641	0.0151839		0.890274	10.2		gb:D30763.1 DB_XREF=gi:505134 TID=Os.12393.2 CNT=205 FEA=FLmRNA TIER=FL+Stack STK=6 UG=Os.12393 DEF=Oryza sativa (japonica cultivar-group) mRNA for ferredoxin, complete cds. PROD=ferredoxin FL=gb:AK119605.1 gb:AY072818.1 gb:AK119206.1 gb:D30763.	LOC_Os08g01380		unspliced-genomic ferredoxin-1, chloroplast precursor, putative, expressed		AT1G60950	8e-27	259727_at
Os.12393.2.S1_x_at	47289	57601.1	40382.3	30776.7	39738.2	33284.1	50481.6	53249.9	38429.3	32154.6	10.4	0.00729	0.0179796		52244.5	46382.5	40679.4	33875.8	38143.2	30220.6	43367.9	43451.8	34475.7	28987.8	10	0.04106	0.0157542		0.831205	10.2		gb:D30763.1 DB_XREF=gi:505134 TID=Os.12393.2 CNT=205 FEA=FLmRNA TIER=FL+Stack STK=6 UG=Os.12393 DEF=Oryza sativa (japonica cultivar-group) mRNA for ferredoxin, complete cds. PROD=ferredoxin FL=gb:AK119605.1 gb:AY072818.1 gb:AK119206.1 gb:D30763.	LOC_Os08g01380		unspliced-genomic ferredoxin-1, chloroplast precursor, putative, expressed		AT1G60950	8e-27	259727_at
Os.4831.1.S1_a_at	23259	31025.1	23483.8	13366.9	19562.4	19898.3	27000.1	30732.6	22613.6	17764.5	10.8	0.00361	0.0103884		32747.2	31493.7	26439.4	19862.2	22792.5	21242.5	29365.3	30450.9	21931.9	19059.7	10	0.00252	0.00504923		0.830281	10.4		gb:AF145053.1 DB_XREF=gi:6525064 GEN=tufA TID=Os.4831.1 CNT=68 FEA=FLmRNA TIER=FL+Stack STK=6 UG=Os.4831 DEF=Oryza sativa chloroplast translational elongation factor Tu (tufA) mRNA, complete cds; nuclear gene for chloroplast product. PROD=chloro	LOC_Os02g38210		unspliced-genomic elongation factor Tu, chloroplast precursor, putative, expressed		AT4G20360	0	254480_at
Os.12610.1.S1_at	8979.3	8133.9	9866.4	17342.1	9818.2	7650.9	7231.3	7750.2	10130.2	14414.4	20.4	0.02102	0.0260805		6667.4	7025.9	8851.4	16551.9	8114	6921.2	6303.1	7026.9	9698.8	13084.5	20	0.0159	0.0228208		0.98617	20.2		gb:AF155333.2 DB_XREF=gi:5148935 TID=Os.12610.1 CNT=96 FEA=FLmRNA TIER=FL+Stack STK=6 UG=Os.12610 DEF=Oryza sativa NADP-specific isocitrate dehydrogenase mRNA, complete cds. PROD=NADP-specific isocitrate dehydrogenase FL=gb:AF155333.2 gb:AK06175	LOC_Os01g46610		unspliced-genomic isocitrate dehydrogenase, chloroplast precursor, putative, expressed		AT1G65930	0	261920_at
Os.3420.1.S1_at	6400	5827.4	5419.7	3816.2	3083.1	5664.5	4784.3	5980.4	6964.6	4325.9	11.6	0.05424	0.0197957		5357.1	7184.4	5166.6	3581.4	4459.2	6665.3	6638.6	5362.3	5525	3236.8	8.8	0.0259	0.0360019		0.54489	10.2		gb:AB047313.1 DB_XREF=gi:30409355 GEN=OsRAc1 TID=Os.3420.1 CNT=45 FEA=FLmRNA TIER=FL+Stack STK=6 UG=Os.3420 DEF=Oryza sativa (japonica cultivar-group) OsRAc1 mRNA for actin, complete cds. PROD=actin FL=gb:AK100267.1 gb:AK058421.1 gb:AB047313.1	LOC_Os03g50890		unspliced-genomic actin-1, putative, expressed		AT3G12110	0	256275_at
Os.3420.1.S1_s_at	3243.8	4558.5	3569.2	2882.7	3277.8	4152.7	4576.5	5446.2	4939.9	3121.2	11.2	0.09664	0.0340959		3782.8	4938.4	4078.7	3291.5	3520.9	4132.4	4477.3	4970.4	5033.2	2501.9	11.2	0.03975	0.0304881		0.890077	11.2		gb:AB047313.1 DB_XREF=gi:30409355 GEN=OsRAc1 TID=Os.3420.1 CNT=45 FEA=FLmRNA TIER=FL+Stack STK=6 UG=Os.3420 DEF=Oryza sativa (japonica cultivar-group) OsRAc1 mRNA for actin, complete cds. PROD=actin FL=gb:AK100267.1 gb:AK058421.1 gb:AB047313.1	LOC_Os03g50890		unspliced-genomic actin-1, putative, expressed		AT3G12110	0	256275_at
Os.11944.1.S2_s_at	18044.2	13617.5	7340.5	11128.9	13391.1	14570	24036.8	10951.7	8505.8	9255.4	6	0.01054	0.0200217		18628.9	10679	6457.9	11480.1	13403.3	13580.2	24480.8	9134.6	7585.1	8820.1	5.6	0.02445	0.0272058		0.982514	5.8		gb:AK058899.1 DB_XREF=gi:32968917 TID=Os.11944.1 CNT=53 FEA=FLmRNA TIER=FL+Stack STK=6 UG=Os.11944 UG_TITLE=(japonica cultivar-group) DRE binding factor 2 (DBF2) mRNA, complete cds DEF=Oryza sativa (japonica cultivar-group) cDNA clone:001-008-A04	LOC_Os09g20350	AP2-EREBP	unspliced-genomic DRE binding factor 1, putative, expressed		AT1G78080	3e-32	262135_at
Os.11944.1.S1_at	5980	2760.6	1680.2	2627.2	3115.2	4170.8	7393.8	2683.1	2068.4	2337.9	6	0.01161	0.0200582		4517.6	2910.5	1684.9	3362	4402.5	5722.6	9986.2	2618.5	1938.4	2221.3	5.2	0.03516	0.0191583		0.90556	5.6		gb:AK070758.1 DB_XREF=gi:32980781 TID=Os.11944.1 CNT=53 FEA=FLmRNA TIER=FL STK=1 UG=Os.11944 UG_TITLE=(japonica cultivar-group) DRE binding factor 2 (DBF2) mRNA, complete cds DEF=Oryza sativa (japonica cultivar-group) cDNA clone:J023067F14, full	LOC_Os09g20350	AP2-EREBP	unspliced-genomic DRE binding factor 1, putative, expressed		AT1G78080	3e-32	262135_at
Os.12701.1.S2_at	8267.4	17742	18965.2	25869.7	19273.8	13422.7	7569.6	26733.4	24420.4	25945.8	18	0.01551	0.0255177		8194.7	21175	26448.2	29622.3	18745.4	12694.7	7196.7	28626.9	26584.8	27806.9	17.6	0.00183	0.00911024		0.963822	17.8		gb:AK071913.1 DB_XREF=gi:32981936 TID=Os.12701.1 CNT=50 FEA=FLmRNA TIER=FL+Stack STK=6 UG=Os.12701 UG_TITLE=(japonica cultivar-group) mRNA for oryzain alpha, complete cds DEF=Oryza sativa (japonica cultivar-group) cDNA clone:J013065M08, full inse	LOC_Os04g55650		unspliced-genomic cysteine proteinase RD21a precursor, putative, expressed		AT1G47128	4e-114	245803_at
Os.12701.1.S1_at	1962.2	3002.5	5244.4	7294.1	5600	3621.9	1800.9	6849.4	8111.4	9164	19.2	0.00807	0.00970031		1016.7	3176.3	4306.3	7979.8	3953.1	2175.4	1165.8	6019.4	6823.1	9046	18.8	0.00507	0.00875074		0.965415	19		gb:AK121500.1 DB_XREF=gi:37991123 TID=Os.12701.1 CNT=50 FEA=FLmRNA TIER=FL STK=1 UG=Os.12701 UG_TITLE=(japonica cultivar-group) mRNA for oryzain alpha, complete cds DEF=Oryza sativa (japonica cultivar-group) cDNA clone:J033022A11, full insert seq	LOC_Os04g55650		unspliced-genomic cysteine proteinase RD21a precursor, putative, expressed		AT1G47128	4e-114	245803_at
Os.12691.1.A1_a_at	27461.7	26659.6	24542.5	30401	34709.7	35935.6	34356.1	27844.4	23952.7	29661.5	2.8	0.00276	0.00186932		28246.6	23953.8	26183.1	30148	34554.4	32653.6	29937.5	27176.5	24059.3	26542.8	2	0.0022	0.0010202		0.882929	2.4		gb:AK101076.1 DB_XREF=gi:32986285 TID=Os.12691.1 CNT=27 FEA=FLmRNA TIER=FL+Stack STK=6 UG=Os.12691 UG_TITLE=(japonica cultivar-group) OsEIL1 mRNA for ethylene-insensitive-3-like protein, complete cds DEF=Oryza sativa (japonica cultivar-group) cDN	LOC_Os03g20780	EIL	unspliced-genomic ETHYLENE-INSENSITIVE3-like 1 protein, putative, expressed		AT3G20770	2e-136	257981_at
Os.12691.1.A1_x_at	10675.2	9190.3	8946.6	11694.6	12692.6	17207.1	12312.3	9957.1	9660.4	10992.9	2.8	0.0063	0.00544187		10991.4	9724.6	10190.2	11513.2	13830.3	16045	12422.7	10549	9673	10733.8	2.8	0.00191	0.00169587		0.965688	2.8		gb:AK101076.1 DB_XREF=gi:32986285 TID=Os.12691.1 CNT=27 FEA=FLmRNA TIER=FL+Stack STK=6 UG=Os.12691 UG_TITLE=(japonica cultivar-group) OsEIL1 mRNA for ethylene-insensitive-3-like protein, complete cds DEF=Oryza sativa (japonica cultivar-group) cDN	LOC_Os03g20780	EIL	unspliced-genomic ETHYLENE-INSENSITIVE3-like 1 protein, putative, expressed		AT3G20770	2e-136	257981_at
Os.2247.1.S1_at	6208.2	6758	14036.7	16310.9	12270.4	12474.2	7161.2	6573.9	15324.6	14793.4	20.8	0.0023	0.00944858		2870.3	4765.5	14127.2	16259.4	13888.7	13724.1	6765.4	7249.4	15587.2	16156	21.2	0.00243	0.00483982		0.969238	21		gb:AF093630.1 DB_XREF=gi:3885883 GEN=RPL21 TID=Os.2247.1 CNT=21 FEA=FLmRNA TIER=FL+Stack STK=6 UG=Os.2247 DEF=Oryza sativa 60S ribosomal protein L21 (RPL21) mRNA, complete cds. PROD=60S ribosomal protein L21 FL=gb:AF093630.1 REP_ORG=O. sativa	LOC_Os10g32820		unspliced-genomic 60S ribosomal protein L21, putative, expressed		AT1G57660	8e-86	246379_s_at
Os.27893.1.S1_at	658.9	446	471.3	567.3	752	692.7	760.6	892.4	610.4	661.3	4.4	0.44107	0.0407517		1227.8	972.5	844.2	950.4	1009.1	1292.3	1233.4	1166.3	870.1	968.7	5.6	0.0013	0.0035504		0.623338	5		gb:AK072409.1 DB_XREF=gi:32982432 TID=Os.27893.1 CNT=25 FEA=FLmRNA TIER=FL STK=1 UG=Os.27893 UG_TITLE=(japonica cultivar-group) kiaa0078 protein (P0674H09.22), mRNA DEF=Oryza sativa (japonica cultivar-group) cDNA clone:J023083F05, full insert seq	LOC_Os01g67250		unspliced-genomic N terminus of Rad21 / Rec8 like protein, expressed		AT5G16270	6e-151	246500_at
Os.6039.1.S1_at	1938.9	1830.1	1455.8	1616	1744.8	2146.4	1752.8	1543.9	1427.2	1811	4	0.01917	0.00574844		1784.8	1559.1	1217.7	1289.4	1667.2	1816.8	1647	1595.3	1585.7	1572.5	5.2	0.0327	0.00776986		0.703626	4.6		gb:AB101648.1 DB_XREF=gi:31339102 GEN=Roc5 TID=Os.6039.1 CNT=18 FEA=FLmRNA TIER=FL+Stack STK=6 UG=Os.6039 DEF=Oryza sativa (japonica cultivar-group) Roc5 mRNA for GL2-type homeodomain protein, complete cds. PROD=GL2-type homeodomain protein FL=	LOC_Os02g45250	HB	unspliced-genomic homeobox protein FWA, putative, expressed		AT4G00730	0	255636_at
Os.3400.1.S1_s_at	485.6	248	290.8	7828.4	9540.3	8023.3	1771.1	170.5	231.5	8401.1	0	8e-05	0.00641074		619.3	288.9	284.6	7414.3	8563.3	7724	1769.2	245.5	366.6	8955.8	0	0.0002	0.00684888		0.995888	0		gb:AB001888.1 DB_XREF=gi:3618319 TID=Os.3400.1 CNT=19 FEA=FLmRNA TIER=FL+Stack STK=6 UG=Os.3400 DEF=Oryza sativa (japonica cultivar-group) mRNA for zinc finger protein, complete cds, clone:S3574. PROD=zinc finger protein FL=gb:AK071630.1 gb:AB00	LOC_Os02g49230	C2C2-CO-like	unspliced-genomic zinc finger protein CONSTANS-LIKE 11, putative, expressed		AT3G07650	2e-78	259244_at
Os.15306.1.S1_a_at	933.4	1320.7	1768.6	2194.5	1552.9	798.7	1062.4	1382.9	2227.7	2601.7	18.8	0.0005	0.00203767		1126.1	1720.7	2220.6	2410	1834.2	929.2	1148.8	1643	2103.2	2502.1	18.4	2e-05	0.00128031		0.949951	18.6		gb:AK071221.1 DB_XREF=gi:32981244 TID=Os.15306.1 CNT=12 FEA=FLmRNA TIER=FL+Stack STK=6 UG=Os.15306 UG_TITLE=(japonica cultivar-group) P0456B03.1 (P0456B03.1), mRNA DEF=Oryza sativa (japonica cultivar-group) cDNA clone:J023088C02, full insert sequ	LOC_Os08g32870		unspliced-genomic betaine-aldehyde dehydrogenase, putative, expressed		AT1G74920	0	262173_at
Os.12290.1.S1_at	2844	2697.9	6651.9	8784.5	6889.9	6463.2	3773.5	3559.1	6927.2	8443.3	21.6	0.00029	0.00299492		1646.8	2787.5	6081.2	9025	7212.4	6383.1	3807.4	3028.3	6692	8164.3	21.6	0.0002	0.00151669		0.985896	21.6		gb:D21130.1 DB_XREF=gi:415316 GEN=YK704 TID=Os.12290.1 CNT=140 FEA=FLmRNA TIER=FL STK=5 UG=Os.12290 DEF=Rice mRNA for acidic ribosomal protein P0, complete cds. PROD=acidic ribosomal protein P0 FL=gb:AK064857.1 gb:D21130.1 gb:AK062008.1 REP_OR	LOC_Os08g03640		unspliced-genomic 60S acidic ribosomal protein P0, putative, expressed		AT2G40010	3e-122	267349_at
Os.6634.1.S1_at	2344.2	4336.3	4623.7	4998.3	4370.4	3723	2058.5	3586.3	4480.6	4583	19.2	0.00456	0.00744321		1187.3	3308.9	4468	6115.8	4454.1	5048.5	2058	3794.2	5502.2	4077.2	20.4	0.04771	0.0414728		0.840208	19.8		gb:AB050624.1 DB_XREF=gi:21698921 TID=Os.6634.1 CNT=69 FEA=FLmRNA TIER=FL STK=5 UG=Os.6634 UG_TITLE=OsAK mRNA for adenosine kinase, complete cds DEF=Oryza sativa OsAK mRNA for adenosine kinase, complete cds. FL=gb:AK101791.1 gb:AB050624.1 gb:AK0	LOC_Os02g41590		unspliced-genomic adenosine kinase 2, putative, expressed		AT5G03300	1e-167	250898_at
Os.12261.1.S1_a_at	2807.2	9668.5	4346.8	777.5	1746.2	682.6	7726.7	6033.4	4991	784.7	11.6	0.0138	0.0201571		4831.9	10019	4717.5	912.3	1598.9	1145.1	9422.4	7724.8	7290.8	477.2	11.6	0.00308	0.00831287		0.970968	11.6		gb:AY256847.1 DB_XREF=gi:32442210 GEN=CK1 TID=Os.12261.1 CNT=38 FEA=FLmRNA TIER=FL STK=5 UG=Os.12261 DEF=Oryza sativa (japonica cultivar-group) CIPK-like protein (CK1) mRNA, complete cds. PROD=CIPK-like protein FL=gb:AK111920.1 gb:AY256847.1 gb	LOC_Os03g20380		unspliced-genomic CIPK-like protein 1, putative, expressed		AT2G26980	0	266313_at
Os.167.1.S1_at	407.9	419.3	1040	1980.8	898.8	510.5	484.2	489.2	1299.8	2935.5	20.4	0.0131	0.0328368		280.5	434.2	1027.4	2314.8	815.5	455.4	210.2	396.7	1113.2	1723.6	20	0.0025	0.0089298		0.878797	20.2		gb:D45384.1 DB_XREF=gi:1747295 TID=Os.167.1 CNT=35 FEA=FLmRNA TIER=FL STK=5 UG=Os.167 DEF=Oryza sativa mRNA for vacuolar H+-pyrophosphatase, complete cds. PROD=vacuolar H+-pyrophosphatase FL=gb:D45384.1 gb:AK066933.1 REP_ORG=O. sativa	LOC_Os06g08080		unspliced-genomic pyrophosphate-energized vacuolar membrane proton pump, putative, expressed		AT1G15690	0	259504_at
Os.12161.1.S1_at	22654.5	21531.1	14045.9	3784.7	6798.4	9511.4	15080.6	22105.8	13251.2	4464.7	10.8	0.00035	0.00165268		28596.6	25571.3	12407	3747.5	7622.3	9765.4	19165.4	21608.9	12673.4	4282.7	10	0.00053	0.000944465		0.969533	10.4		gb:D85317.1 DB_XREF=gi:2073374 TID=Os.12161.1 CNT=38 FEA=FLmRNA TIER=FL STK=5 UG=Os.12161 DEF=Oryza sativa (japonica cultivar-group) mRNA for farnesyl pyrophosphate synthase, complete cds. PROD=farnesyl pyrophosphate synthase FL=gb:AK061657.1 gb	LOC_Os01g50760		unspliced-genomic farnesyl pyrophosphate synthetase, putative, expressed		AT5G47770	3e-151	248718_at
Os.18635.1.S1_at	8463.3	8866.8	5936	4169.4	5983.4	7587.3	10373.6	7796.3	5403.1	4956	8	0.00025	0.00627666		11202.1	7605.1	6947.4	5171.1	7354.7	7662.8	12118.6	8253.9	6042.5	6025.7	7.6	0.00469	0.0116649		0.880858	7.8		gb:AB071966.1 DB_XREF=gi:22759583 GEN=OsMCP TID=Os.18635.1 CNT=26 FEA=FLmRNA TIER=FL STK=5 UG=Os.18635 DEF=Oryza sativa (japonica cultivar-group) OsMCP mRNA for Moco containing protein, complete cds. PROD=Moco containing protein FL=gb:AB071966.	LOC_Os08g41830		unspliced-genomic sulfite oxidase, putative, expressed		AT3G01910	0	258948_at
Os.12725.1.S1_at	2100.9	5614.4	1748.9	320.3	290.6	334.5	565.1	6278.3	1877.7	948	12.4	0.03357	0.0313257		2488.2	9910.3	3256.8	552.4	325.7	360.6	453.4	8296.4	1731.4	319.2	12.4	0.04544	0.0338562		0.971837	12.4		gb:AF165890.1 DB_XREF=gi:5734102 TID=Os.12725.1 CNT=24 FEA=FLmRNA TIER=FL STK=5 UG=Os.12725 DEF=Oryza sativa subsp. japonica soluble starch synthase mRNA, complete cds. PROD=soluble starch synthase FL=gb:AY299404.1 gb:AF165890.1 gb:D16202.1 gb:A	LOC_Os06g06560		unspliced-genomic soluble starch synthase 1, chloroplast precursor, putative, expressed		AT5G24300	0	249785_at
Os.18498.1.S1_at	12620.8	9158.6	9625.7	11524.5	14603	16339	14513.7	9040.5	9678.4	11165.1	2.8	8e-05	0.00136462		12925.4	7915.9	9976.4	11909.2	13934.2	12903.9	16185.5	9019.3	9771.8	12242.5	2.8	0.03852	0.0255848		0.84805	2.8		gb:AK101599.1 DB_XREF=gi:32986808 TID=Os.18498.1 CNT=23 FEA=FLmRNA TIER=FL STK=5 UG=Os.18498 UG_TITLE=(japonica cultivar-group) isolate 20818 TaWIN2-like protein mRNA, complete cds DEF=Oryza sativa (japonica cultivar-group) cDNA clone:J033051I09,	LOC_Os08g37490		unspliced-genomic 14-3-3-like protein A, putative, expressed		AT1G78300	1e-91	260775_at
Os.8665.1.S1_at	4505.4	3629.9	5319.9	4645.6	6638.3	6577.8	5844.2	3983.3	4855.2	5428.3	1.2	0.02564	0.0156066		3156.7	3554.9	3996.7	5462.2	6238.1	7094	5103.8	3459.2	4027.7	3874.9	1.6	0.02358	0.0214233		0.800764	1.4		gb:AF189365.1 DB_XREF=gi:6007802 TID=Os.8665.1 CNT=17 FEA=FLmRNA TIER=FL STK=5 UG=Os.8665 DEF=Oryza sativa D-ribulose-5-phosphate 3-epimerase mRNA, complete cds. PROD=D-ribulose-5-phosphate 3-epimerase FL=gb:AF189365.1 gb:AK069451.1 REP_ORG=O.	LOC_Os09g32810		unspliced-genomic ribulose-phosphate 3-epimerase, putative, expressed		AT1G63290	5e-69	260085_at
Os.8665.1.S1_s_at	1660.1	1546.1	2088.8	2319	2691.9	2769.6	2322.4	1590.2	2032.6	2081.3	0.8	0.01209	0.00315963		1210.2	1397	1856.1	2400.6	2446.3	2974	2405.5	1677.8	1956.8	2076.5	0.8	0.06705	0.0334651		0.937503	0.8		gb:AF189365.1 DB_XREF=gi:6007802 TID=Os.8665.1 CNT=17 FEA=FLmRNA TIER=FL STK=5 UG=Os.8665 DEF=Oryza sativa D-ribulose-5-phosphate 3-epimerase mRNA, complete cds. PROD=D-ribulose-5-phosphate 3-epimerase FL=gb:AF189365.1 gb:AK069451.1 REP_ORG=O.	LOC_Os09g32810		unspliced-genomic ribulose-phosphate 3-epimerase, putative, expressed		AT1G63290	5e-69	260085_at
Os.8642.1.S1_a_at	6275.1	2226.9	3512.7	6850.1	10510.3	11344	10377.5	2007.9	2577.3	7913.9	2	0.00056	0.00233259		10851	2356	2681.1	8319.4	16745.1	13237.5	13374.4	1587.9	3027.6	11734.1	2	0.00053	0.00236723		0.957896	2		gb:AB018444.1 DB_XREF=gi:6006311 GEN=Osnph1a TID=Os.8642.1 CNT=20 FEA=FLmRNA TIER=FL STK=5 UG=Os.8642 DEF=Oryza sativa (japonica cultivar-group) mRNA for nonphototrophic hypocotyl 1a, complete cds. PROD=nonphototrophic hypocotyl 1a FL=gb:AB0184	LOC_Os12g01140		unspliced-genomic phototropin-1, putative, expressed		AT3G45780	0	252543_at
Os.11431.1.S1_at	2459.1	1997.3	1976.7	2487.9	2734	2409.9	2469.1	2211.8	2068	2888.4	0.8	0.03318	0.0152309		2012.4	1542.2	1808.9	2339.5	2328.1	1824.7	2105.4	1816.1	2247.4	2361.3	22.4	0.07854	0.0376146		0.706375	23.6		gb:AB110206.1 DB_XREF=gi:32352209 TID=Os.11431.1 CNT=16 FEA=FLmRNA TIER=FL STK=5 UG=Os.11431 UG_TITLE=(japonica cultivar-group) mRNA for hypothetical protein, complete cds, contig of clone: OsAHP1SE2 and 23C4BG007 DEF=Oryza sativa (japonica culti	LOC_Os04g49990		unspliced-genomic AT-hook protein 1, putative, expressed		AT2G33620	1e-45	255792_at
Os.9209.1.S1_at	582.2	417.6	568.2	927.1	621	714.4	356.5	454.3	864.3	709.7	21.2	0.06203	0.037749		494	458.8	600.2	824.4	575.6	686.6	401	538.2	537.8	864.5	21.6	0.02143	0.0279624		0.710993	21.4		gb:AY323487.1 DB_XREF=gi:33087078 GEN=SP1 TID=Os.9209.1 CNT=14 FEA=FLmRNA TIER=FL STK=5 UG=Os.9209 DEF=Oryza sativa (japonica cultivar-group) stress-responsive protein (SP1) mRNA, complete cds. PROD=stress-responsive protein FL=gb:AK065802.1 gb	LOC_Os01g33204		unspliced-genomic retrotransposon protein, putative, unclassified, expressed
Os.9209.1.S1_s_at	373.1	211.3	312.4	428.9	400.3	475.4	246.6	353.7	410.7	432.5	23.6	0.08874	0.0397685		249.4	227.4	366.5	485.4	388.8	366.4	313.8	362.8	339.6	605.8	21.2	0.02198	0.0178583		0.597377	22.4		gb:AY323487.1 DB_XREF=gi:33087078 GEN=SP1 TID=Os.9209.1 CNT=14 FEA=FLmRNA TIER=FL STK=5 UG=Os.9209 DEF=Oryza sativa (japonica cultivar-group) stress-responsive protein (SP1) mRNA, complete cds. PROD=stress-responsive protein FL=gb:AK065802.1 gb	LOC_Os01g33204		unspliced-genomic retrotransposon protein, putative, unclassified, expressed
Os.10450.1.S1_at	2608.8	3283.2	3451.9	4343.5	4047.1	3901.2	2787.2	3149.5	4157.2	3961	21.2	0.00544	0.0137513		2478	2681.2	3848.4	3742.2	3706.4	3547.4	2606.1	3025	4255.1	3579.2	20	0.01847	0.031547		0.870316	20.6		gb:AB117988.1 DB_XREF=gi:42733463 GEN=bip131 TID=Os.10450.1 CNT=20 FEA=FLmRNA TIER=FL STK=5 UG=Os.10450 DEF=Oryza sativa (japonica cultivar-group) bip131 mRNA for BRI1-KD interacting protein 131, complete cds. PROD=BRI1-KD interacting protein 13	LOC_Os08g30060		unspliced-genomic proton pump interactor, putative, expressed		AT4G27500	1e-86	253868_at
Os.3407.1.S1_a_at	7992	13414.4	11893.9	6408	4016.9	3795.4	7240.8	14448	12611.3	5645.1	13.6	7e-05	0.00148387		10056.2	15610.4	17094.3	6322.5	5211.6	4594.8	8786.2	15598.6	14265	7853.7	13.6	0.00017	0.00182624		0.962415	13.6		gb:AB005290.1 DB_XREF=gi:2780745 TID=Os.3407.1 CNT=15 FEA=FLmRNA TIER=FL STK=5 UG=Os.3407 UG_TITLE=(japonica cultivar-group) plastid RNA polymerase sigma factor (OJ9990_A01.9), mRNA DEF=Oryza sativa (japonica cultivar-group) mRNA for plastid RNA	LOC_Os08g06630	Orphans	unspliced-genomic RNA polymerase sigma factor rpoD, putative, expressed		AT1G64860	8e-114	262879_at
Os.4170.1.S1_at	1794.4	1340.4	1299.3	2373.2	2347.1	4368	1673.2	2134.5	1453.2	2433.1	2	0.06186	0.0345564		1143.3	1804.1	1609	2777.1	2300.7	3847.5	1719.9	1924.9	1811.9	2819.6	0.4	0.10834	0.0440145		0.894311	1.2		gb:AB018377.1 DB_XREF=gi:3763848 GEN=OsENOD93b TID=Os.4170.1 CNT=13 FEA=FLmRNA TIER=FL STK=5 UG=Os.4170 DEF=Oryza sativa (japonica cultivar-group) OsENOD93b mRNA for early nodulin, complete cds. PROD=early nodulin FL=gb:AK120885.1 gb:AK072428.1	LOC_Os02g13380		unspliced-genomic early nodulin 93, putative, expressed		AT5G25940	3e-18	246863_at
Os.26502.1.S1_a_at	550.1	1552.8	1838.2	2318.7	1282.8	821.5	681.5	1652.2	2436.4	1880.8	17.6	0.00025	0.00472545		339	945.3	2455.3	2146.5	957.2	801.8	521	965.7	2367.9	1260.9	17.6	0.00597	0.014098		0.868481	17.6		gb:AB114855.1 DB_XREF=gi:32879780 TID=Os.26502.1 CNT=13 FEA=FLmRNA TIER=FL STK=5 UG=Os.26502 DEF=Oryza sativa (japonica cultivar-group) mRNA for stromal ascorbate peroxidase, complete cds. PROD=stromal ascorbate peroxidase FL=gb:AB114855.1 gb:AK	LOC_Os04g35520		unspliced-genomic OsAPx7 - Stromal Ascorbate Peroxidase encoding gene, expressed		AT4G08390	5e-134	255142_at
Os.7101.1.S1_at	850.8	1910.7	4164.7	4440.6	2913.6	1554.6	953.3	1851.6	3889.6	4290.8	19.2	0	0.00115733		741.1	1565.5	3432.4	5324.2	3124.4	1902.7	936.5	1569.7	4370.8	4359.6	20	6e-05	0.0119837		0.961167	19.6		gb:AY453405.1 DB_XREF=gi:42541302 GEN=GS TID=Os.7101.1 CNT=14 FEA=FLmRNA TIER=FL STK=5 UG=Os.7101 DEF=Oryza sativa glutathione synthetase mRNA, complete cds. PROD=glutathione synthetase FL=gb:AK099555.1 gb:AY453405.1 REP_ORG=O. sativa	LOC_Os12g16200		unspliced-genomic glutathione synthetase, chloroplast precursor, putative, expressed		AT5G27380	2e-145	246785_at
Os.11782.1.S1_at	824.4	1309	1639.4	2230.2	1158.5	1504.7	765.9	1543.1	1959	2149.2	18.8	0.00882	0.0172223		765.7	1729.5	1736.1	1740.8	1104.1	1358.6	494.4	1399.4	2067.4	1766.5	17.6	0.01321	0.0175567		0.86404	18.2		gb:AB125307.1 DB_XREF=gi:46917339 GEN=SAPK6 TID=Os.11782.1 CNT=13 FEA=FLmRNA TIER=FL STK=5 UG=Os.11782 DEF=Oryza sativa (japonica cultivar-group) SAPK6 mRNA for serinethreonine protein kinase SAPK6, complete cds. PROD=serinethreonine protein kin	LOC_Os02g34600		unspliced-genomic serine/threonine-protein kinase SAPK6, putative, expressed		AT1G10940	3e-150	260480_at
Os.1.1.S1_s_at	2543.8	2287.3	2982	2799.9	2596	1971.6	1674.8	3275.8	3215.1	2962.1	16.8	0.03672	0.039544		1671.2	2374	3032.2	3094	2457.3	1821.6	1681.6	3165	3597.1	3562.6	17.6	0.0008	0.002864		0.862389	17.2		gb:D87547.1 DB_XREF=gi:1778685 TID=Os.1.1 CNT=13 FEA=FLmRNA TIER=FL STK=5 UG=Os.1 DEF=Oryza sativa mRNA for precursor ferredoxin-NADP+ oxidoreductase, complete cds. PROD=precursor ferredoxin-NADP+ oxidoreductase FL=gb:AK061177.1 gb:D87547.1 REP	LOC_Os07g05400		unspliced-genomic ferredoxin--NADP reductase, embryo isozyme, chloroplast precursor, putative, expressed		AT4G05390	8e-172	255230_at
Os.4177.1.S1_at	5815.6	4176.6	7216.2	7545.1	7275.8	5325.5	5510.9	3775.1	5607.1	9793.6	21.6	0.01944	0.0435404		3864.7	3899	5530.5	8200	7909	5158.9	5894.7	4082.5	5448	9032.7	22	0.00267	0.00728589		0.875952	21.8		gb:AB022675.1 DB_XREF=gi:5456937 GEN=rps9 TID=Os.4177.1 CNT=11 FEA=FLmRNA TIER=FL STK=5 UG=Os.4177 DEF=Oryza sativa (japonica cultivar-group) rps9 mRNA for ribosomal protein S9, complete cds. PROD=ribosomal protein S9 FL=gb:AK104434.1 gb:AB0226	LOC_Os03g55930		unspliced-genomic 30S ribosomal protein S9, chloroplast precursor, putative, expressed		AT1G74970	1e-54	262172_at
Os.4417.1.S1_at	6834.1	1618.6	701.3	228.7	144.8	108.8	1840.2	1324.6	656.6	480.5	8.8	0.17624	0.035395		6966.7	1909.6	421.3	353.1	205.9	227.3	2547.3	1910.4	501.1	145.4	8.4	0.08481	0.0312624		0.987516	8.6		gb:D78573.1 DB_XREF=gi:1107460 TID=Os.4417.1 CNT=13 FEA=FLmRNA TIER=FL STK=5 UG=Os.4417 DEF=Rice mRNA for aspartate kinase-homoserine dehydrogenase, complete cds. PROD=aspartate kinase-homoserine dehydrogenase FL=gb:AK068391.1 gb:D78573.1 gb:AK0	LOC_Os09g12290		unspliced-genomic bifunctional aspartokinase/homoserine dehydrogenase 2, chloroplast precursor, putative, expressed		AT4G19710	0	254535_at
Os.27006.1.S1_at	1552.2	1618.2	2085.4	2917.1	3416.8	3373.8	2683	1058.3	1641.5	3010.5	0.4	0.00149	0.00291907		1526.1	969.9	1791.8	2927.9	3575.5	2860.1	2715.7	880.5	1659.9	3535.4	0	0.00127	0.00404009		0.947459	0.2		gb:AB095095.1 DB_XREF=gi:32351879 GEN=OsSig2B TID=Os.27006.1 CNT=10 FEA=FLmRNA TIER=FL STK=5 UG=Os.27006 DEF=Oryza sativa (japonica cultivar-group) OsSig2B mRNA for plastid sigma factor 2B, complete cds. PROD=plastid sigma factor 2B FL=gb:AB095	LOC_Os03g16430	Sigma70-like	unspliced-genomic RNA polymerase sigma factor rpoD1, putative, expressed		AT1G08540	1e-93	264781_at
Os.2234.1.A1_a_at	2189.8	1905.9	1615.2	1639.4	1836.8	1991.9	2308.2	2189	1631.6	1559.2	7.2	0.00056	0.00184939		3011.7	2234.7	1854.2	1890.5	2130.3	2326.8	2589.3	2386	1817.2	1870.9	6.8	0.00172	0.0115515		0.900557	7		gb:U04295.1 DB_XREF=gi:435941 GEN=osZIP-1a TID=Os.2234.1 CNT=8 FEA=FLmRNA TIER=FL STK=5 UG=Os.2234 DEF=Oryza sativa Nipponbare bZIP DNA-binding factor (osZIP-1a) mRNA, complete cds. PROD=DNA-binding factor of bZIP class FL=gb:U04295.1 REP_ORG=	LOC_Os12g13170	bZIP	unspliced-genomic transcription factor HBP-1a, putative, expressed		AT1G32150	7e-53	245786_at
Os.6263.1.S1_at	1380	3667.4	2386.3	2142.8	1418.7	1101.6	2171.1	2711.8	3091.4	1452.1	14	0.01124	0.0120893		823.1	7381.6	2689.3	2051.9	899	1204.3	817.3	3490.4	4324.4	1526.3	14	0.07437	0.0419183		0.904934	14		gb:AB025926.3 DB_XREF=gi:7209771 GEN=BI-1 TID=Os.6263.1 CNT=83 FEA=FLmRNA TIER=FL STK=5 UG=Os.6263 DEF=Oryza sativa BI-1 mRNA for Bax inhibitor-1, complete cds. PROD=Bax inhibitor-1 FL=gb:AK061953.1 gb:AK101060.1 gb:AB025926.3 gb:AK061564.1 RE	LOC_Os02g03280		unspliced-genomic bax inhibitor 1, putative, expressed		AT5G47120	9e-77	248833_at
Os.12520.1.S1_a_at	6915.4	8159.4	14094.6	14394.4	5774.2	1995.3	2165.4	8900.9	11029	19783.5	18	0.00609	0.00383761		3875.1	10779.6	18616.6	12218.2	5258.9	917.3	2673.3	7294.1	12244	19179.5	17.2	0.00184	0.00128031		0.934863	17.6		gb:AF198626.1 DB_XREF=gi:6525008 TID=Os.12520.1 CNT=23 FEA=FLmRNA TIER=FL STK=5 UG=Os.12520 DEF=Oryza sativa copper chaperone homolog CCH mRNA, complete cds. PROD=copper chaperone homolog CCH FL=gb:AF198626.1 gb:AK121599.1 REP_ORG=O. sativa	LOC_Os02g32814		unspliced-genomic heavy metal-associated domain containing protein, expressed		AT5G24030	8e-30	249765_at
Os.12854.1.S1_at	826.6	1502.1	2501.8	3034.2	1690.6	1698.9	625.2	1571.1	2797.8	3054.1	19.2	0.00032	0.00345704		565	1299	2383.6	2798.7	1385.8	1843	588.4	1558.5	2635	2600.5	19.2	0.00321	0.010709		0.982069	19.2		gb:AB110178.1 DB_XREF=gi:32352153 TID=Os.12854.1 CNT=29 FEA=FLmRNA TIER=FL STK=5 UG=Os.12854 DEF=Oryza sativa (japonica cultivar-group) mRNA for nascent polypeptide associated complex alpha chain, complete cds, clone: 13YPG044. PROD=nascent polyp	LOC_Os05g31000		unspliced-genomic nascent polypeptide-associated complex alpha subunit-like protein, putative, expressed		AT3G12390	8e-56	256241_at
Os.2215.1.S1_at	13223.5	11599.5	5758.4	3854.4	4612.8	4484.2	13038.3	10246.6	6412.7	4051.4	9.6	0.00157	0.00472163		16399.5	9197.7	6790.3	4211.5	3921.9	4355.6	13376.9	9581.1	7881.6	4934.3	9.6	0.01577	0.00885905		0.935239	9.6		gb:U88068.1 DB_XREF=gi:2286120 TID=Os.2215.1 CNT=28 FEA=FLmRNA TIER=FL STK=5 UG=Os.2215 DEF=Oryza sativa sec14 like protein mRNA, complete cds. PROD=sec14 like protein FL=gb:U88068.1 gb:AK121373.1 REP_ORG=O. sativa	LOC_Os01g70210		unspliced-genomic phosphatidylinositol transfer protein CSR1, putative, expressed		AT1G01630	3e-68	261563_at
Os.414.1.S1_at	4302.4	5744.2	7443.3	6198.8	5349.4	4457.9	3543.2	7007.1	7775.6	7165.3	16.8	0.00106	0.00561652		3113.3	5247.9	6611.8	6103.7	4448.3	3618.8	2803.4	6231.6	6221.3	5029	16.8	0.00204	0.00592034		0.923191	16.8		gb:U34597.1 DB_XREF=gi:1002914 TID=Os.414.1 CNT=19 FEA=FLmRNA TIER=FL STK=5 UG=Os.414 DEF=Oryza sativa cap-binding protein p26 mRNA, complete cds. PROD=p26 FL=gb:AK099169.1 gb:AK069207.1 gb:U34597.1 REP_ORG=O. sativa	LOC_Os01g73880		unspliced-genomic eukaryotic translation initiation factor 4E-1, putative, expressed		AT4G18040	4e-82	254654_at
Os.1852.1.S1_at	2537.9	3654.5	1071.2	438.7	651.8	778	2421	3974.3	1579.2	382.7	10.8	0.00188	0.00852646		3408.1	4405	2276.2	253.1	491.9	696.5	2234.1	3763.2	2252.7	250.3	11.2	0.00023	0.00185009		0.935473	11		gb:AF039531.1 DB_XREF=gi:2801535 GEN=LPL1 TID=Os.1852.1 CNT=5 FEA=FLmRNA TIER=FL STK=5 UG=Os.1852 DEF=Oryza sativa lysophospholipase homolog (LPL1) mRNA, complete cds. PROD=lysophospholipase homolog FL=gb:AF039531.1 REP_ORG=O. sativa	LOC_Os09g23150		unspliced-genomic monoglyceride lipase, putative, expressed		AT1G73480	2e-111	245734_at
Os.138.1.S1_at	8237.3	7803	13048.5	15376.7	13467.6	11958.5	9254	7886.3	12464	14035.8	21.6	0.00017	0.00277329		4551	6534.1	13322.6	15996.7	13056.6	14044	8517.4	8485.9	12079.4	14932	21.6	0.00367	0.00319969		0.940335	21.6		gb:D12821.1 DB_XREF=gi:218160 TID=Os.138.1 CNT=127 FEA=FLmRNA TIER=FL STK=4 UG=Os.138 DEF=Oryza sativa (japonica cultivar-group) mRNA for elongation factor 1 beta, complete cds. PROD=elongation factor 1 beta FL=gb:AK061761.1 gb:AK121942.1 gb:D12	LOC_Os07g46750		unspliced-genomic elongation factor 1-beta, putative, expressed		AT5G19510	7e-64	245949_at
Os.5507.1.S1_at	3516.2	4857.4	8477.6	10486.6	7210.6	7388.4	3960.1	3944.4	7073	8965.9	20.8	0.00126	0.00271345		2060.9	3453.5	7692.1	9623.5	7208.1	7359.3	4180.1	4165.1	7611.2	8198.9	21.2	0.00211	0.00384806		0.957928	21		gb:D12630.1 DB_XREF=gi:303852 TID=Os.5507.1 CNT=68 FEA=FLmRNA TIER=FL STK=4 UG=Os.5507 DEF=Oryza sativa (japonica cultivar-group) mRNA for ribosomal protein L3, complete cds. PROD=ribosomal protein L3 FL=gb:D12630.1 gb:AK060925.1 REP_ORG=O. sat	LOC_Os12g07010		unspliced-genomic 60S ribosomal protein L3, putative, expressed		AT1G43170	0	264421_at
Os.7835.1.S1_a_at	18071.3	19105.4	20490	18800.3	13795.8	10908.7	13032.6	21500.2	19816.4	20292.2	15.6	0.00424	0.00497644		14050.8	22274.8	23688.3	19801.5	12790.7	10552.2	11653.6	21325.1	19558.8	17601.9	15.6	0.00053	0.00189377		0.882177	15.6		gb:AK066092.1 DB_XREF=gi:32976110 TID=Os.7835.1 CNT=48 FEA=FLmRNA TIER=FL STK=4 UG=Os.7835 UG_TITLE=(japonica cultivar-group) mRNA for glyoxalase I, complete cds DEF=Oryza sativa (japonica cultivar-group) cDNA clone:J013055G04, full insert sequen	LOC_Os08g09250		unspliced-genomic lactoylglutathione lyase, putative, expressed		AT1G11840	5e-125	264372_at
Os.4765.1.S2_at	2989.5	3437.7	5774.6	6933.4	4948.1	6713.7	3648.8	4371.2	7188	7475.1	20.8	0.02465	0.0261851		2312.9	3608.5	7673.1	7219.6	6759.1	6584.8	3585.1	4458.5	7064	7107.4	20.8	0.00541	0.00783829		0.894018	20.8		gb:D89802.1 DB_XREF=gi:3868757 TID=Os.4765.1 CNT=74 FEA=FLmRNA TIER=FL STK=4 UG=Os.4765 DEF=Oryza sativa mRNA for elongation factor 1B gamma, complete cds. PROD=elongation factor 1B gamma FL=gb:AK103901.1 gb:AK104946.1 gb:AK061944.1 gb:D89802.1	LOC_Os02g12794		unspliced-genomic elongation factor 1-gamma 2, putative, expressed		AT1G09640	4e-100	264670_s_at
Os.4765.1.S1_s_at	2605.7	2787.6	6929.1	6389.2	6137.3	5666.5	3101.8	4266.2	7212.7	7533.6	20.4	0.00316	0.00883587		1839.8	3369.8	6402.7	7541.3	6493	6435.2	3282.3	4554.8	7345	7699.2	20.8	0.00234	0.00414101		0.963452	20.6		gb:AK104946.1 DB_XREF=gi:32990155 TID=Os.4765.1 CNT=74 FEA=FLmRNA TIER=FL STK=1 UG=Os.4765 UG_TITLE=MRNA for elongation factor 1B gamma, complete cds DEF=Oryza sativa (japonica cultivar-group) cDNA clone:001-108-F01, full insert sequence. FL=gb:	LOC_Os02g12794		unspliced-genomic elongation factor 1-gamma 2, putative, expressed		AT1G09640	4e-100	264670_s_at
Os.4696.1.S1_at	8400.6	6045.1	10099.2	12898.4	12931.9	14206.8	11336.1	6073.5	9689.1	12549.3	0.4	0.00303	0.00555457		5705.1	4587.5	9879.6	13973.6	12485.3	13159.5	9874.1	5679.1	9634.3	12123.6	23.2	0.0036	0.00312378		0.95901	23.8		gb:D12631.1 DB_XREF=gi:303854 TID=Os.4696.1 CNT=42 FEA=FLmRNA TIER=FL STK=4 UG=Os.4696 DEF=Oryza sativa (japonica cultivar-group) mRNA for ribosomal protein L7A, complete cds. PROD=ribosomal protein L7A FL=gb:D12631.1 gb:AK121204.1 gb:AK062210.1	LOC_Os08g23710		unspliced-genomic 60S ribosomal protein L7a, putative, expressed		AT3G62870	7e-101	251185_at
Os.6805.1.A1_at	5788.2	7895.5	7136.3	5422.9	3934.9	3803.7	4516	6823	7779.7	5944.7	14.4	0.00023	0.00100683		5389.5	8250.2	7025.1	4549.9	3717	3398.8	4229.3	7950.8	7780.8	5889.5	14	0.00048	0.00191921		0.968869	14.2		gb:AY282740.1 DB_XREF=gi:30908920 TID=Os.6805.1 CNT=28 FEA=FLmRNA TIER=FL STK=4 UG=Os.6805 DEF=Oryza sativa (japonica cultivar-group) putative zinc finger transcription factor ZFP33 mRNA, complete cds. PROD=putative zinc finger transcription fact	LOC_Os07g07350		unspliced-genomic zinc finger A20 and AN1 domains-containing protein, putative, expressed		AT2G36320	2e-37	263901_at
Os.10595.1.S1_at	4118.6	4265.4	3528.6	3698.4	4052.8	4703.3	4561.5	3093.6	2818.8	3622.5	4.4	0.02163	0.0211765		5396.9	4005.3	3310.5	3284.4	3725.6	4296.9	4825.9	3230.3	3265.8	3915.2	6	0.02538	0.029405		0.707168	5.2		gb:AK121891.1 DB_XREF=gi:37991514 TID=Os.10595.1 CNT=37 FEA=FLmRNA TIER=FL STK=4 UG=Os.10595 UG_TITLE=MRNA for kinase-like protein, complete cds DEF=Oryza sativa (japonica cultivar-group) cDNA clone:J033105C13, full insert sequence. FL=gb:AK1018	LOC_Os02g38980		unspliced-genomic global transcription factor group E, putative, expressed		AT5G14270	1e-76	250191_at
Os.10696.1.S1_at	18366.8	22682.1	23100.7	26104.7	28041.8	23975.1	21371.8	22772.1	25891.5	28071.1	21.2	0.00405	0.00497497		19878.6	22220.1	25451.4	27756.8	28528.5	22018.3	23926.9	24059.2	24454.7	27969.3	20.8	0.00759	0.00991419		0.86388	21		gb:D17790.1 DB_XREF=gi:409782 TID=Os.10696.1 CNT=32 FEA=FLmRNA TIER=FL STK=4 UG=Os.10696 DEF=Oryza sativa (japonica cultivar-group) mRNA for ferredoxin-NADP+ reductase, complete cds. PROD=ferredoxin-NADP+ reductase FL=gb:D17790.1 gb:AK065063.1 g	LOC_Os06g01850		unspliced-genomic ferredoxin--NADP reductase, leaf isozyme, chloroplast precursor, putative, expressed		AT1G20020	6e-155	261218_at
Os.5522.1.S1_at	3269.8	6000.9	6722.7	4776.3	3230.4	3164.1	2546.2	5892.9	8199.7	5924.7	16	0.001	0.00360552		3878.5	6906.5	10805.5	7636.2	3822.1	4628.5	4332.7	7774.3	9007.6	7040	16	0.00112	0.0153743		0.886873	16		gb:D85239.1 DB_XREF=gi:1805501 TID=Os.5522.1 CNT=25 FEA=FLmRNA TIER=FL STK=4 UG=Os.5522 DEF=Oryza sativa (japonica cultivar-group) mRNA for plastidic copperzinc-superoxide dismutase, complete cds. PROD=superoxide dismutase precusor FL=gb:AK10401	LOC_Os08g44770		unspliced-genomic superoxide dismutase, chloroplast precursor, putative, expressed		AT2G28190	9e-71	266165_at
Os.9042.1.S1_at	1669.2	1085.3	1262.7	2539.3	2919.1	3440.7	2671.2	1101.9	1439.1	1890.6	2	0.00131	0.00152373		1513.4	942.5	1235.3	2126.9	2936.9	3367	2450	974.7	1208.2	1648.6	2	0.0006	0.000957511		0.989312	2		gb:AY576526.1 DB_XREF=gi:46326982 GEN=SGP TID=Os.9042.1 CNT=24 FEA=FLmRNA TIER=FL STK=4 UG=Os.9042 DEF=Oryza sativa (japonica cultivar-group) ethylene-responsive small GTP-binding protein (SGP) mRNA, complete cds. PROD=ethylene-responsive small	LOC_Os03g60530		unspliced-genomic ras-related protein ARA-3, putative, expressed		AT3G46060	5e-71	252514_at
Os.10987.1.S1_at	464.6	700.3	1778.9	2302.1	1713.3	1504.2	480.4	812.5	1966.3	2201.3	20.8	8e-05	0.00296606		184.6	709.2	1806.1	2056.3	1325.7	1341.3	355.4	805.6	2173.2	2244.7	20	0.0008	0.00412926		0.972242	20.4		gb:AF303468.1 DB_XREF=gi:21685575 GEN=tufM TID=Os.10987.1 CNT=27 FEA=FLmRNA TIER=FL STK=4 UG=Os.10987 DEF=Oryza sativa elongation factor Tu (tufM) mRNA, complete cds; nuclear gene for mitochondrial product. PROD=elongation factor Tu FL=gb:AK058	LOC_Os03g63410		unspliced-genomic elongation factor Tu, mitochondrial precursor, putative, expressed		AT4G02930	0	255455_at
Os.2407.1.S1_at	1654.1	4953.1	1872.7	683.2	230.2	362.6	2114.4	2548.6	2305.1	683.5	12.4	0.00764	0.0127073		1469.8	5659.6	2794	577.1	159.9	167.9	996.4	2955.8	1549.1	373.2	12.8	0.02116	0.014092		0.941077	12.6		gb:AF140722.2 DB_XREF=gi:33414598 TID=Os.2407.1 CNT=18 FEA=FLmRNA TIER=FL STK=4 UG=Os.2407 DEF=Oryza sativa (indica cultivar-group) multiple stress-responsive zinc-finger protein mRNA, complete cds. PROD=multiple stress-responsive zinc-finger pro	LOC_Os09g31200		unspliced-genomic multiple stress-responsive zinc-finger protein ISAP1, putative, expressed		AT3G12630	2e-34	256231_at
Os.2240.1.S1_at	670.6	743.2	901.7	1775.2	1558.8	1106.1	791.3	1017.2	1047.5	1697	22	0.0013	0.00664489		440.5	836.1	838.9	1700.5	1243.8	1056.3	564.3	922.7	768.5	1516.2	21.6	0.00943	0.0114826		0.951181	21.8		gb:U46758.1 DB_XREF=gi:1197586 GEN=KOB1 TID=Os.2240.1 CNT=16 FEA=FLmRNA TIER=FL STK=4 UG=Os.2240 DEF=Oryza sativa potassium channel beta subunit protein (KOB1) mRNA, complete cds. PROD=potassium channel beta subunit protein FL=gb:U46758.1 gb:AK	LOC_Os02g57240		unspliced-genomic voltage-gated potassium channel beta subunit, putative, expressed		AT1G04690	4e-167	264607_at
Os.1983.1.S1_at	10629.3	10272.7	11730.3	14833	13637.4	13477.8	12905	9246.5	10270	14771.6	23.6	0.00748	0.0105688		11371.5	10701.4	9380.9	10615.6	13656.9	12328.6	12318.2	9987.7	8916.9	12257	2.4	0.00477	0.00733088		0.604609	1		gb:AB007627.2 DB_XREF=gi:14090232 GEN=HOS58 TID=Os.1983.1 CNT=14 FEA=FLmRNA TIER=FL STK=4 UG=Os.1983 UG_TITLE=(japonica cultivar-group) HOS58 mRNA, complete cds DEF=Oryza sativa (japonica cultivar-group) HOS58 mRNA, complete cds. FL=gb:AB007627	LOC_Os02g08544	HB	unspliced-genomic homeobox protein knotted-1-like 3, putative, expressed		AT5G25220	1e-113	246930_at
Os.3583.1.S1_at	1225.4	1452.1	4030.6	3754.6	3015.2	2526.7	2209.3	1044.5	3226.8	5249	20.8	0.00665	0.00752278		1032.4	1251.3	3621.2	3828.4	3046.6	2392.4	1828.1	1844	4037	6093	20.4	0.00418	0.00899325		0.949196	20.6		gb:AB014056.1 DB_XREF=gi:4164148 GEN=iron-superoxide dismutase TID=Os.3583.1 CNT=16 FEA=FLmRNA TIER=FL STK=4 UG=Os.3583 DEF=Oryza sativa (japonica cultivar-group) mRNA for iron-superoxide dismutase, complete cds. PROD=iron-superoxide dismutase	LOC_Os06g05110		unspliced-genomic superoxide dismutase, chloroplast, putative, expressed		AT5G23310	3e-93	249826_at
Os.3122.1.S1_at	537.7	738.7	1491.9	654.3	467.4	405	460.6	1470.9	1901.5	1520.9	16	0.01564	0.00562774		266.2	1175.7	2328.5	1284	632	551.1	439.3	2554.4	2352.3	1169	15.6	0.00927	0.00614851		0.863445	15.8		gb:AY028315.1 DB_XREF=gi:13508484 TID=Os.3122.1 CNT=13 FEA=FLmRNA TIER=FL STK=4 UG=Os.3122 DEF=Oryza sativa ADP-glucose pyrophosphorylase small subunit mRNA, complete cds. PROD=ADP-glucose pyrophosphorylase small subunit FL=gb:AK060270.1 gb:AY02	LOC_Os09g12660		unspliced-genomic glucose-1-phosphate adenylyltransferase small subunit, chloroplast precursor, putative, expressed		AT5G48300	0	248687_at
Os.37640.1.S1_at	1909.9	1719.9	2323.5	1472.5	1298.8	901.8	1239.7	1949.9	1731.8	2124.6	15.2	0.05206	0.0144243		2154.8	1978.9	2155.2	1856.3	1616.9	1161.6	1374.4	2731.6	2290.5	2186.8	14.8	0.0408	0.0220656		0.834272	15		gb:U33283.1 DB_XREF=gi:1109671 TID=Os.37640.1 CNT=12 FEA=FLmRNA TIER=FL STK=4 UG=Os.37640 DEF=Oryza sativa Ca2+ sensitive 3(2),5-diphosphonucleoside 3(2) phosphohydrolase mRNA, complete cds. PROD=3(2),5-diphosphonucleoside 3(2)phosphohydrolase F	LOC_Os12g08280		unspliced-genomic expressed protein		AT5G63980	1e-119	247313_at
Os.3739.1.S1_at	1290.2	1266.4	2339.2	1574.4	1149.8	1046	1070.8	1254.7	2058.5	1585.6	16.8	0.01708	0.0208015		1688	1458.5	2645	1866.3	1604	1040.1	1474.5	1274.8	2609.5	1865.6	17.2	0.05276	0.0370763		0.947844	17		gb:AB022783.1 DB_XREF=gi:7415520 GEN=OsproT TID=Os.3739.1 CNT=9 FEA=FLmRNA TIER=FL STK=4 UG=Os.3739 DEF=Oryza sativa mRNA for amino acid permease, complete cds. PROD=amino acid permease FL=gb:AB022783.1 gb:AK067118.1 gb:AK062005.1 REP_ORG=O. s	LOC_Os03g44230		unspliced-genomic proline transporter, putative, expressed		AT2G39890	1e-174	267358_at
Os.4176.1.S1_at	118.8	122.3	367.1	607	528.9	325.2	197	126.9	269.4	855.1	22	0.0014	0.0105095		164.2	110.4	325.7	1128.5	553.5	276.8	128.9	142.2	322.3	895.2	21.6	0.00402	0.0120117		0.896754	21.8		gb:AB022602.1 DB_XREF=gi:5360656 GEN=OsASA1 TID=Os.4176.1 CNT=8 FEA=FLmRNA TIER=FL STK=4 UG=Os.4176 DEF=Oryza sativa (japonica cultivar-group) OsASA1 mRNA for anthranilate synthase alpha 1 subunit, complete cds. PROD=anthranilate synthase alpha	LOC_Os03g61120		unspliced-genomic anthranilate synthase component I-1, chloroplast precursor, putative, expressed		AT5G05730	0	250738_at
Os.3383.1.S1_a_at	1391.3	1836.7	2996.9	3976.5	3358.3	2576.1	1715	1414.7	2272	3468.2	21.6	9e-05	0.000484892		1263.9	1261.5	2479.8	3575.5	3332.8	2808.8	1999.2	1455.4	2558.5	3717.2	22.4	5e-05	0.00110076		0.933559	22		gb:AB018442.1 DB_XREF=gi:4190973 GEN=phyC TID=Os.3383.1 CNT=10 FEA=FLmRNA TIER=FL STK=4 UG=Os.3383 DEF=Oryza sativa (japonica cultivar-group) mRNA for phytochrome C, complete cds. PROD=phytochrome C FL=gb:AB018442.1 REP_ORG=O. sativa	LOC_Os03g54084		unspliced-genomic phytochrome C, putative, expressed		AT5G35840	0	249666_at
Os.20364.1.S1_at	779.7	939.7	2495.1	3101.5	1302	961.6	524	778.5	2350.7	2143.4	19.2	0.0018	0.00787223		513.9	484.9	1360.3	2473.7	1206.3	1061.6	533.9	704.7	1845.1	1956.5	20.4	0.00159	0.0102608		0.925529	19.8		gb:AB051864.1 DB_XREF=gi:19909967 GEN=OsAMT2;1 TID=Os.20364.1 CNT=5 FEA=FLmRNA TIER=FL STK=4 UG=Os.20364 DEF=Oryza sativa OsAMT2;1 mRNA for ammonium transporter, complete cds. PROD=ammonium transporter FL=gb:AK065288.1 gb:AB051864.1 REP_ORG=O.	LOC_Os05g39240		unspliced-genomic ammonium transporter 2, putative, expressed		AT2G38290	2e-174	267142_at
Os.7899.1.S1_at	4973.3	5423.9	3255.3	1968.2	2190.4	2772.1	2379	5992.3	4873.3	1652.4	11.6	0.01841	0.0144755		4124.6	5657	3281	1970.8	2379.7	2451.7	2499.5	6010.2	4164	1728.7	12	0.01383	0.0179094		0.972376	11.8		gb:AB074412.1 DB_XREF=gi:20152204 GEN=OsUBC5b TID=Os.7899.1 CNT=39 FEA=FLmRNA TIER=FL STK=4 UG=Os.7899 DEF=Oryza sativa (japonica cultivar-group) mRNA for ubiquitin-conjugating enzyme OsUBC5b, complete cds. PROD=ubiquitin-conjugating enzyme OsUB	LOC_Os02g16040		unspliced-genomic ubiquitin-conjugating enzyme E2-17 kDa, putative, expressed		AT1G64230	4e-84	262341_at
Os.7900.1.S1_at	1508.6	1735.6	2102.6	1722.2	1522.5	1335.4	1290.2	1761	1834.3	2071.5	16.8	0.00248	0.00265354		1310.3	1490.9	1867.7	2023	1446.9	1367.7	1291.2	1975.8	1833.1	1809.5	17.2	0.00806	0.0108925		0.759977	17		gb:AB026559.1 DB_XREF=gi:8671493 GEN=OsPAB1 TID=Os.7900.1 CNT=28 FEA=FLmRNA TIER=FL STK=4 UG=Os.7900 DEF=Oryza sativa (japonica cultivar-group) OsPAB1 mRNA for alpha 2 subunit of 20S proteasome, complete cds. PROD=alpha 2 subunit of 20S proteaso	LOC_Os03g26970		unspliced-genomic proteasome subunit alpha type 2, putative, expressed		AT1G16470	2e-117	262716_at
Os.2219.1.S1_at	385.1	361.4	254.4	471.8	1011.4	2168.5	499.1	248.7	328.8	548.8	2.4	0.03272	0.0252895		338.9	203.4	200.2	646.7	821.8	1712.6	490.8	238.6	273.6	284	2.4	0.02411	0.0131082		0.97147	2.4		gb:AF072694.1 DB_XREF=gi:3293558 GEN=GER7 TID=Os.2219.1 CNT=5 FEA=FLmRNA TIER=FL STK=4 UG=Os.2219 DEF=Oryza sativa germin-like protein 7 (GER7) mRNA, complete cds. PROD=germin-like protein 7 FL=gb:AK062698.1 gb:AF072694.1 REP_ORG=O. sativa	LOC_Os03g58980		unspliced-genomic germin-like protein subfamily T member 2 precursor, putative, expressed		AT1G18970	5e-50	259481_at
Os.178.1.S1_a_at	5232	6363.4	4297.4	2673.3	4507.4	4571.3	5464.5	5111.2	4069.8	3710.1	9.2	0.01148	0.0266349		6960.1	6180.3	4728.4	3914.3	5942.1	4810.7	5960.3	6870.7	3978.8	3718.8	8.4	0.02851	0.0245329		0.78588	8.8		gb:J04960.1 DB_XREF=gi:169758 TID=Os.178.1 CNT=5 FEA=FLmRNA TIER=FL STK=4 UG=Os.178 UG_TITLE=O.sativa ADP-glucose pyrophosphorylase 51kD subunit mRNA, complete cds DEF=O.sativa ADP-glucose pyrophosphorylase 51kD subunit mRNA, complete cds. FL=gb	LOC_Os08g25734		unspliced-genomic glucose-1-phosphate adenylyltransferase small subunit, chloroplast precursor, putative, expressed		AT5G48300	0	248687_at
Os.1502.1.S1_at	2659.8	1722.2	1356.1	1299.6	1490.5	1837.4	1797.5	2028.8	1550.3	1186.4	8	0.01146	0.00522486		2298.7	1370.7	1088.4	1021.6	1272	1304.2	1755.8	1379.1	994	903.9	7.2	0.01008	0.0204581		0.909423	7.6		gb:AB053473.1 DB_XREF=gi:13365771 GEN=RISBZ4 TID=Os.1502.1 CNT=4 FEA=FLmRNA TIER=FL STK=4 UG=Os.1502 DEF=Oryza sativa mRNA for RISBZ4, complete cds. PROD=RISBZ4 FL=gb:AB053473.1 gb:AK069575.1 REP_ORG=O. sativa	LOC_Os02g07840	bZIP	unspliced-genomic regulatory protein opaque-2, putative, expressed		AT5G24800	3e-30	246962_s_at
Os.186.1.S1_at	6261.7	8533.8	4534.3	2048.3	2569.1	3437.8	4961.9	10585.7	6708	1828.7	11.6	0.00346	0.00929601		8715.5	8583.8	8383.4	2824.1	1941.8	4178.5	6120.9	8773.3	7400.9	1399.9	11.6	0.00053	0.00795367		0.852608	11.6		gb:L36320.1 DB_XREF=gi:538429 GEN=cuznsod1 TID=Os.186.1 CNT=101 FEA=FLmRNA TIER=FL STK=3 UG=Os.186 DEF=Oryza sativa (clone cu101) superoxide dismutase (cuznsod1) mRNA, complete cds. PROD=superoxide dismutase FL=gb:L36320.1 gb:D00999.1 gb:AK0616	LOC_Os03g22810		unspliced-genomic superoxide dismutase 1, putative, expressed		AT1G08830	7e-70	264809_at
Os.4244.1.S1_at	6194.4	8571	6071.4	2510.3	3893.6	4294.1	4232.5	8471.6	6114.5	2043.7	11.6	0.01012	0.0177624		3845.6	8993	5585.8	3501.1	2281.8	5433.9	3811	8019.8	4436.4	1132	11.6	0.05571	0.0288505		0.879777	11.6		gb:AB110168.1 DB_XREF=gi:32352133 TID=Os.4244.1 CNT=91 FEA=FLmRNA TIER=FL STK=3 UG=Os.4244 DEF=Oryza sativa (japonica cultivar-group) mRNA for caffeoyl-CoA 3-O-methyltransferase, complete cds, clone: 12FPR057. PROD=caffeoyl-CoA 3-O-methyltransfer	LOC_Os08g38900		unspliced-genomic caffeoyl-CoA O-methyltransferase 1, putative, expressed		AT4G34050	1e-64	253276_at
Os.182.1.S1_at	12660.4	10808.4	9700.7	16083.8	15130.5	16350.7	10346.2	8412	10267.7	13482.6	0.8	0.00298	0.00441443		10590.2	6661.4	6238.4	13726.1	12348.5	13488.8	9462	5986.3	10579	12814.8	0.4	0.00694	0.00804703		0.893705	0.6		gb:AF441191.1 DB_XREF=gi:17066589 GEN=CaM TID=Os.182.1 CNT=46 FEA=FLmRNA TIER=FL STK=3 UG=Os.182 DEF=Oryza sativa clone 15079 calmodulin (CaM) mRNA, complete cds. PROD=calmodulin FL=gb:AK071852.1 gb:AF441191.1 gb:AK104031.1 REP_ORG=O. sativa	LOC_Os07g48780		unspliced-genomic calmodulin, putative, expressed		AT3G43810	2e-81	252713_at
Os.3705.1.S1_at	4719.8	3788.6	4416.6	5541.6	5517	4934.1	5172.2	5041.7	4452.5	5402.3	0.4	0.07282	0.0407463		3162.1	3674.1	3803.7	5706	5047.3	4963.3	4528.1	4232.5	4116.4	4437	23.6	0.06983	0.011604		0.726495	0		gb:AB026561.1 DB_XREF=gi:8671497 GEN=OsPAE1 TID=Os.3705.1 CNT=50 FEA=FLmRNA TIER=FL STK=3 UG=Os.3705 DEF=Oryza sativa (japonica cultivar-group) OsPAE1 mRNA for alpha 5 subunit of 20S proteasome, complete cds. PROD=alpha 5 subunit of 20S proteaso	LOC_Os11g40140		unspliced-genomic proteasome subunit alpha type 5, putative, expressed		AT1G53850	3e-127	262258_at
Os.12197.2.S1_a_at	11842	23197.7	19757.7	17574.7	13387.5	12976.3	15840.4	21120.3	22315.6	17891.8	14.8	0.0028	0.0054846		7777.7	23644	20838	19985.2	11379.8	11492.2	6192.3	16633.2	21120.2	15495	16.4	0.0116	0.0140224		0.842713	15.6		gb:AK068753.1 DB_XREF=gi:32978778 TID=Os.12197.2 CNT=6 FEA=FLmRNA TIER=FL STK=1 UG=Os.12197 UG_TITLE=(japonica cultivar-group) mRNA for hypothetical protein, complete cds, clone: 13YPB022 DEF=Oryza sativa (japonica cultivar-group) cDNA clone:J013	LOC_Os03g23010		unspliced-genomic expressed protein		AT2G41430	4e-15	267104_at
Os.12197.1.S1_x_at	5758.6	16138.5	15253.8	13030.7	9916.2	7260.7	8885.8	13218.5	16048.2	11678.3	16	0.00252	0.00721022		3340	15153.9	16766.9	14604.9	7301	7067.4	2910.6	10550.9	16811.9	12429.7	16.8	0.00169	0.00656074		0.918831	16.4		gb:AB110172.1 DB_XREF=gi:32352141 TID=Os.12197.1 CNT=38 FEA=FLmRNA TIER=FL STK=3 UG=Os.12197 UG_TITLE=(japonica cultivar-group) mRNA for hypothetical protein, complete cds, clone: 13YPB022 DEF=Oryza sativa (japonica cultivar-group) mRNA for hypot	LOC_Os03g23010		unspliced-genomic expressed protein		AT2G41430	4e-15	267104_at
Os.7916.1.S1_at	189.8	280	539	426	136.9	79.6	101.7	145.3	401.2	474.4	17.6	0.00321	0.00280905		159.4	357.9	443.5	338.6	119.5	124.1	55.2	309.6	345.6	196.2	15.6	0.00407	0.00346526		0.720796	16.6		gb:D30716.1 DB_XREF=gi:493707 TID=Os.7916.1 CNT=61 FEA=FLmRNA TIER=FL STK=3 UG=Os.7916 DEF=Oryza sativa (japonica cultivar-group) mRNA for beta-tubulin, complete cds. PROD=beta-tubulin FL=gb:L19598.1 gb:AK072502.1 gb:D30716.1 REP_ORG=O. sativa	LOC_Os01g59150		unspliced-genomic tubulin beta-4 chain, putative, expressed		AT5G12250	0	250317_at
Os.8519.1.S1_a_at	602.4	1279.4	3383.3	3405.9	1906.4	1513.1	453.1	1546.8	3541.2	4465.9	19.2	0.00026	0.00165268		299.2	1395.8	4030.7	3588.9	1694.4	1666	382.2	1765.7	3517.4	4077.1	18.8	0.00028	0.00304215		0.978179	19		gb:AK072845.1 DB_XREF=gi:32982868 TID=Os.8519.1 CNT=39 FEA=FLmRNA TIER=FL STK=3 UG=Os.8519 UG_TITLE=Putative histone deacetylase HD2 mRNA, complete cds DEF=Oryza sativa (japonica cultivar-group) cDNA clone:J023142J09, full insert sequence. FL=gb	LOC_Os05g51830	C2H2	unspliced-genomic histone deacetylase 2b, putative, expressed		AT5G22650	6e-23	249901_at
Os.458.1.S1_at	4639.6	4078.6	4597	5313	5534.3	6500.6	4225.4	4234.4	4679.8	5389.2	0.8	0.00746	0.0124496		3946.3	3609.8	3454.2	4684.2	4647.2	5442.6	3907.9	3376	4111.4	4960.9	0.8	0.00547	0.00729735		0.93184	0.8		gb:AB046414.1 DB_XREF=gi:12381895 GEN=eIF4A-2 TID=Os.458.1 CNT=48 FEA=FLmRNA TIER=FL STK=3 UG=Os.458 DEF=Oryza sativa eIF4A-2 mRNA for eukaryotic initiation factor 4A, complete cds. PROD=eukaryotic initiation factor 4A FL=gb:AK073620.1 gb:AB046	LOC_Os02g05330		unspliced-genomic eukaryotic initiation factor 4A, putative, expressed		AT3G13920	0	258210_at
Os.7976.1.S1_a_at	11020.3	6964.4	4532.9	4280.2	5475.7	6026.4	10184.3	7133.9	4621.4	4950.4	7.6	0.00456	0.0106028		11548.7	7171.4	4352.2	4324.2	5989	5678.2	10724.6	8402.1	3971.9	4000.7	7.6	0.00414	0.00769423		0.980916	7.6		gb:AY524972.1 DB_XREF=gi:42528294 GEN=BIHD1 TID=Os.7976.1 CNT=27 FEA=FLmRNA TIER=FL STK=3 UG=Os.7976 DEF=Oryza sativa (indica cultivar-group) benzothiadiazole-induced homeodomain protein 1 (BIHD1) mRNA, complete cds. PROD=benzothiadiazole-induce	LOC_Os03g47740	HB	unspliced-genomic BEL1-related homeotic protein 30, putative, expressed		AT4G34610	5e-94	253247_at
Os.2674.1.S1_at	5561	3953	4743.5	5515.9	6082	6225.3	6186.4	4270.8	4772.7	4499.4	2.8	0.01084	0.0071979		4966	3509.9	3929.9	5506.1	5949.3	5818.3	6596.7	4157.4	4878.6	4519.4	2.4	0.04699	0.0134201		0.931964	2.6		gb:D38753.1 DB_XREF=gi:976256 TID=Os.2674.1 CNT=41 FEA=FLmRNA TIER=FL STK=3 UG=Os.2674 DEF=Oryza sativa (japonica cultivar-group) mRNA stearyl-ACP desaturase, complete cds. PROD=stearyl-ACP desaturase FL=gb:D38753.1 gb:AK065340.1 REP_ORG=O. sat	LOC_Os04g31070		unspliced-genomic acyl-desaturase, chloroplast precursor, putative, expressed		AT2G43710	8e-172	260570_at
Os.4684.1.S1_at	4183.2	5892.6	10604.6	12202.8	7711.3	7515.3	3408.4	5652.7	9496	11993.9	20	0.00025	0.00241272		1743.9	3745.7	9505.7	11599.1	6794.1	6927.9	2565.4	5145.8	9033.1	10084.1	20	0.00056	0.00456205		0.976668	20		gb:D38231.1 DB_XREF=gi:540534 GEN=RWD TID=Os.4684.1 CNT=39 FEA=FLmRNA TIER=FL STK=3 UG=Os.4684 DEF=Oryza sativa (japonica cultivar-group) RWD mRNA for q group of receptor for activated C-kinase, complete cds. PROD=q group of receptor for activat	LOC_Os01g49290		unspliced-genomic guanine nucleotide-binding protein beta subunit-like protein, putative, expressed		AT3G18130	7e-136	258155_at
Os.12646.1.S1_at	2567.1	1935.2	1342.5	693.1	950.2	1327.5	1779.7	2555.5	1414.3	842.6	10	0.00142	0.00284089		2791.8	2908.5	1374.9	645.6	857.4	1303.7	1611.1	2339.7	1048.6	770.1	10	0.00453	0.00424741		0.904135	10		gb:AB125305.1 DB_XREF=gi:46917335 GEN=SAPK4 TID=Os.12646.1 CNT=25 FEA=FLmRNA TIER=FL STK=3 UG=Os.12646 DEF=Oryza sativa (japonica cultivar-group) SAPK4 mRNA for serinethreonine protein kinase SAPK4, complete cds. PROD=serinethreonine protein kin	LOC_Os01g64980		unspliced-genomic ion channel DMI1, chloroplast precursor, putative, expressed		AT5G49960	0	248584_at
Os.3439.1.S1_a_at	4067	2888.3	3344.7	4479.2	4883.5	5330.5	3583.6	3788.8	4001.6	4197.7	1.2	0.00695	0.0098211		2511.3	2439.1	3096.9	4718.4	3787	4816.9	2840.3	2832.1	3560.9	3426.2	23.6	0.04349	0.0213478		0.810927	0.4		gb:AB027123.1 DB_XREF=gi:4850329 GEN=COX5c TID=Os.3439.1 CNT=19 FEA=FLmRNA TIER=FL STK=3 UG=Os.3439 DEF=Oryza sativa (japonica cultivar-group) COX5c mRNA for cytochrome c oxidase subunit 5c, complete cds. PROD=cytochrome c oxidase subunit 5c FL	LOC_Os12g37419		unspliced-genomic cytochrome c oxidase polypeptide Vc, putative, expressed		AT5G61310	4e-26	247520_at
Os.10220.1.S1_at	2904.9	2997.2	1113.2	965.6	1366.9	2395.4	1828.4	2359.9	1394.6	1043.3	8.4	0.00909	0.0157154		4436.1	2186.2	1327	969.5	1328.7	2831.2	2266.8	2190.3	1687.3	1495.1	7.2	0.022	0.0203088		0.804316	7.8		gb:AB051295.1 DB_XREF=gi:17025919 GEN=OsNIF2 TID=Os.10220.1 CNT=28 FEA=FLmRNA TIER=FL STK=3 UG=Os.10220 DEF=Oryza sativa OsNIF2 mRNA for bZIP transcription factor, complete cds. PROD=bZIP transcription factor FL=gb:AB051295.1 gb:AK100440.1 REP	LOC_Os07g48820	bZIP	unspliced-genomic transcription factor HBP-1b, putative, expressed		AT5G06950	7e-105	250671_at
Os.3437.1.S1_at	2996.6	4286.5	3934.7	3662.4	3134.4	3399.4	2487.6	4774.1	4566.9	3706.3	15.2	0.04433	0.0350389		3516.6	4837	5063.4	4423	3257	3389.2	2941.1	5557.9	5711.7	4031.5	15.2	0.00304	0.00646823		0.948581	15.2		gb:AB042115.1 DB_XREF=gi:7670065 GEN=cope1 TID=Os.3437.1 CNT=27 FEA=FLmRNA TIER=FL STK=3 UG=Os.3437 DEF=Oryza sativa (japonica cultivar-group) cope1 mRNA for epsilon1-COP, complete cds. PROD=epsilon1-COP FL=gb:AK104427.1 gb:AK099008.1 gb:AK0607	LOC_Os04g52270		unspliced-genomic coatomer subunit epsilon, putative, expressed		AT1G30630	7e-132	263223_at
Os.2216.1.S1_at	1587.1	2738	10385	5585.7	4611.9	1154	1155.8	3395.6	9591	5147.1	17.6	0.00774	0.0170831		1792.9	2820.5	11404.2	4706.4	3071.6	1371	1292.4	3147.1	10421.8	6288.2	17.2	0.01168	0.0198801		0.976464	17.4		gb:U37936.1 DB_XREF=gi:1235663 TID=Os.2216.1 CNT=19 FEA=FLmRNA TIER=FL STK=3 UG=Os.2216 DEF=Oryza sativa clone pFDRSC61 novel calmodulin-like protein mRNA, complete cds. PROD=novel calmodulin-like protein FL=gb:AF231026.1 gb:U37936.1 gb:AK070889	LOC_Os01g59530		unspliced-genomic calmodulin-related protein, putative, expressed		AT3G56800	4e-68	246290_at
Os.2613.1.S1_at	2203.8	1238.6	1617.5	2791.5	2722.9	2775.4	2634.5	1023.6	1481	2317.2	1.6	0.00303	0.00680448		1976.6	1200.6	1360.6	3130.6	3035.4	2217.5	2288.1	1027.8	1457.9	2047.9	0.8	0.00817	0.00842351		0.92112	1.2		gb:AF309381.1 DB_XREF=gi:11177838 TID=Os.2613.1 CNT=26 FEA=FLmRNA TIER=FL STK=3 UG=Os.2613 DEF=Oryza sativa (japonica cultivar-group) clone S4892 putative glutathione S-transferase OsGSTZ1 mRNA, complete cds. PROD=putative glutathione S-transfera	LOC_Os12g10720		unspliced-genomic glutathione S-transferase, putative, expressed		AT2G02380	2e-41	266236_at
Os.12899.1.S1_at	1995.4	1444.1	1397.6	1701.3	1834.1	2651.4	2359.5	1832.2	1851.5	1711.1	4.4	0.02465	0.00553974		1965	1569	1601.5	1476.7	1970.9	2104.8	2220.4	1562.7	1298.8	1621.6	4.4	0.00112	0.00563377		0.72288	4.4		gb:D12628.1 DB_XREF=gi:391883 TID=Os.12899.1 CNT=17 FEA=FLmRNA TIER=FL STK=3 UG=Os.12899 DEF=Oryza sativa (japonica cultivar-group) mRNA for Maternal G10 like protein, complete cds. PROD=Maternal G10 like protein FL=gb:D12628.1 gb:AK103299.1 RE	LOC_Os12g05410		unspliced-genomic protein G10 homolog 3, putative, expressed		AT4G21110	3e-75	254399_at
Os.12899.1.S1_s_at	2483.8	1862.6	1912.3	2122	2755.2	2542.2	2870.3	2448.6	2091.3	2024.5	4.4	0.02374	0.00451786		2210.4	1803.7	2127.1	2140.1	2638.5	2576.7	2937.3	2306.6	2073	2304.8	3.2	0.08293	0.00920543		0.887352	3.8		gb:D12628.1 DB_XREF=gi:391883 TID=Os.12899.1 CNT=17 FEA=FLmRNA TIER=FL STK=3 UG=Os.12899 DEF=Oryza sativa (japonica cultivar-group) mRNA for Maternal G10 like protein, complete cds. PROD=Maternal G10 like protein FL=gb:D12628.1 gb:AK103299.1 RE	LOC_Os12g05410		unspliced-genomic protein G10 homolog 3, putative, expressed		AT4G21110	3e-75	254399_at
Os.483.1.S1_at	1136.4	1939.3	2181	1783.2	1550.5	1441.4	698.5	2536.3	2150.4	1351.4	15.6	0.08467	0.0385082		655	1967.1	2285.4	1668.1	1155.1	1515.3	654.4	2341.9	2343	1205.2	15.6	0.05687	0.0263981		0.950163	15.6		gb:AB015971.1 DB_XREF=gi:18146757 GEN=OsRan1 TID=Os.483.1 CNT=20 FEA=FLmRNA TIER=FL STK=3 UG=Os.483 DEF=Oryza sativa (japonica cultivar-group) OsRan1 mRNA for small GTP-binding protein (Ran1), complete cds. PROD=small GTP-binding protein (Ran1)	LOC_Os01g42530		unspliced-genomic GTP-binding nuclear protein Ran-2, putative, expressed		AT5G20010	7e-112	246153_s_at
Os.4650.1.S1_at	2463.9	3583.1	4365.3	5106.9	4037.2	3536.1	2138.8	3552	4234.7	4275.6	19.6	0.00124	0.00617828		1613.3	3088.4	3825.8	5030.3	3671.3	3338.7	2067	3397.8	3961.3	3999.3	19.6	0.00333	0.0228461		0.970876	19.6		gb:D89726.1 DB_XREF=gi:2723472 GEN=DAD-1 TID=Os.4650.1 CNT=14 FEA=FLmRNA TIER=FL STK=3 UG=Os.4650 DEF=Oryza sativa (japonica cultivar-group) DAD-1 mRNA for defender against apoptotic death 1 protein, complete cds. PROD=defender against apoptotic	LOC_Os04g32550		unspliced-genomic defender against cell death 1, putative, expressed		AT1G32210	5e-49	245791_at
Os.26384.1.S1_at	845	1850.3	3106.4	2074	819.6	858.1	646.9	2837.2	3282	2958.7	16.4	0.00085	0.0026794		516	2992.2	4954.6	2895.7	940.9	1269.1	634.3	4313.2	4469.5	2470.7	15.6	0.00211	0.00535349		0.921201	16		gb:AB107218.1 DB_XREF=gi:41529311 TID=Os.26384.1 CNT=24 FEA=FLmRNA TIER=FL STK=3 UG=Os.26384 DEF=Oryza sativa (japonica cultivar-group) mRNA for glucose-6-phosphate isomerase, complete cds. PROD=glucose-6-phosphate isomerase FL=gb:AB107218.1 gb:	LOC_Os09g29070		unspliced-genomic glucose-6-phosphate isomerase, putative, expressed		AT4G24620	0	254141_at
Os.14176.1.S1_at	5022.9	4490.3	3837.3	4553.8	5865.9	5414.3	5182.7	3834.1	3521.3	4965.4	2.8	0.001	0.00302482		6645.7	4043.8	4026.1	5884.5	7269.9	5613.4	5879.7	4076.1	4271.1	5516.8	2	0.0092	0.00850969		0.856228	2.4		gb:AY262026.1 DB_XREF=gi:32699975 TID=Os.14176.1 CNT=21 FEA=FLmRNA TIER=FL STK=3 UG=Os.14176 DEF=Oryza sativa (japonica cultivar-group) peroxisomal membrane protein OsPex14p mRNA, complete cds. PROD=peroxisomal membrane protein OsPex14p FL=gb:AY	LOC_Os05g01090		unspliced-genomic peroxin Pex14, putative, expressed		AT5G62810	3e-40	247422_at
Os.17425.1.S1_at	2164.5	1915.5	1578.7	1696	2159.1	2175.9	2627.2	2563.2	1321.9	1297.9	6.8	0.01888	0.00876385		2184.5	1577.6	1320.3	1151	1734.2	1779.9	2037.3	1525.6	1267.8	1491.6	6	0.00209	0.0175186		0.669853	6.4		gb:AB081340.1 DB_XREF=gi:22830606 GEN=HAZ1 TID=Os.17425.1 CNT=17 FEA=FLmRNA TIER=FL STK=3 UG=Os.17425 DEF=Oryza sativa (japonica cultivar-group) HAZ1 mRNA for PHD-finger family homeodomain protein, complete cds. PROD=PHD-finger family homeodomai	LOC_Os06g12400	HB	unspliced-genomic homeobox protein HOX1A, putative, expressed		AT3G19510	1e-92	258011_at
Os.10851.1.S1_at	2829.9	2246.8	1857.6	2528.4	2973.9	3463.1	3665.4	2355.3	2017.4	1889.3	4.4	0.00187	0.00159584		2417.4	2192.4	1899.6	2027.1	2939.4	3222.6	3251.9	1889.2	1868	1870.3	4	0.00224	0.00368189		0.94647	4.2		gb:AF464908.1 DB_XREF=gi:18481631 GEN=TFIIB TID=Os.10851.1 CNT=17 FEA=FLmRNA TIER=FL STK=3 UG=Os.10851 DEF=Oryza sativa general transcription factor TFIIB (TFIIB) mRNA, complete cds. PROD=general transcription factor TFIIB FL=gb:AK058238.1 gb:A	LOC_Os09g36440		unspliced-genomic transcription initiation factor IIB, putative, expressed		AT3G10330	2e-155	259155_at
Os.4385.1.S1_at	7340.3	8279.7	2264.4	1282.6	2330.6	8653.6	10421.7	7607.3	3175.2	1688.6	8	0.00023	0.00457034		7206.9	15646	2397	1054.9	1977.3	4759.5	9264.2	5867.9	2167	990	9.6	0.02969	0.0351615		0.781444	8.8		gb:AB028184.1 DB_XREF=gi:6730939 GEN=OsNAC5 TID=Os.4385.1 CNT=21 FEA=FLmRNA TIER=FL STK=3 UG=Os.4385 DEF=Oryza sativa mRNA for OsNAC5 protein, complete cds. PROD=OsNAC5 protein FL=gb:AK102475.1 gb:AK063399.1 gb:AB028184.1 REP_ORG=O. sativa	LOC_Os11g08210	NAC	unspliced-genomic NAC domain-containing protein 71, putative, expressed		AT1G77450	3e-75	259705_at
Os.1193.1.S1_at	25143.3	19127.1	4633.4	1973.9	8255.2	14461.1	24040	19534.2	6792.1	4849.4	8	4e-05	0.00172752		25749.3	16366.5	5155.5	3396.3	8830.4	12033.6	24438.3	18311	6256	4863.7	8	0.00024	0.00253153		0.987488	8		gb:AF001505.1 DB_XREF=gi:2160781 GEN=OsAMT1 TID=Os.1193.1 CNT=16 FEA=FLmRNA TIER=FL STK=3 UG=Os.1193 DEF=Oryza sativa putative ammonium transporter OsAMT1p (OsAMT1) mRNA, complete cds. PROD=putative ammonium transporter OsAMT1p FL=gb:AK105667.1	LOC_Os04g43070		unspliced-genomic ammonium transporter 1, member 2, putative, expressed		AT4G13510	0	254723_at
Os.7753.1.S1_at	24.7	64.4	56.3	2.3	3	11.9	24.7	68.4	64.8	32.9	13.6	0.00178	0.00344946		5.7	82.8	101.5	6.5	5.1	7.3	27.7	36.6	29.3	0.9	13.6	0.08083	0.0224959		0.689743	13.6		gb:AF032974.1 DB_XREF=gi:2655290 GEN=GER4 TID=Os.7753.1 CNT=13 FEA=FLmRNA TIER=FL STK=3 UG=Os.7753 DEF=Oryza sativa germin-like protein 4 (GER4) mRNA, complete cds. PROD=germin-like protein 4 FL=gb:AF032974.1 gb:AK061164.1 REP_ORG=O. sativa	LOC_Os01g18170		unspliced-genomic rhicadhesin receptor precursor, putative, expressed		AT1G09560	4e-67	264506_at
Os.4601.1.S1_a_at	2377.4	2250.8	3718.5	4858.7	5418.8	3845.9	2680.9	1797.3	2637.5	4308.6	23.2	9e-05	0.00080603		2368.8	1792.7	2705.9	4398.3	5359.6	3819	2979.4	1810.2	2439.6	3852.5	0	3e-05	0.00103633		0.953019	23.6		gb:AB109892.1 DB_XREF=gi:30578177 GEN=PHYB TID=Os.4601.1 CNT=15 FEA=FLmRNA TIER=FL STK=3 UG=Os.4601 DEF=Oryza sativa (japonica cultivar-group) PHYB mRNA for phytochrome B, complete cds. PROD=phytochrome B FL=gb:AB109892.1 gb:AK063814.1 REP_ORG	LOC_Os03g19590		unspliced-genomic phytochrome B, putative, expressed		AT2G18790	0	266065_at
Os.9547.1.S1_at	4128.1	2088.7	972.2	534.7	1151	1384.3	5554.8	1562.3	971.8	794	7.6	0.0226	0.0303003		6143.5	2180.7	976.1	615.2	1382.2	1371.9	6749.3	1755	1110.7	704.2	7.6	0.02899	0.0294774		0.986796	7.6		gb:AB096863.1 DB_XREF=gi:25553519 GEN=OsUGE-2 TID=Os.9547.1 CNT=14 FEA=FLmRNA TIER=FL STK=3 UG=Os.9547 DEF=Oryza sativa (japonica cultivar-group) OsUGE-2 mRNA for putative UDP-glucose 4-epimerase, complete cds. PROD=putative UDP-glucose 4-epimer	LOC_Os08g28730		unspliced-genomic UDP-glucose 4-epimerase GEPI48, putative, expressed		AT4G10960	7e-155	254952_at
Os.8830.1.S1_at	1864.4	2297.7	1875.4	1716.5	1539.2	1926.8	1863.3	2106.8	1961.1	1736.4	11.6	0.01407	0.0200457		2096	2524.4	1778.6	1584.4	1567.7	1788.7	1931.2	2052.4	1933.6	1452	10.8	0.00553	0.0112881		0.879917	11.2		gb:AB055156.1 DB_XREF=gi:18147581 GEN=SEC13 TID=Os.8830.1 CNT=13 FEA=FLmRNA TIER=FL STK=3 UG=Os.8830 DEF=Oryza sativa mRNA for Sec13p, complete cds. PROD=Sec13p FL=gb:AK111559.1 gb:AK112028.1 gb:AK111732.1 gb:AB055156.1 REP_ORG=O. sativa	LOC_Os02g04320		unspliced-genomic SEC13-related protein, putative, expressed		AT2G30050	6e-148	267277_at
Os.187.1.S1_at	3897.2	2870.8	3315.2	3700.1	4196.1	4700.4	4304	2883.1	3189.9	4433.8	2	0.00509	0.0055427		3666.4	2262.7	3034.7	4457.6	5050.8	5219.2	4891.3	2308	3171.5	4391.7	1.6	0.00145	0.00358866		0.93716	1.8		gb:D86925.1 DB_XREF=gi:1695697 TID=Os.187.1 CNT=10 FEA=FLmRNA TIER=FL STK=3 UG=Os.187 DEF=Oryza sativa (japonica cultivar-group) mRNA for C-type cyclin, complete cds. PROD=C-type cyclin FL=gb:D86925.1 gb:AK072415.1 REP_ORG=O. sativa	LOC_Os09g32680		unspliced-genomic cyclin-C, putative, expressed		AT5G48630	2e-68	248666_at
Os.187.1.S1_s_at	2537.7	1885.3	2687.2	2659	2926.2	3078.9	3072.8	1911.5	2144.6	3024.6	1.2	0.03175	0.0286709		2560	1717.4	2248.7	3453.8	3727.9	3577.1	3419.4	1695.7	2134.5	3118.1	1.2	0.00104	0.00326223		0.894512	1.2		gb:D86925.1 DB_XREF=gi:1695697 TID=Os.187.1 CNT=10 FEA=FLmRNA TIER=FL STK=3 UG=Os.187 DEF=Oryza sativa (japonica cultivar-group) mRNA for C-type cyclin, complete cds. PROD=C-type cyclin FL=gb:D86925.1 gb:AK072415.1 REP_ORG=O. sativa	LOC_Os09g32680		unspliced-genomic cyclin-C, putative, expressed		AT5G48630	2e-68	248666_at
Os.15238.1.S1_at	2483.5	2157.3	1634.9	1838.3	2350.8	2622	2140.6	2161	1501.2	1667.2	4.8	0.00179	0.00596595		2756	1850.2	1725.2	2023.4	2130.1	2475.2	2627.6	2229.2	2041.8	1874.5	5.6	0.00673	0.00722059		0.700492	5.2		gb:AB051294.1 DB_XREF=gi:17025917 GEN=OsNIF1 TID=Os.15238.1 CNT=12 FEA=FLmRNA TIER=FL STK=3 UG=Os.15238 DEF=Oryza sativa OsNIF1 mRNA for bZIP transcription factor, complete cds. PROD=bZIP transcription factor FL=gb:AB051294.1 REP_ORG=O. sativa	LOC_Os03g20310	bZIP	unspliced-genomic transcription factor HBP-1b, putative, expressed		AT5G06950	3e-109	250671_at
Os.26508.2.S1_a_at	6268.3	4702.5	4111.5	3546.2	3751.6	3521.6	4015.4	5676.7	3798.2	3372.5	10	0.06129	0.0208849		5522.7	4754.8	4505.3	3813.8	3780.9	3582.8	4117.1	5508.4	3885.1	3998.7	11.2	0.05961	0.0459049		0.958928	10.6		gb:AK068361.1 DB_XREF=gi:32978379 TID=Os.26508.2 CNT=7 FEA=FLmRNA TIER=FL STK=3 UG=Os.26508 UG_TITLE=(japonica cultivar-group) mRNA for hypothetical protein, complete cds, clone: 23C4AG047 DEF=Oryza sativa (japonica cultivar-group) cDNA clone:J01	LOC_Os07g35870	bHLH	unspliced-genomic bHLH transcription factor, putative, expressed		AT5G54680	3e-60	248171_at
Os.3396.1.S1_at	959.7	764.2	775.4	619.6	332.4	364.4	620.9	772.4	793.6	386.3	12.4	0.01487	0.00880914		674.9	522.8	468	372.7	300.6	277.4	539.3	714.6	392.4	348.1	11.2	0.01299	0.014106		0.787467	11.8		gb:AB001884.1 DB_XREF=gi:3618311 TID=Os.3396.1 CNT=8 FEA=FLmRNA TIER=FL STK=3 UG=Os.3396 DEF=Oryza sativa (japonica cultivar-group) mRNA for zinc finger protein, complete cds, clone:R1479. PROD=zinc finger protein FL=gb:AK105957.1 gb:AB001884.1	LOC_Os06g49880	Orphans	unspliced-genomic salt tolerance-like protein, putative, expressed		AT1G75540	1e-33	262975_at
Os.2714.1.S1_s_at	1309.8	921.6	929.7	1471.5	1435.5	1684.2	945.4	1046.6	1159.6	1067.1	1.6	0.03632	0.0283978		1174.5	822.9	1160.9	1736.2	1780.8	2279.6	1257.4	808.8	1764.3	1390.8	0.4	0.03884	0.0294719		0.824099	1		gb:AF194414.2 DB_XREF=gi:12592068 GEN=CDPK5 TID=Os.2714.1 CNT=7 FEA=FLmRNA TIER=FL STK=3 UG=Os.2714 DEF=Oryza sativa calcium-dependent protein kinase (CDPK5) mRNA, complete cds. PROD=calcium-dependent protein kinase FL=gb:AF194414.2 gb:AK121471	LOC_Os07g22710		unspliced-genomic CDPK-related protein kinase, putative, expressed		AT2G17890	0	264813_at
Os.2316.1.S1_a_at	604.9	487.3	287.5	260.9	371.5	348	427.1	312.1	279.1	307.3	7.2	0.05516	0.0182997		716.1	567.6	338.1	369.3	419.7	548.1	678	371.6	338.3	400.6	6.4	0.00616	0.0136319		0.88596	6.8		gb:AF159133.1 DB_XREF=gi:5353745 TID=Os.2316.1 CNT=5 FEA=FLmRNA TIER=FL STK=3 UG=Os.2316 DEF=Oryza sativa subsp. indica SIR2-like protein mRNA, complete cds. PROD=SIR2-like protein FL=gb:AF159133.1 gb:AK069000.1 REP_ORG=O. sativa	LOC_Os04g20270		unspliced-genomic mono-ADP-ribosyltransferase sirtuin-6, putative, expressed		AT5G55760	3e-156	248030_at
Os.1606.2.S1_a_at	5134.4	6446.3	7758.1	5723.7	3250.6	2603.5	2820.3	6348.6	7736.5	7258.1	16	0.00056	0.000964898		4741.5	6030	9965.5	7558.3	3441.5	2419.5	3519.5	6532.3	8766.8	8781.1	16.4	0.00017	0.0018309		0.948576	16.2		gb:AB050885.1 DB_XREF=gi:13442817 GEN=OsTATC TID=Os.1606.2 CNT=4 FEA=FLmRNA TIER=FL STK=3 UG=Os.1606 UG_TITLE=(japonica cultivar-group) OsTATC (B1080D07.14), mRNA DEF=Oryza sativa (japonica cultivar-group) OsTATC mRNA, complete cds. FL=gb:AB050	LOC_Os04g56430		unspliced-genomic CRK5, putative, expressed		AT4G23140	3e-20	254265_s_at
Os.8239.1.S1_at	20008.3	16333.3	14350.3	17321	17572.7	19044.5	20811.3	18063	16192.4	16365.9	5.6	0.00695	0.00772997		20829	15299.8	13879	14895.8	16908.1	18493.4	19381.6	15534.8	13070	14854.5	5.2	0.0005	0.0049922		0.893157	5.4		gb:AF012897.1 DB_XREF=gi:2293567 TID=Os.8239.1 CNT=380 FEA=FLmRNA TIER=FL STK=3 UG=Os.8239 DEF=Oryza sativa HvB12D homolog mRNA, complete cds. PROD=HvB12D homolog FL=gb:AK121585.1 gb:AK099446.1 gb:AK119679.1 gb:AF012897.1 gb:AF466286.1 REP_ORG=	LOC_Os06g13680		unspliced-genomic B12D protein, expressed		AT3G48140	1e-32	252348_at
Os.12595.1.S1_at	1057.6	1578	2123.1	2188.3	1587.9	1611	903.6	1795.4	1827.5	1847.4	18.4	0.0091	0.019227		1057.7	1699.7	2153.9	2323.9	1743.8	1752.7	861.8	1692.9	2170.3	2646.8	19.2	0.00128	0.00327177		0.895029	18.8		gb:AY017415.1 DB_XREF=gi:12621069 TID=Os.12595.1 CNT=83 FEA=FLmRNA TIER=FL STK=3 UG=Os.12595 DEF=Oryza sativa subsp. japonica nuclear cap-binding protein CBP80 mRNA, complete cds. PROD=nuclear cap-binding protein CBP80 FL=gb:AK102852.1 gb:AY0174	LOC_Os03g22570		unspliced-genomic ABH1, putative, expressed		AT2G13540	0	263727_at
Os.2614.1.S1_at	2853.9	1751.5	4377	5532.1	7745.3	6147.9	5042.4	1203.8	3169.1	7518.5	0	0.00105	0.00961881		2314.1	1022.7	2626.8	7316.6	8049.1	6025.9	5590.4	1134.2	3049.6	7976.4	0	0.00092	0.00355854		0.953205	0		gb:AF309384.1 DB_XREF=gi:11177844 TID=Os.2614.1 CNT=30 FEA=FLmRNA TIER=FL STK=3 UG=Os.2614 DEF=Oryza sativa (japonica cultivar-group) clone R1713_1A putative glutathione S-transferase OsGSTF3 mRNA, complete cds. PROD=putative glutathione S-transf	LOC_Os03g04260		unspliced-genomic glutathione S-transferase, putative, expressed		AT3G03190	5e-51	258851_at
Os.10369.1.S1_a_at	12274.1	10192	7642.5	10907.4	12122.5	11466.4	13635.5	11224.7	8489.3	8729.2	5.2	0.01248	0.00995058		11713.8	8759.1	8097.3	10206.5	10429.2	11600.1	13190.3	9984.2	8079	7866.8	5.2	0.00513	0.00485264		0.935797	5.2		gb:AF364177.1 DB_XREF=gi:29468119 TID=Os.10369.1 CNT=28 FEA=FLmRNA TIER=FL STK=3 UG=Os.10369 DEF=Oryza sativa leucine-rich repeat protein mRNA, complete cds. PROD=leucine-rich repeat protein FL=gb:AF364177.1 gb:AF364178.1 gb:AK099315.1 gb:AF4663	LOC_Os01g59440		unspliced-genomic BRASSINOSTEROID INSENSITIVE 1-associated receptor kinase 1 precursor, putative, expressed		AT5G21090	2e-92	246029_at
Os.183.1.S1_at	2045.6	2004.2	6649.3	9449.6	7911.9	6284.7	5326.1	3129.3	7012.9	9371.9	21.6	0.00108	0.00258412		986.1	1598.3	5997.3	6663.1	7692.6	6805.4	3074.2	2685.3	6015.2	7977.4	22	0.00123	0.00206196		0.935218	21.8		gb:L36094.1 DB_XREF=gi:535743 TID=Os.183.1 CNT=17 FEA=FLmRNA TIER=FL STK=3 UG=Os.183 UG_TITLE=(japonica cultivar-group) mRNA for elongation factor 1 beta 2, complete cds DEF=Oryza sativa unknown ORF mRNA, complete cds. FL=gb:AK059914.1 gb:L36094	LOC_Os03g29260		unspliced-genomic elongation factor 1-delta 2, putative, expressed		AT1G30230	3e-62	265816_s_at
Os.3707.1.S1_at	4694.3	4163.9	3803.6	3578.1	3170.6	3068	3225.9	4797.9	3921.5	4089.3	13.2	0.12984	0.0203774		4047.9	4009.3	3856.4	4305.4	2919.4	2695.6	3034	4749	4057.5	3866.7	14.8	0.03857	0.0263535		0.837917	14		gb:AB026563.1 DB_XREF=gi:8671501 GEN=OsPBA1 TID=Os.3707.1 CNT=22 FEA=FLmRNA TIER=FL STK=3 UG=Os.3707 DEF=Oryza sativa (japonica cultivar-group) OsPBA1 mRNA for beta 1 subunit of 20S proteasome, complete cds. PROD=beta 1 subunit of 20S proteasome	LOC_Os02g53060		unspliced-genomic proteasome subunit beta type 6 precursor, putative, expressed		AT4G31300	6e-99	253521_at
Os.4468.1.S1_at	337.7	425.1	2347.4	2948.9	2162	1144.1	612.6	600.1	2326.8	3115.7	20.4	3e-05	0.00179834		223.4	496.4	2592.5	2876.9	2169.8	1160.8	506.5	667.3	2293.6	2923.7	20.4	1e-05	0.00150012		0.993597	20.4		gb:AF210324.1 DB_XREF=gi:7381461 GEN=UMPS1 TID=Os.4468.1 CNT=17 FEA=FLmRNA TIER=FL STK=3 UG=Os.4468 DEF=Oryza sativa clone C26554 UMP synthase (UMPS1) mRNA, complete cds. PROD=UMP synthase FL=gb:AB031395.1 gb:AF210323.1 gb:AK069565.1 gb:AF21032	LOC_Os01g72240		unspliced-genomic uridine 5-monophosphate synthase, putative, expressed		AT3G54470	4e-167
Os.2298.1.S1_at	800.3	745.9	1962	2060.9	1772.9	1816.8	1242	1054.4	2449.1	2298.7	20.8	0.01319	0.0191385		477.7	590.8	1943.4	2207.5	1848.6	1925.1	958.7	1080.4	2049.9	2351.5	21.2	0.00281	0.00455946		0.961675	21		gb:AF066050.1 DB_XREF=gi:3411151 GEN=TK TID=Os.2298.1 CNT=14 FEA=FLmRNA TIER=FL STK=3 UG=Os.2298 DEF=Oryza sativa thymidine kinase (TK) mRNA, complete cds. PROD=thymidine kinase FL=gb:AK066124.1 gb:AF066050.1 gb:AK068779.1 REP_ORG=O. sativa	LOC_Os03g02200		unspliced-genomic thymidine kinase, putative, expressed		AT3G07800	8e-79	259224_at
Os.2224.1.S1_a_at	4791.4	5487.8	1746.6	893	1326.5	1095.4	3508.5	6391.2	1868.2	1561.3	10.8	0.0087	0.012984		6881.9	6218.9	2535.9	1174.8	1241.9	1065.9	3689.8	6542.8	2093.4	1113.9	10.4	0.00572	0.00512292		0.965852	10.6		gb:AF042332.1 DB_XREF=gi:3560530 TID=Os.2224.1 CNT=11 FEA=FLmRNA TIER=FL STK=3 UG=Os.2224 DEF=Oryza sativa subsp. japonica cycloartenol-C24-methyltransferase mRNA, complete cds. PROD=cycloartenol-C24-methyltransferase FL=gb:AF042332.1 gb:AK07289	LOC_Os07g10600		unspliced-genomic cycloartenol-C-24-methyltransferase 1, putative, expressed		AT5G13710	3e-155	250254_at
Os.15247.1.S1_s_at	118	99.2	174	6146.7	3356.7	1452.1	152.3	49.1	231.9	5499.3	22.4	0.00759	0.0175051		87.9	52	183.9	7287.1	4135.3	1856.1	151.1	46.3	307.1	8098.7	22.4	0.0088	0.0190362		0.991903	22.4		gb:AB125310.1 DB_XREF=gi:46917345 GEN=SAPK9 TID=Os.15247.1 CNT=9 FEA=FLmRNA TIER=FL STK=3 UG=Os.15247 DEF=Oryza sativa (japonica cultivar-group) SAPK9 mRNA for serinethreonine protein kinase SAPK9, complete cds. PROD=serinethreonine protein kina	LOC_Os12g39630		unspliced-genomic serine/threonine-protein kinase SAPK9, putative, expressed		AT4G33950	5e-163	253264_at
Os.15696.1.S1_a_at	1662.7	1539.8	1569.8	1478.2	2017.7	2678	2173.8	1592.4	1578.4	1270.6	4	0.02312	0.00797627		2039.5	2016.7	1945.5	1367.5	2102.2	2832.8	2458.8	2272.7	1794	1524.1	6.4	0.0231	0.0138631		0.866528	5.2		gb:AB081464.1 DB_XREF=gi:26006019 GEN=Rep2 TID=Os.15696.1 CNT=7 FEA=FLmRNA TIER=FL STK=3 UG=Os.15696 DEF=Oryza sativa (japonica cultivar-group) mRNA for asparaginyl endopeptidase REP-2, complete cds. PROD=asparaginyl endopeptidase REP-2 FL=gb:A	LOC_Os02g43010		unspliced-genomic vacuolar processing enzyme, beta-isozyme precursor, putative, expressed		AT1G62710	0	262644_at
Os.10555.1.S1_a_at	1277.5	2159.8	2090.8	1776.4	904.4	810.5	699.8	1677.2	2145.7	1440.8	15.6	0.0013	0.00239713		1142.7	1581.4	1532.3	1302.9	735.9	485.4	626.6	1867.3	2350.2	1309.6	15.2	0.00245	0.00494931		0.880139	15.4		gb:AY219846.1 DB_XREF=gi:28849862 TID=Os.10555.1 CNT=7 FEA=FLmRNA TIER=FL STK=3 UG=Os.10555 DEF=Oryza sativa (japonica cultivar-group) zinc finger transcription factor ZFP30 mRNA, complete cds. PROD=zinc finger transcription factor ZFP30 FL=gb:A	LOC_Os02g10920		unspliced-genomic RNA-binding protein cabeza, putative, expressed		AT3G15680	2e-45	258222_at
Os.19632.1.S1_at	64.4	34.6	75.3	854.4	474.3	586.2	179.7	28.5	71.5	452.8	23.6	0.00955	0.0100423		2.8	17	2.6	326.8	308.6	279.7	97.7	28.5	45.6	213.8	0	0.00104	0.00250815		0.953722	23.8		gb:AB070226.1 DB_XREF=gi:18700308 GEN=OsIRT1 TID=Os.19632.1 CNT=5 FEA=FLmRNA TIER=FL STK=3 UG=Os.19632 DEF=Oryza sativa OsIRT1 mRNA for iron regulated metal transporter, complete cds. PROD=iron regulated metal transporter FL=gb:AB070226.1 gb:AK	LOC_Os03g46470		unspliced-genomic zinc transporter 10 precursor, putative, expressed		AT1G31260	7e-83	262546_at
Os.12835.1.S1_at	157.2	190	248.4	368.7	191.4	92.6	19	197.4	291.2	395.1	18.8	0.00211	0.0143728		54.1	208.3	218	232.5	108.5	90.8	15.1	225.8	285.3	262.7	17.2	0.00126	0.00477449		0.841581	18		gb:D23674.1 DB_XREF=gi:432367 TID=Os.12835.1 CNT=6 FEA=FLmRNA TIER=FL STK=3 UG=Os.12835 DEF=Oryza sativa (japonica cultivar-group) mRNA for elongation factor 1 beta, complete cds. PROD=elongation factor 1 beta FL=gb:AK107918.1 gb:D23674.1 gb:D50	LOC_Os09g35700		unspliced-genomic YY1 protein precursor, putative, expressed		AT5G52160	4e-07	248350_at
Os.10411.1.S1_at	35.8	65.9	46.5	71.3	104.4	282.6	164.1	85.4	104.4	53.5	3.6	0.16441	0.0339608		41.4	67.7	67.7	136.7	167.3	128.1	173	74.3	83.1	115.3	1.2	0.10227	0.0462282		0.505811	2.4		gb:AY077725.1 DB_XREF=gi:18652813 GEN=ZFP TID=Os.10411.1 CNT=5 FEA=FLmRNA TIER=FL STK=3 UG=Os.10411 DEF=Oryza sativa C2H2 zinc finger protein (ZFP) mRNA, complete cds. PROD=C2H2 zinc finger protein FL=gb:AK108227.1 gb:AY077725.1 REP_ORG=O. sat	LOC_Os01g62190	C2H2	unspliced-genomic PEThy, putative, expressed		AT2G28710	3e-19	263411_at
Os.6649.1.S1_at	856.6	169.4	308.9	1551.5	1086.8	959.3	545.9	222.9	382.1	980.6	0.4	0.01035	0.0127013		225	71.2	170.8	676.2	878.7	364.7	331.5	228.1	121.7	667	23.6	0.00306	0.00809548		0.815053	0		gb:AY302058.1 DB_XREF=gi:31872113 GEN=ZIP1 TID=Os.6649.1 CNT=6 FEA=FLmRNA TIER=FL STK=3 UG=Os.6649 DEF=Oryza sativa (japonica cultivar-group) zinc transporter (ZIP1) mRNA, complete cds. PROD=zinc transporter FL=gb:AY302058.1 REP_ORG=O. sativa	LOC_Os01g74110		unspliced-genomic zinc transporter 2 precursor, putative, expressed		AT5G59520	7e-100	247678_at
Os.3740.1.S1_x_at	536.3	487.9	529.7	902.6	1128.6	808.8	603.9	521.2	484.3	871	0	0.00021	0.00235805		514.3	436.7	527	671.2	772.5	863.4	502.7	499.9	486.9	864.2	0.4	0.00323	0.014053		0.832946	0.2		gb:AB036988.1 DB_XREF=gi:9229938 GEN=Odb1 TID=Os.3740.1 CNT=5 FEA=FLmRNA TIER=FL STK=3 UG=Os.3740 DEF=Oryza sativa (japonica cultivar-group) mRNA for dsRNA-binding protein ODB1, complete cds. PROD=dsRNA-binding protein ODB1 FL=gb:AK103543.1 gb:	LOC_Os12g01916		unspliced-genomic bcpLH protein, putative, expressed		AT1G09700	9e-55	264677_at
Os.28012.1.S1_at	233.1	414.6	574.9	621.9	513.6	382.7	154.9	492.1	557.1	659.6	19.2	0.00049	0.00473127		111.4	374.9	645.1	594.4	338.6	350	191.8	503.5	640.6	615.4	18	0.001	0.0147847		0.909415	18.6		gb:AB109201.1 DB_XREF=gi:30314656 GEN=OsRFC5 TID=Os.28012.1 CNT=4 FEA=FLmRNA TIER=FL STK=3 UG=Os.28012 DEF=Oryza sativa (japonica cultivar-group) OsRFC5 mRNA for replication factor C 38 kDa subunit, complete cds. PROD=replication factor C 38 kDa	LOC_Os03g57870		unspliced-genomic replication factor C subunit 5, putative, expressed		AT5G27740	7e-159	246738_at
Os.12625.6.S1_x_at	19304.4	21405.7	28455.2	31849	27847.2	24366	22084.4	20819.4	26907.3	28300.6	20.8	0.00036	0.00209429		14839.2	18353.6	28623.9	31364.6	27270.9	24693.2	22943.5	20750	26912.7	27599.3	20.8	0.00694	0.00703552		0.957426	20.8		gb:AK062030.1 DB_XREF=gi:32972048 TID=Os.12625.6 CNT=1 FEA=FLmRNA TIER=FL STK=1 UG=Os.12625 UG_TITLE=(japonica cultivar-group) putative plastidic ATPADP-transporter (P0707D10.36), mRNA DEF=Oryza sativa (japonica cultivar-group) cDNA clone:001-043	LOC_Os03g08010		unspliced-genomic elongation factor 1-alpha, putative, expressed		AT5G60390	0	247644_s_at
Os.2226.1.S1_at	7094.6	10258.7	4895.1	3418.4	2998.2	3348.7	3987.5	7424.8	7837.9	3266.2	12.4	0.01493	0.0104836		5503	6945.3	4575.8	2997	2346.1	3145.2	3998.5	7054.2	8739.6	2313.5	12.8	0.01379	0.0136129		0.895508	12.6		gb:AF042840.1 DB_XREF=gi:3617841 GEN=CaM1 TID=Os.2226.1 CNT=86 FEA=FLmRNA TIER=FL STK=2 UG=Os.2226 DEF=Oryza sativa clone F14605 calmodulin (CaM1) mRNA, complete cds. PROD=calmodulin FL=gb:AF042840.1 gb:AK070090.1 gb:AK059756.1 REP_ORG=O. sati	LOC_Os03g20370		unspliced-genomic calmodulin, putative, expressed		AT3G43810	2e-81	252713_at
Os.5502.1.S1_at	30648.2	21143.8	16683.8	22997.1	25844.5	25323.6	30183.5	22490.7	18259.4	18165.2	5.2	0.00461	0.00914692		33320.3	16349.6	13397.2	20356.7	22691.4	23656.5	29252.2	17771.3	13690.3	18110.9	4.8	0.01223	0.0199744		0.953379	5		gb:AB079798.1 DB_XREF=gi:18844989 GEN=OsRad6 TID=Os.5502.1 CNT=62 FEA=FLmRNA TIER=FL STK=2 UG=Os.5502 DEF=Oryza sativa (japonica cultivar-group) OsRad6 mRNA for Rad6, complete cds. PROD=Rad6 FL=gb:AK067703.1 gb:AB079798.1 gb:AK120251.1 REP_ORG	LOC_Os03g57790		unspliced-genomic ubiquitin-conjugating enzyme E2-17 kDa, putative, expressed		AT2G02760	8e-85	267484_at
Os.10118.1.S1_at	7539.8	14764.4	13404	10239.2	10953.4	7493.7	7738.8	15723.4	13764.2	13780	15.6	0.02032	0.0211809		7437.3	19388.3	15834.3	12967.1	12889.4	8873.3	8244.9	20163.7	16567.9	13806.6	15.2	0.03615	0.0281182		0.962285	15.4		gb:AB062606.1 DB_XREF=gi:15823774 GEN=UGP TID=Os.10118.1 CNT=84 FEA=FLmRNA TIER=FL STK=2 UG=Os.10118 DEF=Oryza sativa (japonica cultivar-group) UGP mRNA for UDP-glucose pyrophosphorylase, complete cds. PROD=UDP-glucose pyrophosphorylase FL=gb:A	LOC_Os09g38030		unspliced-genomic UTP--glucose-1-phosphate uridylyltransferase, putative, expressed		AT5G17310	0	250074_at
Os.22592.1.S1_a_at	10003.6	10546.4	8223.1	15984.9	14397.3	13806.1	11523.5	10941.4	9689.3	14890.2	0	0.02027	0.0224317		9780.2	9844.2	7531.9	16920.1	14828.3	15024.6	13250.3	11876.4	10580.7	15628.5	0.4	0.03975	0.0215382		0.972755	0.2		gb:AY525328.1 DB_XREF=gi:42541262 TID=Os.22592.1 CNT=36 FEA=FLmRNA TIER=FL STK=2 UG=Os.22592 DEF=Oryza sativa (japonica cultivar-group) putative histone H3 mRNA, complete cds. PROD=putative histone H3 FL=gb:AK120807.1 gb:AY525328.1 REP_ORG=O. s	LOC_Os04g37780		unspliced-genomic histone H3, putative, expressed		AT5G10980	6e-21	250397_at
Os.12729.1.S1_at	1297	1661.2	3118.7	3451.3	3132.2	3128.6	2101.4	1767.1	2577.7	3152.8	22	0.00317	0.00257268		912.7	1804.3	2899.4	3766.5	3257.1	3438.1	1976.2	1612.7	2821	2915.1	22	0.00964	0.00417289		0.968978	22		gb:AF444195.1 DB_XREF=gi:19880700 GEN=MDH TID=Os.12729.1 CNT=50 FEA=FLmRNA TIER=FL STK=2 UG=Os.12729 DEF=Oryza sativa malate dehydrogenase (MDH) mRNA, complete cds; nuclear gene for mitochondrial product. PROD=malate dehydrogenase FL=gb:AK10477	LOC_Os01g46070		unspliced-genomic malate dehydrogenase, mitochondrial precursor, putative, expressed		AT3G15020	1e-142	257213_at
Os.10937.1.S1_at	15638.1	7162.9	824.8	1018.9	1118	1863	11551.3	8552.3	1033.3	1818.6	8.8	0.0113	0.0109311		26066.6	14472.6	1783.1	957.2	1345.4	2637.5	16121.1	13287.8	1371.3	808.4	8.8	0.00769	0.00562372		0.98574	8.8		gb:AB012107.1 DB_XREF=gi:3077789 GEN=RINO1 TID=Os.10937.1 CNT=44 FEA=FLmRNA TIER=FL STK=2 UG=Os.10937 DEF=Oryza sativa RINO1 mRNA for myo-inositol phosphate synthase, complete cds. PROD=myo-inositol phosphate synthase FL=gb:AB012107.1 gb:AK0587	LOC_Os03g09250		unspliced-genomic inositol-3-phosphate synthase, putative, expressed		AT2G22240	0	263433_at
Os.11018.1.S1_at	1712.1	868.6	510	409.4	363.1	384.4	679.5	1509.5	815.9	665.6	10.8	0.09727	0.0349902		930	1100.8	685.5	401.1	442.4	312.5	975.2	2541.8	1639.2	469.5	12.4	0.053	0.0178202		0.677147	11.6		gb:AB052843.1 DB_XREF=gi:11990467 TID=Os.11018.1 CNT=29 FEA=FLmRNA TIER=FL STK=2 UG=Os.11018 DEF=Oryza sativa (japonica cultivar-group) mRNA for ribonuclease, complete cds, clone:C30227. PROD=ribonuclease FL=gb:AB052843.1 gb:AB052842.1 gb:AK0585	LOC_Os08g33710		unspliced-genomic ribonuclease 3 precursor, putative, expressed		AT1G26820	5e-77	263689_at
Os.8496.1.S1_at	5115.3	6509.3	6073.2	4253.5	2446.2	3486.1	4889.2	6231.7	5740.9	4292.3	13.2	0	0.00080603		4775.8	6768.2	5129.8	4547.5	2564.7	4014.9	5076.1	5173.1	5118.1	3076.5	12	0.00484	0.00729933		0.871753	12.6		gb:AB016065.1 DB_XREF=gi:3318614 TID=Os.8496.1 CNT=34 FEA=FLmRNA TIER=FL STK=2 UG=Os.8496 DEF=Oryza sativa (japonica cultivar-group) mRNA for mitochondrial phosphate transporter, complete cds. PROD=mitochondrial phosphate transporter FL=gb:AB016	LOC_Os02g52860		unspliced-genomic phosphate carrier protein, mitochondrial precursor, putative, expressed		AT5G14040	3e-151	250206_at
Os.12424.1.S1_at	4849.5	2819.8	3577.3	4960	5809.5	5109.5	4883.3	3141.1	3608.4	4449.3	1.6	0.00093	0.00360552		3726.5	2683.7	3132.6	5043.9	4868.5	4904.3	4979.4	2953.9	3723	4580.3	1.2	0.0095	0.00863749		0.890133	1.4		gb:AB037153.1 DB_XREF=gi:17297984 GEN=OsRPN12 TID=Os.12424.1 CNT=31 FEA=FLmRNA TIER=FL STK=2 UG=Os.12424 DEF=Oryza sativa (japonica cultivar-group) OsRPN12 mRNA for 26S proteasome regulatory particle non-ATPase subunit12, complete cds. PROD=26S	LOC_Os07g25420		unspliced-genomic 26S proteasome non-ATPase regulatory subunit 8, putative, expressed		AT1G64520	1e-112	261955_at
Os.135.1.S1_at	2879.1	4186.6	4698	5292	6011	5397.8	3742.5	4969.5	5290.5	6032.9	21.6	0.02064	0.0110164		3270.1	5031.7	5314.4	6096.4	6268.4	5558.2	3473.5	4977.9	5409.1	6076.8	20.8	0.00829	0.0102541		0.936908	21.2		gb:D83378.1 DB_XREF=gi:1902991 TID=Os.135.1 CNT=44 FEA=FLmRNA TIER=FL STK=2 UG=Os.135 DEF=Oryza sativa (japonica cultivar-group) mRNA for asparagine synthetase, complete cds. PROD=asparagine synthetase FL=gb:U55873.1 gb:D83378.1 gb:AK100247.1 R	LOC_Os06g15420		unspliced-genomic asparagine synthetase, putative, expressed		AT5G10240	0	250484_at
Os.3395.1.S1_at	11452.2	10480.6	8260.6	8462.1	9837.2	12820	11712.9	12025.6	7672.7	8174.5	6.4	0.0014	0.00476904		13126.5	11908	8452.9	7267.8	8505.7	9803	12931.8	10266.6	7495.8	8170.2	8	0.0008	0.00757031		0.729972	7.2		gb:AB001882.1 DB_XREF=gi:3618307 TID=Os.3395.1 CNT=27 FEA=FLmRNA TIER=FL STK=2 UG=Os.3395 DEF=Oryza sativa (japonica cultivar-group) mRNA for zinc finger protein, complete cds, clone:C60910. PROD=zinc finger protein FL=gb:AK099864.1 gb:AK101822.	LOC_Os03g22770	C2C2-CO-like	unspliced-genomic CCT motif family protein, expressed		AT2G47890	3e-26	266514_at
Os.316.1.S1_at	7714.9	4785	6498.4	14323.2	11198.6	11764.2	6625.7	2938.1	5021.7	8239.9	0.4	0.00707	0.00444322		6477.7	1629.7	3809.6	11596	9374.4	10063.5	7029.8	1309	4571.1	9465.9	0.4	0.00185	0.0058577		0.922676	0.4		gb:AK099079.1 DB_XREF=gi:32984288 TID=Os.316.1 CNT=25 FEA=FLmRNA TIER=FL STK=2 UG=Os.316 UG_TITLE=(japonica cultivar-group) monosaccharide transporter 3 (P0617C02.23), mRNA DEF=Oryza sativa (japonica cultivar-group) cDNA clone:J023001I07, full in	LOC_Os07g01560		unspliced-genomic sugar transport protein 1, putative, expressed		AT1G11260	0	262456_at
Os.7911.1.S1_at	3309.6	3104.7	1552.6	2403.3	1730.4	4144.3	3256.2	3653.6	1398.5	1595.2	6.8	0.01694	0.023346		2518.2	4254.2	1137.5	1190.1	1153.4	2772.7	2625.8	5083.6	1441.8	931.2	10	0.03318	0.0329353		0.763663	8.4		gb:AF309382.1 DB_XREF=gi:11177840 TID=Os.7911.1 CNT=25 FEA=FLmRNA TIER=FL STK=2 UG=Os.7911 DEF=Oryza sativa (japonica cultivar-group) clone C63266_1A putative glutathione S-transferase OsGSTF5 mRNA, complete cds. PROD=putative glutathione S-trans	LOC_Os01g27210		unspliced-genomic glutathione S-transferase IV, putative, expressed		AT3G62760	2e-43	251231_at
Os.158.1.S1_at	75.3	5.3	10.9	492.2	721.5	497.6	63.3	8.1	9.7	395.2	0.4	5e-05	0.00157373		9.3	8.4	6.8	281.1	405.8	328.7	86.9	12.6	8.3	451.6	0	0.00075	0.00582098		0.923006	0.2		gb:D14481.1 DB_XREF=gi:531044 TID=Os.158.1 CNT=22 FEA=FLmRNA TIER=FL STK=2 UG=Os.158 DEF=Oryza sativa (japonica cultivar-group) prxRPA mRNA for putative peroxidase, complete cds. PROD=putative peroxidase FL=gb:AK061206.1 gb:D14481.1 gb:AK099448.	LOC_Os10g02070		unspliced-genomic peroxidase N precursor, putative, expressed		AT5G19890	9e-89	246149_at
Os.3921.1.S1_at	1518.7	2089.5	3918.3	3965.8	3603.6	2745.5	1780.7	2068.3	3251.1	3636.8	20.4	0.00016	0.00165268		1096.2	1977.7	3395.7	3560.4	3454.5	2892.7	1599.5	2202.5	3647.7	3959.9	20.4	0.0003	0.00211139		0.946195	20.4		gb:AB040051.1 DB_XREF=gi:10129884 GEN=mEF-G TID=Os.3921.1 CNT=18 FEA=FLmRNA TIER=FL STK=2 UG=Os.3921 DEF=Oryza sativa (japonica cultivar-group) mEF-G mRNA for mitochondrial elongation factor G, complete cds. PROD=mitochondrial elongation factor	LOC_Os03g36780		unspliced-genomic elongation factor G, mitochondrial precursor, putative, expressed		AT1G45332	0	266127_s_at
Os.2616.1.S1_at	2848.3	2447.5	2279.3	2628.6	3273.2	3778	3601.8	2706	2205.6	2877.4	3.6	0.00141	0.00165268		3141.7	2748.1	2528.9	3395.5	3473.8	3747.8	3364.4	2624.9	2511.3	2853.8	2.8	0.00062	0.00173127		0.849	3.2		gb:AF280060.1 DB_XREF=gi:11494368 GEN=TON1 TID=Os.2616.1 CNT=19 FEA=FLmRNA TIER=FL STK=2 UG=Os.2616 DEF=Oryza sativa tonneau 1 (TON1) mRNA, complete cds. PROD=tonneau 1 FL=gb:AK071448.1 gb:AF280060.1 gb:AK103950.1 REP_ORG=O. sativa	LOC_Os11g01170		unspliced-genomic tonneau 1b, putative, expressed		AT3G55000	5e-86	251813_at
Os.12173.1.S1_at	158.1	253	652.3	976	775.9	467.3	225.5	225.2	549.8	1115.8	21.2	4e-05	0.00376383		87.9	251.9	431.3	1264.2	738.5	628.7	236.1	286.1	689.4	1196.4	21.6	0.0011	0.00555975		0.943815	21.4		gb:AF383876.1 DB_XREF=gi:14495343 TID=Os.12173.1 CNT=14 FEA=FLmRNA TIER=FL STK=2 UG=Os.12173 DEF=Oryza sativa plastid division protein FtsZ mRNA, complete cds, nuclear gene for chloroplast protein. PROD=plastid division protein FtsZ FL=gb:AK1058	LOC_Os04g56970		unspliced-genomic cell division protein ftsZ homolog, chloroplast precursor, putative, expressed		AT5G55280	1e-146	248105_at
Os.11036.1.S1_at	2323.4	1664.5	979.7	815.2	1859.1	2229.6	2005.2	1884.3	949.9	1274.4	6	0.00038	0.0053026		2994	2097.8	1050.7	943.1	2104.4	2318.4	2235.4	2031.8	733.4	1042.9	6.4	0.00073	0.0133144		0.959979	6.2		gb:AB071290.1 DB_XREF=gi:19352032 GEN=OsETTIN1 TID=Os.11036.1 CNT=19 FEA=FLmRNA TIER=FL STK=2 UG=Os.11036 DEF=Oryza sativa OsETTIN1 mRNA for Arabidopsis ETTIN-like protein 1, complete cds. PROD=Arabidopsis ETTIN-like protein 1 FL=gb:AB071290.1	LOC_Os05g48870	ARF	unspliced-genomic auxin response factor 4, putative, expressed		AT2G33860	4e-131	267452_at
Os.14934.1.S1_at	545.5	315.5	769.9	1207.4	1231.5	2699.9	667.9	300.8	598.4	1028.5	1.6	0.03888	0.0261327		543.2	254.9	664	1136.5	1175.3	2763.9	754.3	155.8	622	1157.5	1.6	0.03336	0.0240453		0.99374	1.6		gb:AY136816.2 DB_XREF=gi:32527640 GEN=ETR2 TID=Os.14934.1 CNT=13 FEA=FLmRNA TIER=FL STK=2 UG=Os.14934 DEF=Oryza sativa (indica cultivar-group) putative ethylene receptor (ETR2) mRNA, complete cds. PROD=putative ethylene receptor FL=gb:AY136816.	LOC_Os04g08740	Orphans	unspliced-genomic ethylene receptor, putative, expressed		AT3G04580	0	258818_at
Os.47710.2.A1_s_at	2091.6	2698.2	2072.4	1679.1	1766.8	1498.4	1772.4	2374.5	2160.4	1338.3	12.4	0.01658	0.0143111		1784.2	2417.1	2008.8	1641.2	1711.6	1877.9	1756.5	2733.4	1858.3	1268.3	11.6	0.07215	0.036843		0.824208	12		gb:CB667594 DB_XREF=gi:29671319 DB_XREF=OSJNEd14P23.r CLONE=OSJNEd14P23 TID=Os.47710.2 CNT=1 FEA=EST TIER=ConsEnd STK=1 UG=Os.47710 UG_TITLE=Transcribed sequence with weak similarity to protein pir:S60050 (A.thaliana) S60050 vacuolar processing	LOC_Os04g45470		unspliced-genomic vacuolar processing enzyme, beta-isozyme precursor, putative, expressed		AT1G62710	4e-177	262644_at
Os.22665.1.S1_at	60.5	16.5	27.3	98.9	189.7	163.6	63.7	33.3	32.1	60.3	1.6	0.00039	0.00144556		15.8	21	85.9	83.6	224.1	230.9	123.2	19.5	26.9	67	1.6	0.01285	0.0148878		0.899345	1.6		gb:AK110678.1 DB_XREF=gi:32995887 TID=Os.22665.1 CNT=13 FEA=FLmRNA TIER=FL STK=2 UG=Os.22665 UG_TITLE=(japonica cultivar-group) cDNA clone:002-169-H01, full insert sequence DEF=Oryza sativa (japonica cultivar-group) cDNA clone:002-169-H01, full i	LOC_Os03g01890	HB	unspliced-genomic rolled leaf1, putative, expressed		AT5G60690	0	247589_at
Os.22665.1.S2_at	745.7	479.3	424.2	629.4	717.5	717.5	859.8	609.4	490.5	634.3	4	0.01194	0.011551		777.7	543.2	416.3	725.6	782.1	728.4	854.3	600.7	428.7	638.4	3.6	0.011	0.0151824		0.953611	3.8		gb:AY425991.1 DB_XREF=gi:37813099 TID=Os.22665.1 CNT=13 FEA=FLmRNA TIER=FL STK=2 UG=Os.22665 UG_TITLE=(japonica cultivar-group) cDNA clone:002-169-H01, full insert sequence DEF=Oryza sativa (japonica cultivar-group) homeodomain leucine-zipper pro	LOC_Os03g01890	HB	unspliced-genomic rolled leaf1, putative, expressed		AT5G60690	0	247589_at
Os.4469.1.S1_at	112.1	144.2	240.6	236	289	140.9	120.1	107.6	195.9	297.3	21.2	0.00072	0.00395873		61.7	60.4	240.7	274.8	229.6	234.2	63.9	122.7	225.9	333.6	21.2	0.00094	0.00414933		0.826493	21.2		gb:AB021666.2 DB_XREF=gi:4587224 GEN=OsFEN-1a TID=Os.4469.1 CNT=12 FEA=FLmRNA TIER=FL STK=2 UG=Os.4469 DEF=Oryza sativa (japonica cultivar-group) OsFEN-1a mRNA for FEN-1, complete cds. PROD=FEN-1 FL=gb:AK103819.1 gb:AB021666.2 gb:AK060623.1 gb:	LOC_Os05g46260		unspliced-genomic expressed protein		AT5G04500	0	250889_at
Os.26353.1.S1_at	4791.1	4726.4	3267.4	2339.6	3190.3	2747.4	4655.7	4914.2	3953.2	2719.8	10.4	0.00187	0.00381843		3835.2	4544	3428.6	2109.7	3093.9	2413.5	4470.2	5856	3120	2259.4	10.8	0.01238	0.0180121		0.897897	10.6		gb:AB091672.1 DB_XREF=gi:29467451 GEN=OsSUT2 TID=Os.26353.1 CNT=10 FEA=FLmRNA TIER=FL STK=2 UG=Os.26353 DEF=Oryza sativa (japonica cultivar-group) OsSUT2 mRNA for sucrose transporter, complete cds. PROD=sucrose transporter FL=gb:AK067030.1 gb:A	LOC_Os12g05120		unspliced-genomic receptor kinase, putative, expressed		AT2G36570	7e-39	263913_at
Os.7214.1.S1_at	871.5	886.8	1631.3	1298.9	1779.8	1639.1	1350.3	792.8	1129	1406.3	0	0.04854	0.0152987		608.6	752.3	1271.5	1341.5	1686.6	1384.3	1243.5	786.3	1436.4	1447.3	22.8	0.01869	0.00832733		0.852275	23.4		gb:AB088391.1 DB_XREF=gi:37496994 GEN=OsFEN-1b TID=Os.7214.1 CNT=10 FEA=FLmRNA TIER=FL STK=2 UG=Os.7214 DEF=Oryza sativa (japonica cultivar-group) OsFEN-1b mRNA for flap endonuclease-1b, complete cds. PROD=flap endonuclease-1b FL=gb:AK062149.1	LOC_Os03g61820		unspliced-genomic flap endonuclease 1b, putative, expressed		AT5G26680	8e-135	246838_at
Os.27644.1.S1_s_at	1338.9	1056.4	1128.9	1126.4	1290.1	1266.7	1036.3	889.1	871.5	1053.2	2.8	0.06061	0.0021726		1985.4	978.8	1001.5	1063.5	1588.5	1468.5	1170.2	864.1	787.2	1314.4	3.2	0.04637	0.00537026		0.880423	3		gb:AB100696.1 DB_XREF=gi:33235552 GEN=OsTPC1 TID=Os.27644.1 CNT=9 FEA=FLmRNA TIER=FL STK=2 UG=Os.27644 DEF=Oryza sativa (japonica cultivar-group) OsTPC1 mRNA for calcium channel, complete cds. PROD=calcium channel FL=gb:AB071014.1 gb:AK067839.1	LOC_Os01g48680		unspliced-genomic voltage-dependent calcium channel protein TPC1, putative, expressed		AT4G03560	0	255380_at
Os.15738.1.S1_at	600.4	347.4	555.1	1748.8	1883.7	2257.5	739	380.8	515.4	1466.5	0.8	0.00029	0.00196219		295.1	305.3	716	2132.6	1579.8	2281	503.8	288.4	415.8	920.4	0.4	0.01558	0.00559412		0.940745	0.6		gb:AB066561.1 DB_XREF=gi:29466965 GEN=ossap2 TID=Os.15738.1 CNT=11 FEA=FLmRNA TIER=FL STK=2 UG=Os.15738 DEF=Oryza sativa ossap2 gene for secretory acid phosphatase precursor, complete cds. PROD=secretory acid phosphatase precursor FL=gb:AK06627	LOC_Os12g44020		unspliced-genomic purple acid phosphatase precursor, putative, expressed		AT2G16430	2e-167	263553_at
Os.315.1.S1_at	250.9	198	318.1	579	494.7	567.3	247.3	165.6	193.7	699.3	23.6	0.00303	0.016044		188.2	178.8	124.3	520.6	340.8	451.6	258.5	102.6	151.4	678.8	23.6	0.03105	0.0471169		0.945414	23.6		gb:AK071180.1 DB_XREF=gi:32981203 TID=Os.315.1 CNT=9 FEA=FLmRNA TIER=FL STK=2 UG=Os.315 UG_TITLE=(japonica cultivar-group) monosaccharide transporter 2 (OSJNBb0042N11.24), mRNA DEF=Oryza sativa (japonica cultivar-group) cDNA clone:J023082A15, ful	LOC_Os03g39710		unspliced-genomic sugar carrier protein C, putative, expressed		AT1G11260	9e-166	262456_at
Os.3123.1.S1_a_at	3484.5	4008.3	4576.1	4556.5	4174.7	4212.7	3198.2	4210.4	4590.9	4331.1	18.8	0.0132	0.0263926		3117.3	3710.8	4682.3	4168.7	4105.2	4025.1	3109.4	4066.8	4438	4270.1	18.8	0.01606	0.0273522		0.957918	18.8		gb:AF344453.1 DB_XREF=gi:13517760 GEN=SET1 TID=Os.3123.1 CNT=11 FEA=FLmRNA TIER=FL STK=2 UG=Os.3123 DEF=Oryza sativa SET1 (SET1) mRNA, complete cds. PROD=SET1 FL=gb:AF344453.1 gb:AK102379.1 REP_ORG=O. sativa	LOC_Os11g38900	SET	unspliced-genomic histone-lysine N-methyltransferase, H3 lysine-9 specific SUVH1, putative, expressed		AT5G04940	4e-159	250817_at
Os.8416.1.S1_at	932.7	1288.7	811.3	717.3	1315.3	1137.2	1549.3	1746.5	1012.3	893.9	8.4	0.21465	0.0487762		1025.9	1232.1	700.8	504.1	982.3	909.1	1273.9	1475.3	977.4	659.6	9.2	0.02523	0.0140819		0.91556	8.8		gb:AK071787.1 DB_XREF=gi:32981810 TID=Os.8416.1 CNT=9 FEA=FLmRNA TIER=FL STK=2 UG=Os.8416 UG_TITLE=(japonica cultivar-group) isolate 23484 heavy meromyosin-like protein mRNA, complete cds DEF=Oryza sativa (japonica cultivar-group) cDNA clone:J023	LOC_Os03g57530		unspliced-genomic expressed protein
Os.49225.1.S2_at	411.2	239.9	180.5	630.8	2337.8	5240.6	1072.9	437.9	189.2	357.4	2.8	0.02896	0.0188032		1099.7	560.1	331.8	540.5	2814.1	4573.7	2014	632.5	294.5	843.9	3.2	0.0033	0.00444321		0.965029	3		gb:AB013451.1 DB_XREF=gi:7415940 GEN=PibH8 TID=Os.49225.1 CNT=8 FEA=FLmRNA TIER=FL STK=2 UG=Os.49225 UG_TITLE=PibH8 mRNA, complete cds DEF=Oryza sativa PibH8 mRNA, complete cds. FL=gb:AB013451.1 gb:AK065372.1 gb:AK065693.1 gb:AK099855.1 REP_OR	LOC_Os08g42700		unspliced-genomic resistance protein, putative, expressed		AT3G07040	4e-68	258544_at
Os.49225.1.S1_at	94.2	67.2	65	82.9	271.2	477.2	119.2	44.7	67.4	97.4	2.4	0.0179	0.0172223		282.8	108.1	74.4	144.5	719.8	1466.9	413.3	120.6	79.6	194.4	3.2	0.01093	0.0111381		0.989969	2.8		gb:AK099855.1 DB_XREF=gi:32985064 TID=Os.49225.1 CNT=8 FEA=FLmRNA TIER=FL STK=1 UG=Os.49225 UG_TITLE=PibH8 mRNA, complete cds DEF=Oryza sativa (japonica cultivar-group) cDNA clone:J013110K12, full insert sequence. FL=gb:AB013451.1 gb:AK065372.1	LOC_Os08g42700		unspliced-genomic resistance protein, putative, expressed		AT3G07040	4e-68	258544_at
Os.27814.1.S1_at	244.2	346	445.7	544.7	465.5	368.7	223.5	372.8	400	464.2	20.4	0.00094	0.00417365		295.7	518.4	578.3	589.7	571.7	431.5	234.4	469.7	552	807.9	19.6	0.00367	0.0035504		0.841678	20		gb:AY371050.1 DB_XREF=gi:34558724 TID=Os.27814.1 CNT=7 FEA=FLmRNA TIER=FL STK=2 UG=Os.27814 DEF=Oryza sativa (japonica cultivar-group) topoisomerase 6 subunit B-like protein mRNA, complete cds. PROD=topoisomerase 6 subunit B-like protein FL=gb:A	LOC_Os09g10770		unspliced-genomic type II DNA topoisomerase VI subunit B, putative, expressed		AT3G20780	0	257982_at
Os.12096.4.S1_s_at	14291.3	18060.2	5036.9	3959.1	4160.7	4646.3	3561.7	22692.5	7988.2	5448.3	11.6	0.07407	0.0397008		13647.8	28400.8	11972	5403.1	5258.6	5135.4	4422.1	29240.6	9428.1	6302.6	12.4	0.0475	0.03596		0.948834	12		gb:AY324879.1 DB_XREF=gi:34538930 TID=Os.12096.4 CNT=1 FEA=FLmRNA TIER=FL STK=1 UG=Os.12096 DEF=Oryza sativa (japonica cultivar-group) ferritin mRNA, complete cds. PROD=ferritin FL=gb:AY324879.1 REP_ORG=O. sativa	LOC_Os12g01530		unspliced-genomic ferritin-1, chloroplast precursor, putative, expressed		AT2G40300	9e-77	263831_at
Os.20531.1.S1_at	331.9	1900.5	821.9	392.9	123.6	67.6	228.2	1171.6	1205.2	316.1	13.6	0.0117	0.0144714		238.6	1505.5	1091.7	190	65.8	57.3	155.5	980.3	1417.9	237.4	14	0.0042	0.0104612		0.947056	13.8		gb:AF403129.1 DB_XREF=gi:22086628 GEN=RLK10 TID=Os.20531.1 CNT=7 FEA=FLmRNA TIER=FL STK=2 UG=Os.20531 DEF=Oryza sativa S-locus receptor-like kinase RLK10 (RLK10) mRNA, complete cds. PROD=S-locus receptor-like kinase RLK10 FL=gb:AF403129.1 REP_	LOC_Os04g54010		unspliced-genomic serine/threonine-protein kinase receptor precursor, putative		AT4G21380	1e-139	254416_at
Os.10024.1.S1_at	844.3	5650.2	6882.4	5515.8	2268.7	4341.9	407.6	4956.2	6719.5	4942.8	16.8	0.02195	0.0285738		685.1	6879	7034.2	4495.6	2443.7	4202.7	401.9	5349.4	7618.9	3878.8	16	0.04153	0.0338443		0.960004	16.4		gb:AK070304.1 DB_XREF=gi:32980328 TID=Os.10024.1 CNT=6 FEA=FLmRNA TIER=FL STK=2 UG=Os.10024 UG_TITLE=(japonica cultivar-group) cDNA clone:J023049B02, full insert sequence DEF=Oryza sativa (japonica cultivar-group) cDNA clone:J023049B02, full inse	LOC_Os04g45900		unspliced-genomic transposon protein, putative, unclassified, expressed		AT5G24380	0	249759_at
Os.8266.1.A1_at	264.9	271.5	288.4	300.5	388.4	444.2	397.5	250.3	368	320.9	2	0.12537	0.0383976		230.2	163.6	191.4	274.9	241	321.5	228.8	174.3	199.7	218.9	1.6	0.01363	0.0132218		0.657976	1.8		gb:AB116527.1 DB_XREF=gi:41351506 GEN=aos TID=Os.8266.1 CNT=4 FEA=FLmRNA TIER=FL STK=2 UG=Os.8266 DEF=Oryza sativa (japonica cultivar-group) aos mRNA for allene oxide synthase, complete cds. PROD=allene oxide synthase FL=gb:AK068620.1 gb:AB1165	LOC_Os03g55800		unspliced-genomic cytochrome P450 74A1, chloroplast precursor, putative, expressed		AT5G42650	1e-150	249208_at
Os.12706.1.S1_at	15485.7	22385.8	23499	14495.1	7346.2	4397.6	8254.7	28412.5	24031.4	18605.4	14.4	0.00056	0.00252281		13386.1	25521.5	27522.4	15157.8	7704.8	4663	6922.8	26197.3	22598.4	14452.2	14.4	0.00027	0.00182624		0.956403	14.4		gb:AY074786.1 DB_XREF=gi:28192424 GEN=DHAR TID=Os.12706.1 CNT=50 FEA=FLmRNA TIER=FL STK=2 UG=Os.12706 DEF=Oryza sativa dehydroascorbate reductase (DHAR) mRNA, complete cds. PROD=dehydroascorbate reductase FL=gb:AK070895.1 gb:AB037970.1 gb:AY074	LOC_Os05g02530		unspliced-genomic chloride intracellular channel 6, putative, expressed		AT1G75270	3e-83	256453_at
Os.4748.1.S1_at	1737.7	3172	7193.5	7092.1	4683.2	4125.2	1479.1	3580.5	5990.5	7289.5	19.6	0.00015	0.00242712		755.4	2708.7	7224.7	7724.2	4070.8	4582	1149.5	3259.4	6869.4	6583.7	19.2	0.00155	0.00769841		0.976213	19.4		gb:D38010.1 DB_XREF=gi:968901 TID=Os.4748.1 CNT=37 FEA=FLmRNA TIER=FL STK=2 UG=Os.4748 DEF=Oryza sativa (japonica cultivar-group) mRNA for ribosomal protein S8, complete cds. PROD=ribosomal protein S8 FL=gb:AK102757.1 gb:AK102402.1 gb:D38010.1	LOC_Os02g28810		unspliced-genomic 40S ribosomal protein S8, putative, expressed		AT5G20290	8e-95	246068_at
Os.1382.1.S1_at	3058.5	5188	9760	13110.9	10123.3	9690.8	4336.3	5247.6	9277.9	11459.5	21.2	0.0003	0.00187193		1312	3885.6	9584.2	12273.9	9730.1	10035.4	3114.9	4983.9	9689.3	10178.7	21.2	0.00239	0.0048822		0.983943	21.2		gb:AF022736.1 DB_XREF=gi:2570506 TID=Os.1382.1 CNT=29 FEA=FLmRNA TIER=FL STK=2 UG=Os.1382 DEF=Oryza sativa ribosomal protein mRNA, complete cds. PROD=ribosomal protein FL=gb:AF022736.1 gb:AK070605.1 REP_ORG=O. sativa	LOC_Os05g11710		unspliced-genomic 60S ribosomal protein L11, putative, expressed		AT5G45775	5e-85	254617_s_at
Os.9377.1.S1_at	2006.6	2252.7	2123.3	1842.6	1917.4	2064.5	1931.4	2492.9	2186.3	1852.6	12.4	0.05676	0.0363692		1638	2171.2	1988.1	2108.3	1673.4	1921.6	1779.8	2446.3	2277.8	1848.5	14.8	0.08487	0.0283168		0.748033	13.6		gb:AF443601.1 DB_XREF=gi:17149109 TID=Os.9377.1 CNT=18 FEA=FLmRNA TIER=FL STK=2 UG=Os.9377 DEF=Oryza sativa clathrin assembly protein AP17-like protein mRNA, complete cds. PROD=clathrin assembly protein AP17-like protein FL=gb:AK104086.1 gb:AF44	LOC_Os12g10560		unspliced-genomic AP-2 complex subunit sigma-1, putative, expressed		AT1G47830	6e-75	261733_at
Os.9166.1.S1_a_at	14577.2	12299.8	4082.9	3967.7	7425.2	8444.2	14750.6	8924.1	4510.9	4003.6	7.6	0.00082	0.00672071		17771.1	12990.2	4960.9	4486.9	7394.6	7878.8	13622.3	9953.1	4839.4	4639.9	8	0.00336	0.0155655		0.969354	7.8		gb:AY151044.1 DB_XREF=gi:24850306 TID=Os.9166.1 CNT=16 FEA=FLmRNA TIER=FL STK=2 UG=Os.9166 DEF=Oryza sativa (japonica cultivar-group) transcription factor MYBS3 mRNA, complete cds. PROD=transcription factor MYBS3 FL=gb:AK101062.1 gb:AY151044.1	LOC_Os10g41200	MYB-related	unspliced-genomic ZmMybst1, putative, expressed		AT5G47390	5e-81	248795_at
Os.7990.1.S1_at	1251.6	1769.5	2191.9	2494.6	2412.5	2295.6	1699.4	2038.4	2336.1	2461.4	20.8	0.00684	0.00441212		1243.6	2397.7	2671.9	3056.3	2938.8	2575.1	1640.8	2019.5	2550.9	2668.4	20.8	0.00864	0.00582492		0.919011	20.8		gb:D10335.1 DB_XREF=gi:391878 GEN=Adk-b TID=Os.7990.1 CNT=23 FEA=FLmRNA TIER=FL STK=2 UG=Os.7990 DEF=Oryza sativa mRNA for adenylate kinase-b, complete cds. PROD=adenylate kinase-b FL=gb:AK073605.1 gb:D10335.1 REP_ORG=O. sativa	LOC_Os11g20790		unspliced-genomic adenylate kinase B, putative, expressed		AT5G63400	3e-118	247382_at
Os.1120.1.S1_at	528.3	547	650.4	861.1	818.5	571.7	517.8	752.7	771.2	952.4	20.4	0.00649	0.0154595		436.5	520.3	832.4	1018.3	769.2	805.4	581.5	735.3	770.8	1076.9	20.8	0.00536	0.0050822		0.839779	20.6		gb:AB110195.1 DB_XREF=gi:32352187 TID=Os.1120.1 CNT=14 FEA=FLmRNA TIER=FL STK=2 UG=Os.1120 UG_TITLE=(japonica cultivar-group) mRNA for hypothetical protein, complete cds, clone: 23C4AG017 DEF=Oryza sativa (japonica cultivar-group) mRNA for hypoth	LOC_Os06g16270		unspliced-genomic heat shock factor binding protein 2, putative, expressed
Os.1120.1.S1_s_at	1187.8	1316	2016.5	2016.5	2099.2	1459.2	1295	2068.2	2052.9	2163.2	19.2	0.01032	0.0195464		1258.4	1132.4	2038.9	2520.3	1812.7	1622	1265	1954	2366	2542.5	19.6	0.00362	0.010442		0.884574	19.4		gb:AB110195.1 DB_XREF=gi:32352187 TID=Os.1120.1 CNT=14 FEA=FLmRNA TIER=FL STK=2 UG=Os.1120 UG_TITLE=(japonica cultivar-group) mRNA for hypothetical protein, complete cds, clone: 23C4AG017 DEF=Oryza sativa (japonica cultivar-group) mRNA for hypoth	LOC_Os06g16270		unspliced-genomic heat shock factor binding protein 2, putative, expressed
Os.11244.1.S1_at	49.2	92.7	174.8	120.9	12.7	40.5	13.8	96.7	189.7	210.3	17.2	0.00454	0.00247778		29.3	122.4	164.2	111.9	113.7	43.3	40	119.7	147.7	118.8	17.2	0.00183	0.00850779		0.721781	17.2		gb:AB066094.1 DB_XREF=gi:19911777 GEN=Wx-b TID=Os.11244.1 CNT=15 FEA=FLmRNA TIER=FL STK=2 UG=Os.11244 DEF=Oryza sativa (japonica cultivar-group) Wx-b mRNA for starch granule-bond starch syntase, complete cds. PROD=starch granule-bond starch synt	LOC_Os06g04200		unspliced-genomic granule-bound starch synthase 1, chloroplast precursor, putative, expressed		AT1G32900	0	261191_at
Os.11244.1.S1_x_at	34.3	38.5	111	64.2	33.8	50.9	40.3	65.1	126	128.7	17.6	0.03419	0.0142587		60	72	126.3	62.2	64.9	40.9	46.5	93.9	101.7	74.6	15.6	0.01106	0.0155655		0.671273	16.6		gb:AB066094.1 DB_XREF=gi:19911777 GEN=Wx-b TID=Os.11244.1 CNT=15 FEA=FLmRNA TIER=FL STK=2 UG=Os.11244 DEF=Oryza sativa (japonica cultivar-group) Wx-b mRNA for starch granule-bond starch syntase, complete cds. PROD=starch granule-bond starch synt	LOC_Os06g04200		unspliced-genomic granule-bound starch synthase 1, chloroplast precursor, putative, expressed		AT1G32900	0	261191_at
Os.8701.1.S1_at	4428.7	5369.4	3426.1	2658.5	3262.8	3063.4	3629.3	4911.5	4804.7	3109.8	12	0.01644	0.0112399		3581.4	4453	2409.2	2487.4	2448.7	2484.3	3014.8	4907.2	3636.5	2352.5	11.6	0.02171	0.0175856		0.923876	11.8		gb:AK059891.1 DB_XREF=gi:32969909 TID=Os.8701.1 CNT=17 FEA=FLmRNA TIER=FL STK=2 UG=Os.8701 UG_TITLE=(japonica cultivar-group) isolate 20551 putative serinethreonine kinase mRNA, complete cds DEF=Oryza sativa (japonica cultivar-group) cDNA clone:0	LOC_Os08g02420		unspliced-genomic calmodulin, putative, expressed		AT1G12310	1e-60	259538_at
Os.4190.1.S1_at	2749.5	1596.4	1297.2	1186.1	1174.6	1252.5	2017.4	2210	1460	1208.3	9.2	0.02299	0.0106103		3350.7	1743.4	1500	1330.8	1018.4	1204.6	1903.1	2328.3	1524.5	1191.8	9.6	0.05868	0.0131504		0.97111	9.4		gb:AB032761.1 DB_XREF=gi:5931624 GEN=rab5B TID=Os.4190.1 CNT=12 FEA=FLmRNA TIER=FL STK=2 UG=Os.4190 UG_TITLE=(japonica cultivar-group) rab5B mRNA, complete cds DEF=Oryza sativa (japonica cultivar-group) rab5B mRNA, complete cds. FL=gb:AB032761.	LOC_Os03g05740		unspliced-genomic ras-related protein RHN1, putative, expressed		AT3G54840	4e-84	251817_at
Os.48663.1.A1_s_at	7446.6	4315.3	3109.6	2745.3	3436.6	3556	6377.5	4786.2	3344.7	2700.4	8	0.00712	0.00781292		8223.8	4302.9	3190.5	2784.1	3114.3	3402	6412.2	3721.1	2780.8	2667.8	7.6	0.02651	0.0219551		0.971027	7.8		gb:CR286706 DB_XREF=gi:44673272 DB_XREF=CR286706 CLONE=y697h03p3 TID=Os.48663.1 CNT=3 FEA=EST TIER=ConsEnd STK=1 UG=Os.48663 UG_TITLE=Transcribed sequence with moderate similarity to protein ref:NP_567008.1 (A.thaliana) small GTP-binding protein	LOC_Os03g05740		unspliced-genomic ras-related protein RHN1, putative, expressed		AT3G54840	4e-84	251817_at
Os.4171.1.S1_s_at	7054.2	5355.8	4915.6	6740.6	7587	9497.5	8423.2	5948.3	4991	6482	3.2	0.00039	0.00154296		7776.6	5110.8	4866.6	6696.6	8285.4	9066.8	8588.9	5563.1	5144.3	6181.8	3.2	3e-05	0.00109997		0.965713	3.2		gb:AB003322.1 DB_XREF=gi:5295977 TID=Os.4171.1 CNT=18 FEA=FLmRNA TIER=FL STK=2 UG=Os.4171 DEF=Oryza sativa (japonica cultivar-group) mRNA for MADS box-like protein, complete cds, clone:C50086. PROD=MADS box-like protein FL=gb:AK070121.1 gb:AB003	LOC_Os02g52340	MADS	unspliced-genomic MADS-box transcription factor 22, putative, expressed		AT2G22540	1e-58	264054_at
Os.175.1.S1_at	6253.6	18054	9425.9	2046.9	1676.8	3831.8	2081.3	24892.8	12416.4	4196.2	12.8	0.02719	0.0237354		8612.2	33904.6	17726.7	3271.1	2822.5	2834.2	2008	28234.6	10147.3	3783.9	12.8	0.03008	0.0237976		0.913408	12.8		gb:D84392.1 DB_XREF=gi:1304214 GEN=PSII-S TID=Os.175.1 CNT=16 FEA=FLmRNA TIER=FL STK=2 UG=Os.175 DEF=Oryza sativa (japonica cultivar-group) PSII-S mRNA for 22 kDa protein of photosystem II precursor, complete cds. PROD=22 kDa protein of photosys	LOC_Os04g59440		unspliced-genomic photosystem II 22 kDa protein, chloroplast precursor, putative, expressed		AT1G44575	4e-70	245213_at
Os.10215.1.S1_at	1911.4	929.2	710.4	1250.9	1726.8	2263.9	1937.4	621.5	780.2	1143.6	3.6	0.0001	0.0108602		1412.8	444.2	429.7	1652	1252.5	1959.2	1946.2	251.7	696.5	880.2	2.8	0.0219	0.019582		0.900067	3.2		gb:D13817.1 DB_XREF=gi:427592 TID=Os.10215.1 CNT=15 FEA=FLmRNA TIER=FL STK=2 UG=Os.10215 DEF=Oryza sativa (japonica cultivar-group) mRNA for lactate dehydrogenase, complete cds. PROD=lactate dehydrogenase FL=gb:AK105416.1 gb:AK103257.1 gb:D13817	LOC_Os02g01510		unspliced-genomic L-lactate dehydrogenase A, putative, expressed		AT4G17260	2e-122	245324_at
Os.9298.1.S1_at	2821.1	2067.9	2426.2	2403.6	2814.7	2835.8	2438	2222.4	2606.1	2543.8	2	0.06221	0.0267718		3000.5	2060	2438.4	2525.2	2738.6	2350.4	2250.9	1931	2237.4	2786.3	0.4	0.21727	0.0210053		0.6971	1.2		gb:AB125306.1 DB_XREF=gi:46917337 GEN=SAPK5 TID=Os.9298.1 CNT=11 FEA=FLmRNA TIER=FL STK=2 UG=Os.9298 DEF=Oryza sativa (japonica cultivar-group) SAPK5 mRNA for serinethreonine protein kinase SAPK5, complete cds. PROD=serinethreonine protein kinas	LOC_Os04g59450		unspliced-genomic serine/threonine-protein kinase SAPK5, putative, expressed		AT1G10940	6e-145	260480_at
Os.5240.1.S1_at	1672.5	1400.6	1571.3	1942.3	2252.9	2324.9	2390.2	1766.1	1617.6	1963.6	2.4	0.0178	0.00175353		1936.8	1477.3	1501	1895.2	2088.9	2172.6	2689.2	1500.8	1710.7	2322.8	2.4	0.10472	0.031456		0.843486	2.4		gb:AB110173.1 DB_XREF=gi:32352143 TID=Os.5240.1 CNT=10 FEA=FLmRNA TIER=FL STK=2 UG=Os.5240 DEF=Oryza sativa (japonica cultivar-group) mRNA for ankyrin, complete cds, clone: 13YPB030. PROD=ankyrin FL=gb:AK071604.1 gb:AB110173.1 REP_ORG=O. sativa	LOC_Os10g43040		unspliced-genomic ankyrin-1, putative, expressed		AT4G19150	2e-59	254613_at
Os.3767.1.S1_at	1446.5	2167.8	2932.6	1568.3	1608.5	1650.6	1083.5	2496.2	3155.9	1558.3	15.2	0.04	0.0338555		1625.8	2053	2432.3	1819.8	1436.4	1384.2	1334.2	2382.6	3035.3	1606.2	15.2	0.00848	0.0118314		0.94719	15.2		gb:AB030211.1 DB_XREF=gi:9453849 GEN=osr8 TID=Os.3767.1 CNT=10 FEA=FLmRNA TIER=FL STK=2 UG=Os.3767 DEF=Oryza sativa osr8 mRNA for hydrophobic polypeptide, complete cds. PROD=hydrophobic polypeptide FL=gb:AB030211.1 gb:AK062410.1 REP_ORG=O. sat	LOC_Os09g38560		unspliced-genomic expressed protein		AT4G28088	1e-13
Os.3294.1.S1_at	398.6	295.9	377.1	369.5	514.7	481.3	356.1	333.5	352.6	321.1	2	0.02357	0.0146499		380.5	386.8	368.7	395.2	557.5	545.8	384.7	375.1	413.5	494.5	0.8	0.0109	0.0100948		0.711778	1.4		gb:AF372832.1 DB_XREF=gi:13991926 TID=Os.3294.1 CNT=11 FEA=FLmRNA TIER=FL STK=2 UG=Os.3294 DEF=Oryza sativa hexokinase II mRNA, complete cds. PROD=hexokinase II FL=gb:AK059853.1 gb:AF372832.1 REP_ORG=O. sativa	LOC_Os07g09890		unspliced-genomic hexokinase-1, putative, expressed		AT1G47840	4e-148	261729_s_at
Os.189.1.S1_at	2076.5	1776.6	380.4	591.7	1107	1480.6	2242.6	1045.2	483.6	670.8	6.8	0.00121	0.00982041		1244.6	1200.9	418.2	547.6	918.2	1376.2	1582	999.3	353.6	452.8	6.4	0.00012	0.00367215		0.941135	6.6		gb:D87261.1 DB_XREF=gi:2580439 TID=Os.189.1 CNT=11 FEA=FLmRNA TIER=FL STK=2 UG=Os.189 DEF=Oryza sativa (japonica cultivar-group) mRNA for PCF2, complete cds. PROD=PCF2 FL=gb:D87261.1 gb:AK119660.1 gb:AK102666.1 gb:AK060536.1 REP_ORG=O. sativa	LOC_Os08g43160	TCP	unspliced-genomic TCP family transcription factor containing protein, expressed		AT2G45680	2e-37	267515_at
Os.17065.1.S1_at	1495.7	1431	1453.7	2930.6	1750.7	1681	1119.1	889.3	1106	1909.4	22.8	0.07268	0.0216963		491.9	740	915.8	1341.1	1197.1	1245.5	933.3	543.1	911.8	1044.3	23.2	0.01161	0.00354374		0.691384	23		gb:AY302059.1 DB_XREF=gi:31872115 GEN=ZIP2 TID=Os.17065.1 CNT=9 FEA=FLmRNA TIER=FL STK=2 UG=Os.17065 DEF=Oryza sativa (japonica cultivar-group) zinc transporter (ZIP2) mRNA, complete cds. PROD=zinc transporter FL=gb:AK121551.1 gb:AY302059.1 RE	LOC_Os03g29850		unspliced-genomic zinc transporter 2 precursor, putative, expressed		AT1G55910	5e-85	260601_at
Os.15732.1.S1_s_at	10700.1	10212.1	11507.3	15523.6	10853	10527.1	7672.7	8376.6	9866.1	12686	21.2	0.04697	0.0137516		5071.1	7513.4	8271.7	12029.2	8970.3	9963.5	7620.8	6423.8	8530.9	8955.9	22	0.03903	0.012848		0.682447	21.6		gb:AU032700 DB_XREF=gi:3768673 DB_XREF=AU032700 CLONE=S13705_6Z TID=Os.15732.1 CNT=1 FEA=EST TIER=ConsEnd STK=1 UG=Os.15732 UG_TITLE=Transcribed sequence REP_ORG=O. sativa	LOC_Os03g29850		unspliced-genomic zinc transporter 2 precursor, putative, expressed		AT1G55910	5e-85	260601_at
Os.372.1.S1_a_at	1438.6	3169.9	4660.9	3497.2	1697.9	1209.5	782.1	3055	3967.4	3510.4	16.8	5e-05	0.0017758		847.2	3835.2	4950.1	3934.8	1999.8	1558.3	655.7	2940.1	4688	2923.9	16.8	0.00108	0.00470449		0.956883	16.8		gb:AY078072.1 DB_XREF=gi:19071786 GEN=g6pdh TID=Os.372.1 CNT=7 FEA=FLmRNA TIER=FL STK=2 UG=Os.372 DEF=Oryza sativa glucose-6-phosphate dehydrogenase (g6pdh) mRNA, complete cds. PROD=glucose-6-phosphate dehydrogenase FL=gb:AK067410.1 gb:AY078072	LOC_Os04g40874		unspliced-genomic glucose-6-phosphate 1-dehydrogenase, cytoplasmic isoform, putative, expressed		AT5G40760	1e-105	249372_at
Os.7297.1.S1_at	159.7	106.9	426.6	883.9	493.1	339.2	203.5	138.7	364.4	712.7	21.6	0.00102	0.00565267		98.3	143.3	425.6	720.5	642.1	378.9	156.4	206.7	377.9	869.1	21.6	3e-05	0.00439547		0.932745	21.6		gb:AY277897.2 DB_XREF=gi:41056567 GEN=rad50 TID=Os.7297.1 CNT=8 FEA=FLmRNA TIER=FL STK=2 UG=Os.7297 DEF=Oryza sativa (japonica cultivar-group) DNA repair-recombination protein (rad50) mRNA, complete cds. PROD=DNA repair-recombination protein FL	LOC_Os02g29464		unspliced-genomic DNA repair protein RAD50, putative, expressed		AT2G31970	0	265678_at
Os.18587.1.S1_at	63	90.5	63.8	7.1	2.4	15.4	23	117.9	93	74.2	13.6	0.01563	0.00358959		10.2	81.8	110.2	7	2.5	18.4	52.6	83.4	49.5	34	13.6	0.0199	0.00999551		0.650971	13.6		gb:AY323488.1 DB_XREF=gi:33087080 GEN=HS1 TID=Os.18587.1 CNT=7 FEA=FLmRNA TIER=FL STK=2 UG=Os.18587 DEF=Oryza sativa (japonica cultivar-group) heat stress protein (HS1) mRNA, complete cds. PROD=heat stress protein FL=gb:AY344487.1 gb:AY323488.1	LOC_Os07g08140	HSF	unspliced-genomic heat shock factor protein HSF30, putative, expressed		AT3G22830	2e-86	258325_at
Os.2325.1.S1_at	1449.5	531.2	403	276.6	290.7	293.1	697.5	520.2	427.4	361	8.8	0.13045	0.0395699		783.1	506.5	262.1	288.2	286.4	199.5	613.8	360.5	370.6	132.3	9.2	0.04444	0.0209075		0.883343	9		gb:AF148877.1 DB_XREF=gi:4973430 TID=Os.2325.1 CNT=7 FEA=FLmRNA TIER=FL STK=2 UG=Os.2325 DEF=Oryza sativa subsp. indica putative aldehyde dehydrogenase OS-ALDH mRNA, complete cds. PROD=putative aldehyde dehydrogenase OS-ALDH FL=gb:AF148877.1 gb:	LOC_Os02g43194		unspliced-genomic fatty aldehyde dehydrogenase, putative, expressed		AT4G36250	1e-147	253083_at
Os.6876.1.S1_at	1277.1	2931.1	2482.7	2371.2	2476.8	1735.7	1599	1687	3012.1	2855.8	18.4	0.03296	0.0214412		1148.4	2355.4	3142.5	3562.4	2197.5	1889.8	1461.1	1949.7	3811.6	3179.8	18.4	0.0003	0.00550286		0.814054	18.4		gb:AK107879.1 DB_XREF=gi:32993088 TID=Os.6876.1 CNT=7 FEA=FLmRNA TIER=FL STK=2 UG=Os.6876 UG_TITLE=(japonica cultivar-group) cDNA clone:002-134-D04, full insert sequence DEF=Oryza sativa (japonica cultivar-group) cDNA clone:002-134-D04, full inse	LOC_Os04g38950		unspliced-genomic anthranilate synthase component II, putative, expressed		AT1G25220	1e-92	247864_s_at
Os.8833.1.S1_at	175.2	278.1	111.7	62.9	86.1	131.9	153.4	236.5	135.7	104.5	10.8	0.00992	0.0182553		140.5	300.7	149.6	94	76.7	69.6	142.1	244.6	161.7	113.1	12.4	0.00655	0.0113		0.902008	11.6		gb:AB101647.1 DB_XREF=gi:31339100 GEN=Roc4 TID=Os.8833.1 CNT=6 FEA=FLmRNA TIER=FL STK=2 UG=Os.8833 DEF=Oryza sativa (japonica cultivar-group) Roc4 mRNA for GL2-type homeodomain protein, complete cds. PROD=GL2-type homeodomain protein FL=gb:AK11	LOC_Os04g48070	HB	unspliced-genomic homeobox protein OCL1, putative, expressed		AT4G00730	0	255636_at
Os.4124.1.S1_a_at	1214.4	2757.8	3873.8	3050.2	2182.6	1961.4	1343.9	3093.4	3561.9	2842	16.8	0.00143	0.00770573		1127.2	3602	4630.1	3573.5	2505.6	2226.1	1341.1	4266.3	4722	3811.3	16.8	0.00183	0.00747392		0.983451	16.8		gb:AF271294.1 DB_XREF=gi:14279469 TID=Os.4124.1 CNT=6 FEA=FLmRNA TIER=FL STK=2 UG=Os.4124 DEF=Oryza sativa C3meo4 mRNA, complete cds. PROD=C3meo4 FL=gb:AF271294.1 REP_ORG=O. sativa	LOC_Os01g51390		unspliced-genomic mitochondrial-processing peptidase beta subunit, mitochondrial precursor, putative, expressed		AT3G02090	8e-149	258862_at
Os.9466.1.S1_a_at	1062.6	390.4	905.8	1711.7	1489.4	1329.1	1428.5	274.4	685.1	1627.5	0.4	0.01151	0.0184658		1755.6	293	658.3	2575.5	1895.2	1629.6	1792	195.8	1149.2	2684.1	0	0.03537	0.0259872		0.942373	0.2		gb:AF402792.1 DB_XREF=gi:15430706 TID=Os.9466.1 CNT=5 FEA=FLmRNA TIER=FL STK=2 UG=Os.9466 DEF=Oryza sativa (japonica cultivar-group) clone C61372_1A putative glutathione S-transferase OsGSTZ2 mRNA, complete cds. PROD=putative glutathione S-transf	LOC_Os12g10730		unspliced-genomic glutathione S-transferase, putative, expressed		AT2G02380	3e-42	266236_at
Os.28011.1.S1_at	16013.8	11612.3	19058.7	27567.5	25157.9	13916.1	14675.8	11619.2	17632.1	22697.5	22	0.00298	0.00835886		4441.7	14800.1	16076.1	29789.7	22692.2	22241.5	8311.3	7561.2	15990.1	18397	22	0.01227	0.00547133		0.706709	22		gb:AY256682.1 DB_XREF=gi:30060268 TID=Os.28011.1 CNT=5 FEA=FLmRNA TIER=FL STK=2 UG=Os.28011 DEF=Oryza sativa (indica cultivar-group) putative brown planthopper-inducible protein BpHi008A mRNA, complete cds. PROD=putative brown planthopper-inducib	LOC_Os06g29730		unspliced-genomic expressed protein
Os.15037.1.S2_at	56.1	156.6	540.1	633.2	408.7	275	97.1	208.4	463.7	534.5	20	5e-05	0.00218689		94	172.3	774.7	546.4	480.5	331.9	86.5	369.6	622.2	809.6	19.2	0.00172	0.0053752		0.912845	19.6		gb:AB047689.2 DB_XREF=gi:19912794 GEN=OsPolI-like TID=Os.15037.1 CNT=6 FEA=FLmRNA TIER=FL STK=2 UG=Os.15037 DEF=Oryza sativa mRNA for PolI-like DNA polymerase, complete cds. PROD=PolI-like DNA polymerase FL=gb:AB047689.2 gb:AK103236.1 gb:AK1109	LOC_Os08g07840		unspliced-genomic 3-5 exonuclease/ DNA binding protein, putative, expressed		AT1G50840	0	256204_at
Os.15037.1.S1_a_at	76.6	65.9	133.2	138.5	122.9	73.7	101	95.6	134.8	149.1	19.6	0.00531	0.0157972		210.3	204.1	291.4	323.1	220.8	257.6	156.9	249	232.8	369.1	20	0.03623	0.0267212		0.637111	19.8		gb:AK110978.1 DB_XREF=gi:32996187 TID=Os.15037.1 CNT=6 FEA=FLmRNA TIER=FL STK=1 UG=Os.15037 UG_TITLE=MRNA for PolI-like DNA polymerase, complete cds DEF=Oryza sativa (japonica cultivar-group) cDNA clone:002-174-C06, full insert sequence. FL=gb:A	LOC_Os08g07840		unspliced-genomic 3-5 exonuclease/ DNA binding protein, putative, expressed		AT1G50840	0	256204_at
Os.57417.1.S1_s_at	7173.5	4611	430.7	73.9	78.3	682.3	7464.4	5585.7	1413.6	84.7	9.2	0.0022	0.00488769		9377	5389	879.7	106.6	150	941	8601.3	8019.6	1286.8	72.9	9.2	0.00224	0.00434871		0.991722	9.2		gb:AB096071.1 DB_XREF=gi:30698517 TID=Os.57417.1 CNT=5 FEA=FLmRNA TIER=FL STK=2 UG=Os.57417 UG_TITLE=(japonica cultivar-group) mRNA for plastid sigma factor SIG5, complete cds DEF=Oryza sativa (japonica cultivar-group) mRNA for plastid sigma fact	LOC_Os05g50930	Sigma70-like	unspliced-genomic RNA polymerase sigma factor rpoD, putative, expressed		AT5G24120	6e-86	249769_at
Os.21561.1.S1_at	412	336.8	441.9	660	777.7	790	540.6	316.8	394.9	616.9	0.8	5e-05	0.000809481		306.7	294.6	361.4	654.5	956.5	696.2	530.7	287.8	435.9	738.7	0	0.00018	0.00144804		0.927784	0.4		gb:AF456246.1 DB_XREF=gi:22652529 GEN=YR14 TID=Os.21561.1 CNT=4 FEA=FLmRNA TIER=FL STK=2 UG=Os.21561 DEF=Oryza sativa (japonica cultivar-group) NBS-LRR-like protein (YR14) mRNA, complete cds. PROD=NBS-LRR-like protein FL=gb:AK066438.1 gb:AF4562	LOC_Os08g19980		unspliced-genomic disease resistance RPP13-like protein 1, putative, expressed		AT3G14470	1e-91	257277_at
Os.4379.1.S1_at	1928.5	1585.4	1056.2	1448.6	2016.2	2456.6	2009.3	1560.6	1158.8	1454.6	4	2e-05	0.00135981		2031.7	1716.9	1304.2	1307.8	1779.2	2099.8	2086.3	1426	1093	1405.4	5.2	5e-05	0.00246892		0.905785	4.6		gb:AY323482.1 DB_XREF=gi:33087068 GEN=aba1 TID=Os.4379.1 CNT=6 FEA=FLmRNA TIER=FL STK=2 UG=Os.4379 DEF=Oryza sativa (japonica cultivar-group) bZIP transcription factor (aba1) mRNA, complete cds. PROD=bZIP transcription factor FL=gb:AY323482.1 g	LOC_Os08g36790	bZIP	unspliced-genomic bZIP transcription factor ABI5, putative, expressed		AT1G49720	4e-44	261613_at
Os.3381.1.S1_a_at	617	1103.9	3267.3	2997.4	1396.9	1404.1	386.3	1319.1	2819.1	3183.9	18.8	0.00056	0.0042048		268.6	1072.7	2795.1	2763.7	1361.8	1273.7	214.4	1442.8	3141.4	3258.4	18.8	0.00025	0.00280137		0.979135	18.8		gb:AB011270.1 DB_XREF=gi:3983662 TID=Os.3381.1 CNT=5 FEA=FLmRNA TIER=FL STK=2 UG=Os.3381 DEF=Oryza sativa (japonica cultivar-group) mRNA for importin-beta1, complete cds. PROD=importin-beta1 FL=gb:AK065625.1 gb:AB011270.1 REP_ORG=O. sativa	LOC_Os05g28510		unspliced-genomic importin beta-1 subunit, putative, expressed		AT5G53480	0	248272_at
Os.47313.1.A1_at	29.6	28.3	62.2	88.8	75	27.4	2.8	41.2	85.1	142.9	20	0.00235	0.0118178		1.9	52.6	50.5	42.1	73.8	25.9	38.4	36.8	62	101.2	20	0.07226	0.0274885		0.773906	20		gb:AB004461.1 DB_XREF=gi:2826899 TID=Os.47313.1 CNT=3 FEA=FLmRNA TIER=FL STK=2 UG=Os.47313 DEF=Oryza sativa mRNA for DNA polymerase alpha catalytic subunit, complete cds. PROD=DNA polymerase alpha catalytic subunit FL=gb:AB004461.1 gb:AK103345.1	LOC_Os01g64820		unspliced-genomic DNA polymerase alpha catalytic subunit, putative, expressed		AT5G67100	0	247028_at
Os.9144.1.S1_a_at	215.7	327.9	451.3	556.6	477.8	366.1	240.7	288.4	571.7	501.3	20	0.00046	0.00625663		155.3	373.5	619.8	536.1	589.9	504.6	142.1	422.3	472.5	538.2	20.4	0.019	0.0160463		0.797301	20.2		gb:AB111516.1 DB_XREF=gi:46091156 GEN=OsRadA TID=Os.9144.1 CNT=3 FEA=FLmRNA TIER=FL STK=2 UG=Os.9144 DEF=Oryza sativa (japonica cultivar-group) OsRadA mRNA for RadA-like protein, complete cds. PROD=RadA-like protein FL=gb:AK102866.1 gb:AB111516	LOC_Os06g05820		unspliced-genomic DNA repair protein radA, putative, expressed		AT5G50340	2e-163	248555_at
Os.3905.1.S1_at	336.4	422.7	465.8	613.8	507.2	505.9	379.3	453.6	392.4	632.9	21.6	0.0164	0.0134175		312.8	498.6	528.8	584	550.2	599.1	320.1	519.5	490.2	640.7	20.8	0.05297	0.0302917		0.860485	21.2		gb:AB038234.1 DB_XREF=gi:9796395 GEN=cycH-1 TID=Os.3905.1 CNT=3 FEA=FLmRNA TIER=FL STK=2 UG=Os.3905 DEF=Oryza sativa cycH-1 mRNA for cyclin H-1, complete cds. PROD=cyclin H-1 FL=gb:AB038234.1 gb:AK105468.1 gb:AK101854.1 REP_ORG=O. sativa	LOC_Os03g52750		unspliced-genomic cyclin-H, putative, expressed		AT5G27620	2e-99	246762_at
Os.3769.1.S1_a_at	547.9	399.9	369.6	462.1	730	749.6	313.6	383.7	252	557.9	1.6	0.00837	0.00811148		361.9	291	309.7	612.2	731.9	939	309.3	387.1	298.6	552.4	1.2	0.00541	0.00791507		0.875755	1.4		gb:AB037418.1 DB_XREF=gi:9453919 GEN=UMPS2 TID=Os.3769.1 CNT=3 FEA=FLmRNA TIER=FL STK=2 UG=Os.3769 DEF=Oryza sativa (japonica cultivar-group) UMPS2 mRNA for UMP synthase 2, complete cds. PROD=UMP synthase 2 FL=gb:AB037418.1 REP_ORG=O. sativa	LOC_Os01g72250		unspliced-genomic uridine 5-monophosphate synthase, putative, expressed		AT3G54470	3e-165
Os.2329.1.S1_a_at	44371.8	52347	41403.3	30998.9	31768	35573.4	42353.2	48030.6	43704.6	34346.8	11.6	9e-05	0.00212149		52447.7	46066.1	46382.3	37741.5	38962.3	30448.3	43064.5	43018.9	38453.7	31428.4	11.2	0.1022	0.0259914		0.64129	11.4		gb:AF182806.1 DB_XREF=gi:5917782 TID=Os.2329.1 CNT=3 FEA=FLmRNA TIER=FL STK=2 UG=Os.2329 DEF=Oryza sativa carbonic anhydrase 3 mRNA, complete cds. PROD=carbonic anhydrase 3 FL=gb:AF182806.1 gb:U08404.1 REP_ORG=O. sativa	LOC_Os01g45274		unspliced-genomic carbonic anhydrase, chloroplast precursor, putative, expressed		AT5G14740	8e-65	246596_at
Os.13026.1.S1_at	2602.7	1992.4	2836.9	542.6	235.9	322.7	1893.6	3784.4	1769.5	542.8	12	0.00382	0.00984263		1812.1	3404.2	2141.4	401.7	156.5	525.3	919.3	2314.3	1520.6	481	12.4	0.00302	0.00398857		0.769686	12.2		gb:AB052943.1 DB_XREF=gi:14517621 GEN=Hd3a TID=Os.13026.1 CNT=3 FEA=FLmRNA TIER=FL STK=2 UG=Os.13026 UG_TITLE=(japonica cultivar-group) Hd3a (P0702F05.7), mRNA DEF=Oryza sativa (indica cultivar-group) Hd3a mRNA, complete cds, cultivar:Kasalath.	LOC_Os06g06320		unspliced-genomic OsFTL2 - Rice FT-Like2 homogous to Arabidopsis Flowering Locus T gene, expressed		AT1G65480	1e-67	264638_at
Os.428.1.S1_at	166.2	131.4	1292.8	877.9	246.3	552.3	326.5	147.1	1191.4	1259.3	18.8	0.03598	0.0318324		120.5	211.5	1258	1209.5	224.9	900.8	73.3	95	1168.6	1063.4	19.6	0.04664	0.0374452		0.927633	19.2		gb:AB054528.1 DB_XREF=gi:12313665 TID=Os.428.1 CNT=3 FEA=FLmRNA TIER=FL STK=2 UG=Os.428 UG_TITLE=(japonica cultivar-group) mRNA, complete cds, relating to carbonate stress DEF=Oryza sativa (japonica cultivar-group) mRNA, complete cds, relating to	LOC_Os03g55770		unspliced-genomic expressed protein
Os.9268.1.S1_at	6937.2	8705	13107.8	14987.5	12782.2	11881.3	8580.5	8114.8	12604.9	13647.8	21.2	0.00039	0.0019633		3773.7	5611	12807.4	14628.8	11713.8	11662.6	6792.3	7120.6	12497.7	12976.8	20.8	0.00239	0.00456684		0.982296	21		gb:U86017.1 DB_XREF=gi:1835728 TID=Os.9268.1 CNT=87 FEA=FLmRNA TIER=FL STK=1 UG=Os.9268 DEF=Oryza sativa ribosomal protein mRNA, complete cds. PROD=ribosomal protein FL=gb:AK058262.1 gb:U86017.1 REP_ORG=O. sativa	LOC_Os07g36254		unspliced-genomic 60S ribosomal protein L38, putative, expressed		AT3G59540	7e-30	251486_at
Os.8152.1.S1_at	10530.7	31448.2	22695.3	14336.1	13613.7	11167.1	10894.9	40224.5	26171.8	14288.3	14	0.03632	0.0246535		7526.3	36523	29073.8	14476.6	12738.9	13420.2	10801.8	38161	26490.5	12893.6	14	0.0298	0.019459		0.96478	14		gb:AB015972.1 DB_XREF=gi:18146759 GEN=OsRan2 TID=Os.8152.1 CNT=101 FEA=FLmRNA TIER=FL STK=1 UG=Os.8152 DEF=Oryza sativa (japonica cultivar-group) OsRan2 mRNA for small GTP-binding protein (Ran2), complete cds. PROD=small GTP-binding protein (Ran	LOC_Os05g49890		unspliced-genomic GTP-binding nuclear protein Ran-A1, putative, expressed		AT5G55190	2e-109	248107_at
Os.12286.1.S2_a_at	6237.5	2787.5	6922.6	8375.5	8418.2	10238.5	4253.4	2298.7	5552.3	8872	0	0.00399	0.0092463		5643.8	2925.3	5429.3	10247	9249.9	10868.7	4708.2	1412.3	5947.6	10456.7	0	0.00069	0.0171723		0.962209	0		gb:CB649218 DB_XREF=gi:29644211 DB_XREF=OSJNEb13A14.r CLONE=OSJNEb13A14 TID=Os.12286.1 CNT=72 FEA=FLmRNA TIER=Stack STK=6 UG=Os.12286 UG_TITLE=(japonica cultivar-group) mRNA for hypothetical protein, complete cds, clone: 14FPB077 FL=gb:AK068510	LOC_Os03g52690		unspliced-genomic CBS domain protein, putative, expressed		AT5G10860	1e-60	250409_at
Os.2618.1.S1_at	14108	16413	13065.3	6978.1	6443.6	5348.7	10587.2	19763.5	13986.9	9602.3	12.8	0.00109	0.00322001		15956.9	19527.8	15404.3	9933.8	7363.7	6585.9	11374.6	21171.7	14260.3	9287	12.4	0.00079	0.00321576		0.975408	12.6		gb:AF203879.1 DB_XREF=gi:11761653 TID=Os.2618.1 CNT=52 FEA=FLmRNA TIER=FL STK=1 UG=Os.2618 DEF=Oryza sativa peroxiredoxin mRNA, complete cds. PROD=peroxiredoxin FL=gb:AK058509.1 gb:AF203879.1 REP_ORG=O. sativa	LOC_Os01g48420		unspliced-genomic peroxiredoxin-5, mitochondrial precursor, putative, expressed		AT1G65970	7e-69	264923_s_at
Os.12693.1.S1_a_at	27207.3	38657.8	27125.9	8425.2	9895	12113.7	16685.2	35834.1	30024.6	7354	12.4	0.00151	0.00509338		30468.2	34397.8	28545.5	7240.5	8826	13209	16803.9	32460.9	26489.1	7119.3	12	0.00153	0.00362		0.979913	12.2		gb:AB050724.1 DB_XREF=gi:11094300 GEN=APXb TID=Os.12693.1 CNT=74 FEA=FLmRNA TIER=FL STK=1 UG=Os.12693 DEF=Oryza sativa (japonica cultivar-group) APXb mRNA for ascorbate peroxidase, complete cds. PROD=ascorbate peroxidase FL=gb:AB050724.1 gb:AK1	LOC_Os06g47710		unspliced-genomic leucine-rich repeat receptor-like kinase, putative, expressed		AT1G17240	5e-06	262530_at
Os.12693.5.S1_x_at	12705	32219.9	18155	3908.9	4251.3	5247.1	7716.2	33848	22800.1	3441.3	12.8	0.00526	0.0103659		17191.5	35472.3	24023.6	3570.4	3854.2	6170.5	6964.8	31442.7	23151.8	3520.5	12.8	0.00344	0.00679753		0.977944	12.8		gb:D25238.1 DB_XREF=gi:433216 TID=Os.12693.5 CNT=1 FEA=mRNA TIER=ConsEnd STK=0 UG=Os.12693 UG_TITLE=SS622 mRNA for ascorbate peroxidase, partial cds DEF=Oryza sativa SS622 mRNA for ascorbate peroxidase, partial cds. REP_ORG=O. sativa	LOC_Os07g49400		unspliced-genomic OsAPx2 - Cytosolic Ascorbate Peroxidase encoding gene, expressed		AT1G07890	2e-109	261412_at
Os.12772.1.S1_at	11497	10354.5	16046.2	17894.8	16355.3	15693.7	13258.2	10016.9	15985.5	17715.7	22	0.00199	0.00753349		7518.7	7997.6	14112.7	15462.3	13528.9	13886.6	10941.6	10429.5	13613.6	15803.4	21.6	0.00533	0.00365614		0.931397	21.8		gb:D12629.1 DB_XREF=gi:303856 TID=Os.12772.1 CNT=54 FEA=FLmRNA TIER=FL STK=1 UG=Os.12772 DEF=Oryza sativa (japonica cultivar-group) mRNA for ubiquitinribosomal polyprotein, ubiquitin, ribosomal protein, complete cds. PROD=ubiquitinribosomal polyp	LOC_Os03g13170		unspliced-genomic ubiquitin fusion protein, putative, expressed		AT3G52590	5e-69	252056_at
Os.12288.1.S1_at	593.1	159	66.3	167	381.7	700.4	820.6	110.4	62.2	243.2	4.4	0.00131	0.00575508		582.4	305.6	33.6	212.5	508.6	637.8	498.1	121.6	44.5	249.8	4	3e-05	0.00147694		0.893144	4.2		gb:AB110604.1 DB_XREF=gi:40645467 GEN=OsXRT5 TID=Os.12288.1 CNT=56 FEA=FLmRNA TIER=FL STK=1 UG=Os.12288 DEF=Oryza sativa (japonica cultivar-group) OsXRT5 mRNA for xyloglucan endotransglycosylase-related protein 5, complete cds. PROD=xyloglucan e	LOC_Os08g13920		unspliced-genomic xyloglucan endotransglycosylase/hydrolase protein 8 precursor, putative, expressed		AT5G57550	3e-75	247866_at
Os.9880.1.S1_a_at	30227.2	32108.3	23456.4	6496.1	6690.2	11132.3	25684.5	34175.9	26011	10068.5	11.6	1e-05	0.000966801		40258.4	34108.8	31543.3	8957.5	7873.7	11252.3	28386.2	32944.1	28196.1	12078.7	11.6	0.0006	0.00139342		0.960819	11.6		gb:AF022741.1 DB_XREF=gi:2570516 TID=Os.9880.1 CNT=36 FEA=FLmRNA TIER=FL STK=1 UG=Os.9880 DEF=Oryza sativa thioredoxin F isoform mRNA, complete cds. PROD=thioredoxin F isoform FL=gb:AF022741.1 REP_ORG=O. sativa	LOC_Os01g68490		unspliced-genomic tetratricopeptide-like helical, putative, expressed		AT3G29230	8e-88	257744_at
Os.11353.1.S1_at	1360	1538.6	2179.2	3197.8	3260.8	2491.6	1445.4	1897.6	2037.6	2938.6	22.4	8e-05	0.00178878		1086.9	1589.9	2034.2	3102.4	2831	2309.4	1285.6	2067.4	2039	3170.7	21.6	0.0011	0.00373371		0.960564	22		gb:AY187620.1 DB_XREF=gi:27948555 GEN=IAR TID=Os.11353.1 CNT=48 FEA=FLmRNA TIER=FL STK=1 UG=Os.11353 DEF=Oryza sativa (indica cultivar-group) IAA-amino acid hydrolase (IAR) mRNA, complete cds. PROD=IAA-amino acid hydrolase FL=gb:AY187620.1 gb:A	LOC_Os01g37960		unspliced-genomic IAA-amino acid hydrolase ILR1-like 4 precursor, putative, expressed		AT1G51760	6e-152	256178_s_at
Os.3397.1.S1_at	13213.2	8312.6	2829	2492.6	4860.2	12034.3	19527.7	6491.6	2702.5	2863.4	6.8	0.00124	0.00762547		13631.8	8221.9	2470.7	3526.5	5124	11281.7	16233.4	6676.2	2917.7	2944.3	6.4	0.00019	0.00445568		0.987996	6.6		gb:AB001885.1 DB_XREF=gi:3618313 TID=Os.3397.1 CNT=28 FEA=FLmRNA TIER=FL STK=1 UG=Os.3397 DEF=Oryza sativa (japonica cultivar-group) mRNA for zinc finger protein, complete cds, clone:R1577. PROD=zinc finger protein FL=gb:AK061044.1 gb:AB001885.1	LOC_Os02g39360	Orphans	unspliced-genomic salt tolerance-like protein, putative, expressed		AT1G06040	6e-40	260956_at
Os.9221.1.S1_at	9628.1	8825.4	7330.7	4125.4	4543.5	4902.1	6943.2	9732.8	8200	3944	11.2	0.00102	0.00236024		11255.3	8556.4	8208.3	4346.8	5108.9	5018.3	8168.9	10035.6	7712.1	3991.7	10.8	0.003	0.00934729		0.96576	11		gb:U65958.1 DB_XREF=gi:1519252 TID=Os.9221.1 CNT=37 FEA=FLmRNA TIER=FL STK=1 UG=Os.9221 DEF=Oryza sativa GF14-d protein mRNA, complete cds. PROD=GF14-d protein FL=gb:U65958.1 gb:AK101580.1 gb:AK070548.1 REP_ORG=O. sativa	LOC_Os11g34450		unspliced-genomic 14-3-3-like protein, putative, expressed		AT3G02520	6e-105	258489_at
Os.9338.1.S1_at	11140.3	14896.6	9790.4	4545.4	5229	6387.4	6090.6	14470.8	11986	4335.6	12	0.00684	0.0117173		11902	15150.4	10911.2	5401	5236.6	8514	6686.4	13197.9	13702.3	4655.2	12	0.01239	0.0141975		0.9731	12		gb:AF192467.1 DB_XREF=gi:6581057 GEN=Sgt1 TID=Os.9338.1 CNT=34 FEA=FLmRNA TIER=FL STK=1 UG=Os.9338 DEF=Oryza sativa Sgt1 (Sgt1) mRNA, complete cds. PROD=Sgt1 FL=gb:AF192467.1 gb:AK059268.1 REP_ORG=O. sativa	LOC_Os01g43540		unspliced-genomic suppressor of G2 allele of SKP1, putative, expressed		AT4G11260	3e-113	254918_at
Os.7903.1.S1_at	1842.6	1787.2	2165.3	3771.2	2938.4	2179.3	1822.8	2031.3	2377.8	2738	21.6	0.00556	0.0134035		1218.2	1410.3	1832	3613.2	2402.7	2167.1	1638.4	1704.3	2283.4	2731.2	21.6	0.00541	0.0124156		0.957281	21.6		gb:U92540.1 DB_XREF=gi:1930069 TID=Os.7903.1 CNT=38 FEA=FLmRNA TIER=FL STK=1 UG=Os.7903 DEF=Oryza sativa proteasome alpha subunit mRNA, complete cds. PROD=proteasome alpha subunit FL=gb:AK098875.1 gb:AK061808.1 gb:U92540.1 REP_ORG=O. sativa	LOC_Os08g43540		unspliced-genomic proteasome subunit alpha type 7, putative, expressed		AT5G66140	6e-114	247080_at
Os.8788.1.S1_at	3539.9	2938.8	3142	3767.7	4136.1	3990.9	3796.7	3041.9	2984	4683.9	0.8	0.01314	0.024747		4316.1	3288.9	3261.8	4098.1	4503.9	4398.9	4298.1	3617.8	3861	4870.7	1.6	0.02909	0.00322032		0.910301	1.2		gb:AY332469.1 DB_XREF=gi:33242902 GEN=GLN TID=Os.8788.1 CNT=36 FEA=FLmRNA TIER=FL STK=1 UG=Os.8788 DEF=Oryza sativa (japonica cultivar-group) GS1-like protein (GLN) mRNA, complete cds. PROD=GS1-like protein FL=gb:AK062574.1 gb:AY332469.1 gb:AK0	LOC_Os10g32730		unspliced-genomic haloacid dehalogenase-like hydrolase domain-containing protein 1A, putative, expressed		AT4G21470	6e-156	254417_at
Os.10423.1.S1_at	4037.3	2390.4	1140.8	1465.4	2071.3	2710.5	4320.1	1396.5	1199.9	1611.7	6	0.00659	0.0185518		3586.9	1671.6	646.1	1495.1	1854.8	1937.5	3366.3	1437.6	1060.2	1295.8	6	0.0145	0.0248192		0.965086	6		gb:AB074972.1 DB_XREF=gi:17221606 GEN=OsEIL2 TID=Os.10423.1 CNT=30 FEA=FLmRNA TIER=FL STK=1 UG=Os.10423 DEF=Oryza sativa (japonica cultivar-group) OsEIL2 mRNA for ethylene-insensitive-3-like protein, complete cds. PROD=ethylene-insensitive-3-lik	LOC_Os07g48630	EIL	unspliced-genomic ETHYLENE-INSENSITIVE3-like 1 protein, putative, expressed		AT2G27050	3e-115	266302_at
Os.10423.1.S1_s_at	4998.2	2837.5	1303.8	1701.6	2741.2	3420.3	5764.6	2149.4	1391.2	1867.5	6	0.00312	0.0131622		4375.1	2161	1069.4	2005	2229.5	2801.2	4865.6	2079.2	1445.8	1830.6	6	0.01095	0.0200832		0.98304	6		gb:AB074972.1 DB_XREF=gi:17221606 GEN=OsEIL2 TID=Os.10423.1 CNT=30 FEA=FLmRNA TIER=FL STK=1 UG=Os.10423 DEF=Oryza sativa (japonica cultivar-group) OsEIL2 mRNA for ethylene-insensitive-3-like protein, complete cds. PROD=ethylene-insensitive-3-lik	LOC_Os07g48630	EIL	unspliced-genomic ETHYLENE-INSENSITIVE3-like 1 protein, putative, expressed		AT2G27050	3e-115	266302_at
Os.5499.3.S1_a_at	4014	3716.5	3503.2	3060.5	2522.8	2962.9	2836.5	5671.7	4409.1	3569.9	13.2	0.07473	0.0259684		2847.3	5024.1	3870.5	3568.4	2744.7	2717.9	2382.8	6781.1	4184.2	2770.9	13.6	0.07114	0.033904		0.828105	13.4		gb:AK059815.1 DB_XREF=gi:32969833 TID=Os.5499.3 CNT=5 FEA=FLmRNA TIER=FL STK=1 UG=Os.5499 UG_TITLE=(japonica cultivar-group) mRNA for mitochondrial ribosomal protein S14, complete cds DEF=Oryza sativa (japonica cultivar-group) cDNA clone:006-205-	LOC_Os08g02640		unspliced-genomic succinate dehydrogenase iron-sulfur protein,mitochondrial precursor, putative, expressed		AT5G40650	1e-81	249343_at
Os.5499.4.S1_x_at	3620.7	4165.9	3630.6	3171.8	2550.7	2758.5	2449.6	5977.8	4490.7	3424.8	13.6	0.04698	0.0296177		2564.6	4533	3806.2	3432	2591.3	2648.9	2054.5	6576.5	4422.3	2860.6	14	0.07004	0.0336299		0.945971	13.8		gb:AK104304.1 DB_XREF=gi:32989513 TID=Os.5499.4 CNT=1 FEA=FLmRNA TIER=FL STK=1 UG=Os.5499 UG_TITLE=(japonica cultivar-group) mRNA for mitochondrial ribosomal protein S14, complete cds DEF=Oryza sativa (japonica cultivar-group) cDNA clone:001-012-	LOC_Os08g02640		unspliced-genomic succinate dehydrogenase iron-sulfur protein,mitochondrial precursor, putative, expressed		AT5G40650	1e-81	249343_at
Os.6452.2.A1_a_at	7524.2	9903	8188.6	5834	5467.5	5542.2	7425.2	13371.2	9506	5921.7	12.8	0.00748	0.0105295		6525.8	11520	9794	6188	5149.3	3944.8	7581.3	12093.2	10659.2	6280.7	13.6	0.00019	0.00172322		0.914344	13.2		gb:BI305303 DB_XREF=gi:14980625 DB_XREF=NRS2R_1_K21 CLONE=NRS2R_1_K21 TID=Os.6452.2 CNT=8 FEA=EST TIER=Stack STK=8 UG=Os.6452 UG_TITLE=(japonica cultivar-group) putative cytochrome P450 (P0006C01.25), mRNA REP_ORG=O. sativa	LOC_Os01g43710		unspliced-genomic cytochrome P450 72A1, putative, expressed		AT3G14690	4e-166	258094_at
Os.6452.1.S1_at	87.1	94.5	110.1	45.8	34.6	64.4	66.7	86.5	72.9	42	12	0.01161	0.0122073		67.4	160.2	91.6	23.9	57.5	39.6	77.1	114.2	88.6	40	12	0.0175	0.0199382		0.707726	12		gb:AK105255.1 DB_XREF=gi:32990464 TID=Os.6452.1 CNT=41 FEA=FLmRNA TIER=FL STK=1 UG=Os.6452 UG_TITLE=(japonica cultivar-group) putative cytochrome P450 (P0006C01.25), mRNA DEF=Oryza sativa (japonica cultivar-group) cDNA clone:001-114-F02, full ins	LOC_Os01g43710		unspliced-genomic cytochrome P450 72A1, putative, expressed		AT3G14690	4e-166	258094_at
Os.3408.1.A2_a_at	20115.8	18629.2	6587.1	10228.9	22692.5	22474.6	24444.9	16257.5	6688.1	12868.5	4.8	0.00142	0.0070315		29787	21663.9	8860.3	17769.2	28219.5	25538.5	31269.1	21004.7	7183.2	19064.9	4.8	0.00371	0.0107679		0.952381	4.8		gb:AB007193.1 DB_XREF=gi:3041774 TID=Os.3408.1 CNT=37 FEA=FLmRNA TIER=FL STK=1 UG=Os.3408 DEF=Oryza sativa mRNA for fructose-1,6-bisphosphatase (cytosolic isoform), complete cds. PROD=fructose-1,6-bisphosphatase FL=gb:AK119536.1 gb:AB007193.1 gb	LOC_Os01g64670		unspliced-genomic soluble inorganic pyrophosphatase, putative, expressed		AT1G01050	1e-97	261579_at
Os.3408.1.A1_x_at	6061.1	4523	1645.4	2437.2	10302.6	8217.5	10218.5	4835.3	1528.6	3756.2	4	0.00453	0.00689965		9191.5	6708.3	2195.1	5459.1	12692.7	11186.4	13229.9	8218.3	2188.8	6190.4	4.4	0.00244	0.00484978		0.977044	4.2		gb:BU667041 DB_XREF=gi:23380596 DB_XREF=M004f05 CLONE=M004f05 TID=Os.3408.1 CNT=37 FEA=FLmRNA TIER=Stack STK=11 UG=Os.3408 UG_TITLE=(japonica cultivar-group) P0505D12.23 (P0505D12.23), mRNA FL=gb:AK119536.1 gb:AB007193.1 gb:AK070516.1 REP_ORG=	LOC_Os01g64670		unspliced-genomic soluble inorganic pyrophosphatase, putative, expressed		AT1G01050	1e-97	261579_at
Os.9212.1.S1_at	13198.7	21430.7	4190.4	185.2	159.3	377.2	5834.8	22760.3	5678.3	1004.2	11.6	0.01106	0.016105		20230.6	28668.7	9222.3	534.2	144.6	685.5	6677.8	26754.5	6430.3	309.1	11.2	0.00835	0.00991773		0.984763	11.4		gb:AY069940.1 DB_XREF=gi:18139610 TID=Os.9212.1 CNT=30 FEA=FLmRNA TIER=FL STK=1 UG=Os.9212 DEF=Oryza sativa granule binding starch synthase II precursor, mRNA, complete cds. PROD=granule binding starch synthase II precursor FL=gb:AY069940.1 gb:A	LOC_Os07g22930		unspliced-genomic granule-bound starch synthase 1b, chloroplast precursor, putative, expressed		AT1G32900	0	261191_at
Os.3350.1.S1_a_at	492.7	454.7	194.6	330.6	662	1150.5	634.8	298.4	381.6	562.5	3.2	0.01088	0.00984773		172.8	377.3	420.7	816.3	863.4	1341.4	943.1	382.9	424.7	329.8	2.4	0.09258	0.0476334		0.736779	2.8		gb:AK102488.1 DB_XREF=gi:32987697 TID=Os.3350.1 CNT=41 FEA=FLmRNA TIER=FL STK=1 UG=Os.3350 UG_TITLE=(japonica cultivar-group) putative alanine aminotransferase (OSJNBb0061I18.10), mRNA DEF=Oryza sativa (japonica cultivar-group) cDNA clone:J033094	LOC_Os10g25130		unspliced-genomic alanine aminotransferase 2, putative, expressed		AT1G17290	0	260847_s_at
Os.3350.1.S1_at	354.9	200.6	223.7	283.4	337.7	585.8	383.5	244.2	339.9	412.6	2.8	0.05484	0.014108		262.2	300.6	252.4	492.7	419.5	844.8	605.6	315.8	265.4	256.4	3.2	0.07431	0.040731		0.706658	3		gb:AK102488.1 DB_XREF=gi:32987697 TID=Os.3350.1 CNT=41 FEA=FLmRNA TIER=FL STK=1 UG=Os.3350 UG_TITLE=(japonica cultivar-group) putative alanine aminotransferase (OSJNBb0061I18.10), mRNA DEF=Oryza sativa (japonica cultivar-group) cDNA clone:J033094	LOC_Os10g25130		unspliced-genomic alanine aminotransferase 2, putative, expressed		AT1G17290	0	260847_s_at
Os.3350.1.S2_a_at	1008.5	463	636.3	1011.1	875.5	1210.6	853.5	592.6	642.9	838.3	2	0.01183	0.0173593		542.1	545.6	459.5	832.1	861	1367.7	1158.3	639.9	694.7	421.5	3.6	0.08186	0.0387647		0.616167	2.8		gb:AB007405.1 DB_XREF=gi:4730885 TID=Os.3350.1 CNT=41 FEA=FLmRNA TIER=FL STK=1 UG=Os.3350 DEF=Oryza sativa mRNA for alanine aminotransferase, complete cds. PROD=alanine aminotransferase FL=gb:AK102488.1 gb:AB007405.1 REP_ORG=O. sativa	LOC_Os10g25130		unspliced-genomic alanine aminotransferase 2, putative, expressed		AT1G17290	0	260847_s_at
Os.2678.1.S1_at	405	222.2	537.5	518.9	852.4	1018.6	818.2	158.3	295	472.8	2	0.01147	0.00651133		303.1	98.4	142.7	501.3	383.8	726.3	468.9	193.4	251.4	279.7	2.4	0.02185	0.010467		0.808063	2.2		gb:D17443.1 DB_XREF=gi:440868 GEN=YK347 TID=Os.2678.1 CNT=31 FEA=FLmRNA TIER=FL STK=1 UG=Os.2678 DEF=Rice mRNA for major intrinsic protein, complete cds. PROD=major intrinsic protein FL=gb:D17443.1 gb:AK068806.1 REP_ORG=O. sativa	LOC_Os02g13870		unspliced-genomic aquaporin NIP1.2, putative, expressed		AT4G18910	6e-85	254608_at
Os.12182.1.S1_at	3311.4	2901.1	3731.1	4042.7	3730.8	3240.6	3351.1	3803.2	3925	4136.9	19.6	0.02714	0.0352269		2476	2713.4	3445.8	4492.1	3185.6	2782.9	2986.9	3206.3	3351.4	3960	19.6	0.00946	0.0189706		0.834251	19.6		gb:AB026564.1 DB_XREF=gi:8671503 GEN=OsPBB1 TID=Os.12182.1 CNT=29 FEA=FLmRNA TIER=FL STK=1 UG=Os.12182 DEF=Oryza sativa (japonica cultivar-group) OsPBB1 mRNA for beta 2 subunit of 20S proteasome, complete cds. PROD=beta 2 subunit of 20S proteaso	LOC_Os05g09490		unspliced-genomic proteasome subunit beta type 7-A precursor, putative, expressed		AT3G27430	7e-129	257711_at
Os.2361.1.S1_at	1105	1446.1	1654.5	1798	1583.6	1443.9	1294.3	1707.1	1544.7	1799.7	19.2	0.01358	0.0198565		1485.3	2001.3	1878.4	1737	1567.9	1536.2	1391.6	1756.4	1742.6	1713.9	15.6	0.02909	0.0167323		0.520688	17.4		gb:AF106844.1 DB_XREF=gi:10443484 GEN=rCOP11 TID=Os.2361.1 CNT=26 FEA=FLmRNA TIER=FL STK=1 UG=Os.2361 DEF=Oryza sativa rCOP11 protein (rCOP11) mRNA, complete cds. PROD=rCOP11 protein FL=gb:AF106844.1 gb:AK101870.1 REP_ORG=O. sativa	LOC_Os03g02540		unspliced-genomic COP9 signalosome complex subunit 1, putative, expressed		AT3G61140	4e-163	251311_at
Os.12164.1.S1_at	15287.9	12566.9	9885.9	9365.6	12261.8	13868.9	18548.9	10196.7	8740.6	8659.8	6	0.00266	0.0114026		20205.1	10298.5	7605.1	8163.5	11487.2	12940.2	17061.7	9475.3	7363	8531.5	6	0.00493	0.0255738		0.888197	6		gb:AK063856.1 DB_XREF=gi:32973874 TID=Os.12164.1 CNT=26 FEA=FLmRNA TIER=FL STK=1 UG=Os.12164 UG_TITLE=(japonica cultivar-group) putative SERINETHREONINE PROTEIN PHOSPHATASE PP1 (OJ1364E02.17), mRNA DEF=Oryza sativa (japonica cultivar-group) cDNA	LOC_Os03g16110		unspliced-genomic serine/threonine-protein phosphatase PP1, putative, expressed		AT2G39840	1e-168	245066_at
Os.11658.1.S1_at	509.8	382	418.3	431.1	531.8	584.1	537.8	399.8	327	360.3	4	0.00098	0.00115733		502.8	417.3	473.4	345	644.3	819.2	620	370.3	379.8	346.4	4	0.01241	0.0113523		0.893112	4		gb:AK064051.1 DB_XREF=gi:32974069 TID=Os.11658.1 CNT=37 FEA=FLmRNA TIER=FL STK=1 UG=Os.11658 UG_TITLE=(japonica cultivar-group) mRNA for hypothetical protein, complete cds, contig of clone: OsNMCP1aSE2Nco-5 and 12FPG031 DEF=Oryza sativa (japonica	LOC_Os02g48010		unspliced-genomic nuclear matrix constituent protein 1, putative, expressed		AT1G67230	5e-134	264996_at
Os.11658.1.S2_at	5094.3	4949.2	4609.3	5095.9	5882.4	7558.9	5829.7	5172.7	5023.2	4961.1	3.2	0.02073	0.0102237		6749.6	5164.1	5237	4199.7	5813.1	6867.1	6980	4706.2	4196.1	5120.1	5.2	0.00239	0.00893005		0.612988	4.2		gb:AB110204.1 DB_XREF=gi:32352205 TID=Os.11658.1 CNT=37 FEA=FLmRNA TIER=FL STK=1 UG=Os.11658 UG_TITLE=(japonica cultivar-group) mRNA for hypothetical protein, complete cds, contig of clone: OsNMCP1aSE2Nco-5 and 12FPG031 DEF=Oryza sativa (japonica	LOC_Os02g48010		unspliced-genomic nuclear matrix constituent protein 1, putative, expressed		AT1G67230	5e-134	264996_at
Os.3393.1.S1_at	2215.6	1380.2	1263.3	945.6	1494	1405.8	1838.5	2086.2	1607.2	1317.8	8.8	0.05276	0.0226013		2502.7	2156.5	1505.9	1543.9	1744.7	1868.5	2542.5	2513.2	1601.2	1439.6	8.4	0.00113	0.00327697		0.826029	8.6		gb:AK069613.1 DB_XREF=gi:32979637 TID=Os.3393.1 CNT=33 FEA=FLmRNA TIER=FL STK=1 UG=Os.3393 UG_TITLE=MRNA for OSK1, complete cds DEF=Oryza sativa (japonica cultivar-group) cDNA clone:J023019A07, full insert sequence. FL=gb:D82039.1 gb:AK067158.1	LOC_Os05g45420		unspliced-genomic SNF1-related protein kinase catalytic alpha subunit KIN10, putative, expressed		AT3G01090	0	259319_at
Os.3393.1.S2_at	4606.1	4387	2964.4	2995.9	3081.7	3362.5	4636.2	4553.3	3256.7	2841.9	9.2	0.00056	0.00353728		5512	5119	3073	2540	3273.3	3554.9	4876.9	4555.5	2989.9	2634.1	8.8	0.00043	0.00280137		0.957546	9		gb:AF062479.1 DB_XREF=gi:4091884 GEN=Snf1 TID=Os.3393.1 CNT=33 FEA=FLmRNA TIER=FL STK=1 UG=Os.3393 DEF=Oryza sativa protein kinase SNF1 (Snf1) mRNA, complete cds. PROD=protein kinase SNF1 FL=gb:D82039.1 gb:AK067158.1 gb:AF062479.1 gb:AK069613.1	LOC_Os05g45420		unspliced-genomic SNF1-related protein kinase catalytic alpha subunit KIN10, putative, expressed		AT3G01090	0	259319_at
Os.5406.1.S1_at	669.6	253.9	425.5	610.8	757.7	513.7	553.3	236.4	490.4	1037.3	23.6	0.06364	0.0314145		412.3	422.7	455.6	1106.4	693.7	502.2	411	228.2	321.8	790.7	22.4	0.02262	0.0142884		0.597037	23		gb:AY332470.1 DB_XREF=gi:33242904 GEN=GDH TID=Os.5406.1 CNT=27 FEA=FLmRNA TIER=FL STK=1 UG=Os.5406 DEF=Oryza sativa (japonica cultivar-group) glutamate dehydrogenase (GDH) mRNA, complete cds. PROD=glutamate dehydrogenase FL=gb:AY332470.1 gb:AK0	LOC_Os03g58040		unspliced-genomic glutamate dehydrogenase, putative, expressed		AT5G18170	0	250032_at
Os.15285.1.S1_a_at	4126.4	2299.1	2087.1	2799.3	3263	3370.8	3317.9	2116.4	2336.9	3055	3.6	0.01812	0.0230742		4200.5	1819.7	2329.1	3298.7	3431.1	3608.6	3805.2	2531.4	2528.5	2664	3.6	0.02581	0.0249805		0.89526	3.6		gb:AY336990.1 DB_XREF=gi:33243051 TID=Os.15285.1 CNT=24 FEA=FLmRNA TIER=FL STK=1 UG=Os.15285 DEF=Oryza sativa (japonica cultivar-group) CUL1 mRNA, complete cds. PROD=CUL1 FL=gb:AK104340.1 gb:AY336990.1 gb:AK064940.1 REP_ORG=O. sativa	LOC_Os01g27150		unspliced-genomic cullin-1, putative, expressed		AT4G02570	0	255441_at
Os.4378.2.S2_a_at	5630	5471	6187.2	5733.7	4798.3	4808.1	4689.8	5470	6165.2	5111.1	15.2	0.0247	0.0133128		5534.4	5342.3	5362	4411.1	4034.7	3856.3	4288.8	5305.7	5573	4678.3	13.6	0.00763	0.00184969		0.793385	14.4		gb:AK100133.1 DB_XREF=gi:32985342 TID=Os.4378.2 CNT=96 FEA=FLmRNA TIER=FL STK=1 UG=Os.4378 UG_TITLE=(japonica cultivar-group) B1156H12.22 (B1156H12.22), mRNA DEF=Oryza sativa (japonica cultivar-group) cDNA clone:J023010D07, full insert sequence.	LOC_Os05g06350		unspliced-genomic importin alpha-1b subunit, putative, expressed		AT3G06720	0	258531_at
Os.2691.1.S1_a_at	2311.3	1141.7	1090.1	1241.1	1119.5	1590.7	1720.6	961.5	908.3	1390.8	5.2	0.08927	0.0468629		1852.5	885.6	899.5	946.2	1161.6	1060.3	1458.2	835.3	690.3	928.9	5.2	0.06509	0.0487919		0.922094	5.2		gb:AF048691.1 DB_XREF=gi:2944384 GEN=CDPK12 TID=Os.2691.1 CNT=24 FEA=FLmRNA TIER=FL STK=1 UG=Os.2691 DEF=Oryza sativa calcium dependent protein kinase (CDPK12) mRNA, complete cds. PROD=calcium dependent protein kinase FL=gb:AF048691.1 gb:AK0665	LOC_Os03g03660		unspliced-genomic calcium-dependent protein kinase, isoform 1, putative, expressed		AT2G17290	0	264851_at
Os.16444.1.S1_at	222.9	164.4	286.6	526.9	721.3	775.4	320.2	193.9	247.3	363.8	1.2	0.00149	0.00155667		358.4	235.7	272.4	656.8	989.1	1109.3	459.8	279.4	287.1	544.5	1.6	0.00027	0.00150012		0.98338	1.4		gb:AY581257.1 DB_XREF=gi:46371871 GEN=HPt1 TID=Os.16444.1 CNT=17 FEA=FLmRNA TIER=FL STK=1 UG=Os.16444 DEF=Oryza sativa (japonica cultivar-group) histidine-containing phosphotransfer protein (HPt1) mRNA, complete cds. PROD=histidine-containing ph	LOC_Os08g44350		unspliced-genomic histidine-containing phosphotransfer protein 5, putative, expressed		AT3G21510	1e-27	258184_at
Os.16444.1.S1_s_at	889.9	677.6	984.5	2494	3508.9	3625	1342.7	785.5	905	1721.1	1.2	0.00074	0.00152373		1060.7	725.2	805.1	2237.9	4022	3745.5	1662.6	748.9	917.9	2579.9	1.2	5e-05	0.00101532		0.966057	1.2		gb:AY581257.1 DB_XREF=gi:46371871 GEN=HPt1 TID=Os.16444.1 CNT=17 FEA=FLmRNA TIER=FL STK=1 UG=Os.16444 DEF=Oryza sativa (japonica cultivar-group) histidine-containing phosphotransfer protein (HPt1) mRNA, complete cds. PROD=histidine-containing ph	LOC_Os08g44350		unspliced-genomic histidine-containing phosphotransfer protein 5, putative, expressed		AT3G21510	1e-27	258184_at
Os.2313.1.S1_at	818.5	1391.1	3714.3	3768.8	2339.5	1795.5	798	1703.4	3859.5	4106.9	19.2	7e-05	0.00256597		380.3	1095.7	3444	3804.6	1978.7	1755.1	485.6	1699.8	3682.4	3764.6	19.2	0.00018	0.00372845		0.99304	19.2		gb:AF150113.1 DB_XREF=gi:5107213 GEN=TIM9 TID=Os.2313.1 CNT=15 FEA=FLmRNA TIER=FL STK=1 UG=Os.2313 DEF=Oryza sativa small zinc finger-like protein (TIM9) mRNA, complete cds. PROD=small zinc finger-like protein FL=gb:AK120784.1 gb:AF150113.1 RE	LOC_Os12g38310		unspliced-genomic mitochondrial import inner membrane translocase subunit Tim9, putative, expressed		AT3G46560	1e-38	252479_at
Os.2217.1.S1_a_at	7358.9	7099.1	7857.8	5951.6	6126.5	4410.9	6342.7	9258.8	8121.7	6020.9	13.6	0.01462	0.0168828		8219.6	7552.4	9059	7475.5	6428.8	5522.2	7562.7	9261.3	10336.2	8276.2	14.8	0.00948	0.00781841		0.852598	14.2		gb:AF068332.1 DB_XREF=gi:3201968 TID=Os.2217.1 CNT=23 FEA=FLmRNA TIER=FL STK=1 UG=Os.2217 DEF=Oryza sativa submergence induced protein 2A mRNA, complete cds. PROD=submergence induced protein 2A FL=gb:AK099497.1 gb:AK061653.1 gb:AF068332.1 REP_O	LOC_Os03g06620		unspliced-genomic 1,2-dihydroxy-3-keto-5-methylthiopentene dioxygenase 2, putative, expressed		AT4G14710	7e-94	245373_s_at
Os.11384.1.S1_at	4415.3	2607.2	2266.3	3418.2	3728.2	4116.7	4363	3314	2253.7	2925.3	4.4	0.00201	0.0067117		4423.3	2572.5	2005.3	2749	3323.4	3794.4	4075.9	2695.8	1873.5	2581.1	4.8	0.00051	0.0053752		0.96876	4.6		gb:AY168645.1 DB_XREF=gi:37359392 TID=Os.11384.1 CNT=22 FEA=FLmRNA TIER=FL STK=1 UG=Os.11384 DEF=Oryza sativa (japonica cultivar-group) COI1 mRNA, complete cds. PROD=COI1 FL=gb:AY168645.1 gb:AK121543.1 REP_ORG=O. sativa	LOC_Os01g63420		unspliced-genomic coronatine-insensitive protein 1, putative, expressed		AT2G39940	0	267346_at
Os.37813.1.S1_at	3026.2	2634.3	3167.6	4372.8	3499.6	3513.6	3411.3	2706.9	3047.4	3619.2	23.2	0.02791	0.0221354		2893	1850.2	3156.1	4358.2	3939.8	4366.4	3385.9	2413.5	3510	3932.7	0	0.00612	0.00920543		0.870888	23.6		gb:AY551919.1 DB_XREF=gi:45385959 TID=Os.37813.1 CNT=21 FEA=FLmRNA TIER=FL STK=1 UG=Os.37813 DEF=Oryza sativa (japonica cultivar-group) MADS-box protein RMADS214 mRNA, complete cds. PROD=MADS-box protein RMADS214 FL=gb:AF141965.1 gb:AY551919.1 g	LOC_Os10g39130	MADS	unspliced-genomic MADS-box transcription factor 56, putative, expressed		AT4G11880	6e-46	254896_at
Os.4602.2.S1_a_at	1762	1333.7	1360	2435.5	3343.1	4606	3047.5	1083.8	1282.5	1759.8	2.4	0.00236	0.00229858		2025.6	664.6	1536.5	2199.7	3355	4512.7	3284.3	768.4	1254.3	2004.3	2.4	0.00149	0.00255823		0.970667	2.4		gb:AK071376.1 DB_XREF=gi:32981399 TID=Os.4602.2 CNT=10 FEA=FLmRNA TIER=FL STK=1 UG=Os.4602 UG_TITLE=MRNA for MAPK4 protein (mapk4 gene) DEF=Oryza sativa (japonica cultivar-group) cDNA clone:J023093O04, full insert sequence. FL=gb:AK071376.1 REP	LOC_Os06g48590		unspliced-genomic OsMPK7 - putative MAPK based on amino acid sequence homology, expressed		AT1G10210	5e-179	264405_at
Os.4677.1.S1_a_at	6294.5	5920.3	4573.8	4607.5	5596.3	5477.7	6692	6231.3	5820.7	4908.6	8.4	0.01386	0.00443518		6035.5	5881.1	4927.7	4605.8	4829.5	4703.4	5238.9	5572.4	5393.6	4767.7	10.8	0.01266	0.00266308		0.704778	9.6		gb:AB010740.1 DB_XREF=gi:3550984 TID=Os.4677.1 CNT=23 FEA=FLmRNA TIER=FL STK=1 UG=Os.4677 DEF=Oryza sativa (japonica cultivar-group) mRNA for OsS5a, complete cds. PROD=OsS5a FL=gb:AB010740.1 gb:AB037151.1 REP_ORG=O. sativa	LOC_Os03g13970		unspliced-genomic 26S proteasome non-ATPase regulatory subunit 4, putative, expressed		AT4G38630	7e-91	252955_at
Os.1377.1.S1_at	2690.4	3465.3	3734.1	5092.7	6525.3	8518.7	4912.4	3543.5	3908.6	4534.4	1.6	0.0241	0.00658576		2462.5	3506.2	4064.4	4368	6080.6	8447.6	4599.8	3394	3819.8	4532.1	1.6	0.05701	0.0164329		0.985975	1.6		gb:AF013979.1 DB_XREF=gi:2281704 GEN=OSERS TID=Os.1377.1 CNT=20 FEA=FLmRNA TIER=FL STK=1 UG=Os.1377 DEF=Oryza sativa ethylene responsive factor (OSERS) mRNA, complete cds. PROD=ethylene responsive factor FL=gb:AF013979.1 gb:AK065161.1 gb:AK0678	LOC_Os03g49500		unspliced-genomic ethylene receptor, putative, expressed		AT1G66340	0	260133_at
Os.4665.1.S1_at	4098.1	2193.1	5552.4	6000.7	6282.4	5593.7	3768.3	3053.4	5349.5	8272.8	22.4	0.00327	0.0221128		2165.4	2513.5	5406.2	8099.5	6584.3	5473.1	3704	2246.3	4828.8	8891.7	22	0.00017	0.00196298		0.917547	22.2		gb:AK069075.1 DB_XREF=gi:32979099 TID=Os.4665.1 CNT=18 FEA=FLmRNA TIER=FL STK=1 UG=Os.4665 UG_TITLE=(japonica cultivar-group) cDNA clone:J023007K10, full insert sequence DEF=Oryza sativa (japonica cultivar-group) cDNA clone:J023007K10, full inser	LOC_Os03g18810		unspliced-genomic transaminase/ transferase, transferring nitrogenous groups, putative, expressed		AT4G33680	0	253308_at
Os.419.1.S1_at	3217	2919.6	3085.3	4303.8	4205.3	5725.5	4491.2	3555.9	3291.1	4228.6	2	0.02688	0.00657014		3485.4	2940.7	3259.1	3491.1	4212.7	4644.5	3892.9	2896.7	2917.1	3659.4	2.4	0.00023	0.00176512		0.867478	2.2		gb:AB037144.1 DB_XREF=gi:12082086 GEN=OsUV-DDB TID=Os.419.1 CNT=13 FEA=FLmRNA TIER=FL STK=1 UG=Os.419 DEF=Oryza sativa (japonica cultivar-group) OsUV-DDB mRNA for UV-damaged DNA binding protein, complete cds. PROD=UV-damaged DNA binding protein	LOC_Os05g51480		unspliced-genomic DNA damage binding protein 1a, putative, expressed		AT4G05420	0	255226_at
Os.2622.1.S1_at	2546.3	2032.9	2260.4	2650.8	3134.5	3257.2	2529.9	2005.7	2149.9	1970	2.4	0.00565	0.00220244		3029.1	2490.6	2387.8	2387.5	3170.7	3725.4	3809.4	2029.9	2704.7	2353.5	4	0.01574	0.0162214		0.722973	3.2		gb:AY167575.1 DB_XREF=gi:32394964 GEN=EDR1 TID=Os.2622.1 CNT=27 FEA=FLmRNA TIER=FL STK=1 UG=Os.2622 DEF=Oryza sativa (japonica cultivar-group) EDR1 (EDR1) mRNA, complete cds. PROD=EDR1 FL=gb:AY167575.1 gb:AK111595.1 REP_ORG=O. sativa	LOC_Os03g06410		unspliced-genomic EDR1, putative, expressed		AT1G08720	0	264780_at
Os.137.1.S1_at	2830.7	6492	10256.1	10751.1	7093.6	4612.6	3198.4	7089.4	15170.1	12724.3	18	0.00072	0.00334556		2643.4	6492	13317.7	10845.4	5853	3964.2	3175.5	7370.5	12270.6	10389.8	17.6	4e-05	0.00303424		0.918452	17.8		gb:D17587.1 DB_XREF=gi:409581 GEN=cbp31 TID=Os.137.1 CNT=23 FEA=FLmRNA TIER=FL STK=1 UG=Os.137 DEF=Oryza sativa (japonica cultivar-group) mRNA for serine carboxypeptidase-like protein, complete cds. PROD=serine carboxypeptidase-like protein FL=	LOC_Os07g29620		unspliced-genomic serine carboxypeptidase-like precursor, putative, expressed		AT3G10410	0	258970_at
Os.9717.1.S1_at	3941.7	2627	3097.5	2973.7	4055.8	4883.3	3852.4	3067.3	2398.3	3497.9	3.2	0.00085	0.00397584		4529.4	2840.1	3235.2	3612.6	4496.2	4979.6	4394.8	3215	3103.5	3939.6	3.2	0.0002	0.00202511		0.95332	3.2		gb:AY344485.1 DB_XREF=gi:33591099 TID=Os.9717.1 CNT=18 FEA=FLmRNA TIER=FL STK=1 UG=Os.9717 DEF=Oryza sativa (japonica cultivar-group) heat shock factor RHSF3 mRNA, complete cds. PROD=heat shock factor RHSF3 FL=gb:AK106118.1 gb:AK100430.1 gb:AY34	LOC_Os03g63750	HSF	unspliced-genomic heat shock factor protein HSF8, putative, expressed		AT5G16820	1e-99	246450_at
Os.5892.1.S1_s_at	2362.8	2156.3	2186.4	3529.2	3763.2	3825.8	3187	2466.6	2714.9	3488.2	0.8	0.00179	0.00116791		1809.7	2313.5	2486.5	4060.4	4087.1	3949.5	3247.1	2558.7	2955.8	3534.5	23.6	0.00946	0.00158226		0.94325	0.2		gb:AB167396.1 DB_XREF=gi:45421831 GEN=UXS-2 TID=Os.5892.1 CNT=18 FEA=FLmRNA TIER=FL STK=1 UG=Os.5892 DEF=Oryza sativa (japonica cultivar-group) UXS-2 mRNA for UDP-glucuronic acid decarboxylase, complete cds. PROD=UDP-glucuronic acid decarboxylas	LOC_Os01g21320		unspliced-genomic UDP-glucuronic acid decarboxylase 1, putative, expressed		AT3G62830	4e-167	251234_s_at
Os.6433.1.S1_at	151.8	606.6	1334.6	600.1	249.3	272.5	58.1	786.7	1261.2	613.1	16	0.00348	0.00976772		136.8	787.2	1364.9	481.8	258.3	180.9	135.8	932	1242.4	673.6	15.6	0.00143	0.00519867		0.978491	15.8		gb:AF042333.1 DB_XREF=gi:3560532 TID=Os.6433.1 CNT=18 FEA=FLmRNA TIER=FL STK=1 UG=Os.6433 DEF=Oryza sativa 24-methylene lophenol C24(1)methyltransferase mRNA, complete cds. PROD=24-methylene lophenol C24(1)methyltransferase FL=gb:AK060887.1 gb:A	LOC_Os03g04340		unspliced-genomic 24-methylenesterol C-methyltransferase 2, putative, expressed		AT1G20330	6e-148	255885_at
Os.415.1.S1_at	1883.6	2242.1	2897.3	2937.7	3446.1	4113.4	2727.3	1791.2	2383.5	3309.8	0.4	0.01843	0.0125396		1498.1	2036	2219	3106	2935.2	4105	2370.7	1770.4	2523.8	2815	0.4	0.04729	0.0182615		0.921201	0.4		gb:U34598.1 DB_XREF=gi:1002916 TID=Os.415.1 CNT=16 FEA=FLmRNA TIER=FL STK=1 UG=Os.415 DEF=Oryza sativa cap-binding protein p28 mRNA, complete cds. PROD=p28 FL=gb:U34598.1 REP_ORG=O. sativa	LOC_Os10g32970		unspliced-genomic eukaryotic translation initiation factor 4E-2, putative, expressed		AT5G35620	3e-67	249712_at
Os.5302.1.S1_a_at	866.1	849.1	935.1	1372.1	1179.7	1082	1010.4	898.4	1101	1703.6	22	0.01838	0.0335655		1162.9	1391.3	1280.3	1792.1	1411.1	1127.7	1166.1	1216.5	1431.4	1985.4	20	0.02007	0.017292		0.88017	21		gb:D38232.1 DB_XREF=gi:540532 TID=Os.5302.1 CNT=15 FEA=FLmRNA TIER=FL STK=1 UG=Os.5302 DEF=Oryza sativa (japonica cultivar-group) mRNA for G protein alpha subunit, complete cds. PROD=G protein alpha subunit FL=gb:L28001.1 gb:D38232.1 REP_ORG=O.	LOC_Os05g26890		unspliced-genomic guanine nucleotide-binding protein alpha-1 subunit, putative, expressed		AT2G26300	2e-167	267375_at
Os.2242.1.S1_at	6877.9	3202.9	7945.8	7964.9	8370.4	5310.5	5338	3276.2	8350.2	13199.2	21.2	0.03775	0.0338772		4007.7	2834.9	4389.4	9973.1	7287.6	5250.8	5155.7	3481.5	6555.4	8796.9	22	0.00419	0.0137359		0.749752	21.6		gb:AF095707.1 DB_XREF=gi:3777597 GEN=rps17 TID=Os.2242.1 CNT=15 FEA=FLmRNA TIER=FL STK=1 UG=Os.2242 DEF=Oryza sativa clone LS273 30S ribosomal protein S17 (rps17) mRNA, nuclear gene encoding chloroplast protein, complete cds. PROD=30S ribosomal	LOC_Os04g59494		unspliced-genomic transportin-2, putative, expressed		AT2G16950	0	266523_at
Os.1811.1.S1_at	579.6	695.1	544	492.4	346	254.3	377.7	920.9	816.7	730.4	14.4	0.02406	0.00622391		644.3	926.7	675.3	551.9	275.6	338.9	362.1	990.1	784.5	443.6	13.6	0.00322	0.00655703		0.830692	14		gb:AB042415.1 DB_XREF=gi:13536992 GEN=OsRPA70a TID=Os.1811.1 CNT=13 FEA=FLmRNA TIER=FL STK=1 UG=Os.1811 DEF=Oryza sativa (japonica cultivar-group) OsRPA70a mRNA for replication protein A 70kDa, complete cds. PROD=replication protein A 70kDa FL=	LOC_Os02g53680		unspliced-genomic replication protein A 70 kDa DNA-binding subunit, putative, expressed		AT2G06510	0	265373_at
Os.7988.1.S1_s_at	48168.3	54650.8	33247.7	9146.2	24615	29536.9	50724.5	51010.1	29437	12744.6	10	8e-05	0.00414058		53743	45745.8	33264.3	14305.2	26417.3	34958.5	44638.5	41952.9	29215	11372.9	9.2	0.00015	0.00125439		0.944603	9.6		gb:AF017362.1 DB_XREF=gi:2407278 TID=Os.7988.1 CNT=17 FEA=FLmRNA TIER=FL STK=1 UG=Os.7988 DEF=Oryza sativa aldolase mRNA, complete cds. PROD=aldolase FL=gb:AF017362.1 REP_ORG=O. sativa	LOC_Os11g07020		unspliced-genomic fructose-bisphosphate aldolase, chloroplast precursor, putative, expressed		AT2G21330	2e-105	263761_at
Os.15877.1.S1_at	1167.1	4461.4	5310.3	2836.6	1541.5	1118.8	656	5815	5897.1	3301.8	15.2	0.00167	0.00488686		552.5	5727.7	7365.4	3067.2	1492.6	1002.4	520.1	6915.2	7108.3	3495.9	15.2	0.00155	0.00502515		0.990992	15.2		gb:AY278362.2 DB_XREF=gi:38426300 GEN=6PGDH2 TID=Os.15877.1 CNT=16 FEA=FLmRNA TIER=FL STK=1 UG=Os.15877 DEF=Oryza sativa (japonica cultivar-group) cytosolic 6-phosphogluconate dehydrogenase (6PGDH2) mRNA, complete cds. PROD=cytosolic 6-phosphogl	LOC_Os11g29400		unspliced-genomic 6-phosphogluconate dehydrogenase, decarboxylating, putative, expressed		AT5G41670	0	249266_at
Os.26940.1.S1_at	1516.6	1303	1122	1774.3	2102.7	1738.5	2141.7	1144	1069	1923.2	2	0.02172	0.021589		1515.8	1209.4	1165.5	1551.4	2197.4	1931.6	2026.6	1175	968	1531.1	2.4	0.0013	0.00294245		0.916854	2.2		gb:AY327043.1 DB_XREF=gi:32966062 TID=Os.26940.1 CNT=15 FEA=FLmRNA TIER=FL STK=1 UG=Os.26940 DEF=Oryza sativa (japonica cultivar-group) putative ATPase ATP1 mRNA, complete cds. PROD=putative ATPase ATP1 FL=gb:AY327043.1 gb:AK059564.1 gb:AK069248	LOC_Os01g49000		unspliced-genomic katanin p60 ATPase-containing subunit, putative, expressed		AT1G80350	0	260289_at
Os.5729.1.S1_at	2033.8	2119	1422.1	1420.6	1682.6	1814.4	2033.2	2816.3	2021.9	1440.3	10	0.04719	0.0153478		2216.4	2178.9	1767	1381.5	1472.1	1867.1	1792.9	2437	1794.7	1465.2	10.4	0.00337	0.00678197		0.858171	10.2		gb:AB099292.1 DB_XREF=gi:27529689 GEN=OsUEL-3 TID=Os.5729.1 CNT=15 FEA=FLmRNA TIER=FL STK=1 UG=Os.5729 DEF=Oryza sativa (japonica cultivar-group) OsUEL-3 mRNA for UDP-galactose 4-epimerase-like protein, complete cds. PROD=UDP-galactose 4-epimera	LOC_Os08g03570		unspliced-genomic UDP-arabinose 4-epimerase 3, putative, expressed		AT1G30620	0	263221_at
Os.4187.1.S1_at	7642.9	4589.1	4539.5	5256.7	5313.1	4881.7	5623.5	6085.2	5040.4	4489	7.2	0.23425	0.0410919		6104.7	5160.7	4908.4	4665	4884	4536.6	5846.8	6040	4955.2	4998.6	9.6	0.05397	0.0193101		0.764425	8.4		gb:L35845.1 DB_XREF=gi:642120 GEN=ORRab-2 TID=Os.4187.1 CNT=14 FEA=FLmRNA TIER=FL STK=1 UG=Os.4187 DEF=Oryza sativa small GTP-binding protein (ORRab-2) mRNA, complete cds. PROD=small GTP-binding protein FL=gb:AK100102.1 gb:L35845.1 gb:AK061099.	LOC_Os02g37420		unspliced-genomic ras-related protein Rab-2-A, putative, expressed		AT4G17170	3e-104	245407_at
Os.47039.1.S1_x_at	7069.1	12041.2	18889.6	26994.4	18458.5	14283.3	7304.3	10064.6	16271	18835.6	20.4	0.00095	0.00232895		4870.9	8314.2	14237	21362.6	17010.9	16458.4	6205.2	8208.3	16635	16744.7	21.6	0.00124	0.00501584		0.928514	21		gb:AF011331.1 DB_XREF=gi:2293479 TID=Os.47039.1 CNT=11 FEA=FLmRNA TIER=FL STK=1 UG=Os.47039 DEF=Oryza sativa glycine-rich protein mRNA, complete cds. PROD=glycine-rich protein FL=gb:AF011331.1 REP_ORG=O. sativa	LOC_Os12g43600		unspliced-genomic glycine-rich RNA-binding protein 2, putative, expressed		AT2G21660	2e-36	263548_at
Os.4494.1.S1_at	1726.7	894.2	608.6	1004.5	1312.6	1484.5	1294.7	940.7	581.2	1075.7	4	0.00179	0.00868098		795.4	694.9	595.5	704.5	982.6	947.6	997.9	625.3	489.8	715.7	3.6	0.00105	0.00372277		0.786845	3.8		gb:AB030956.1 DB_XREF=gi:6970471 GEN=OsGAI TID=Os.4494.1 CNT=21 FEA=FLmRNA TIER=FL STK=1 UG=Os.4494 DEF=Oryza sativa (japonica cultivar-group) mRNA for OsGAI, complete cds. PROD=OsGAI FL=gb:AB030956.1 REP_ORG=O. sativa	LOC_Os03g49990	GRAS	unspliced-genomic DELLA protein SLR1, putative, expressed		AT2G01570	2e-153	266331_at
Os.11751.1.S1_a_at	3275.5	5029.5	4460.5	5321.3	4215.5	3892	2865.7	4012.3	4190.7	4651.8	18.8	0.04833	0.0165824		2503.3	4544.1	4583.9	4546.5	3931.3	3160.1	2753.5	3823.9	5094.2	4660.8	17.6	0.0007	0.0048822		0.814226	18.2		gb:AY206984.1 DB_XREF=gi:28864538 GEN=DPK4 TID=Os.11751.1 CNT=17 FEA=FLmRNA TIER=FL STK=1 UG=Os.11751 DEF=Oryza sativa (japonica cultivar-group) serinethreonine protein kinase (DPK4) mRNA, complete cds. PROD=serinethreonine protein kinase FL=gb	LOC_Os06g45300		unspliced-genomic serine/threonine protein kinase, putative, expressed		AT2G24360	1e-161	265661_at
Os.19755.2.S1_a_at	9527.9	7294.6	2112.8	837.2	3041.1	1981.1	5760.3	4692	2357.2	1126.4	8.8	0.01437	0.00854498		8464	6465.7	1884.5	722.5	2759.3	2405	6608.5	7342.4	2411.2	882.2	9.2	0.00154	0.00317709		0.934625	9		gb:AF489111.1 DB_XREF=gi:19909125 TID=Os.19755.2 CNT=1 FEA=FLmRNA TIER=FL STK=1 UG=Os.19755 DEF=Oryza sativa putative Ca2+H+ exchanger mRNA, complete cds. PROD=putative Ca2+H+ exchanger FL=gb:AF489111.1 REP_ORG=O. sativa	LOC_Os01g37690		unspliced-genomic vacuolar cation/proton exchanger 1a, putative, expressed		AT3G51860	2e-131	246302_at
Os.413.1.S1_at	228.1	254.4	126.5	79.7	58.8	106.1	206.4	368.4	340.5	152.3	12.4	0.01948	0.00286943		209.4	658.9	245.8	158.5	88.4	148.8	115.9	446.6	217.6	134.2	12.4	0.06441	0.0401895		0.571455	12.4		gb:AY333184.1 DB_XREF=gi:33465886 TID=Os.413.1 CNT=15 FEA=FLmRNA TIER=FL STK=1 UG=Os.413 DEF=Oryza sativa (japonica cultivar-group) G-box binding protein mRNA, complete cds. PROD=G-box binding protein FL=gb:AY333184.1 gb:U42208.1 gb:AK121925.1	LOC_Os01g46970	bZIP	unspliced-genomic G-box-binding factor 1, putative, expressed		AT2G46270	7e-44	266555_at
Os.4179.1.S1_at	2580.3	8744.3	6404	2661.6	1046.7	641.6	923.4	11576.3	6737.2	5270.9	14	0.01032	0.0124036		2159.3	14772.2	9525.6	3819.5	1071.5	692	730.7	16135.8	7515.2	4243	14	0.01516	0.0160433		0.966453	14		gb:AB023498.1 DB_XREF=gi:5689137 GEN=RBE4 TID=Os.4179.1 CNT=14 FEA=FLmRNA TIER=FL STK=1 UG=Os.4179 DEF=Oryza sativa mRNA for starch branching enzyme rbe4, complete cds. PROD=starch branching enzyme rbe4 FL=gb:AB023498.1 REP_ORG=O. sativa	LOC_Os04g33460		unspliced-genomic 1,4-alpha-glucan branching enzyme IIB, chloroplast precursor, putative, expressed		AT5G03650	9e-98	250906_at
Os.28261.1.S1_a_at	881.7	914.3	984	739.2	808.2	771.2	856.6	1181.4	1027.9	913.1	13.6	0.04144	0.0173342		1039.3	1265	1293.9	1041	889.9	986.7	1060.3	1315.8	1184.7	1051.5	13.6	0.00026	0.0017861		0.794728	13.6		gb:AY331574.1 DB_XREF=gi:34555649 TID=Os.28261.1 CNT=13 FEA=FLmRNA TIER=FL STK=1 UG=Os.28261 DEF=Oryza sativa (indica cultivar-group) flowering time control protein isoform rFCA-4 mRNA, complete cds; alternatively spliced. PROD=flowering time con	LOC_Os09g03610		unspliced-genomic flowering time control protein FCA, putative, expressed		AT4G16280	3e-81	245489_at
Os.2223.1.S1_at	2083.6	2361	2736.5	3170.1	2635.1	2509.8	1741	2624.4	2758.8	2865.4	19.6	0.00414	0.0150249		1693	2273.9	2822.7	2925.9	2564.4	2509.7	1698	2567.6	2930.3	3090.1	19.2	0.00202	0.00677026		0.934564	19.4		gb:AB055495.1 DB_XREF=gi:17025925 GEN=Jab1 TID=Os.2223.1 CNT=13 FEA=FLmRNA TIER=FL STK=1 UG=Os.2223 DEF=Oryza sativa Jab1 mRNA for JUN-activation-domain-binding protein homolog, complete cds. PROD=JUN-activation-domain-binding protein homolog F	LOC_Os04g56070		unspliced-genomic COP9 signalosome complex subunit 5b, putative, expressed		AT1G22920	2e-148	264724_at
Os.17369.1.S1_a_at	11029.9	10038.9	6705.9	8333.8	10543.3	11005.2	12243	8306.1	5679.2	7349.4	5.2	0.00114	0.0058452		14815.6	8955.3	6554.2	7381.8	10444.5	10645.2	13059.4	8522.1	5886.3	9754	5.2	0.00969	0.0305522		0.842665	5.2		gb:AB073547.2 DB_XREF=gi:28201253 GEN=OsCRY1b TID=Os.17369.1 CNT=20 FEA=FLmRNA TIER=FL STK=1 UG=Os.17369 DEF=Oryza sativa (japonica cultivar-group) OsCRY1b mRNA for cryptochrome 1b, complete cds. PROD=cryptochrome 1b FL=gb:AB073547.2 gb:AB09856	LOC_Os04g37920		unspliced-genomic cryptochrome 1 apoprotein, putative, expressed		AT4G08920	0	255068_at
Os.10454.1.S1_a_at	4554.3	2698.2	3133.1	5962.4	8381.5	10271.9	6332.6	2051.6	2660.3	4668.2	2	0.00016	0.00107583		5270.3	1640.3	2536.8	6615.5	10028.8	10388.4	8589.3	2295.5	4440.1	5815.5	2	0.00053	0.00142199		0.947402	2		gb:AY187619.1 DB_XREF=gi:27948553 GEN=PEPC TID=Os.10454.1 CNT=14 FEA=FLmRNA TIER=FL STK=1 UG=Os.10454 DEF=Oryza sativa (indica cultivar-group) phosphoenolpyruvate carboxylase (PEPC) mRNA, complete cds. PROD=phosphoenolpyruvate carboxylase FL=gb	LOC_Os08g27840		unspliced-genomic phosphoenolpyruvate carboxylase 2, putative, expressed		AT1G53310	0	260590_at
Os.3433.1.S1_at	6416.7	8812.4	3198	2399.7	3857.5	4374.5	7748.7	8730.8	4254.6	2812.1	9.6	0.00309	0.010854		9742.3	9770.1	4671.6	2846.9	4913.3	4627	9956.5	10805.1	5184.8	3097.4	9.6	0.00074	0.00455022		0.965462	9.6		gb:AB040053.1 DB_XREF=gi:7592843 GEN=rCOP1 TID=Os.3433.1 CNT=13 FEA=FLmRNA TIER=FL STK=1 UG=Os.3433 DEF=Oryza sativa (japonica cultivar-group) rCOP1 mRNA for COP1, complete cds. PROD=COP1 FL=gb:AK111614.1 gb:AK102740.1 gb:AK112098.1 gb:AB040053	LOC_Os02g53140		unspliced-genomic ubiquitin ligase protein COP1, putative, expressed		AT2G32950	0	267640_at
Os.27112.1.S1_at	818.6	1315	1037.5	1797	2151.5	2284.2	1396.8	875.6	1226.7	1054.3	1.2	0.04086	0.032382		846.4	909.3	1002.7	1635.7	1751.8	2291.1	1429.1	865.8	1415	1015.1	1.6	0.06012	0.0148461		0.929506	1.4		gb:AY323485.1 DB_XREF=gi:33087074 GEN=PR2 TID=Os.27112.1 CNT=13 FEA=FLmRNA TIER=FL STK=1 UG=Os.27112 DEF=Oryza sativa (japonica cultivar-group) NPR1-like protein (PR2) mRNA, complete cds. PROD=NPR1-like protein FL=gb:AY323485.1 gb:AK120715.1 R	LOC_Os01g09800		unspliced-genomic regulatory protein NPR1, putative, expressed		AT1G64280	3e-124	259764_at
Os.7676.1.S1_at	19866.4	18690.5	7418.1	1463.7	1834.2	4160.2	12452.7	15653.6	7008.8	2634.1	10.4	0.00079	0.00123172		19065.9	16953.2	6906.6	2041.1	1827.6	4126.3	11519.3	13314.6	4851.6	1511.9	10	0.00155	0.00135708		0.992786	10.2		gb:AY476807.1 DB_XREF=gi:41352314 GEN=CaS TID=Os.7676.1 CNT=13 FEA=FLmRNA TIER=FL STK=1 UG=Os.7676 DEF=Oryza sativa extracellular calcium sensing receptor (CaS) mRNA, complete cds. PROD=extracellular calcium sensing receptor FL=gb:AK058726.1 gb	LOC_Os02g49680		unspliced-genomic calcium sensing receptor, putative, expressed		AT5G23060	4e-84	249876_at
Os.12625.4.S1_x_at	17583.3	19013.6	26968.9	30808.9	28313.2	24959.9	21365.1	18872.7	26774.2	27652.7	21.6	0.0005	0.00253524		13145.4	16453.1	28419	30856.7	27730.2	24077.7	21400.5	19738.7	26796.9	26660.3	20.8	0.00612	0.00736976		0.965984	21.2		gb:AF030517.1 DB_XREF=gi:2996095 TID=Os.12625.4 CNT=9 FEA=FLmRNA TIER=FL STK=1 UG=Os.12625 DEF=Oryza sativa translation elongation factor-1 alpha mRNA, complete cds. PROD=translation elongation factor-1 alpha FL=gb:AF030517.1 gb:AK073196.1 REP_	LOC_Os03g08010		unspliced-genomic elongation factor 1-alpha, putative, expressed		AT5G60390	0	247644_s_at
Os.27271.1.S1_a_at	253.8	147.2	126.4	303.3	1396.1	2822.7	466	283.5	195.6	294.8	2.8	0.03171	0.023693		183.7	85.7	126.1	529.2	1127.1	3113.4	587.2	492.7	129.1	242.7	2.8	0.05752	0.0258245		0.983325	2.8		gb:AY576676.1 DB_XREF=gi:46399154 GEN=MBP TID=Os.27271.1 CNT=9 FEA=FLmRNA TIER=FL STK=1 UG=Os.27271 DEF=Oryza sativa (japonica cultivar-group) membrane binding protein (MBP) mRNA, complete cds. PROD=membrane binding protein FL=gb:AY576676.1 RE	LOC_Os04g25650		unspliced-genomic protein kinase, putative, expressed		AT3G22060	6e-14	257264_at
Os.3141.1.S1_at	14392.3	9960.8	8551.2	3506.6	3677.2	3165.4	12003.7	11729.2	7907.8	4242.7	10.8	0.00282	0.00407788		13733.6	8930.7	6017.8	3223.2	2527.4	2147.5	7768.9	6211.8	5790.1	3137	10.4	0.03803	0.033016		0.911594	10.6		gb:AY151043.1 DB_XREF=gi:24850304 TID=Os.3141.1 CNT=9 FEA=FLmRNA TIER=FL STK=1 UG=Os.3141 DEF=Oryza sativa (japonica cultivar-group) transcription factor MYBS2 mRNA, complete cds. PROD=transcription factor MYBS2 FL=gb:AY151043.1 gb:AK121235.1 R	LOC_Os10g41260	MYB-related	unspliced-genomic mcb1 protein, putative, expressed		AT1G70000	5e-28	264692_at
Os.4148.1.S2_a_at	347.1	2344.3	4110.8	2331.4	1112.5	1018.5	327.2	2573.4	4147.7	2522.5	16.4	0.001	0.00570472		196.9	2822.6	5382.5	2727.5	1653.8	996.8	339.5	3429.6	4985.8	3117.8	16.4	0.00105	0.00566866		0.99378	16.4		gb:AB120430.1 DB_XREF=gi:37360970 GEN=rpoT2 TID=Os.4148.1 CNT=12 FEA=FLmRNA TIER=FL STK=1 UG=Os.4148 DEF=Oryza sativa (japonica cultivar-group) chloroplast rpoT2 mRNA for T7 bacteriophage-type single subunit RNA polymerase, complete cds. PROD=T7	LOC_Os06g44230		unspliced-genomic DNA-directed RNA polymerase 3, chloroplast precursor, putative, expressed		AT2G24120	0	265991_at
Os.2620.1.S1_at	541.3	995.2	1155.1	1607.4	1501.7	1198.9	1028.7	924.4	1406.9	1475.9	21.2	0.00276	0.00327633		601.3	739.9	1162.3	1169.3	1341.9	1129	925.8	877.6	1290.3	1565.6	21.2	0.0053	0.00223155		0.878348	21.2		gb:AF040700.1 DB_XREF=gi:4091007 TID=Os.2620.1 CNT=12 FEA=FLmRNA TIER=FL STK=1 UG=Os.2620 DEF=Oryza sativa methionyl-tRNA synthetase mRNA, complete cds. PROD=methionyl-tRNA synthetase FL=gb:AK059433.1 gb:AF040700.1 REP_ORG=O. sativa	LOC_Os06g31210		unspliced-genomic methionyl-tRNA synthetase, putative, expressed		AT4G13780	0	254734_at
Os.1150.1.S1_at	5720.7	3284.5	1197.7	550.7	1271.2	2693.7	6580.6	2797.4	1480	650.2	8	0.0014	0.00666223		8204.3	4032.8	2141.1	742	1589.8	3196.3	9076.2	4112.5	1951.4	853.9	8	0.0026	0.00769841		0.993798	8		gb:AB042936.1 DB_XREF=gi:12583662 GEN=Os-RelA2 TID=Os.1150.1 CNT=11 FEA=FLmRNA TIER=FL STK=1 UG=Os.1150 DEF=Oryza sativa (japonica cultivar-group) Os-RelA2 mRNA for chloroplast RelA homologue 2, complete cds. PROD=chloroplast RelA homologue 2 F	LOC_Os05g06890		unspliced-genomic relA-SpoT like protein RSH4, putative, expressed		AT3G17470	2e-163	258375_at
Os.2467.1.S1_at	4438.8	3017.5	3126.1	3770.1	6008.9	8534.9	8046.5	2302.7	2225	3828	3.6	0.00391	0.00553162		5693.1	3074.1	3133.4	4481.7	7949.5	8047.5	9259.5	2219.2	2548.1	4792	3.2	0.00253	0.00532127		0.956641	3.4		gb:AF288196.3 DB_XREF=gi:17438152 TID=Os.2467.1 CNT=10 FEA=FLmRNA TIER=FL STK=1 UG=Os.2467 DEF=Oryza sativa subsp. indica violaxanthin de-epoxidase precursor, mRNA, complete cds; nuclear gene for chloroplast product. PROD=violaxanthin de-epoxidas	LOC_Os04g31040		unspliced-genomic violaxanthin de-epoxidase, putative, expressed		AT1G08550	2e-167	264799_at
Os.4327.1.S1_at	389.5	473.9	270.9	793.1	824.3	974.7	580.4	414.9	347.1	890.6	0.8	0.00693	0.00922011		399.5	521.2	252.7	692	689.8	729.8	556.4	381.2	346.5	623.2	1.2	0.01876	0.0176722		0.951403	1		gb:AF384030.1 DB_XREF=gi:15290604 TID=Os.4327.1 CNT=8 FEA=FLmRNA TIER=FL STK=1 UG=Os.4327 DEF=Oryza sativa seven transmembrane protein MLO2 mRNA, complete cds. PROD=seven transmembrane protein MLO2 FL=gb:AK098993.1 gb:AF384030.1 gb:AK111990.1 R	LOC_Os03g03700		unspliced-genomic MLO protein homolog 1, putative, expressed		AT1G11310	6e-122	262455_at
Os.22775.1.S2_a_at	4666.1	3854.6	3957.8	3912.5	4660.8	4979.3	5550.8	4076	3666.5	4530.8	4	0.01413	0.0122928		5781.3	4570.1	4031.2	4696.2	4859.5	5008.9	5669.9	4128.1	3762.1	4569.5	4.8	0.01528	0.0179962		0.806514	4.4		gb:CB634073 DB_XREF=gi:29629062 DB_XREF=OSIIEb13F12.r CLONE=OSIIEb13F12 TID=Os.22775.1 CNT=15 FEA=FLmRNA TIER=ConsEnd STK=1 UG=Os.22775 UG_TITLE=(japonica cultivar-group) isolate 23264 putative ATP synthetase alpha chain mRNA, complete cds FL=g	LOC_Os02g54624		unspliced-genomic protein binding protein, putative, expressed		AT4G32600	5e-82	253444_at
Os.1605.1.S1_at	3384.4	16079	12851.7	2989.6	173.3	97.2	366.2	17808.6	15753.9	2698.9	14	0.00238	0.00599972		6154.4	20592.1	21219.2	2417.8	133.5	108.7	291	22833.3	19045.6	4640.5	14	0.0018	0.00669296		0.983932	14		gb:AB050884.1 DB_XREF=gi:13442815 GEN=OsABA2 TID=Os.1605.1 CNT=14 FEA=FLmRNA TIER=FL STK=1 UG=Os.1605 DEF=Oryza sativa (japonica cultivar-group) OsABA2 mRNA for zeaxanthin epoxidase, complete cds. PROD=zeaxanthin epoxidase FL=gb:AB050884.1 REP	LOC_Os04g37619		unspliced-genomic zeaxanthin epoxidase, chloroplast precursor, putative, expressed		AT5G67030	0	247025_at
Os.11849.1.S1_at	400.6	538.4	870	1033.4	1333.4	927.7	675.3	536.8	732.9	1299.4	22.8	0.00039	0.00454		459.6	652.9	1093.8	1407.4	1858	1255.7	644.7	888.3	993	1613.3	22.4	0.00042	0.00277972		0.96563	22.6		gb:AY373258.1 DB_XREF=gi:34809051 TID=Os.11849.1 CNT=12 FEA=FLmRNA TIER=FL STK=1 UG=Os.11849 DEF=Oryza sativa (japonica cultivar-group) starch synthase IVb precursor, mRNA, complete cds. PROD=starch synthase IVb precursor FL=gb:AY373258.1 gb:AK0	LOC_Os05g45720		unspliced-genomic glycogen synthase, putative, expressed		AT4G18240	0	254659_at
Os.10901.1.S1_a_at	39115.1	23893.2	1726.9	339.6	902	6091.5	38773.3	23976	1709.7	531.9	8.8	0.00226	0.00684023		50949	28310.8	2059.6	370.2	1320.8	9516.3	44462.7	25623.4	1967	348.5	8.4	0.00213	0.00557087		0.9948	8.6		gb:AY452478.1 DB_XREF=gi:38455771 GEN=COC1 TID=Os.10901.1 CNT=12 FEA=FLmRNA TIER=FL STK=1 UG=Os.10901 DEF=Oryza sativa (japonica cultivar-group) circadian oscillator component (COC1) mRNA, complete cds. PROD=circadian oscillator component FL=gb	LOC_Os08g06110	MYB-related	unspliced-genomic LHY protein, putative, expressed		AT1G01060	3e-84	261569_at
Os.11120.1.S1_at	421.4	268	174.7	1098.6	1160.6	1154.3	712.5	177.7	234.2	367.9	1.6	0.0041	0.00207187		278.1	128.3	136.3	597.2	653.9	795.3	848.8	138	219.4	345	2.4	0.01665	0.00728796		0.872002	2		gb:AY323478.1 DB_XREF=gi:33087060 GEN=cap2 TID=Os.11120.1 CNT=11 FEA=FLmRNA TIER=FL STK=1 UG=Os.11120 DEF=Oryza sativa (japonica cultivar-group) ap2 domain containing protein (cap2) mRNA, complete cds. PROD=ap2 domain containing protein FL=gb:A	LOC_Os03g08460	AP2-EREBP	unspliced-genomic transcription factor EREBP, putative, expressed		AT1G72360	1e-17	260451_at
Os.5242.1.S1_at	3133	1163.4	954	5847.2	3582.7	2201.6	2266.7	1046.7	1553.5	5046.3	23.2	0.05697	0.0398136		1381.4	521.7	483.7	3658.7	2976.7	1635.6	1597.6	902.6	819.7	2086.2	0	0.01902	0.0190964		0.890649	23.6		gb:AF200467.1 DB_XREF=gi:9957713 TID=Os.5242.1 CNT=10 FEA=FLmRNA TIER=FL STK=1 UG=Os.5242 DEF=Oryza sativa subtilase mRNA, complete cds. PROD=subtilase FL=gb:AF200467.1 REP_ORG=O. sativa	LOC_Os01g58260		unspliced-genomic peptidase/ subtilase, putative, expressed		AT1G32940	1e-156	261240_at
Os.7085.1.S1_a_at	471.2	479.7	824.5	626.6	659	562.3	474.7	659.6	733.2	473.9	17.6	0.25449	0.0440846		605	701.4	737.8	738.4	740.4	620.8	619.3	681.6	711.9	655.4	18.4	0.04823	0.0366148		0.714843	18		gb:U63530.1 DB_XREF=gi:1488296 TID=Os.7085.1 CNT=10 FEA=FLmRNA TIER=FL STK=1 UG=Os.7085 DEF=Oryza sativa osRAD23 mRNA, complete cds. PROD=osRAD23 FL=gb:U63530.1 gb:AK066105.1 gb:AK103130.1 REP_ORG=O. sativa	LOC_Os09g24200		unspliced-genomic DNA repair protein RAD23, putative, expressed		AT5G38470	2e-107	249512_at
Os.12645.1.S1_at	4682.7	2513.7	1433.5	1454.5	2233.2	2249.8	3685.2	3565	1752.5	2060	7.6	0.01502	0.0116761		4657.3	4101.4	2253.3	1857.4	2454.7	1880.9	4060.8	4059.1	2057.3	2050.6	9.6	0.00848	0.0108052		0.882664	8.6		gb:AB125302.1 DB_XREF=gi:46917329 GEN=SAPK1 TID=Os.12645.1 CNT=9 FEA=FLmRNA TIER=FL STK=1 UG=Os.12645 DEF=Oryza sativa (japonica cultivar-group) SAPK1 mRNA for serinethreonine protein kinase SAPK1, complete cds. PROD=serinethreonine protein kina	LOC_Os03g27280		unspliced-genomic serine/threonine-protein kinase SAPK1, putative, expressed		AT1G78290	9e-142	260774_at
Os.6367.1.S1_at	684.8	1043.3	1025	1331	1284.3	856.1	850.6	1106.8	1056.9	1899.4	20.4	0.03249	0.0207012		861.7	938.5	1232.9	1459.3	1395.6	735.7	1018	1449.2	1328	1832.3	19.2	0.03186	0.0293753		0.888129	19.8		gb:AB071291.1 DB_XREF=gi:19352034 GEN=OsETTIN2 TID=Os.6367.1 CNT=13 FEA=FLmRNA TIER=FL STK=1 UG=Os.6367 DEF=Oryza sativa OsETTIN2 mRNA for Arabidopsis ETTIN-like protein 2, complete cds. PROD=Arabidopsis ETTIN-like protein 2 FL=gb:AK103776.1 gb	LOC_Os01g48060	ARF	unspliced-genomic auxin response factor 3, putative, expressed		AT2G33860	7e-135	267452_at
Os.12432.1.S1_a_at	5128.6	2914.9	1915.6	3898.8	3456.8	4595.5	4505.5	3128	2246.3	3549.6	4.4	0.0133	0.018852		4220.4	1708.7	1288.4	2080.6	3148	3071.1	3998.9	2392	1321.7	2112.5	4.8	0.00343	0.0111261		0.890314	4.6		gb:AB101645.1 DB_XREF=gi:31339096 GEN=Roc2 TID=Os.12432.1 CNT=10 FEA=FLmRNA TIER=FL STK=1 UG=Os.12432 DEF=Oryza sativa (japonica cultivar-group) Roc2 mRNA for GL2-type homeodomain protein, complete cds. PROD=GL2-type homeodomain protein FL=gb:A	LOC_Os04g53540	HB	unspliced-genomic homeobox protein GLABRA2, putative, expressed		AT1G05230	0	264582_at
Os.48429.1.S1_at	400.1	218	259.1	297.5	342.3	482.5	321.8	205.5	247.3	258.2	3.2	0.00599	0.00969208		258.2	223.7	168.3	216	247	327.7	354.9	144.4	133.5	190.1	4.4	0.0058	0.0119561		0.738137	3.8		gb:U50333.1 DB_XREF=gi:1854636 TID=Os.48429.1 CNT=10 FEA=FLmRNA TIER=FL STK=1 UG=Os.48429 DEF=Oryza sativa gibberellin C-20 oxidase mRNA, complete cds. PROD=gibberellin C-20 oxidase FL=gb:AK099111.1 gb:AK061017.1 gb:U50333.1 REP_ORG=O. sativa	LOC_Os03g63970		unspliced-genomic gibberellin 20 oxidase 1, putative, expressed		AT4G25420	1e-116	254065_at
Os.25588.1.S1_a_at	518.6	359.6	309.7	334.3	375.8	591	538.6	250.6	267.7	251.6	4.8	0.00262	0.00821279		480.4	201.1	68.1	148.2	247.4	205.5	409.9	217.5	126.8	124	6.4	0.01449	0.0424386		0.685347	5.6		gb:AY323480.1 DB_XREF=gi:33087064 GEN=MYB TID=Os.25588.1 CNT=9 FEA=FLmRNA TIER=FL STK=1 UG=Os.25588 DEF=Oryza sativa (japonica cultivar-group) putative myb protein (MYB) mRNA, complete cds. PROD=putative myb protein FL=gb:AY323480.1 REP_ORG=O.	LOC_Os07g43580	MYB	unspliced-genomic MYB94, putative, expressed		AT3G28910	7e-78	257140_at
Os.7516.1.S1_at	593.9	557.1	643.4	2617.9	1818.9	1563.1	830.2	567.2	915	1196.3	23.2	0.0152	0.0116079		509.4	529.1	618.4	1615.9	2172.6	740.8	1152.6	553.9	1237.4	3034.8	22.4	0.02821	0.0260669		0.506801	22.8		gb:AB115419.1 DB_XREF=gi:33235564 GEN=srp54-2 TID=Os.7516.1 CNT=8 FEA=FLmRNA TIER=FL STK=1 UG=Os.7516 DEF=Oryza sativa (japonica cultivar-group) srp54-2 mRNA for signal recognition particle 54kDa subunit, complete cds. PROD=signal recognition pa	LOC_Os05g43390		unspliced-genomic signal recognition particle 54 kDa protein 2, putative, expressed		AT1G48900	0	246628_at
Os.2356.1.S1_a_at	689.4	599.6	672	1071.1	1192.7	910.9	1136.2	676.7	652.6	372.2	2.8	0.22278	0.0261038		990.2	571.8	716.4	1152.1	1056.5	1596.1	1282.5	465	940.2	603.6	2.8	0.05387	0.0231288		0.692374	2.8		gb:AY524973.1 DB_XREF=gi:42528296 GEN=BIMK2 TID=Os.2356.1 CNT=7 FEA=FLmRNA TIER=FL STK=1 UG=Os.2356 DEF=Oryza sativa (indica cultivar-group) benzothiadiazole-induced MAP kinase 2 (BIMK2) mRNA, complete cds. PROD=benzothiadiazole-induced MAP kina	LOC_Os02g04230		unspliced-genomic OsMPK17-2 - putative MAPK based on amino acid sequence homology, expressed		AT3G18040	0	258123_at
Os.276.1.S1_at	1046	1165.5	1550.1	2024.5	1746.6	1680.3	1177.1	1259.2	1489	2132.5	21.6	0.0003	0.00212155		881.8	1112.4	1521.7	1990.4	2100.2	1638.6	1038.3	1258.3	1693.1	2518.1	21.6	0.00019	0.00255557		0.958423	21.6		gb:AB045677.1 DB_XREF=gi:10798805 GEN=OsRFC2 TID=Os.276.1 CNT=7 FEA=FLmRNA TIER=FL STK=1 UG=Os.276 DEF=Oryza sativa (japonica cultivar-group) OsRFC2 mRNA for replication factor C 37 kDa subunit, complete cds. PROD=replication factor C 37 kDa sub	LOC_Os12g07720		unspliced-genomic replication factor C subunit 2, putative, expressed		AT1G21690	5e-151	262501_at
Os.49150.1.S1_at	1236.9	1114.9	866.4	1359.3	1413.6	1325.5	1336	827.4	744.5	1026	2.8	0.01366	0.0077273		1553	978.8	959.9	1238.8	1586.2	1301.2	1386.7	904.5	1000	1261.4	2.4	0.01087	0.00799518		0.803193	2.6		gb:AY463361.1 DB_XREF=gi:38679442 GEN=BISERK1 TID=Os.49150.1 CNT=7 FEA=FLmRNA TIER=FL STK=1 UG=Os.49150 DEF=Oryza sativa (indica cultivar-group) benzothiadiazole-induced somatic embryogenesis receptor kinase 1 (BISERK1) mRNA, complete cds. PROD=	LOC_Os08g07760		unspliced-genomic BRASSINOSTEROID INSENSITIVE 1-associated receptor kinase 1 precursor, putative, expressed		AT1G34210	0	262563_at
Os.27943.1.S1_a_at	672.1	4775.1	4144.9	554.9	299.2	280.5	348.7	6923.6	7090.2	748.1	14	0.01104	0.0109308		941.1	5920.7	8749.7	584.8	418.6	270	246.8	7651	10654	1623.2	14.4	0.00753	0.0101906		0.951493	14.2		gb:AY551100.1 DB_XREF=gi:45272583 GEN=PEAMT TID=Os.27943.1 CNT=7 FEA=FLmRNA TIER=FL STK=1 UG=Os.27943 DEF=Oryza sativa (indica cultivar-group) phosphoethanolamine N-methyltransferase (PEAMT) mRNA, complete cds. PROD=phosphoethanolamine N-methylt	LOC_Os01g50030		unspliced-genomic phosphoethanolamine N-methyltransferase, putative, expressed		AT3G18000	0	258217_at
Os.27943.1.S1_s_at	760.4	5095.5	5999.5	1519.3	508.6	457.4	453.3	6539.5	7700.4	2357.4	14.8	0.00262	0.0054097		997.1	6607.5	9761.4	1556.4	694.3	538	330.1	7561.1	12207.2	2706.5	14.8	0.00575	0.00933886		0.980038	14.8		gb:AY551100.1 DB_XREF=gi:45272583 GEN=PEAMT TID=Os.27943.1 CNT=7 FEA=FLmRNA TIER=FL STK=1 UG=Os.27943 DEF=Oryza sativa (indica cultivar-group) phosphoethanolamine N-methyltransferase (PEAMT) mRNA, complete cds. PROD=phosphoethanolamine N-methylt	LOC_Os01g50030		unspliced-genomic phosphoethanolamine N-methyltransferase, putative, expressed		AT3G18000	0	258217_at
Os.4608.3.A1_a_at	13501.4	14157	20586.8	24794.9	18396.8	16782.4	15724.7	14649.1	21343.5	20219.1	20	0.00355	0.0135815		10283.9	9952.8	19177.8	20804.7	16008.7	13977.1	13447	12518.3	19656.8	19242	20	0.00308	0.0116481		0.966455	20		gb:CB659494 DB_XREF=gi:29663219 DB_XREF=OSJNEc16I15.r CLONE=OSJNEc16I15 TID=Os.4608.3 CNT=47 FEA=EST TIER=Stack STK=13 UG=Os.4608 UG_TITLE=(japonica cultivar-group) HOS59 mRNA, complete cds REP_ORG=O. sativa	LOC_Os06g43860	HB	unspliced-genomic homeobox protein knotted-1-like 3, putative, expressed		AT5G25220	4e-109	246930_at
Os.49541.1.S1_at	3740	4344.2	4643.8	6634.4	7846.2	6747.2	6022.9	4213.5	5014.5	7183.2	0	0.00188	0.0019163		3601.3	3366.9	3781.2	4904	5903.3	4944.1	4452.5	3815.9	4214.4	5567.8	0	0.00084	0.00144734		0.969233	0		gb:L24390.1 DB_XREF=gi:453691 GEN=PF1 TID=Os.49541.1 CNT=7 FEA=FLmRNA TIER=FL STK=1 UG=Os.49541 UG_TITLE=Positive element factor 1 (PF1) mRNA, complete cds DEF=Oryza sativa positive element factor 1 (PF1) mRNA, complete cds. FL=gb:L24390.1 gb:A	LOC_Os09g23730		unspliced-genomic HMG-Y-related protein A, putative, expressed		AT1G14900	6e-15	262840_at
Os.2220.1.S1_at	481.9	310.3	240.5	232.6	320.7	432.8	607.9	400.3	208.1	217.2	6.4	0.00077	0.00314777		689	399.1	270	316.2	346.3	541.3	733.4	381.1	240.4	306.7	6.4	0.00152	0.00907736		0.947171	6.4		gb:AF075603.1 DB_XREF=gi:3328363 GEN=kapp TID=Os.2220.1 CNT=6 FEA=FLmRNA TIER=FL STK=1 UG=Os.2220 DEF=Oryza sativa kinase associated protein phosphatase (kapp) mRNA, complete cds. PROD=kinase associated protein phosphatase FL=gb:AF075603.1 REP	LOC_Os07g11010		unspliced-genomic protein Kinase-associated protein phosphatase, putative, expressed		AT5G19280	6e-135	249924_at
Os.3399.1.S1_at	5413.1	1294.6	261.1	135.3	290.5	543.7	3718.6	1055.7	338.6	181.5	7.6	0.03864	0.0295809		4614.3	1056.1	267.2	201	261.6	386.7	4312.6	1252.3	323.5	141.6	8	0.0343	0.027307		0.981141	7.8		gb:AB001887.1 DB_XREF=gi:3618317 TID=Os.3399.1 CNT=6 FEA=FLmRNA TIER=FL STK=1 UG=Os.3399 DEF=Oryza sativa (japonica cultivar-group) cDNA for zinc finger protein, complete cds, clone:S12569. PROD=zinc finger protein FL=gb:AB001887.1 REP_ORG=O. s	LOC_Os09g06464	C2C2-CO-like	unspliced-genomic zinc finger protein CONSTANS-LIKE 2, putative, expressed		AT5G15850	2e-24	246523_at
Os.2449.1.S1_s_at	615.8	805	633.1	431.7	469.5	485	483.2	746.1	563.9	618.6	12.8	0.04712	0.024868		904	997.7	929.4	632.3	616.1	607.3	589.2	921.3	676.9	670.7	12.8	0.05487	0.0142503		0.883269	12.8		gb:AF242298.1 DB_XREF=gi:9716452 TID=Os.2449.1 CNT=5 FEA=FLmRNA TIER=FL STK=1 UG=Os.2449 DEF=Oryza sativa telomere binding protein-1 mRNA, complete cds. PROD=telomere binding protein-1 FL=gb:AF242298.1 REP_ORG=O. sativa	LOC_Os02g57270	MYB-related	unspliced-genomic initiator binding protein, putative, expressed		AT1G07540	2e-63	261061_at
Os.55800.1.S1_at	1031.1	352.6	376.2	1590.6	1430.6	2405.5	1109	324.1	386.9	892.8	2	0.00252	0.00473127		442.5	174.2	191.5	798.4	876.5	1352.4	756.7	144.8	223.3	745.4	2	0.00098	0.00257327		0.960836	2		gb:AK108820.1 DB_XREF=gi:32994029 TID=Os.55800.1 CNT=5 FEA=FLmRNA TIER=FL STK=1 UG=Os.55800 UG_TITLE=OsMST1 mRNA for monosaccharide transporter 1, complete cds DEF=Oryza sativa (japonica cultivar-group) cDNA clone:002-151-E11, full insert sequenc	LOC_Os04g37980		unspliced-genomic sugar transport protein 5, putative, expressed		AT1G34580	3e-156	261181_at
Os.5288.1.S1_a_at	714.5	1738.8	757.5	409.7	253.4	211.7	973	1103.7	1139.4	528.2	12.4	0.00449	0.00956695		762.4	2086	1120.6	464.2	243.5	192.7	675.4	1463.8	1507.2	449.7	13.2	0.00183	0.00977883		0.949103	12.8		gb:AB112060.1 DB_XREF=gi:31711496 GEN=OsMGDGs TID=Os.5288.1 CNT=4 FEA=FLmRNA TIER=FL STK=1 UG=Os.5288 DEF=Oryza sativa (indica cultivar-group) OsMGDGs gene for putative monogalactosyldiacylglycerol synthase, complete cds. PROD=putative monogalac	LOC_Os02g55910		unspliced-genomic MGD2, putative, expressed		AT5G20410	1e-156	246075_at
Os.11770.1.S1_at	723	416.4	1447.9	3162	2749.1	656.8	1409	366.8	644.4	4832.4	22	0.02299	0.0320158		778.3	233	1397	4882	2195.4	555.5	1392.6	353.3	707.9	4127.3	21.6	0.02953	0.0296633		0.915482	21.8		gb:AF014469.1 DB_XREF=gi:2429289 GEN=POX5.1 TID=Os.11770.1 CNT=4 FEA=FLmRNA TIER=FL STK=1 UG=Os.11770 DEF=Oryza sativa peroxidase (POX5.1) mRNA, complete cds. PROD=peroxidase FL=gb:AF014469.1 REP_ORG=O. sativa	LOC_Os07g48040		unspliced-genomic peroxidase 2 precursor, putative, expressed		AT5G05340	1e-90	250798_at
Os.7329.1.S1_s_at	83.5	41.9	102.2	361.8	240.8	209.3	128.6	113.1	96.3	256.1	23.2	0.00678	0.0111065		117.7	39.2	115.5	332.2	259.5	227.3	74.7	40.9	116.2	254.3	23.2	0.00019	0.00314312		0.940009	23.2		gb:AY341827.1 DB_XREF=gi:33519167 TID=Os.7329.1 CNT=3 FEA=FLmRNA TIER=FL STK=1 UG=Os.7329 DEF=Oryza sativa (japonica cultivar-group) AP2 domain-containing protein AP29 mRNA, complete cds. PROD=AP2 domain-containing protein AP29 FL=gb:AY341827.1	LOC_Os08g42550	AP2-EREBP	unspliced-genomic AP2 domain containing protein, expressed		AT1G52630	3e-165	262143_at
Os.12362.1.S1_at	4126.5	5731	11488.1	12597.6	10527	10381.6	8488.7	4564.3	9386	11794.1	21.6	0.00873	0.00661051		2475.1	3684.5	9110.9	11595.3	9887.2	10721.8	6792	4725.2	8014.8	10098.7	22.4	0.00661	0.00258191		0.958146	22		gb:AY323130.1 DB_XREF=gi:32493111 TID=Os.12362.1 CNT=93 FEA=FLmRNA TIER=FL STK=1 UG=Os.12362 DEF=Oryza sativa (japonica cultivar-group) ribosomal protein large subunit 13 mRNA, complete cds. PROD=ribosomal protein large subunit 13 FL=gb:AK070375	LOC_Os03g37970		unspliced-genomic 60S ribosomal protein L13-2, putative, expressed		AT3G49010	6e-81	252294_at
Os.12203.1.S1_at	2858.7	4307.3	8177.2	8987.3	7263	6610.9	3627.2	4412.5	7564	8486.6	20.4	0.00023	0.00212209		1455.7	3462.3	7958.9	8948.8	6896.9	6558.4	2928.9	4434.3	7099.6	8061.1	20.4	0.00104	0.00310964		0.991025	20.4		gb:AF529175.1 DB_XREF=gi:22671663 GEN=RPS7 TID=Os.12203.1 CNT=67 FEA=FLmRNA TIER=FL STK=1 UG=Os.12203 DEF=Oryza sativa (japonica cultivar-group) ribosomal protein S7 (RPS7) mRNA, complete cds. PROD=ribosomal protein S7 FL=gb:AK104191.1 gb:AF529	LOC_Os05g27940		unspliced-genomic 40S ribosomal protein S7, putative, expressed		AT1G48830	5e-81	256143_at
Os.6323.2.S1_a_at	5892.9	8958.8	8221.6	5761.5	3802.9	3530.5	3936.7	10272.9	8972.3	5413.1	14	0.00105	0.00396257		5860.6	13253.4	8135.8	5277.6	3328.8	3294.1	4149.9	13113.3	9131.5	4862.4	13.2	0.00571	0.0100139		0.945036	13.6		gb:AK061786.1 DB_XREF=gi:32971804 TID=Os.6323.2 CNT=57 FEA=FLmRNA TIER=FL STK=1 UG=Os.6323 UG_TITLE=GF14-c protein mRNA, complete cds DEF=Oryza sativa (japonica cultivar-group) cDNA clone:001-039-E09, full insert sequence. FL=gb:AK061786.1 gb:AK	LOC_Os08g33370		unspliced-genomic 14-3-3-like protein, putative, expressed		AT3G02520	1e-125	258489_at
Os.12780.1.S1_at	861.8	758.5	1279.3	1633.9	1191	1174.1	1119.8	821.6	1273.1	1623.7	21.2	0.00712	0.01341		704.1	446.5	772.4	1335.6	704.3	635.9	649.2	521.2	829.8	931.7	20.8	0.06207	0.0469086		0.864157	21		gb:AF429947.1 DB_XREF=gi:16566703 TID=Os.12780.1 CNT=59 FEA=FLmRNA TIER=FL STK=1 UG=Os.12780 DEF=Oryza sativa putative fructokinase II mRNA, complete cds. PROD=putative fructokinase II FL=gb:AK070120.1 gb:AK061391.1 gb:AK099353.1 gb:AB110164.1 g	LOC_Os08g02120		unspliced-genomic fructokinase-2, putative, expressed		AT4G10260	2e-138	255806_at
Os.4169.1.S1_at	848.7	1127.9	1385.5	992.9	846.3	954.3	922.5	1404.1	1780.3	1368	15.6	0.02159	0.00737312		1169.2	1410.7	2694.9	1921.7	794.4	1077.5	900.6	1192	2683.9	1027.7	16	0.05017	0.027041		0.670572	15.8		gb:D01000.1 DB_XREF=gi:218225 TID=Os.4169.1 CNT=35 FEA=FLmRNA TIER=FL STK=1 UG=Os.4169 DEF=Oryza sativa mRNA for copperzinc-superoxide dismutase, complete cds, clone:RSODB. PROD=copperzinc-superoxide dismutase FL=gb:D01000.1 REP_ORG=O. sativa	LOC_Os07g46990		unspliced-genomic superoxide dismutase 2, putative, expressed		AT1G08830	2e-71	264809_at
Os.37856.1.S1_at	8042.1	9104.7	13066.4	14495.3	11954.2	11335.8	8673.1	9255.4	13358.6	14072.7	20.4	0.00014	0.00281512		4129.7	6456.3	13413	14173	10957	10815.5	6093.1	8134.6	11868.5	12846	20.4	0.00174	0.00474319		0.969972	20.4		gb:L31941.1 DB_XREF=gi:967984 TID=Os.37856.1 CNT=35 FEA=FLmRNA TIER=FL STK=1 UG=Os.37856 DEF=Oryza sativa (clone rma630) ribosomal protein-linked ubiquitin mRNA, complete cds. PROD=ribosomal protein-linked ubiquitin FL=gb:L31941.1 gb:AK119731.1	LOC_Os05g06770		unspliced-genomic 40S ribosomal protein S27a, putative, expressed		AT2G47110	1e-63	266768_s_at
Os.9193.1.S1_at	11120.7	9125	16249.4	19046.1	18343.4	18315.1	17966.1	8657.2	16972.8	18660.5	23.2	0.02969	0.0216894		8077.1	6143	14941.1	18956.9	17529.4	16653.8	15470.6	8339.5	14518.9	16897.4	22.8	0.01314	0.0068144		0.973974	23		gb:L36313.1 DB_XREF=gi:538427 TID=Os.9193.1 CNT=34 FEA=FLmRNA TIER=FL STK=1 UG=Os.9193 DEF=Oryza sativa ribosomal protein S16 mRNA, complete cds. PROD=ribosomal protein S16 FL=gb:L36313.1 gb:AK059550.1 REP_ORG=O. sativa	LOC_Os11g03400		unspliced-genomic 40S ribosomal protein S16, putative, expressed		AT2G09990	2e-61	263821_s_at
Os.9193.1.S1_s_at	3238.8	2460.9	6670.4	7635.5	8437.6	6671.7	5782.1	2802	6237.8	6915.9	22.8	0.00432	0.00549534		2305.7	1889	5380.5	7366.1	6381.3	5437.4	4169.6	2447.5	5217.1	7203.4	22	0.00039	0.00227733		0.944086	22.4		gb:L36313.1 DB_XREF=gi:538427 TID=Os.9193.1 CNT=34 FEA=FLmRNA TIER=FL STK=1 UG=Os.9193 DEF=Oryza sativa ribosomal protein S16 mRNA, complete cds. PROD=ribosomal protein S16 FL=gb:L36313.1 gb:AK059550.1 REP_ORG=O. sativa	LOC_Os11g03400		unspliced-genomic 40S ribosomal protein S16, putative, expressed		AT2G09990	2e-61	263821_s_at
Os.12413.1.S1_at	4079.2	8558.7	10742.5	12743.4	9584.4	8412.3	4148.8	7095.4	9313.1	11190.5	20	0.00108	0.00241272		2003.9	4470.3	9150.5	11410.8	8104.7	7894	3547.1	5747.6	9003.5	9823.7	20.4	0.00087	0.00383187		0.935818	20.2		gb:AB117995.1 DB_XREF=gi:42733477 GEN=bip108 TID=Os.12413.1 CNT=28 FEA=FLmRNA TIER=FL STK=1 UG=Os.12413 DEF=Oryza sativa (japonica cultivar-group) bip108 mRNA for BRI1-KD interacting protein 108, complete cds. PROD=BRI1-KD interacting protein 10	LOC_Os03g22340		unspliced-genomic 60S ribosomal protein L22-2, putative, expressed		AT3G05560	5e-41	259112_at
Os.10276.1.S1_at	9315	9209.5	8477	10172.2	10973.5	10200.9	10644.8	9528.8	9381.2	9923.1	2	0.03508	0.0128372		8963.1	8793.5	8481	10620.7	10312.8	10260.9	10253.3	8966.1	9427	9621.1	1.2	0.03617	0.0165324		0.896542	1.6		gb:AF012896.1 DB_XREF=gi:2293565 GEN=Os-ARF1 TID=Os.10276.1 CNT=35 FEA=FLmRNA TIER=FL STK=1 UG=Os.10276 DEF=Oryza sativa ADP-ribosylation factor 1 (Os-ARF1) mRNA, complete cds. PROD=ADP-ribosylation factor 1 FL=gb:AF012896.1 REP_ORG=O. sativa	LOC_Os07g12200		unspliced-genomic ADP-ribosylation factor 1, putative, expressed		AT2G47170	1e-100	263321_at
Os.4188.1.S1_at	3439.5	3729.4	4144.9	4088	3616.2	3523.4	3238.1	4486.5	4128.6	4187.4	16.8	0.01914	0.0232441		3816.6	4457.1	4148.1	4246.6	3605.1	3526.1	3269.3	4356.4	4552.1	4314	16	0.00588	0.00664587		0.81165	16.4		gb:AB029060.2 DB_XREF=gi:5821431 GEN=OsIF1-2 TID=Os.4188.1 CNT=25 FEA=FLmRNA TIER=FL STK=1 UG=Os.4188 DEF=Oryza sativa (japonica cultivar-group) OsIF1-2 mRNA for F1F0-ATPase inhibitor protein, complete cds. PROD=F1F0-ATPase inhibitor protein FL	LOC_Os09g39550		unspliced-genomic expressed protein		AT2G27730	4e-23	266206_at
Os.8873.1.S1_at	20242.9	15021.7	7096.8	5483.5	9654.7	12297.2	15506.5	19678.5	8157.1	5712	8.4	0.00138	0.0028836		21137.2	15837.2	7357.1	5107.2	8093.5	10260	13613.5	16907.5	7620.6	5240.2	8.8	0.00193	0.00221957		0.974049	8.6		gb:AB074411.1 DB_XREF=gi:20152202 GEN=OsUBC5a TID=Os.8873.1 CNT=24 FEA=FLmRNA TIER=FL STK=1 UG=Os.8873 DEF=Oryza sativa (japonica cultivar-group) mRNA for ubiquitin-conjugating enzyme OsUBC5a, complete cds. PROD=ubiquitin-conjugating enzyme OsUB	LOC_Os01g46926		unspliced-genomic ubiquitin-conjugating enzyme E2-17 kDa 9, putative, expressed		AT4G27960	5e-82	253826_s_at
Os.142.2.A1_a_at	2137.9	7710.5	6618.4	3632.8	2652.5	3976.1	2516.3	5176.8	5417.9	6033.9	15.2	0.0634	0.0373245		3049.5	9730	6130.5	6631.9	4513	3290.4	1967.2	5261.8	6214.1	5537.3	16	0.08446	0.0284262		0.810783	15.6		gb:AK061893.1 DB_XREF=gi:32971911 TID=Os.142.2 CNT=27 FEA=FLmRNA TIER=FL+Stack STK=16 UG=Os.142 UG_TITLE=(japonica cultivar-group) ferredoxin-nitrite reductase (P0025H06.10), mRNA DEF=Oryza sativa (japonica cultivar-group) cDNA clone:001-041-G06,	LOC_Os01g25484		unspliced-genomic ferredoxin--nitrite reductase, chloroplast precursor, putative, expressed		AT2G15620	0	265475_at
Os.3709.1.S1_s_at	2121.6	1657.8	2099.4	3581.9	2613.6	2763.3	2045.2	2414.7	2489.4	3615.8	22	0.02241	0.0300938		2152.5	2228.2	2632.3	4136.7	3125.7	2838.7	2193.2	2717.5	2860	3724	21.2	0.00349	0.0118509		0.944636	21.6		gb:AB026568.1 DB_XREF=gi:8671511 GEN=OsPBG1 TID=Os.3709.1 CNT=30 FEA=FLmRNA TIER=FL STK=1 UG=Os.3709 DEF=Oryza sativa (japonica cultivar-group) OsPBG1 mRNA for beta 7 subunit of 20S proteasome, complete cds. PROD=beta 7 subunit of 20S proteasome	LOC_Os09g33986		unspliced-genomic proteasome subunit beta type 4 precursor, putative, expressed		AT1G56450	1e-90	259604_at
Os.4702.1.S1_at	8234.8	8181	5641.5	5403.2	5543.9	5081.2	7498.9	9030	6096.7	5101	10.4	0.00532	0.00965557		9116.1	7527.3	5903.1	4778.2	4649.6	4799.9	7470.8	8173	5411.4	4672.6	10	0.00239	0.00299193		0.943273	10.2		gb:AK072521.1 DB_XREF=gi:32982544 TID=Os.4702.1 CNT=27 FEA=FLmRNA TIER=FL STK=1 UG=Os.4702 UG_TITLE=(japonica cultivar-group) cDNA clone:001-044-F01, full insert sequence DEF=Oryza sativa (japonica cultivar-group) cDNA clone:J023131B06, full inse	LOC_Os09g39400		unspliced-genomic histidine-containing phosphotransfer protein 1, putative, expressed		AT3G21510	5e-28	258184_at
Os.426.1.S1_at	5831.5	7430.2	12374	13791.8	11081.1	9296.1	6974.5	6415.5	12050.4	13298.3	20.4	7e-05	0.00187517		3403.4	4813.8	11440.4	13167.1	10024.8	8925.8	5796.9	6473.3	11368.2	11842.1	20.4	0.00061	0.0126693		0.970799	20.4		gb:AB054123.1 DB_XREF=gi:12246884 TID=Os.426.1 CNT=21 FEA=FLmRNA TIER=FL STK=1 UG=Os.426 DEF=Oryza sativa (japonica cultivar-group) mRNA for ribosomal protein S10, complete cds. PROD=ribosomal protein S10 FL=gb:AK102190.1 gb:AB054123.1 REP_ORG=	LOC_Os04g35090		unspliced-genomic 40S ribosomal protein S10, putative, expressed		AT5G52650	6e-42	248331_at
Os.3438.1.S1_at	1296.9	1990.3	2089.9	2399.5	1788.9	2196.1	1333.2	1619.2	1777.5	2137.7	20.4	0.08317	0.0294277		1232.7	1645.2	1727.3	2453	2090.7	2397.1	1586.2	1591.3	2234.6	2038.7	22.4	0.04541	0.0292098		0.756162	21.4		gb:AB042259.1 DB_XREF=gi:7678765 GEN=copz1 TID=Os.3438.1 CNT=23 FEA=FLmRNA TIER=FL STK=1 UG=Os.3438 DEF=Oryza sativa (japonica cultivar-group) copz1 mRNA for zeta1-COP, complete cds. PROD=zeta1-COP FL=gb:AB042259.1 gb:AK059189.1 gb:AK099044.1 g	LOC_Os05g38610		unspliced-genomic coatomer subunit zeta-1, putative, expressed		AT3G09800	1e-56	258710_s_at
Os.12735.1.S1_at	6728.3	2023.7	9054.3	30648.9	30959.8	26034.8	4585.7	631.6	5053.9	23358.5	23.6	4e-05	0.00119804		5630.6	1650.6	4755.4	28097.1	25920.5	23407.1	6448	174.8	4753.1	26331.3	23.6	7e-05	0.00211139		0.979683	23.6		gb:AK119708.1 DB_XREF=gi:37989331 TID=Os.12735.1 CNT=174 FEA=FLmRNA TIER=FL+Stack STK=8 UG=Os.12735 UG_TITLE=(japonica cultivar-group) cDNA clone:006-202-H08, full insert sequence DEF=Oryza sativa (japonica cultivar-group) cDNA clone:002-157-E08,	LOC_Os11g44810		unspliced-genomic auxin-repressed 12.5 kDa protein, putative, expressed		AT1G28330	1e-27	245668_at
Os.12735.1.S1_s_at	19298.9	9336	18981.4	29699	25942	23716.4	14805.4	3148.8	14342	24410	23.6	0.00361	0.00479666		21059.3	8229.6	14042.4	24565.9	25123.6	22760.3	19022.6	1160.4	14904	24121.4	0.4	0.00819	0.0103332		0.938885	0		gb:AK119708.1 DB_XREF=gi:37989331 TID=Os.12735.1 CNT=174 FEA=FLmRNA TIER=FL+Stack STK=8 UG=Os.12735 UG_TITLE=(japonica cultivar-group) cDNA clone:006-202-H08, full insert sequence DEF=Oryza sativa (japonica cultivar-group) cDNA clone:002-157-E08,	LOC_Os11g44810		unspliced-genomic auxin-repressed 12.5 kDa protein, putative, expressed		AT1G28330	1e-27	245668_at
Os.2294.1.S1_at	2430.6	2127.6	2152.9	2079.3	3449.7	3813.1	2936.5	2157.8	1713.8	1865.7	3.6	0.0032	0.00297797		2293.9	1739.6	1623.6	1618.1	2775.7	3543.5	2374.5	1634.3	1470.1	1888.5	3.2	0.00053	0.00326223		0.950827	3.4		gb:AF045571.1 DB_XREF=gi:4091079 TID=Os.2294.1 CNT=21 FEA=FLmRNA TIER=FL STK=1 UG=Os.2294 DEF=Oryza sativa nucleic acid binding protein mRNA, complete cds. PROD=nucleic acid binding protein FL=gb:AF045571.1 gb:AK058498.1 gb:AK058384.1 gb:AF04742	LOC_Os01g66420	Alfin-like	unspliced-genomic PHD finger protein, putative, expressed		AT5G26210	2e-84	246856_at
Os.2612.1.S1_at	223.8	300.5	167.7	297.9	612.2	2927.7	806.9	292.5	204.7	259.3	3.6	0.09416	0.0413042		228	563	128.7	239.5	510.8	2084.5	825.7	305.1	237.1	286.5	4	0.09032	0.0405631		0.982852	3.8		gb:AF309378.1 DB_XREF=gi:11177832 TID=Os.2612.1 CNT=18 FEA=FLmRNA TIER=FL STK=1 UG=Os.2612 DEF=Oryza sativa (japonica cultivar-group) clone C12112_1A putative glutathione S-transferase OsGSTU4 mRNA, complete cds. PROD=putative glutathione S-trans	LOC_Os10g38495		unspliced-genomic glutathione S-transferase GSTU6, putative, expressed		AT1G59670	3e-51	262074_at
Os.13917.1.S1_at	500.4	544.7	733.9	396	226.3	116.9	245.7	690.8	716.4	621.6	15.2	0.00176	0.00227792		244.2	1333.7	1077	550.8	322.2	231.6	297.9	1290.4	828.1	309.5	14	0.01181	0.0087613		0.669659	14.6		gb:AY181210.1 DB_XREF=gi:27902676 TID=Os.13917.1 CNT=16 FEA=FLmRNA TIER=FL STK=1 UG=Os.13917 DEF=Oryza sativa (japonica cultivar-group) cold acclimation protein COR413-TM1 mRNA, complete cds. PROD=cold acclimation protein COR413-TM1 FL=gb:AY1812	LOC_Os05g49170		unspliced-genomic cold acclimation WCOR413-like protein gamma form, putative, expressed		AT1G29395	5e-43	259789_at
Os.12405.1.S1_at	4561	5909.8	6155.9	7699.8	5285	3991.1	3781.9	6177.5	6898.7	7477.9	18	0.00085	0.00536231		3181.3	5053.7	6110.7	9425.2	5081.8	4420.7	2871.7	5590.8	6442.7	6993.5	19.2	0.00394	0.0140637		0.911949	18.6		gb:AB029059.1 DB_XREF=gi:5106370 GEN=OsIF1-1 TID=Os.12405.1 CNT=16 FEA=FLmRNA TIER=FL STK=1 UG=Os.12405 DEF=Oryza sativa (japonica cultivar-group) OsIF1-1 mRNA for F1F0-ATPase inhibitor protein, complete cds. PROD=F1F0-ATPase inhibitor protein	LOC_Os08g44460		unspliced-genomic expressed protein
Os.313.1.S1_a_at	25.8	80.9	64.8	214.4	238.4	596.2	47.3	27.2	121.2	137.4	1.6	0.08866	0.046281		134.9	161.4	23	268.2	277.9	286.5	169	33.5	49.7	184.4	1.6	0.0061	0.00814756		0.687624	1.6		gb:AB030939.1 DB_XREF=gi:8574428 GEN=Aldh2a TID=Os.313.1 CNT=15 FEA=FLmRNA TIER=FL STK=1 UG=Os.313 DEF=Oryza sativa (japonica cultivar-group) mRNA for mitochondrial aldehyde dehydrogenase ALDH2a, complete cds. PROD=mitochondrial aldehyde dehydro	LOC_Os02g49720		unspliced-genomic aldehyde dehydrogenase, mitochondrial precursor, putative, expressed		AT1G23800	0	265188_at
Os.5562.1.S1_at	1343	1809.7	1384.2	1740.3	1098.6	1254.9	1095.9	2890.6	2614.2	1514.4	14.4	0.10671	0.0428816		632.3	2544.4	1695.9	1428.9	1089.4	845.1	881	2863.8	3197.8	1387.5	14.8	0.02475	0.0161483		0.89406	14.6		gb:AB007452.1 DB_XREF=gi:6467125 GEN=Aox1(Ao1-1) TID=Os.5562.1 CNT=25 FEA=FLmRNA TIER=FL STK=1 UG=Os.5562 DEF=Oryza sativa mRNA for alternative oxidase, complete cds. PROD=alternative oxidase FL=gb:AB004864.1 gb:AK064040.1 gb:AB007452.1 REP_OR	LOC_Os04g51150		unspliced-genomic transposon protein, putative, unclassified, expressed		AT3G22370	4e-130	258452_at
Os.12193.1.S1_at	4351.9	4423.4	4442.3	4176.4	3763.7	3672.7	3306.3	5339.1	5118	4931.4	15.6	0.05595	0.0295213		3436.4	4406.7	4802.8	4979.2	3703.2	3451.7	3387.3	5351.2	5160.4	4783.4	16.4	0.00204	0.00588521		0.829661	16		gb:D37886.1 DB_XREF=gi:529093 TID=Os.12193.1 CNT=19 FEA=FLmRNA TIER=FL STK=1 UG=Os.12193 DEF=Rice mRNA for proteasome C2 subunit, complete cds. PROD=proteasome C2 subunit FL=gb:AK109376.2 gb:D37886.1 gb:AK103646.1 gb:AK059589.1 REP_ORG=O. sativ	LOC_Os02g04100		unspliced-genomic proteasome subunit alpha type 1, putative, expressed		AT5G42790	4e-103	249161_at
Os.3924.1.S1_at	2997.3	2361.9	2299.5	2373.1	2409.7	2534.6	2914.9	2825.3	2498.9	1943.6	8	0.01833	0.00670783		2711	1911.1	2312.1	2284.5	2218.2	2517.4	2670.7	2437.7	2235.9	1874.8	6.4	0.10948	0.0297091		0.872045	7.2		gb:AB111915.1 DB_XREF=gi:40714350 GEN=OsRPA14 TID=Os.3924.1 CNT=15 FEA=FLmRNA TIER=FL STK=1 UG=Os.3924 DEF=Oryza sativa (japonica cultivar-group) OsRPA14 mRNA for replication protein A 14kDa, complete cds. PROD=replication protein A 14kDa FL=gb	LOC_Os01g14980		unspliced-genomic pollen-specific protein like, putative, expressed		AT4G18590	9e-29	254620_at
Os.8971.1.S1_at	436.1	1011	371.8	91.2	83.6	48.7	106.1	1013.1	410.9	99.7	12.4	0.01876	0.0217296		457.7	1190.4	212.6	51.6	58.1	50.2	87.6	838.5	266.4	58.9	12	0.04866	0.0337314		0.964673	12.2		gb:AF332981.1 DB_XREF=gi:18033449 GEN=HSP101 TID=Os.8971.1 CNT=24 FEA=FLmRNA TIER=FL STK=1 UG=Os.8971 DEF=Oryza sativa heat shock protein (HSP101) mRNA, complete cds. PROD=heat shock protein FL=gb:AK105433.1 gb:AK100903.1 gb:AK121414.1 gb:AF332	LOC_Os05g44340		unspliced-genomic heat shock protein 101, putative, expressed		AT1G74310	0	260248_at
Os.12345.1.S1_s_at	71.2	25.4	45.3	54.4	191.8	213.5	94.9	98.2	50.6	82.6	2.4	0.0117	0.00631899		62.1	48.4	30.7	52.2	105.5	173.5	82.2	129.9	58.2	50.1	4	0.13175	0.0408816		0.851036	3.2		gb:AB114830.1 DB_XREF=gi:32879773 GEN=OsTIP2 TID=Os.12345.1 CNT=19 FEA=FLmRNA TIER=FL STK=1 UG=Os.12345 DEF=Oryza sativa (japonica cultivar-group) OsTIP2 mRNA for tonoplast intrinsic protein, complete cds. PROD=tonoplast intrinsic protein FL=gb	LOC_Os02g44080		unspliced-genomic aquaporin TIP2.1, putative, expressed		AT5G47450	3e-103	248790_at
Os.13835.2.S3_a_at	715	1115.6	2717.5	1370.9	993.8	796.3	416.5	1403	2469.2	1754.4	16.8	0.00518	0.0137315		816.6	1490.7	2812.5	2116.6	960.7	687	383.5	1589.1	2943.8	2262.9	17.2	0.00013	0.00280137		0.958727	17		gb:AK105151.1 DB_XREF=gi:32990360 TID=Os.13835.2 CNT=11 FEA=FLmRNA TIER=ConsEnd STK=0 UG=Os.13835 UG_TITLE=(japonica cultivar-group) putative choline kinase (P0683B11.15), mRNA DEF=Oryza sativa (japonica cultivar-group) cDNA clone:001-103-E05, fu	LOC_Os01g51920		unspliced-genomic choline/ethanolamine kinase, putative, expressed		AT1G74320	8e-126	260244_at
Os.10941.1.S1_at	584.5	413	174.8	255.1	225.3	225.1	604.3	287	153.6	141	8	0.02147	0.0283395		467.8	356.5	160.8	153.9	145.9	220.8	444.2	237.2	170.5	138	8.4	0.00414	0.0103397		0.968095	8.2		gb:L34271.1 DB_XREF=gi:508576 GEN=MADS1 TID=Os.10941.1 CNT=18 FEA=FLmRNA TIER=FL STK=1 UG=Os.10941 DEF=Oryza sativa box protein (MADS1) mRNA, complete cds. PROD=box protein FL=gb:L34271.1 gb:AK070981.1 gb:AK069728.1 REP_ORG=O. sativa	LOC_Os03g11614	MADS	unspliced-genomic MADS-box transcription factor 1, putative, expressed		AT5G15800	4e-60	246531_at
Os.7475.1.S1_at	26061.2	46054.2	29026.8	1251.1	1011.7	405.7	3861.8	48064.5	30260.7	2029.6	12.8	0.00348	0.00767653		27693.5	44749.4	37690.7	985.8	411	247.7	2195.3	40894.6	26699.4	1236.1	12.8	0.0045	0.00535759		0.978215	12.8		gb:AB114829.1 DB_XREF=gi:32879771 GEN=OsTIP1 TID=Os.7475.1 CNT=17 FEA=FLmRNA TIER=FL STK=1 UG=Os.7475 DEF=Oryza sativa (japonica cultivar-group) OsTIP1 mRNA for tonoplast intrinsic protein, complete cds. PROD=tonoplast intrinsic protein FL=gb:A	LOC_Os01g74450		unspliced-genomic aquaporin TIP1.2, putative, expressed		AT4G01470	3e-103	255580_at
Os.163.1.S1_at	1726.4	2750.2	4545.6	4523.4	3075	2848.6	1133.8	2487.6	4768.6	5229.2	19.2	0.00035	0.00240743		740	1662.6	3924.5	4552.8	2434.6	2403.1	783.3	2476.3	4355.7	4340.1	19.2	0.00034	0.00509561		0.965438	19.2		gb:D38011.1 DB_XREF=gi:971283 TID=Os.163.1 CNT=15 FEA=FLmRNA TIER=FL STK=1 UG=Os.163 DEF=Oryza sativa (japonica cultivar-group) mRNA for ribosomal protein S31, complete cds. PROD=ribosomal protein S31 FL=gb:D38011.1 REP_ORG=O. sativa	LOC_Os01g60790		unspliced-genomic 40S ribosomal protein S26, putative, expressed		AT3G56340	2e-28	251737_at
Os.7678.1.S1_at	49.4	55.6	11.1	60.4	133.4	278.3	145.3	75.4	11	8.7	4	0.01565	0.00544565		50.3	5.1	7.4	27	178.6	122.7	124	11.3	9.3	42.2	2.8	0.0036	0.00438172		0.73044	3.4		gb:AY310358.1 DB_XREF=gi:32351268 TID=Os.7678.1 CNT=14 FEA=FLmRNA TIER=FL STK=1 UG=Os.7678 DEF=Oryza sativa (japonica cultivar-group) allene oxide synthase mRNA, complete cds. PROD=allene oxide synthase FL=gb:AY055775.1 gb:AY310358.1 gb:AK061758	LOC_Os03g12500		unspliced-genomic cytochrome P450 74A2, putative, expressed		AT5G42650	2e-123	249208_at
Os.12176.1.S1_at	379.6	441.6	951	3225.2	3964.3	2993.5	645.2	268.3	605.3	3835.7	23.6	5e-05	0.00366569		374	352.4	742.3	3878.6	3924.5	2789.9	626.5	199.9	755.4	6406.7	22.8	0.00335	0.0101547		0.941942	23.2		gb:U25284.2 DB_XREF=gi:7249266 TID=Os.12176.1 CNT=14 FEA=FLmRNA TIER=FL STK=1 UG=Os.12176 DEF=Oryza sativa clone OSE3 leucine zipper protein mRNA, complete cds. PROD=leucine zipper protein FL=gb:U25284.2 gb:AK121297.1 REP_ORG=O. sativa	LOC_Os03g07590		unspliced-genomic expressed protein
Os.11758.1.S1_at	2225.1	2864.6	2892.5	3040.5	2777.9	2704	2172.7	2579.4	2813.5	2940.2	19.2	0.00959	0.00817461		2216.8	2784.3	2959.6	3033.7	2555.1	2313.6	2139.4	2716.9	3186.1	3109.2	17.6	3e-05	0.00153302		0.835525	18.4		gb:AB114831.1 DB_XREF=gi:32879775 GEN=srp54-1 TID=Os.11758.1 CNT=19 FEA=FLmRNA TIER=FL STK=1 UG=Os.11758 DEF=Oryza sativa (japonica cultivar-group) srp54-1 mRNA for signal recognition particle 54kDa subunit, complete cds. PROD=signal recognition	LOC_Os01g56600		unspliced-genomic signal recognition particle 54 kDa protein 2, putative, expressed		AT1G48900	0	246628_at
Os.1322.1.S1_at	5815.2	6563.9	5258.1	4664.4	4324.2	3922.7	4151.4	7055.1	5461.7	4769.1	12.8	0.02422	0.0176736		5626	7172.2	5359.5	4623.7	4459.5	3705.3	4278.1	7458.7	5369.2	5055.1	13.2	0.02956	0.0216587		0.983291	13		gb:AF016897.1 DB_XREF=gi:2384759 GEN=OsGDI2 TID=Os.1322.1 CNT=18 FEA=FLmRNA TIER=FL STK=1 UG=Os.1322 DEF=Oryza sativa GDP dissociation inhibitor protein OsGDI2 (OsGDI2) mRNA, complete cds. PROD=GDP dissociation inhibitor protein OsGDI2 FL=gb:AK	LOC_Os05g23860		unspliced-genomic rab GDP dissociation inhibitor alpha, putative, expressed		AT2G44100	0	267236_at
Os.3700.1.S1_at	1043.9	1159.3	1519.8	1993.7	2104.7	1592.9	1408.6	1039.3	1330.2	2084	22.8	0.00011	0.00163577		685.3	937.9	1182.6	1744.4	1657.7	1691.8	1225.1	934.3	1184.9	1864.3	23.2	0.00234	0.00182654		0.931057	23		gb:AF458088.1 DB_XREF=gi:18087496 TID=Os.3700.1 CNT=17 FEA=FLmRNA TIER=FL STK=1 UG=Os.3700 DEF=Oryza sativa methylthioadenosineS-adenosyl homocysteine nucleosidase mRNA, complete cds. PROD=methylthioadenosineS-adenosyl homocysteinenucleosidase F	LOC_Os06g02220		unspliced-genomic MTA/SAH nucleosidase, putative, expressed		AT4G38800	1e-86	252974_at
Os.4694.1.S1_at	563.1	526.3	1627.9	2100.2	2160.5	1705	1141.1	640.2	1518.8	1947.1	22.4	0.0003	0.00144686		342	584.3	1490.6	2171.9	2056.7	2095.2	832.3	682	1445.2	2007.4	22.4	0.0006	0.00154447		0.963672	22.4		gb:AF372833.1 DB_XREF=gi:13991928 TID=Os.4694.1 CNT=16 FEA=FLmRNA TIER=FL STK=1 UG=Os.4694 DEF=Oryza sativa phosphoenolpyruvatephosphate translocator mRNA, complete cds. PROD=phosphoenolpyruvatephosphate translocator FL=gb:AF372833.1 gb:AK071036	LOC_Os09g12600		unspliced-genomic triose phosphate/phosphate translocator, non-green plastid,chloroplast precursor, putative, expressed		AT5G33320	5e-137	264419_s_at
Os.10034.1.S1_at	1250.1	2700.5	2022.7	1440.8	1330.1	1081.5	1273.6	2505.7	2426.7	1988.5	14.4	0.00741	0.0094513		1217.2	3231.7	2209.1	1598.1	1324.3	1149.7	1258	2745.9	2942.4	1855.1	14.4	0.00829	0.011137		0.981152	14.4		gb:AF187062.1 DB_XREF=gi:6683810 GEN=ura6 TID=Os.10034.1 CNT=16 FEA=FLmRNA TIER=FL STK=1 UG=Os.10034 DEF=Oryza sativa UMPCMP kinase a (ura6) mRNA, complete cds. PROD=UMPCMP kinase a FL=gb:AF187063.1 gb:AF187062.1 gb:AK072973.1 REP_ORG=O. sativ	LOC_Os07g43170		unspliced-genomic UMP-CMP kinase family protein, expressed		AT5G26667	4e-86
Os.12721.1.S1_at	2403.7	2617	2905.9	2583.8	2466.5	1570.3	1868.4	2552.3	3150.7	3046.1	16.8	0.00328	0.00347575		2487.5	2413.6	2821.1	2528.4	2291.7	1609.8	1810.8	2690.1	2424.9	2889.6	16.8	0.03866	0.0167955		0.873385	16.8		gb:AB028887.1 DB_XREF=gi:6015431 GEN=OSEya1 TID=Os.12721.1 CNT=13 FEA=FLmRNA TIER=FL STK=1 UG=Os.12721 DEF=Oryza sativa OSEya1 mRNA for OSEYA1, complete cds. PROD=OSEYA1 FL=gb:AB028887.1 gb:AK068889.1 gb:AK099255.1 REP_ORG=O. sativa	LOC_Os06g02028		unspliced-genomic eyes absent homolog 4, putative, expressed		AT2G35320	1e-93	266547_at
Os.12212.1.S1_at	279.4	141.5	136.5	107.6	220.2	183.9	281.4	278.6	140.6	148.8	6.8	0.04056	0.0154516		352.1	160.8	157.3	100.4	143.9	140.2	338.3	278.1	102.4	117.6	8.4	0.0174	0.0158742		0.896915	7.6		gb:AY335486.1 DB_XREF=gi:33151122 TID=Os.12212.1 CNT=11 FEA=FLmRNA TIER=FL STK=1 UG=Os.12212 DEF=Oryza sativa (japonica cultivar-group) drought-induced protein DI1 mRNA, complete cds. PROD=drought-induced protein DI1 FL=gb:AK121060.1 gb:AY335486	LOC_Os05g01730		unspliced-genomic fb2, putative, expressed		AT5G26990	6e-12	246824_at
Os.2348.1.S1_a_at	5367.8	3209.4	2887.6	2420	3690.9	3990.3	4613.9	3419.2	2485	2836.7	6	0.00188	0.0212667		6656.5	3949.6	2679	2631	4912.3	5402	6058	2762.7	1960.7	3469.7	4.8	0.00123	0.00465068		0.934498	5.4		gb:AY332478.1 DB_XREF=gi:33242920 GEN=AGL10 TID=Os.2348.1 CNT=10 FEA=FLmRNA TIER=FL STK=1 UG=Os.2348 DEF=Oryza sativa (japonica cultivar-group) MADS box protein (AGL10) mRNA, complete cds. PROD=MADS box protein FL=gb:AY332478.1 gb:AF139664.2 gb	LOC_Os03g54160	MADS	unspliced-genomic MADS-box transcription factor 14, putative, expressed		AT1G69120	2e-59	259372_at
Os.2348.1.S1_at	12128.3	9185.8	5222.2	6284.2	9168.3	8419.4	11808.5	8537	4547.8	5652.7	6.4	0.0026	0.0100244		14089.5	8439.4	5081.7	5522.1	8927.3	8452.8	11252.7	6614	5067.3	6529.1	6	0.01007	0.0229051		0.932384	6.2		gb:AY332478.1 DB_XREF=gi:33242920 GEN=AGL10 TID=Os.2348.1 CNT=10 FEA=FLmRNA TIER=FL STK=1 UG=Os.2348 DEF=Oryza sativa (japonica cultivar-group) MADS box protein (AGL10) mRNA, complete cds. PROD=MADS box protein FL=gb:AY332478.1 gb:AF139664.2 gb	LOC_Os03g54160	MADS	unspliced-genomic MADS-box transcription factor 14, putative, expressed		AT1G69120	2e-59	259372_at
Os.9145.1.S1_at	424.5	197.7	126.3	32.6	63.4	134.6	399.6	245.2	163.7	90.6	8.8	0.00516	0.00590483		254.9	264.1	96.3	47.6	91.4	116.5	282.7	292.2	92.8	10.2	9.2	0.00024	0.0130633		0.822844	9		gb:AY435404.1 DB_XREF=gi:37694730 TID=Os.9145.1 CNT=14 FEA=FLmRNA TIER=FL STK=1 UG=Os.9145 DEF=Oryza sativa (japonica cultivar-group) NADP malic enzyme mRNA, complete cds. PROD=NADP malic enzyme FL=gb:AY435404.1 gb:AK099249.1 gb:AK070360.1 gb:AK	LOC_Os05g09440		unspliced-genomic NADP-dependent malic enzyme, chloroplast precursor, putative, expressed		AT5G25880	0	246915_at
Os.9492.1.S1_a_at	15.6	101.5	112.1	204.2	141.7	100.4	35.9	105.3	208.5	136.9	19.2	0.0109	0.0266063		8.1	123.4	84.4	233.9	119.8	46	15.8	101.5	156.8	220.6	19.2	0.00468	0.0110533		0.846628	19.2		gb:AB028180.1 DB_XREF=gi:27529807 GEN=OsNAC1 TID=Os.9492.1 CNT=14 FEA=FLmRNA TIER=FL STK=1 UG=Os.9492 DEF=Oryza sativa mRNA for OsNAC1 protein, complete cds. PROD=OsNAC1 protein FL=gb:AB028180.1 REP_ORG=O. sativa	LOC_Os02g36880	NAC	unspliced-genomic NAC domain protein NAC5, putative, expressed		AT5G61430	3e-67	247519_at
Os.4685.1.S1_at	118	88.4	155	144.1	135.5	125.1	97.3	68.6	113.2	190.4	22	0.02786	0.0352269		60.8	53.4	97.7	131.9	104	115	39.1	70.8	121.8	183.1	21.2	0.00588	0.023111		0.80684	21.6		gb:AB037900.1 DB_XREF=gi:9188571 GEN=OspolD2 TID=Os.4685.1 CNT=12 FEA=FLmRNA TIER=FL STK=1 UG=Os.4685 DEF=Oryza sativa (japonica cultivar-group) OspolD2 mRNA for OsPol delta small subunit, complete cds. PROD=OsPol delta small subunit FL=gb:AB03	LOC_Os03g03650		unspliced-genomic DNA polymerase delta small subunit, putative, expressed		AT2G42120	0	267629_at
Os.21635.1.S1_at	4632.7	3840.8	582.9	143.3	482.9	640.1	5895.8	3063.8	535	186.9	8.8	0.00401	0.0128011		7993.5	6814.5	646.1	170	713	822.7	5874.3	5190.7	642.8	142.8	9.2	0.00346	0.00548663		0.93814	9		gb:AF543419.1 DB_XREF=gi:23452822 GEN=mfs2 TID=Os.21635.1 CNT=12 FEA=FLmRNA TIER=FL STK=1 UG=Os.21635 DEF=Oryza sativa (japonica cultivar-group) major facilitator superfamily antiporter (mfs2) mRNA, complete cds. PROD=major facilitator superfami	LOC_Os12g03860		unspliced-genomic major facilitator superfamily antiporter, putative, expressed		AT5G13750	1e-147	250252_at
Os.162.1.S1_at	856.1	665.7	540.3	481.3	515.2	404.8	498.9	851	589	433.3	11.2	0.08619	0.0293032		754.2	830.9	441.5	585.9	424	451.3	527.6	834.2	508.8	406.6	11.2	0.06197	0.0381094		0.843784	11.2		gb:D13152.1 DB_XREF=gi:218203 GEN=rgp2 TID=Os.162.1 CNT=11 FEA=FLmRNA TIER=FL STK=1 UG=Os.162 DEF=Oryza sativa (japonica cultivar-group) rgp2 mRNA for GTP binding protein, complete cds. PROD=GTP binding protein FL=gb:D13152.1 REP_ORG=O. sativa	LOC_Os05g20050		unspliced-genomic ras-related protein RGP2, putative, expressed		AT3G46830	6e-87	252472_at
Os.9955.1.S1_a_at	4047.6	5746.1	4437.2	3971.4	4088.1	3956.4	3672.7	5200.8	4899.3	4175.7	13.6	0.06786	0.0437014		4326.9	5758.4	4662.7	3460.2	3043.9	3453.4	3490	5264.3	5082.4	3486	13.2	0.00195	0.00475321		0.904472	13.4		gb:AK068737.1 DB_XREF=gi:32978756 TID=Os.9955.1 CNT=9 FEA=FLmRNA TIER=FL STK=1 UG=Os.9955 UG_TITLE=(japonica cultivar-group) unnamed protein product (Gene), mRNA DEF=Oryza sativa (japonica cultivar-group) cDNA clone:J013158B10, full insert sequen	LOC_Os01g14860		unspliced-genomic glycogen synthase kinase-3 homolog MsK-3, putative, expressed		AT3G05840	0	258743_s_at
Os.8868.1.S1_at	2170.2	4470.4	944.1	232.4	143.2	569.5	1790.9	7606.9	2325.8	317.8	11.6	0.03189	0.024952		2501.1	7847.4	2686.1	191.2	176	394.5	1754.2	8018.5	2905.9	472.8	12.4	0.01073	0.0155083		0.937431	12		gb:AF402795.1 DB_XREF=gi:15430712 TID=Os.8868.1 CNT=9 FEA=FLmRNA TIER=FL STK=1 UG=Os.8868 DEF=Oryza sativa (japonica cultivar-group) clone C10976_1A putative glutathione S-transferase OsGSTU8 mRNA, complete cds. PROD=putative glutathione S-transf	LOC_Os10g38610		unspliced-genomic glutathione S-transferase GSTU6, putative, expressed		AT1G10360	7e-52	264435_at
Os.10334.1.S1_at	3739.2	3401.9	3002	2881.5	3372.1	3446.8	3307.5	3935	3178.9	2842	8	0.03662	0.0178055		3375.5	2864.7	2649.3	2263.7	2809.4	3006	3057.8	3261.3	2241.7	2451	7.2	0.0041	0.0114431		0.863689	7.6		gb:AB125309.1 DB_XREF=gi:46917343 GEN=SAPK8 TID=Os.10334.1 CNT=12 FEA=FLmRNA TIER=FL STK=1 UG=Os.10334 DEF=Oryza sativa (japonica cultivar-group) SAPK8 mRNA for serinethreonine protein kinase SAPK8, complete cds. PROD=serinethreonine protein kin	LOC_Os03g55600		unspliced-genomic serine/threonine-protein kinase SAPK8, putative, expressed		AT4G33950	8e-161	253264_at
Os.2344.1.S1_at	50.5	77.6	100.5	122.7	85	63.8	51	82.1	69.8	164.5	20	0.02059	0.0183183		38.7	27.7	64	104.6	66.5	90.1	53.9	64.5	68.3	100.7	22	0.03361	0.023747		0.666457	21		gb:AF193345.1 DB_XREF=gi:6319145 TID=Os.2344.1 CNT=11 FEA=FLmRNA TIER=FL STK=1 UG=Os.2344 DEF=Oryza sativa H2A protein mRNA, complete cds. PROD=H2A protein FL=gb:AF193345.1 gb:AK121515.1 REP_ORG=O. sativa	LOC_Os10g28230		unspliced-genomic histone H2A variant 2, putative, expressed		AT3G54560	4e-53	251846_at
Os.9074.1.S1_s_at	5838.1	8114.8	11599.3	11924.2	12753.2	9912.7	9185.6	4305.4	7884.4	11335.1	22.4	0.0178	0.00402915		3445.5	5748.9	7628.6	10144.2	9847.9	8869.4	8354.6	5189.2	7647.3	9413.3	22.8	0.0145	0.00280137		0.866273	22.6		gb:AK059982.1 DB_XREF=gi:32970000 TID=Os.9074.1 CNT=9 FEA=FLmRNA TIER=FL STK=1 UG=Os.9074 UG_TITLE=(japonica cultivar-group) Putative nascent polypeptide associated complex alpha chain (OJ1705B08.10), mRNA DEF=Oryza sativa (japonica cultivar-grou	LOC_Os03g02970		unspliced-genomic endoribonuclease Dicer, putative, expressed		AT1G01040	0	261584_at
Os.8188.1.S1_s_at	331	459.9	346.3	487	1204.8	1341	380.7	173	198.8	955.8	1.2	0.00628	0.0106531		338.6	524.4	319.5	1226.2	807.6	1247.2	488.1	155.1	237.3	910	0.4	0.02154	0.0176375		0.764414	0.8		gb:AF491815.1 DB_XREF=gi:20067186 GEN=Usp1 TID=Os.8188.1 CNT=8 FEA=FLmRNA TIER=FL STK=1 UG=Os.8188 DEF=Oryza sativa (indica cultivar-group) putative universal stress protein USP1 (Usp1) mRNA, complete cds. PROD=putative universal stress protein	LOC_Os07g47630		unspliced-genomic pre-mRNA-splicing factor SF2, putative, expressed		AT1G09140	3e-72	264255_at
Os.20289.1.S1_at	163.4	85.5	87.9	355.6	376.5	286.4	172.8	95.5	92.1	136.8	1.2	0.00646	0.00332125		104.9	38.8	52.6	545.4	311	289.8	240.7	95	220.4	267.2	23.6	0.04458	0.0313109		0.804677	0.4		gb:AY435041.1 DB_XREF=gi:38018634 GEN=PR-4b TID=Os.20289.1 CNT=8 FEA=FLmRNA TIER=FL STK=1 UG=Os.20289 DEF=Oryza sativa (indica cultivar-group) pathogenesis-related protein 4b (PR-4b) mRNA, complete cds. PROD=pathogenesis-related protein 4b FL=g	LOC_Os11g37960		unspliced-genomic win2 precursor, putative, expressed		AT3G04720	9e-52	258791_at
Os.4700.1.S1_at	240.3	119.8	187.2	69.7	103	65.6	197.3	242.9	135.9	103.4	10.8	0.05898	0.0356171		374.3	259.5	181.5	115.9	105.3	88	248.7	313.1	159.8	125.8	10.4	0.00958	0.00489882		0.875511	10.6		gb:AY324877.1 DB_XREF=gi:34538926 TID=Os.4700.1 CNT=11 FEA=FLmRNA TIER=FL STK=1 UG=Os.4700 DEF=Oryza sativa (japonica cultivar-group) putative NaH antiporter mRNA, complete cds. PROD=putative NaH antiporter FL=gb:AK064004.1 gb:AB021878.1 gb:AK09	LOC_Os07g47100		unspliced-genomic sodium/hydrogen exchanger 2, putative, expressed		AT3G05030	0	259081_at
Os.6787.1.S1_at	3590	2457.6	1951.5	2340.6	2962.1	3887	3661.7	2785.3	1843.7	2740.5	4.8	9e-05	0.00254298		3684.7	2517.4	2372.4	2618.1	3507.6	3350.6	3382	2776.4	2263	2782.5	4	0.00071	0.0137497		0.901174	4.4		gb:AF464904.1 DB_XREF=gi:18481623 GEN=DrAp1 TID=Os.6787.1 CNT=11 FEA=FLmRNA TIER=FL STK=1 UG=Os.6787 DEF=Oryza sativa repressor protein (DrAp1) mRNA, complete cds. PROD=repressor protein FL=gb:AF464904.1 gb:AK072844.1 REP_ORG=O. sativa	LOC_Os11g34200	CCAAT_HAP5	unspliced-genomic repressor protein, putative, expressed		AT3G12480	5e-41	256258_at
Os.4078.1.S1_at	2613.5	1816.7	1100.5	1086.9	976.6	1479.9	2579.4	2448.9	1384.2	1530.1	9.2	0.00977	0.00589961		2255.2	2193	1281.6	1252.3	972.3	1275.3	2530.8	2580.5	955.6	907.3	9.6	0.00333	0.0126732		0.888185	9.4		gb:AF375053.1 DB_XREF=gi:14150752 TID=Os.4078.1 CNT=11 FEA=FLmRNA TIER=FL STK=1 UG=Os.4078 DEF=Oryza sativa glucose-6-phosphatephosphate translocator mRNA, complete cds. PROD=glucose-6-phosphatephosphate translocator FL=gb:AK060577.1 gb:AF375053	LOC_Os08g08840		unspliced-genomic glucose-6-phosphate/phosphate translocator 2, chloroplast precursor, putative, expressed		AT1G61800	8e-153	264400_at
Os.12281.1.S1_at	3197.8	3417	2755.6	2342.3	2241.3	2788	2459.2	2508.2	2170	2113.9	9.2	0.12389	0.0449616		2663	3744	2358.5	2240.5	2377.5	3622.6	3170	2924.8	1961.7	1586.8	7.6	0.04055	0.0396732		0.708037	8.4		gb:D49714.1 DB_XREF=gi:2081611 GEN=OSP5CS TID=Os.12281.1 CNT=10 FEA=FLmRNA TIER=FL STK=1 UG=Os.12281 DEF=Oryza sativa mRNA for deltal-pyrroline-5-carboxylate synthetase, complete cds. PROD=deltal-pyrroline-5-carboxylate synthetase FL=gb:AK10263	LOC_Os05g38150		unspliced-genomic delta 1-pyrroline-5-carboxylate synthetase, putative, expressed		AT2G39800	0	251775_s_at
Os.7523.1.S1_at	762.3	833.8	770.1	535.1	465.4	226.6	545.2	1240.1	919.2	589.4	13.6	0.00888	0.0115815		580.3	726.1	615.4	380	327.7	265.6	526.2	961.9	607.8	370.2	12.4	0.00184	0.00544099		0.944233	13		gb:AB079636.1 DB_XREF=gi:18700442 GEN=OsHMGB2 TID=Os.7523.1 CNT=8 FEA=FLmRNA TIER=FL STK=1 UG=Os.7523 DEF=Oryza sativa (japonica cultivar-group) OsHMGB2 mRNA for high mobility group box protein 2, complete cds. PROD=high mobility group box prote	LOC_Os02g44930	HMG	unspliced-genomic HMG1/2-like protein, putative, expressed		AT1G20696	2e-16	256092_at
Os.11814.1.S1_at	973.4	1525.2	1214.4	896	596.2	386.3	506.6	1485.7	1053.5	465	13.6	0.0117	0.00720868		659.7	1123.5	1114.6	998.5	364.5	470	574.5	1096.9	937.3	505.3	14.4	0.00483	0.00184562		0.897698	14		gb:AK105178.1 DB_XREF=gi:32990387 TID=Os.11814.1 CNT=7 FEA=FLmRNA TIER=FL STK=1 UG=Os.11814 UG_TITLE=(japonica cultivar-group) cDNA clone:001-105-C08, full insert sequence DEF=Oryza sativa (japonica cultivar-group) cDNA clone:001-105-C08, full in	LOC_Os03g50880		unspliced-genomic anthranilate synthase component II, putative, expressed		AT5G57890	5e-97	247864_s_at
Os.2244.1.S1_s_at	2735.6	1178.5	2632.6	3335.3	4119.3	3293.7	3050.5	758.9	1831.7	4788	0	0.00731	0.027902		1874.6	676.2	1614.3	3975.8	3961.8	3216.5	3380	748.5	2172	4734.5	0	0.0057	0.0108366		0.929244	0		gb:AF095709.1 DB_XREF=gi:3777601 GEN=rpl10 TID=Os.2244.1 CNT=7 FEA=FLmRNA TIER=FL STK=1 UG=Os.2244 DEF=Oryza sativa clone LS195 50S ribosomal protein L10 (rpl10) mRNA, nuclear gene encoding chloroplast protein, complete cds. PROD=50S ribosomal p	LOC_Os03g17580		unspliced-genomic 50S ribosomal protein L10, putative, expressed		AT5G13510	6e-71	245852_at
Os.1148.1.S1_at	3299.5	2252.2	5574	5561.1	6454.7	5424.4	5011.8	1705.4	4589.7	8849.5	22.8	0.01524	0.0326509		2282.9	1855.4	4163.3	7860.6	6800.6	5131.5	6002.8	2304.5	4844.1	8552.7	22.8	0.00897	0.00979585		0.894679	22.8		gb:AB042934.1 DB_XREF=gi:12583658 TID=Os.1148.1 CNT=7 FEA=FLmRNA TIER=FL STK=1 UG=Os.1148 DEF=Oryza sativa (japonica cultivar-group) mRNA for plastid ribosomal protein L11, complete cds. PROD=plastid ribosomal protein L11 FL=gb:AB042934.1 gb:AK0	LOC_Os03g03020		unspliced-genomic 50S ribosomal protein L11, chloroplast precursor, putative, expressed		AT1G32990	5e-67	261190_at
Os.292.1.S1_a_at	1848.6	2924.5	5281.4	4898.1	2956.6	2927.3	1772.8	3203.8	5141.2	5596.3	18.4	0.00035	0.00261251		1559.3	2822.3	5499.7	5195.6	2885	2726.8	1630.2	3465.1	5409.4	5340	18.4	0.00015	0.00359514		0.991689	18.4		gb:AB033536.1 DB_XREF=gi:11094191 GEN=OsRPT4 TID=Os.292.1 CNT=6 FEA=FLmRNA TIER=FL STK=1 UG=Os.292 DEF=Oryza sativa (japonica cultivar-group) OsRPT4 mRNA for 26S proteasome regulatory particle triple-A ATPase subunit4, complete cds. PROD=26S pro	LOC_Os02g10640		unspliced-genomic 26S protease regulatory subunit S10B, putative, expressed		AT1G45000	0	260940_at
Os.20496.2.S1_a_at	528.3	652.7	852.8	669.9	497.2	478.1	507.4	714.6	776.8	477.8	15.2	0.0097	0.00322154		436.8	813.7	855.1	602.3	447.9	568.7	491.5	794.1	967.3	660.4	15.2	0.00578	0.00860585		0.821869	15.2		gb:AY569035.1 DB_XREF=gi:45738201 TID=Os.20496.2 CNT=2 FEA=FLmRNA TIER=FL STK=1 UG=Os.20496 DEF=Oryza sativa (japonica cultivar-group) barley B recombinant like-protein A mRNA, complete cds. PROD=barley B recombinant like-protein A FL=gb:AY56903	LOC_Os10g02584	BBR/BPC	unspliced-genomic GAGA-binding protein, putative, expressed		AT1G14685	1e-49	262848_at
Os.12209.1.S1_a_at	170.7	155.2	265.3	65.9	99.5	29.9	118.5	298.8	196.9	87.7	13.2	0.02218	0.0226548		136.7	326.7	216.2	58	84.2	67.5	94.5	274.8	149.8	85.3	12.8	0.01442	0.0153006		0.740105	13		gb:AB029508.1 DB_XREF=gi:5902925 GEN=OsRac1 TID=Os.12209.1 CNT=6 FEA=FLmRNA TIER=FL STK=1 UG=Os.12209 DEF=Oryza sativa mRNA for small GTP-binding protein OsRac1, complete cds. PROD=small GTP-binding protein OsRac1 FL=gb:AB029508.1 REP_ORG=O. s	LOC_Os01g12900		unspliced-genomic rac-like GTP-binding protein 2, putative, expressed		AT5G62880	5e-68	247405_at
Os.7385.2.S1_a_at	6077.9	4054.8	3300.4	5111	6287.3	6291.6	5032.2	4475.7	3584.6	4319.1	3.2	0.0005	0.00396969		5086.5	3963.6	3358.7	4297.2	4876.3	5462.7	4590	4056	3756.1	4384.5	3.6	0.00017	0.00170774		0.948278	3.4		gb:AK062139.1 DB_XREF=gi:32972157 TID=Os.7385.2 CNT=19 FEA=FLmRNA TIER=FL+Stack STK=6 UG=Os.7385 UG_TITLE=(japonica cultivar-group) AAA-ATPase-like protein mRNA, complete cds DEF=Oryza sativa (japonica cultivar-group) cDNA clone:001-045-F12, full	LOC_Os01g04814		unspliced-genomic vacuolar sorting protein 4b, putative, expressed		AT2G27600	0	266260_at
Os.3737.1.S1_at	2178.3	2632.4	2858.2	3018.9	2361.7	2554.3	2247.3	3152.7	2955	2487.3	16	0.08175	0.0185939		2259.3	2462	3106.3	3405.4	2697.5	2378.5	2734.3	3296.1	3515.9	3069	17.2	0.02278	0.0163985		0.787777	16.6		gb:AB032061.1 DB_XREF=gi:9186905 GEN=OsPAD1 TID=Os.3737.1 CNT=7 FEA=FLmRNA TIER=FL STK=1 UG=Os.3737 DEF=Oryza sativa (japonica cultivar-group) OsPAD1 mRNA for alpha 4 subunit of 20S proteasome, complete cds. PROD=alpha 4 subunit of 20S proteasom	LOC_Os09g36710		unspliced-genomic proteasome subunit alpha type 7, putative, expressed		AT5G66140	2e-113	247080_at
Os.12724.1.S1_a_at	4731.3	3561.6	2774.1	1041.9	1019.5	959.1	2670.8	3994.2	2374	1869.9	11.2	0.00757	0.00255863		5029	5586	2036.3	1132	1342	1114.2	2628.6	3965.8	1694.9	869.4	10.4	0.01358	0.00571243		0.881965	10.8		gb:AB056060.1 DB_XREF=gi:13111467 TID=Os.12724.1 CNT=6 FEA=FLmRNA TIER=FL STK=1 UG=Os.12724 UG_TITLE=(japonica cultivar-group) GAD mRNA for glutamate decarboxylase, complete cds, clone:OsGAD1 DEF=Oryza sativa (japonica cultivar-group) GAD mRNA fo	LOC_Os08g36320		unspliced-genomic glutamate decarboxylase, putative, expressed		AT5G17330	0	250090_at
Os.15617.1.S1_a_at	3622.9	3312.3	3025.5	2993	3677.7	3789.1	3204.7	3081.7	2828.9	2835.2	4.4	0.00805	0.00718327		3515.4	2717.5	2560.3	2817.8	2721.7	3075.5	3134.6	3004.9	2795	2648.2	6.8	0.02474	0.0242816		0.501767	5.6		gb:AF464902.1 DB_XREF=gi:18481619 GEN=Dr1 TID=Os.15617.1 CNT=6 FEA=FLmRNA TIER=FL STK=1 UG=Os.15617 DEF=Oryza sativa repressor protein (Dr1) mRNA, complete cds. PROD=repressor protein FL=gb:AK061580.1 gb:AF464902.1 REP_ORG=O. sativa	LOC_Os08g29500	CCAAT-Dr1	unspliced-genomic repressor protein, putative, expressed		AT5G23090	9e-61	249878_at
Os.4639.1.S1_at	326	301	3954.5	5786.6	2236.6	689.2	281.7	559.7	3785.2	6388.9	19.6	0.0005	0.00375647		160.5	387.9	4217.3	5346	1872.8	597.2	173.3	504.1	3788.7	6465.6	19.6	0.00056	0.00296787		0.99615	19.6		gb:AB037416.1 DB_XREF=gi:9453915 TID=Os.4639.1 CNT=6 FEA=FLmRNA TIER=FL STK=1 UG=Os.4639 DEF=Oryza sativa (japonica cultivar-group) mRNA for aspartate carbamoyl transferase, complete cds. PROD=aspartate carbamoyl transferase FL=gb:AB037416.1 gb:	LOC_Os08g15030		unspliced-genomic aspartate carbamoyltransferase 1, chloroplast precursor, putative, expressed		AT3G20330	7e-138	257680_at
Os.49514.1.S1_at	2836.6	1578.8	754.6	554.9	1148.2	1449.6	2718.7	2935.2	1233.8	659.1	8.4	0.00328	0.00226406		3540.6	2899.5	975.3	692.7	1117.9	1864	3256.4	3115.6	932	450.9	8.8	7e-05	0.0017861		0.93244	8.6		gb:L34551.1 DB_XREF=gi:556408 GEN=RITA-1 TID=Os.49514.1 CNT=6 FEA=FLmRNA TIER=FL STK=1 UG=Os.49514 DEF=Oryza sativa transcriptional activator protein (RITA-1) mRNA, complete cds. PROD=transcriptional activator protein FL=gb:L34551.1 gb:AK070674	LOC_Os02g16680	bZIP	unspliced-genomic BZO2H2, putative, expressed		AT5G24800	5e-32	246962_s_at
Os.10387.1.S1_a_at	3907.4	3937.8	6507.2	6959.5	4065.5	3079.1	2898.7	4619.2	5680	5054.7	18	0.00377	0.00731849		3222.8	4419.8	5953.8	5279.8	2947.7	2882	2464.4	4296.2	6542.3	5553.5	16.8	0.00016	0.00226781		0.848892	17.4		gb:AF383877.1 DB_XREF=gi:14495345 TID=Os.10387.1 CNT=5 FEA=FLmRNA TIER=FL STK=1 UG=Os.10387 DEF=Oryza sativa protein phosphatase mRNA, complete cds. PROD=protein phosphatase FL=gb:AF383877.1 REP_ORG=O. sativa	LOC_Os02g57450		unspliced-genomic serine/threonine-protein phosphatase PP1, putative, expressed		AT2G39840	3e-154	245066_at
Os.47874.1.S1_at	343.7	613.4	686.3	450	353.5	411	293.6	515.6	638.3	477.3	15.6	0.00913	0.0144037		306.9	551.7	602.4	411.9	272.5	450.2	257.7	554.9	603.6	299.5	14.4	0.0647	0.0335106		0.897328	15		gb:AK111698.1 DB_XREF=gi:37988361 TID=Os.47874.1 CNT=5 FEA=FLmRNA TIER=FL STK=1 UG=Os.47874 UG_TITLE=(japonica cultivar-group) serinethreonine protein kinase (DPK2) mRNA, complete cds DEF=Oryza sativa (japonica cultivar-group) cDNA clone:J023004I	LOC_Os04g51950		unspliced-genomic serine/threonine protein kinase, putative, expressed		AT2G24360	3e-168	265661_at
Os.185.1.S1_a_at	1754.4	861.2	691.8	782.7	2030.2	5177.7	3644.7	1049.5	666.3	974.5	4	0.00775	0.00668376		2110.5	816	521.6	781.2	2271.4	4184.4	3433.1	963.7	612.9	743.8	4.4	0.00055	0.00204114		0.97789	4.2		gb:L27821.1 DB_XREF=gi:450299 TID=Os.185.1 CNT=4 FEA=FLmRNA TIER=FL STK=1 UG=Os.185 DEF=Oryza sativa protein kinase (OSPK10) mRNA, complete cds. PROD=protein kinase FL=gb:AK121177.1 gb:L27821.1 REP_ORG=O. sativa	LOC_Os06g29810		unspliced-genomic ATP binding protein, putative, expressed		AT4G32300	0	253476_at
Os.8423.1.S1_a_at	898.7	773.1	1046	1626.3	2112.5	2835.6	1385	745.3	1106.8	1611.9	1.2	0.00346	0.00450365		562.1	516.6	778	1371.8	1998.9	2336.8	1040.4	685.9	682	1251	1.2	0.00195	0.00200344		0.980341	1.2		gb:AY434735.1 DB_XREF=gi:38112689 GEN=ETR3 TID=Os.8423.1 CNT=4 FEA=FLmRNA TIER=FL STK=1 UG=Os.8423 DEF=Oryza sativa (indica cultivar-group) putative ethylene receptor (ETR3) mRNA, complete cds. PROD=putative ethylene receptor FL=gb:AF420318.2 g	LOC_Os02g57530	Orphans	unspliced-genomic ethylene receptor, putative, expressed		AT3G23150	2e-158	257922_at
Os.52206.1.S1_at	1709.1	1703	1386.8	1787.5	1927.3	2353.2	2065.3	1514.3	1551.3	1654.3	3.2	0.00468	0.00704939		1722.6	1542.3	1409.4	1793.5	1981.6	2272.1	1808.4	1257.2	1670.8	1547.2	2.4	0.00757	0.0102621		0.898119	2.8		gb:AK065618.1 DB_XREF=gi:32975636 TID=Os.52206.1 CNT=4 FEA=FLmRNA TIER=FL STK=1 UG=Os.52206 UG_TITLE=GPT mRNA for putative glucose-6-phosphatephosphate-tranlocator, complete cds DEF=Oryza sativa (japonica cultivar-group) cDNA clone:J013028M22, fu	LOC_Os05g07670		unspliced-genomic integral membrane protein like, putative, expressed		AT1G06890	2e-133	260818_at
Os.411.1.S1_a_at	840.8	876.7	487.1	1200.6	2718.6	4534.5	1954.3	842.1	522.2	1342.8	2.8	0.00768	0.00651133		849.6	1139.3	593.5	1543.8	3453.3	6095.8	2517.5	617.9	624	1463.3	2.8	0.01087	0.00799228		0.995935	2.8		gb:U25283.1 DB_XREF=gi:1753084 TID=Os.411.1 CNT=4 FEA=FLmRNA TIER=FL STK=1 UG=Os.411 DEF=Oryza sativa clone OSE2 leucine zipper protein mRNA, complete cds. PROD=leucine zipper protein FL=gb:AK067919.1 gb:U25283.1 REP_ORG=O. sativa	LOC_Os01g64730	bZIP	unspliced-genomic G-box-binding factor 4, putative, expressed		AT1G03970	6e-20	265040_at
Os.411.1.S1_at	1129.4	1209.5	863	1387.9	2552.3	5586.5	1833.3	939.7	771.3	1527.6	2.8	0.02964	0.0223047		1459.8	1601.1	797.8	1976.5	3345.9	6729.2	2726.6	955.9	871	1995.6	2.8	0.01308	0.0118891		0.991638	2.8		gb:U25283.1 DB_XREF=gi:1753084 TID=Os.411.1 CNT=4 FEA=FLmRNA TIER=FL STK=1 UG=Os.411 DEF=Oryza sativa clone OSE2 leucine zipper protein mRNA, complete cds. PROD=leucine zipper protein FL=gb:AK067919.1 gb:U25283.1 REP_ORG=O. sativa	LOC_Os01g64730	bZIP	unspliced-genomic G-box-binding factor 4, putative, expressed		AT1G03970	6e-20	265040_at
Os.7457.1.S1_a_at	1765.8	1119.7	1342.2	4814.6	8418.5	9672.5	3276.2	888.3	1321.5	5684.2	1.2	0.00023	0.00165268		861.4	722.1	898.8	5499.6	8659.5	8273.3	2358.2	848	916.5	3362.8	1.2	0.00067	0.00162916		0.964043	1.2		gb:AY238894.1 DB_XREF=gi:29826069 TID=Os.7457.1 CNT=4 FEA=FLmRNA TIER=FL STK=1 UG=Os.7457 DEF=Oryza sativa (indica cultivar-group) adenine phosphoribosyltransferase form 2 mRNA, complete cds. PROD=adenine phosphoribosyltransferase form 2 FL=gb:A	LOC_Os04g42520		unspliced-genomic adenine phosphoribosyltransferase 2, putative, expressed		AT1G80050	6e-71	262039_at
Os.3738.1.S1_s_at	270.8	274	434.7	490	460.1	460.7	381	471.7	434.1	627.4	21.2	0.05457	0.0137236		385.9	379.6	522.7	637.9	614.1	476.8	370.4	426.7	546.6	718.5	21.2	2e-05	0.00406017		0.830678	21.2		gb:AB037899.1 DB_XREF=gi:9188569 GEN=OspolD1 TID=Os.3738.1 CNT=4 FEA=FLmRNA TIER=FL STK=1 UG=Os.3738 DEF=Oryza sativa (japonica cultivar-group) OspolD1 mRNA for OsPol delta large subunit, complete cds. PROD=OsPol delta large subunit FL=gb:AB037	LOC_Os11g08330		unspliced-genomic DNA polymerase delta catalytic subunit, putative, expressed		AT5G63960	0
Os.18226.1.S1_a_at	1948	3177.3	2432.5	977.3	749.6	1133.7	1349.4	2791.1	2690.9	603	12.8	0.0018	0.00544814		2688.7	5040	2459.2	813.2	565.2	1112.9	1252	2685.7	3065.1	947.1	12.4	0.01454	0.00891885		0.925302	12.6		gb:AB095097.1 DB_XREF=gi:33354142 GEN=OsRSH3 TID=Os.18226.1 CNT=4 FEA=FLmRNA TIER=FL STK=1 UG=Os.18226 DEF=Oryza sativa (japonica cultivar-group) OsRSH3 mRNA for plastid (p)ppGpp synthase, complete cds. PROD=plastid (p)ppGpp synthase FL=gb:AB09	LOC_Os09g27050		unspliced-genomic RSH2, putative, expressed		AT3G14050	0	258207_at
Os.18692.1.S1_at	115.6	125.2	51.5	68.6	164.5	236.7	150.5	67.1	50.8	38.7	4.4	0.00419	0.00752245		100.2	71.1	22.3	61.9	42.8	89	74.6	49.4	21.1	52.1	5.6	0.02559	0.0243803		0.608325	5		gb:AK111267.1 DB_XREF=gi:32996476 TID=Os.18692.1 CNT=4 FEA=FLmRNA TIER=FL STK=1 UG=Os.18692 UG_TITLE=(japonica cultivar-group) isolate 20130 putative receptor protein kinase mRNA, complete cds DEF=Oryza sativa (japonica cultivar-group) cDNA clone	LOC_Os02g43290		unspliced-genomic protein kinase APK1A, chloroplast precursor, putative, expressed		AT1G33260	2e-68	256529_at
Os.9835.1.S1_a_at	613.9	504.5	532.9	1060.3	1147.5	1044.6	727.8	597	746.9	1047.2	0	0.00014	0.00141666		623.2	579.8	643	845.4	944.7	997.5	746.9	568.3	734.9	1156.1	0	0.00678	0.00171498		0.892467	0		gb:AB079063.2 DB_XREF=gi:25396401 GEN=UXS-4 TID=Os.9835.1 CNT=3 FEA=FLmRNA TIER=FL STK=1 UG=Os.9835 DEF=Oryza sativa (japonica cultivar-group) UXS-4 mRNA for UDP-glucuronic acid decarboxylase, complete cds. PROD=UDP-glucuronic acid decarboxylase	LOC_Os01g62020		unspliced-genomic UDP-glucuronic acid decarboxylase 1, putative, expressed		AT3G53520	2e-116	251945_at
Os.13010.1.S1_a_at	515.2	232.7	627.6	957.1	974.9	641.4	529.7	386.8	529.9	1155.2	22.8	0.00087	0.00652669		518.6	273	590.8	1223.4	1051.2	527.2	478	373.8	622.4	1213.7	22	0.00098	0.00751202		0.962807	22.4		gb:AB066661.2 DB_XREF=gi:18996332 GEN=OsRFC4 TID=Os.13010.1 CNT=3 FEA=FLmRNA TIER=FL STK=1 UG=Os.13010 DEF=Oryza sativa (japonica cultivar-group) OsRFC4 mRNA for replication factor C 40kDa subunit, complete cds. PROD=replication factor C 40kDa s	LOC_Os04g48060		unspliced-genomic replication factor C subunit 4, putative, expressed		AT1G63160	2e-161	259690_at
Os.47877.1.S1_at	62.4	40.3	77.3	124.3	112.8	100.4	71.7	25.8	21.5	117.5	0	0.00459	0.00614888		39.7	65.2	32.6	78.3	110.2	162.8	82.1	58.2	49	119.6	1.6	0.02997	0.0144638		0.610705	0.8		gb:AB110198.1 DB_XREF=gi:32352193 TID=Os.47877.1 CNT=3 FEA=FLmRNA TIER=FL STK=1 UG=Os.47877 UG_TITLE=(japonica cultivar-group) mRNA for hypothetical protein, complete cds, clone: 23C4AR004 DEF=Oryza sativa (japonica cultivar-group) mRNA for hypot	LOC_Os02g27810		unspliced-genomic RS21-C6 protein, putative, expressed		AT3G25400	1e-34	257956_at
Os.49772.1.S1_s_at	2789	2464.7	1466.7	975.5	1401	1993.5	3593.7	2339.4	845.1	1224.4	8	0.00147	0.0110336		3855.6	2463.5	1806.5	1020.9	1944.4	2526.7	4342.1	2273.3	1487.7	1303.2	7.2	0.00123	0.00738434		0.94377	7.6		gb:AY214337.1 DB_XREF=gi:37787328 TID=Os.49772.1 CNT=3 FEA=FLmRNA TIER=FL STK=1 UG=Os.49772 DEF=Oryza sativa nicotinate phosphoribosyltransferase-like protein mRNA, complete cds. PROD=nicotinate phosphoribosyltransferase-likeprotein FL=gb:AY2143	LOC_Os03g62110		unspliced-genomic nicotinate phosphoribosyltransferase, putative, expressed		AT2G23420	0	267132_at
Os.37616.1.S1_at	1083.1	1065.6	754.8	499.1	337.4	356.1	453.4	1214.8	1553.4	346	13.2	0.02998	0.0189753		1071.4	620.3	1240.3	447.7	319.5	281.6	434.9	1801.3	1958.5	237.3	13.6	0.06368	0.036611		0.895304	13.4		gb:AY077617.1 DB_XREF=gi:21239743 TID=Os.37616.1 CNT=3 FEA=FLmRNA TIER=FL STK=1 UG=Os.37616 DEF=Oryza sativa HSP90-like protein mRNA, complete cds. PROD=HSP90-like protein FL=gb:AY077617.1 REP_ORG=O. sativa	LOC_Os08g39140		unspliced-genomic heat shock protein 81-1, putative, expressed		AT5G56030	0	248045_at
Os.2221.1.S1_a_at	3690.8	2224.7	1616.2	1867.9	2197	2851.2	3529.5	2805.3	2028.1	1419.6	6.8	0.00061	0.00143665		4666.8	2425.7	1768.9	1351.8	2410.1	2827.5	3633.5	2662.9	1988	1477.9	7.2	0.0021	0.00784268		0.947808	7		gb:AF080436.1 DB_XREF=gi:3450841 GEN=MEK1 TID=Os.2221.1 CNT=6 FEA=FLmRNA TIER=FL STK=1 UG=Os.2221 DEF=Oryza sativa mitogen activated protein kinase kinase (MEK1) mRNA, complete cds. PROD=mitogen activated protein kinase kinase FL=gb:AF080436.1	LOC_Os07g38530		unspliced-genomic protein kinase domain containing protein, expressed		AT3G04910	0	259080_at
Os.46627.1.S1_at	361.3	799.7	752	1028.6	453.3	521	465	207.9	1183.8	997.1	18.4	0.04605	0.0303281		213	657.5	744.4	722.7	321.5	367.8	256.6	231.7	1510.2	732.6	17.2	0.0557	0.0428766		0.892963	17.8		gb:AB164463.1 DB_XREF=gi:45126768 GEN=OsGGT TID=Os.46627.1 CNT=4 FEA=FLmRNA TIER=FL STK=1 UG=Os.46627 DEF=Oryza sativa (indica cultivar-group) OsGGT mRNA for putative glycogenin glucosyltransferase, complete cds. PROD=putative glycogenin glucosy	LOC_Os10g40640		unspliced-genomic transferase, transferring glycosyl groups, putative, expressed		AT2G35710	6e-164	265797_at
Os.2213.1.S1_at	237.5	219.4	250.5	402.2	380	450	241.5	250.6	199.3	279.6	0.8	0.01413	0.00560753		244.3	184.2	331.9	479.7	394.1	508.7	269	191.6	396.8	372.6	23.2	0.01935	0.0203553		0.764428	0		gb:AF050675.1 DB_XREF=gi:2961177 TID=Os.2213.1 CNT=4 FEA=FLmRNA TIER=FL STK=1 UG=Os.2213 DEF=Oryza sativa GTP-binding protein mRNA, complete cds. PROD=GTP-binding protein FL=gb:AF050675.1 gb:AK099524.1 REP_ORG=O. sativa	LOC_Os07g42820		unspliced-genomic ARF-related protein, putative, expressed		AT5G52210	1e-77	248346_at
Os.52774.1.S1_at	321.4	379.9	595.2	704.1	708	484.7	222.7	501	542.7	824.3	20.8	0.00045	0.00473127		268.5	592.8	715.5	767.5	726	587.8	324.2	617.6	801.8	1101.6	19.6	0.00327	0.0044222		0.908372	20.2		gb:AB075476.2 DB_XREF=gi:17426124 GEN=ure TID=Os.52774.1 CNT=4 FEA=FLmRNA TIER=FL STK=1 UG=Os.52774 DEF=Oryza sativa (indica cultivar-group) ure mRNA for urease, complete cds. PROD=urease FL=gb:AK069176.1 gb:AB075476.2 REP_ORG=O. sativa			Oryza sativa (indica cultivar-group) ure mRNA for urease, complete cds.
Os.38985.1.S1_at	818.5	303.1	449.7	923.9	715.9	932	900.3	279.3	321.7	799.5	2	0.02257	0.0239109		1098.4	397.8	334	769	916.2	778.7	886.9	302.4	307.3	942	2.4	0.0317	0.0118044		0.872483	2.2		gb:AY341858.1 DB_XREF=gi:33519203 TID=Os.38985.1 CNT=3 FEA=FLmRNA TIER=FL STK=1 UG=Os.38985 DEF=Oryza sativa (japonica cultivar-group) WRKY18 mRNA, complete cds. PROD=WRKY18 FL=gb:AY341858.1 REP_ORG=O. sativa	LOC_Os07g02060	WRKY	unspliced-genomic OsWRKY29 - Superfamily of rice TFs having WRKY and zinc finger domains, expressed		AT1G69310	2e-42	260337_at
Os.50998.1.S1_at	5352.3	6924.3	5004.8	3102.8	3589.2	3763.6	5035.5	6396.5	4660	4059.6	11.6	0.00159	0.00704845		7689.2	8064.1	7212.9	4233.7	4727	4250.5	6127.1	9013.5	5842.5	4521.3	11.6	0.0026	0.00722778		0.931929	11.6		gb:AK060067.1 DB_XREF=gi:32970085 TID=Os.50998.1 CNT=3 FEA=FLmRNA TIER=FL STK=1 UG=Os.50998 UG_TITLE=(japonica cultivar-group) isolate 20132 protein tyrosine phosphatase-like protein mRNA, complete cds DEF=Oryza sativa (japonica cultivar-group) c	LOC_Os08g44320		unspliced-genomic low molecular weight protein-tyrosine-phosphatase slr0328, putative, expressed		AT3G44620	8e-69	252647_at
Os.5439.1.S1_a_at	1247.2	1709.8	3615.9	3195.3	2300.3	1610.2	1426.6	1363.5	2787.4	4796.9	19.6	0.00405	0.0114344		945.4	1673.7	2866.2	3533.7	2657.9	1543.7	1387.2	1869.5	2436.8	4602.5	20	0.001	0.00188908		0.946826	19.8		gb:AB057749.1 DB_XREF=gi:13429991 GEN=PPOX-IProtox-I TID=Os.5439.1 CNT=3 FEA=FLmRNA TIER=FL STK=1 UG=Os.5439 DEF=Oryza sativa (japonica cultivar-group) PPOX-IProtox-I mRNA for protoporphyrinogen oxidase I, complete cds. PROD=protoporphyrinogen o	LOC_Os01g18320		unspliced-genomic protoporphyrinogen oxidase, chloroplast precursor, putative, expressed		AT4G01690	0	255537_at
Os.28010.1.S1_at	371.1	604.9	507.5	406	370.7	287.6	368.7	636.6	544.1	484.8	14.4	0.00423	0.00743287		305.4	573.6	593.3	404	401.3	237.3	235.4	711.2	478	616.7	15.6	0.03481	0.0276883		0.891291	15		gb:AB082381.1 DB_XREF=gi:30060338 GEN=UV-DDB2 TID=Os.28010.1 CNT=5 FEA=FLmRNA TIER=FL STK=1 UG=Os.28010 DEF=Oryza sativa (japonica cultivar-group) UV-DDB2 mRNA for UV-damaged DNA binding protein 2, complete cds. PROD=UV-damaged DNA binding prote	LOC_Os01g04870		unspliced-genomic nucleic acid binding protein, putative, expressed		AT5G58760	0	247779_at
Os.40018.1.S1_at	698.3	3329.1	2781	1286.1	1419.2	798.4	836.8	2976.1	3867.3	704.3	14.4	0.02465	0.0239939		595.6	2619.3	3379.9	1094.2	722	825.6	617.9	1723.4	4878.8	620.1	15.2	0.04459	0.0328717		0.899388	14.8		gb:AY344492.1 DB_XREF=gi:33591113 TID=Os.40018.1 CNT=5 FEA=FLmRNA TIER=FL STK=1 UG=Os.40018 DEF=Oryza sativa (japonica cultivar-group) heat shock factor RHSF10 mRNA, complete cds. PROD=heat shock factor RHSF10 FL=gb:AB050096.1 gb:AY344492.1 gb:A	LOC_Os05g45410	HSF	unspliced-genomic heat shock factor, putative, expressed		AT4G18880	3e-61	254592_at
Os.10175.1.S1_at	38.4	91	119.3	611.3	228.5	416.4	121.1	40.9	157.9	569.1	22.8	0.02373	0.0289404		66.4	35.4	168.8	920.3	300.1	249.5	62.1	6.3	86.6	519.5	22	0.02523	0.020926		0.906988	22.4		gb:D88617.1 DB_XREF=gi:2605616 GEN=Osmyb1 TID=Os.10175.1 CNT=5 FEA=FLmRNA TIER=FL STK=1 UG=Os.10175 DEF=Oryza sativa mRNA for OSMYB1, complete cds. PROD=OSMYB1 FL=gb:AK104053.1 gb:AK066834.1 gb:D88617.1 gb:AK099108.1 REP_ORG=O. sativa	LOC_Os05g35500	MYB	unspliced-genomic mybHv5, putative, expressed		AT4G38620	2e-70	252958_at
Os.11371.1.S1_at	69.1	78.3	221	608.5	193.9	137.6	105.9	122.8	299.6	346.1	20.4	0.01602	0.0284122		46.7	101.4	317.8	534.6	115.9	83.4	127.7	96.2	326.5	259.5	18.8	0.01999	0.026867		0.934204	19.6		gb:AB051108.1 DB_XREF=gi:19071829 GEN=RIP2 TID=Os.11371.1 CNT=5 FEA=FLmRNA TIER=FL STK=1 UG=Os.11371 DEF=Oryza sativa RIP2 mRNA for ribosome inactivating protein 2, complete cds. PROD=ribosome inactivating protein 2 FL=gb:AB051108.1 gb:AK103707	LOC_Os01g06740		unspliced-genomic protein synthesis inhibitor I, putative, expressed
Os.53188.1.S1_at	520	308.7	428.3	1158.3	1606.9	1825.5	709.7	279.6	356.4	784.9	1.2	0.00041	0.00123628		373.2	249.5	179.2	591.3	1203.8	1843.4	579	178	386.3	934.5	1.6	0.00402	0.00543408		0.923983	1.4		gb:AY275180.1 DB_XREF=gi:30526081 GEN=OsZIP3 TID=Os.53188.1 CNT=4 FEA=FLmRNA TIER=FL STK=1 UG=Os.53188 DEF=Oryza sativa (japonica cultivar-group) putative ZIP-like zinc transporter (OsZIP3) mRNA, complete cds. PROD=putative ZIP-like zinc transpo	LOC_Os05g10940		unspliced-genomic zinc transporter 4, chloroplast precursor, putative, expressed		AT1G10970	2e-83	260462_at
Os.4196.1.S1_at	530	794.9	931.6	799.7	720.4	729	435.6	903.6	939.5	803	17.2	0.02718	0.0337014		347	729.2	927.3	766.9	615.6	746.7	439.8	997.6	902.7	642.9	16.4	0.12785	0.0374479		0.923349	16.8		gb:U25430.1 DB_XREF=gi:818848 TID=Os.4196.1 CNT=4 FEA=FLmRNA TIER=FL STK=1 UG=Os.4196 DEF=Oryza sativa nucleotide pyrophosphatase precursor, mRNA, complete cds. PROD=nucleotide pyrophosphatase precursor FL=gb:U25430.1 gb:AK101742.1 REP_ORG=O. s	LOC_Os01g10020		unspliced-genomic ectonucleotide pyrophosphatase/phosphodiesterase 1, putative, expressed		AT4G29680	0	253698_at
Os.34549.1.S1_at	139.8	328.1	170.6	169.3	96.8	120.3	62.8	242.8	221	203.5	14.4	0.07155	0.0324709		116.5	627.4	392	214	155.7	134.4	54.9	414.9	217	77.3	13.6	0.11103	0.0380427		0.806238	14		gb:AY222337.1 DB_XREF=gi:34391900 GEN=bHLH TID=Os.34549.1 CNT=4 FEA=FLmRNA TIER=FL STK=1 UG=Os.34549 DEF=Oryza sativa (japonica cultivar-group) putative transcription factor bHLH (bHLH) mRNA, complete cds. PROD=putative transcription factor bHLH	LOC_Os07g43530	bHLH	unspliced-genomic amelogenin precursor like protein, putative, expressed		AT3G47640	2e-31	252427_at
Os.4573.1.S1_at	11229.1	8159.9	4366.2	2858.7	5122.1	3982.7	10552.5	9196.3	4095.7	3214.5	8.8	0.00345	0.00697126		13849	9336.2	4365.8	2719.7	3672	4263.6	8221.2	9191.1	2943	1711	9.2	0.00504	0.00290198		0.937126	9		gb:AF091458.1 DB_XREF=gi:6175370 GEN=MADS18 TID=Os.4573.1 CNT=4 FEA=FLmRNA TIER=FL STK=1 UG=Os.4573 DEF=Oryza sativa MADS box transcription factor MADS18 (MADS18) mRNA, complete cds. PROD=MADS box transcription factor MADS18 FL=gb:AF091458.1 gb	LOC_Os07g41370	MADS	unspliced-genomic MADS-box transcription factor 18, putative, expressed		AT5G60910	1e-61	247553_at
Os.9775.1.S1_at	13396.3	12148.3	4932	3761	4502.9	3589.4	11128.2	9355.2	5688.5	5860.9	10	0.01455	0.0111625		15444.2	14394.1	6677.6	6228.7	7072.6	4181.6	11048.9	13606.7	4591.6	7107	10	0.05153	0.0485669		0.934478	10		gb:AF402800.1 DB_XREF=gi:15430722 TID=Os.9775.1 CNT=4 FEA=FLmRNA TIER=FL STK=1 UG=Os.9775 DEF=Oryza sativa (japonica cultivar-group) clone RICS12005A putative glutathione S-transferase OsGSTU13 mRNA, complete cds. PROD=putative glutathione S-tran	LOC_Os10g38710		unspliced-genomic glutathione S-transferase GSTU6, putative, expressed		AT1G10360	6e-48	264435_at
Os.18405.1.S1_at	94.5	61.7	214.4	230.6	120.9	66.4	38.7	101.7	133.7	208.4	19.2	0.00389	0.00827946		87.9	81	188.1	200.8	104.7	80.1	75.2	85.5	151.4	209.6	19.2	0.0021	0.00524018		0.960633	19.2		gb:AY438639.1 DB_XREF=gi:40365139 GEN=CenH3 TID=Os.18405.1 CNT=4 FEA=FLmRNA TIER=FL STK=1 UG=Os.18405 DEF=Oryza sativa (japonica cultivar-group) centromeric histone 3 (CenH3) mRNA, complete cds. PROD=centromeric histone 3 FL=gb:AK101975.1 gb:AY	LOC_Os05g41080		unspliced-genomic histone H3, putative, expressed		AT5G10400	1e-26	250433_at
Os.53807.1.S1_at	319.3	376.8	654.2	520.2	498.2	586.3	287.8	405.8	569.7	663.6	20.4	0.02952	0.0265516		220.5	390.7	546.2	423.5	442.5	412.4	296	427.5	385.1	458.5	19.2	0.08375	0.0411536		0.792324	19.8		gb:D87260.1 DB_XREF=gi:2580437 TID=Os.53807.1 CNT=3 FEA=FLmRNA TIER=FL STK=1 UG=Os.53807 DEF=Oryza sativa (japonica cultivar-group) mRNA for PCF1, complete cds. PROD=PCF1 FL=gb:D87260.1 gb:AK100180.1 REP_ORG=O. sativa	LOC_Os04g11830	TCP	unspliced-genomic TCP-domain protein, putative, expressed		AT5G08330	1e-20	246011_at
Os.53807.1.S2_at	42.5	79.7	122.9	138	78.3	47.3	53.4	118.4	103.1	70.7	16.8	0.02621	0.0119855		9.9	131.2	146.4	119.8	99.5	71.5	49.3	110.7	111.5	134	17.6	0.01285	0.0205626		0.714693	17.2		gb:AK100180.1 DB_XREF=gi:32985389 TID=Os.53807.1 CNT=3 FEA=FLmRNA TIER=FL STK=1 UG=Os.53807 UG_TITLE=(japonica cultivar-group) mRNA for PCF1, complete cds DEF=Oryza sativa (japonica cultivar-group) cDNA clone:J023030B07, full insert sequence. FL	LOC_Os04g11830	TCP	unspliced-genomic TCP-domain protein, putative, expressed		AT5G08330	1e-20	246011_at
Os.7185.1.S1_a_at	393	283.8	426.5	610.6	418.6	401.3	390.6	287.5	408.6	464.2	22	0.04882	0.0385319		446.1	274.2	427.6	553.3	582.7	629.2	613.6	318.4	436.2	693.3	0.8	0.01912	0.0128858		0.606044	23.4		gb:AY327045.1 DB_XREF=gi:32966066 TID=Os.7185.1 CNT=3 FEA=FLmRNA TIER=FL STK=1 UG=Os.7185 DEF=Oryza sativa (japonica cultivar-group) disease-resistant protein DS3 mRNA, complete cds. PROD=disease-resistant protein DS3 FL=gb:AY327045.1 REP_ORG=O	LOC_Os10g22484		unspliced-genomic RGH2A, putative, expressed		AT4G12070	5e-63	254858_at
Os.7454.1.S1_a_at	185.3	170	160.1	663.4	658.9	212.1	334.3	235	253.5	919.1	22.4	0.02491	0.0329831		169.7	151.3	289.8	633	389.3	192.6	224.5	153.9	302.5	695.9	21.2	0.00532	0.0136904		0.913526	21.8		gb:AF460181.1 DB_XREF=gi:18252626 GEN=ERS2 TID=Os.7454.1 CNT=3 FEA=FLmRNA TIER=FL STK=1 UG=Os.7454 DEF=Oryza sativa subsp. indica putative ethylene receptor (ERS2) mRNA, complete cds. PROD=putative ethylene receptor FL=gb:AF460181.1 gb:AK111944	LOC_Os05g06320		unspliced-genomic ethylene receptor, putative, expressed		AT1G66340	0	260133_at
Os.26062.1.S1_a_at	998.9	1359.6	785.1	650	709.7	914.1	1082.5	1013.4	875.4	631.6	10	0.00472	0.0161187		1389.2	1307.6	1075.3	766.5	784.5	1047.4	1270.4	1069.8	1127.9	735.4	10	0.00119	0.00317709		0.843037	10		gb:AB091673.1 DB_XREF=gi:29467453 GEN=OsSUT4 TID=Os.26062.1 CNT=3 FEA=FLmRNA TIER=FL STK=1 UG=Os.26062 DEF=Oryza sativa (japonica cultivar-group) OsSUT4 mRNA for sucrose transporter, complete cds. PROD=sucrose transporter FL=gb:AY137242.1 gb:AB	LOC_Os02g58080		unspliced-genomic sucrose transport protein SUC3, putative, expressed		AT2G02860	0	266792_at
Os.28459.1.S1_at	664.8	660.5	1596.4	1497.9	1090.7	879.7	1068.6	464.8	1181.3	1676.1	20.4	0.02364	0.0180426		715.8	474.4	1338.7	1855.5	1531.7	907.8	1298.3	600.1	1335.6	2151.4	21.6	0.00926	0.0160608		0.904341	21		gb:AB095094.1 DB_XREF=gi:32351877 GEN=OsSig2A TID=Os.28459.1 CNT=3 FEA=FLmRNA TIER=FL STK=1 UG=Os.28459 DEF=Oryza sativa (japonica cultivar-group) OsSig2A mRNA for plastid sigma factor 2A, complete cds. PROD=plastid sigma factor 2A FL=gb:AK0660	LOC_Os11g26160	Sigma70-like	unspliced-genomic RNA polymerase sigma factor rpoD, putative, expressed		AT1G08540	4e-99	264781_at
Os.17416.1.S1_at	240.3	1137.1	2996.8	5112.3	4098.2	1187.9	451.5	1393.7	3585.6	3411.9	20.4	0.00015	0.00546243		187.5	643.3	3268.5	4563.5	4270.9	1848.5	551	1093.3	5896	3900.3	20	0.0034	0.0141679		0.915658	20.2		gb:AF543418.1 DB_XREF=gi:23452820 GEN=mfs1 TID=Os.17416.1 CNT=3 FEA=FLmRNA TIER=FL STK=1 UG=Os.17416 DEF=Oryza sativa (japonica cultivar-group) major facilitator superfamily antiporter (mfs1) mRNA, complete cds. PROD=major facilitator superfamil	LOC_Os01g17214		unspliced-genomic carbohydrate transporter/ sugar porter/ transporter, putative, expressed		AT3G43790	4e-139	252707_at
Os.22276.1.S1_a_at	276.4	331.1	1078.5	1141.7	683.4	600.1	286.3	509.2	1160.1	1361.1	19.6	0.00056	0.0035972		157.3	344.1	1067.4	1081.4	755.4	567.9	236	634.5	1101.1	1110.2	19.2	0.00018	0.00439672		0.969082	19.4		gb:AY129829.2 DB_XREF=gi:37179505 TID=Os.22276.1 CNT=3 FEA=FLmRNA TIER=FL STK=1 UG=Os.22276 DEF=Oryza sativa (indica cultivar-group) ADT-36 drought-inducible protein 1OS mRNA, complete cds. PROD=drought-inducible protein 1OS FL=gb:AY129829.2 gb:	LOC_Os01g57630		unspliced-genomic membrane-associated salt-inducible protein like, putative, expressed		AT1G55890	1e-52	260595_at
Os.23384.1.A1_at	323.8	167.4	171.8	251.8	343.8	205.6	258.3	141	112.9	228.3	2.4	0.05941	0.0229418		195.2	77.4	94.1	347.6	348.3	224.9	249.6	155.9	201.9	360.7	0	0.01333	0.0140046		0.574975	1.2		gb:AY341847.1 DB_XREF=gi:33519181 TID=Os.23384.1 CNT=3 FEA=FLmRNA TIER=FL STK=1 UG=Os.23384 DEF=Oryza sativa (japonica cultivar-group) WRKY6 mRNA, complete cds. PROD=WRKY6 FL=gb:AY341847.1 REP_ORG=O. sativa	LOC_Os07g40570	WRKY	unspliced-genomic WRKY transcription factor 3, putative, expressed		AT2G03340	2e-66	265718_at
Os.40015.1.S1_at	547.6	147.8	138.2	123.7	109.5	126.6	394	244.7	206.2	135.6	8.4	0.08952	0.0362185		356	105.7	131.6	114.6	105.5	72.2	283.1	200.2	155.4	78.6	8.8	0.11108	0.037226		0.976843	8.6		gb:AY344495.1 DB_XREF=gi:33591119 TID=Os.40015.1 CNT=3 FEA=FLmRNA TIER=FL STK=1 UG=Os.40015 DEF=Oryza sativa (japonica cultivar-group) heat shock factor RHSF13 mRNA, complete cds. PROD=heat shock factor RHSF13 FL=gb:AK069479.1 gb:AY344495.1 REP	LOC_Os01g43590	HSF	unspliced-genomic heat shock factor protein HSF8, putative, expressed		AT3G24520	3e-43	258139_at
Os.23269.1.S1_s_at	1517.1	1810.3	2337.8	1873.8	1331.6	1580.3	1437	1865.8	2394.8	1576.4	15.6	0.01413	0.0157992		1812.6	2018.3	2417.4	1914.2	1479.8	1625	1514.6	2259.8	2382.5	1883.7	15.2	0.00172	0.00513129		0.925993	15.4		gb:AY570521.1 DB_XREF=gi:45758904 TID=Os.23269.1 CNT=3 FEA=FLmRNA TIER=FL STK=1 UG=Os.23269 DEF=Oryza sativa (japonica cultivar-group) barley B recombinant like protein C mRNA, complete cds. PROD=barley B recombinant like protein C FL=gb:AY57052	LOC_Os10g02620	BBR/BPC	unspliced-genomic GAGA-binding protein, putative, expressed		AT1G14685	4e-46	262848_at
Os.1189.1.S1_at	90.2	103.7	77	586	652.4	453.7	137	155.7	54.5	454.7	0	0.0011	0.00389587		130.6	78.3	74	554.8	691.6	378.9	166.9	127.7	94.5	783.5	23.6	0.0021	0.0214069		0.916015	23.8		gb:AB041838.1 DB_XREF=gi:11094204 GEN=Hd1 TID=Os.1189.1 CNT=3 FEA=FLmRNA TIER=FL STK=1 UG=Os.1189 DEF=Oryza sativa (japonica cultivar-group) mRNA for Hd1, complete cds. PROD=Hd1 FL=gb:AB041838.1 REP_ORG=O. sativa	LOC_Os06g16370	C2C2-CO-like	unspliced-genomic zinc finger protein CONSTANS, putative, expressed		AT3G02380	6e-55	258497_at
OsAffx.30475.1.S1_s_at	5102.4	1036.3	1380.7	2792.7	3117	3449.3	4124.8	1247	1417	1331.6	4.4	0.02268	0.0242942		5185.2	2567	1692.4	1509.9	3595.7	4133.5	3323.3	945.7	1391.6	1750.9	4.4	0.00755	0.00660597		0.844204	4.4		gb:AB037543.1 DB_XREF=gi:6815114 GEN=atpB TID=OsAffx.30475.1 CNT=3 FEA=FLmRNA TIER=FL STK=1 NOTE=sequence(s) not in UniGene DEF=Oryza sativa chloroplast atpB mRNA for ATP synthase beta subunit, complete cds. PROD=ATP synthase beta subunit FL=gb	LOC_Os10g21270		unspliced-genomic ATP synthase beta chain, putative, expressed		ATCG00480	0	245014_at
Os.2369.1.S1_a_at	339.3	750.2	1237.4	1208.2	1222.9	863.3	357.9	1077.4	1444.9	1706.5	19.6	0.00211	0.00380738		185.8	593.1	1262.6	1268.1	1100.5	761	370	1100.3	1133.4	1103.9	19.2	0.00604	0.0184796		0.892687	19.4		gb:AF247165.1 DB_XREF=gi:7407664 TID=Os.2369.1 CNT=3 FEA=FLmRNA TIER=FL STK=1 UG=Os.2369 DEF=Oryza sativa alpha-expansin OsEXPA10 mRNA, complete cds. PROD=alpha-expansin OsEXPA10 FL=gb:AK062225.1 gb:AF247165.1 REP_ORG=O. sativa	LOC_Os04g49420		unspliced-genomic histone H4, putative, expressed		AT5G59690	4e-41	247692_s_at
Os.35681.1.S1_at	10.9	6.1	310.6	4260.8	984	553.5	11.3	47.3	513.2	4312.4	21.2	0.02913	0.0361927		66.3	57.1	462.9	3321.3	686.8	472.7	38.6	14.2	342.2	3785.7	21.2	0.03525	0.034616		0.995536	21.2		gb:AY344493.1 DB_XREF=gi:33591115 TID=Os.35681.1 CNT=3 FEA=FLmRNA TIER=FL STK=1 UG=Os.35681 DEF=Oryza sativa (japonica cultivar-group) heat shock factor RHSF11 mRNA, complete cds. PROD=heat shock factor RHSF11 FL=gb:AK066316.1 gb:AY344493.1 REP	LOC_Os01g53220	HSF	unspliced-genomic heat shock factor protein HSF30, putative, expressed		AT3G24520	4e-45	258139_at
Os.30657.1.S1_at	191.5	625.8	464.9	112.4	134.6	79.3	136.6	346.7	462.6	56	13.6	0.01612	0.013357		138.1	291.3	352.8	49.9	90.7	94.1	132.7	247.6	407.2	34.4	13.6	0.02624	0.0223224		0.90153	13.6		gb:AY341846.1 DB_XREF=gi:33519179 TID=Os.30657.1 CNT=3 FEA=FLmRNA TIER=FL STK=1 UG=Os.30657 DEF=Oryza sativa (japonica cultivar-group) WRKY5 mRNA, complete cds. PROD=WRKY5 FL=gb:AK108522.1 gb:AY341846.1 REP_ORG=O. sativa	LOC_Os01g40260	WRKY	unspliced-genomic OsWRKY77 - Superfamily of rice TFs having WRKY and zinc finger domains, expressed		AT5G26170	8e-30
Os.51307.1.S1_at	66.2	79.7	128.4	117.7	73.1	1.3	48.8	80.1	134.3	19	15.6	0.07548	0.017649		14.5	65.6	66.9	136.1	24.4	19.6	5	1.4	163.6	54.8	18	0.0582	0.0446036		0.662906	16.8		gb:AY305866.1 DB_XREF=gi:32172481 GEN=ZFP17 TID=Os.51307.1 CNT=3 FEA=FLmRNA TIER=FL STK=1 UG=Os.51307 DEF=Oryza sativa (japonica cultivar-group) C2H2 type zinc finger transcription factor ZFP17 (ZFP17) mRNA, complete cds. PROD=C2H2 type zinc fin	LOC_Os11g47630	C2H2	unspliced-genomic zinc finger DNA-binding protein, putative, expressed		AT3G46080	2e-17
Os.10019.1.S1_a_at	2387.3	1626.2	623.2	470.3	410.3	697.3	2681.7	1560.4	678.1	472.4	8.8	0.00368	0.00964239		5521.8	2392.3	860.3	536	651.3	922.1	4482	2377.5	792.1	510.8	8.4	0.01107	0.0112951		0.965655	8.6		gb:AY374514.1 DB_XREF=gi:36956964 GEN=MyoVIIIA2 TID=Os.10019.1 CNT=2 FEA=FLmRNA TIER=FL STK=1 UG=Os.10019 DEF=Oryza sativa (japonica cultivar-group) myosin heavy chain class VIII A2 protein (MyoVIIIA2) mRNA, complete cds. PROD=myosin heavy chain	LOC_Os07g37560		unspliced-genomic myosin-5C, putative, expressed		AT1G50360	0	262461_at
Os.33948.1.S1_at	48.7	1.4	109.6	133.2	81.8	106.9	34.1	30.2	133.1	228.2	21.2	0.0202	0.0288269		3.9	41.3	160.3	92.2	122.5	86.2	32.8	60	71.8	202.3	20.8	0.02334	0.0157896		0.795303	21		gb:AY371047.1 DB_XREF=gi:34558718 TID=Os.33948.1 CNT=2 FEA=FLmRNA TIER=FL STK=1 UG=Os.33948 DEF=Oryza sativa (japonica cultivar-group) Rad21-2 protein mRNA, complete cds. PROD=Rad21-2 protein FL=gb:AY371047.1 gb:AK073406.1 REP_ORG=O. sativa	LOC_Os04g41110		unspliced-genomic N terminus of Rad21 / Rec8 like protein, expressed		AT5G16270	2e-10	246500_at
Os.38421.1.S1_at	1609	2146.9	2810.5	2707.5	532	174	990.4	1931.1	2850	3154.8	16.4	0.00182	0.00215792		2274.8	1658.1	3688.1	3041.6	541.8	300.2	1216.3	2484.7	3390.3	3859.8	16.4	0.01043	0.00843761		0.96039	16.4		gb:AY327041.1 DB_XREF=gi:32966058 TID=Os.38421.1 CNT=2 FEA=FLmRNA TIER=FL STK=1 UG=Os.38421 DEF=Oryza sativa (japonica cultivar-group) receptor-like protein kinase ARK1 mRNA, complete cds. PROD=receptor-like protein kinase ARK1 FL=gb:AY327041.1	LOC_Os01g57560		unspliced-genomic serine/threonine-protein kinase receptor precursor, putative, expressed		AT4G21380	0	254416_at
Os.49765.1.S1_at	434	649	1414.4	704.1	642.3	520.3	488.2	811.2	1268.9	880.4	16.8	0.01376	0.0217178		465.8	773.7	1419.2	863.3	824.1	543.2	525.6	1000.8	1329.9	660.8	16.4	0.0239	0.0137913		0.93295	16.6		gb:AK120923.1 DB_XREF=gi:37990546 TID=Os.49765.1 CNT=2 FEA=FLmRNA TIER=FL STK=1 UG=Os.49765 UG_TITLE=(japonica cultivar-group) cDNA clone:J023035G16, full insert sequence DEF=Oryza sativa (japonica cultivar-group) cDNA clone:J023035G16, full inse	LOC_Os04g45860		unspliced-genomic transposon protein, putative, unclassified, expressed		AT5G53550	0	248276_at
Os.51697.1.S1_at	25.4	62.2	73	77.8	46	44.5	43.5	50.3	54.4	69.5	18	0.0133	0.013205		4.1	13.9	70	69.2	32.6	27.4	27.2	54.5	97.3	88.2	18.4	0.00824	0.00588911		0.659398	18.2		gb:AK063449.1 DB_XREF=gi:32973467 TID=Os.51697.1 CNT=2 FEA=FLmRNA TIER=FL STK=1 UG=Os.51697 UG_TITLE=(japonica cultivar-group) ORC5 mRNA for origin recognition complex 5, complete cds DEF=Oryza sativa (japonica cultivar-group) cDNA clone:001-115-	LOC_Os03g55200		unspliced-genomic origin recognition complex subunit 5, putative, expressed		AT4G29910	2e-103	253703_at
Os.46278.1.S1_a_at	1096.3	1094.4	500.5	387.8	948.8	1158.5	1515.8	1331.6	723.9	722.9	7.2	0.00549	0.0037836		1239.7	1441	1132.3	789.1	1064.5	1569.7	1984	2150.1	1116.7	900.6	8.8	0.02953	0.0129006		0.875415	8		gb:AK111418.1 DB_XREF=gi:32996627 TID=Os.46278.1 CNT=2 FEA=FLmRNA TIER=FL STK=1 UG=Os.46278 UG_TITLE=(japonica cultivar-group) putative CPD photolyase (OSJNAb0015J03.12), mRNA DEF=Oryza sativa (japonica cultivar-group) cDNA clone:002-182-G05, ful	LOC_Os10g08580		unspliced-genomic deoxyribodipyrimidine photo-lyase, putative, expressed		AT1G12370	1e-166	259537_at
Os.35049.1.S1_a_at	1253.6	531.5	503	1951.4	3478.7	2687.6	3940.3	447.4	329.7	1689.2	2.4	0.01545	0.00942878		1944.1	615.9	346.9	2082.9	3865.9	2328.9	5036.4	665.3	286.3	2336.6	2.8	0.05101	0.0275657		0.968789	2.6		gb:AB051297.1 DB_XREF=gi:17025923 GEN=OsNIF4 TID=Os.35049.1 CNT=2 FEA=FLmRNA TIER=FL STK=1 UG=Os.35049 DEF=Oryza sativa OsNIF4 mRNA for bZIP transcription factor, complete cds. PROD=bZIP transcription factor FL=gb:AB051297.1 REP_ORG=O. sativa	LOC_Os01g59350	bZIP	unspliced-genomic transcription factor HBP-1b, putative, expressed		AT5G06950	4e-115	250671_at
Os.2353.1.S1_at	334.4	280.4	243.9	333.7	359	404.2	392.2	306.3	234.3	319.3	3.6	0.00144	0.00338728		406.8	271.5	325.4	387.6	502.3	533	451.5	328.6	330.4	341.1	2.8	0.00047	0.00116491		0.843201	3.2		gb:AF193802.1 DB_XREF=gi:6689915 TID=Os.2353.1 CNT=2 FEA=FLmRNA TIER=FL STK=1 UG=Os.2353 DEF=Oryza sativa zinc finger transcription factor WRKY1 mRNA, complete cds. PROD=zinc finger transcription factor WRKY1 FL=gb:AF193802.1 REP_ORG=O. sativa	LOC_Os03g33012		unspliced-genomic WRKY transcription factor 4, putative, expressed		AT1G13960	2e-82	262613_at
Os.40021.1.S1_a_at	3011.9	4284.9	1279.4	76.6	91.1	124.8	2551.4	5180.4	1331.2	81.3	11.2	0.00206	0.0083939		10352.2	5249.1	1144.1	54.9	123.2	256.2	2635.1	4533.4	1962.1	71	9.6	0.04598	0.0431626		0.726029	10.4		gb:AY344489.1 DB_XREF=gi:33591107 TID=Os.40021.1 CNT=2 FEA=FLmRNA TIER=FL STK=1 UG=Os.40021 DEF=Oryza sativa (japonica cultivar-group) heat shock factor RHSF7 mRNA, complete cds. PROD=heat shock factor RHSF7 FL=gb:AY344489.1 REP_ORG=O. sativa	LOC_Os03g06630	HSF	unspliced-genomic heat shock factor protein 1, putative, expressed		AT3G22830	1e-79	258325_at
Os.49746.1.S1_at	57.3	141	862.4	28733.7	9977.9	2087.5	52.9	221.1	1997.4	25437.5	21.6	0.02135	0.0309104		46.2	148.8	1122.9	24982.9	9118.9	2081.9	127.1	225.5	1699.4	24237.8	21.6	0.01979	0.0278362		0.998533	21.6		gb:AY581256.1 DB_XREF=gi:46371869 TID=Os.49746.1 CNT=2 FEA=FLmRNA TIER=FL STK=1 UG=Os.49746 DEF=Oryza sativa (japonica cultivar-group) induced protein MgI1 mRNA, complete cds. PROD=induced protein MgI1 FL=gb:AY581256.1 REP_ORG=O. sativa	LOC_Os01g74020	G2-like	unspliced-genomic ARR1 protein-like, putative, expressed		AT5G59570	1e-44	252475_s_at
Os.50642.1.S1_at	477.6	1024.1	168.6	71.1	58.7	89.9	372.5	1311	376.9	40.5	11.6	0.0202	0.0242578		729.5	732.4	163.3	13	81.4	98.9	241.2	915.4	249.7	15.4	10.8	0.01394	0.0126682		0.927152	11.2		gb:AY344483.1 DB_XREF=gi:33591095 TID=Os.50642.1 CNT=2 FEA=FLmRNA TIER=FL STK=1 UG=Os.50642 DEF=Oryza sativa (japonica cultivar-group) heat shock factor RHSF1 mRNA, complete cds. PROD=heat shock factor RHSF1 FL=gb:AY344483.1 REP_ORG=O. sativa	LOC_Os04g48030	HSF	unspliced-genomic heat shock factor protein 4, putative, expressed		AT4G11660	1e-40	254878_at
Os.37496.1.S1_at	1254.7	1234.9	1663.9	106.1	13.6	3.3	157.1	634.6	1668.5	30	13.6	0.04294	0.0173347		1467.1	1114.8	1956.8	207.7	15.5	15.8	133.9	652.2	824.7	35.4	13.2	0.11022	0.0176722		0.902739	13.4		gb:AF022738.1 DB_XREF=gi:2570510 TID=Os.37496.1 CNT=2 FEA=FLmRNA TIER=FL STK=1 UG=Os.37496 DEF=Oryza sativa chlorophyll a-b binding protein mRNA, complete cds. PROD=chlorophyll a-b binding protein FL=gb:AF022738.1 REP_ORG=O. sativa	LOC_Os07g37550		unspliced-genomic chlorophyll a-b binding protein of LHCII type III, chloroplast precursor, putative, expressed		AT5G54270	5e-123	248151_at
OsAffx.10756.1.S1_x_at	6081.7	5521.3	1315.8	485.6	1733.2	1917.2	7446.1	6020.9	1446.8	888.5	9.2	0.00143	0.00677564		5948.1	5777.9	1878	599.9	1791.1	1527.3	7207.6	6292.1	1485.5	704.5	9.6	0.00161	0.00778861		0.994235	9.4		gb:AB074005.1 DB_XREF=gi:16902307 GEN=AOX1c TID=OsAffx.10756.1 CNT=2 FEA=FLmRNA TIER=FL STK=1 NOTE=sequence(s) not in UniGene DEF=Oryza sativa (japonica cultivar-group) mitochondrial AOX1c mRNA for alternative oxidase 1c, complete cds. PROD=alte	LOC_Os02g47200		unspliced-genomic transposon protein, putative, unclassified, expressed		AT3G22370	3e-124	258452_at
Os.28038.1.S1_at	178.1	196.1	261.6	156.4	171.3	78.5	124.5	169.4	249.5	229.6	16.4	0.01451	0.00689878		88.4	193.1	177.5	202	203.7	104.8	88.9	199.2	218.3	148.7	17.6	0.04988	0.0311278		0.518229	17		gb:AB095440.1 DB_XREF=gi:30409462 GEN=OsHAP3C TID=Os.28038.1 CNT=2 FEA=FLmRNA TIER=FL STK=1 UG=Os.28038 DEF=Oryza sativa (japonica cultivar-group) OsHAP3C mRNA for HAP3, complete cds. PROD=HAP3 FL=gb:AB095440.1 REP_ORG=O. sativa	LOC_Os05g49780	CCAAT_HAP3	unspliced-genomic nuclear transcription factor Y subunit B-4, putative, expressed		AT2G37060	1e-43
Os.15230.1.S1_at	570	376.4	395.9	33.9	38.2	6.4	246.3	594.4	386.1	10	12	0.00462	0.00627797		340.4	802.9	370.9	3.2	12.1	13.3	17.4	221.6	213.1	20.8	12.4	0.07803	0.0164294		0.613162	12.2		gb:AB062676.1 DB_XREF=gi:17221651 GEN=RFT1 TID=Os.15230.1 CNT=2 FEA=FLmRNA TIER=FL STK=1 UG=Os.15230 DEF=Oryza sativa (japonica cultivar-group) RFT1 mRNA for FT-like protein, complete cds. PROD=FT-like protein FL=gb:AB062676.1 REP_ORG=O. sativ	LOC_Os06g06300		unspliced-genomic OsFTL3 - Rice FT-Like3 homogous to Arabidopsis Flowering Locus T gene, expressed		AT1G65480	9e-74	264638_at
Os.13016.1.S1_a_at	92.1	373.6	2447.5	2259.1	232.6	159.3	59.7	438.3	4035.1	1558.3	17.6	0.0164	0.0270491		35.5	310.3	2556.3	1182.8	136.5	72.9	45.1	245.7	4304.1	1402.8	16.8	0.04499	0.0409307		0.967812	17.2		gb:AF402798.1 DB_XREF=gi:15430718 TID=Os.13016.1 CNT=2 FEA=FLmRNA TIER=FL STK=1 UG=Os.13016 DEF=Oryza sativa (japonica cultivar-group) clone C1756_1A putative glutathione S-transferase OsGSTU11 mRNA, complete cds. PROD=putative glutathione S-tran	LOC_Os07g07320		unspliced-genomic glutathione S-transferase GSTU6, putative, expressed		AT1G10360	2e-33	264435_at
Os.13416.1.S1_at	1330.4	1786.7	1803.5	1903.5	1447.9	1348.8	1028.8	1797.6	2100.5	1573	16.4	0.0082	0.0146475		1012.3	1626.6	2051.2	2003.2	1389.3	1411.7	897.3	1788.5	2533.5	1745.5	17.2	0.00477	0.0128355		0.9414	16.8		gb:AF443602.1 DB_XREF=gi:17149111 TID=Os.13416.1 CNT=2 FEA=FLmRNA TIER=FL STK=1 UG=Os.13416 DEF=Oryza sativa clathrin assembly protein AP19-like protein mRNA, complete cds. PROD=clathrin assembly protein AP19-like protein FL=gb:AF443602.1 REP_O	LOC_Os03g57040		unspliced-genomic AP-1 complex subunit sigma-2, putative, expressed		AT2G17380	1e-80	264847_at
Os.408.1.S1_a_at	668.2	411	694.6	1356.4	2983.7	2731.5	2120.6	446.3	579.5	1571.1	1.6	0.0015	0.00161973		1899.7	308.1	433.8	1983.6	3138.8	4267.1	3040.7	281.8	760.1	2552.1	2.4	0.00025	0.00147889		0.917521	2		gb:AY398581.1 DB_XREF=gi:37655078 GEN=Myb TID=Os.408.1 CNT=2 FEA=FLmRNA TIER=FL STK=1 UG=Os.408 DEF=Oryza sativa (indica cultivar-group) Myb factor protein (Myb) mRNA, complete cds, alternatively spliced. PROD=Myb factor protein FL=gb:AY398581.	LOC_Os01g74410	MYB	unspliced-genomic MYB59, putative, expressed		AT3G46130	4e-31	252534_at
Os.57549.1.S1_s_at	133.6	300.6	496.2	884.6	694.9	363.2	199.5	474	384.8	555.5	20.8	0.01019	0.0121699		49.1	239.8	452.9	534.7	416	478.2	106.5	478.7	402.7	890	20.4	0.03465	0.0186821		0.662163	20.6		gb:AF150080.1 DB_XREF=gi:5107148 GEN=TIM13 TID=Os.57549.1 CNT=2 FEA=FLmRNA TIER=FL STK=1 UG=Os.57549 DEF=Oryza sativa small zinc finger-like protein (TIM13) mRNA, complete cds. PROD=small zinc finger-like protein FL=gb:AF150080.1 REP_ORG=O. sa	LOC_Os02g45820		unspliced-genomic mitochondrial import inner membrane translocase subunit Tim13, putative, expressed		AT1G61570	8e-17	265006_at
Os.46743.3.S1_a_at	295.3	317.7	153	146.1	173.1	108.6	316.5	437.9	174.7	202.7	10.8	0.04882	0.0311918		417.5	487	286.5	190.1	181.6	101.9	263.4	501.9	196.6	159.3	11.6	0.01733	0.0163217		0.856046	11.2		gb:AY374515.1 DB_XREF=gi:36956979 GEN=MyoXIE1 TID=Os.46743.3 CNT=1 FEA=FLmRNA TIER=FL STK=1 UG=Os.46743 DEF=Oryza sativa (japonica cultivar-group) myosin heavy chain class XI E1 protein (MyoXIE1) mRNA, complete cds. PROD=myosin heavy chain class	LOC_Os03g53660		unspliced-genomic XIF, putative, expressed		AT2G31900	0	263470_at
Os.50880.1.S1_a_at	38.5	52	277.6	259	172	127.2	7.4	204.7	352.2	371.4	18.8	0.00291	0.00686523		9.8	196.1	460.6	285.8	233.2	165.1	14.9	199.9	504.4	393.9	18	0.00222	0.00886011		0.912092	18.4		gb:AB096014.1 DB_XREF=gi:30698493 GEN=rpoT1 TID=Os.50880.1 CNT=1 FEA=FLmRNA TIER=FL STK=1 UG=Os.50880 DEF=Oryza sativa (japonica cultivar-group) rpoT1 mRNA for RpoT1, complete cds. PROD=RpoT1 FL=gb:AB096014.1 REP_ORG=O. sativa	LOC_Os09g07120		unspliced-genomic DNA-directed RNA polymerase 1B, mitochondrial precursor, putative, expressed		AT5G15700	0	246514_at
Os.2611.1.S1_a_at	26.1	5.4	37.9	69.4	64.1	21.5	15.2	18.7	64	81.8	21.2	0.00162	0.00842448		22.3	6.6	49.5	76	58.1	31.2	2.7	2.2	29.2	63.2	21.6	0.00027	0.00252082		0.852181	21.4		gb:AY224548.1 DB_XREF=gi:29367647 TID=Os.2611.1 CNT=1 FEA=FLmRNA TIER=FL STK=1 UG=Os.2611 DEF=Oryza sativa (japonica cultivar-group) isolate 24092 putative myosin mRNA, complete cds. PROD=putative myosin FL=gb:AY224548.1 REP_ORG=O. sativa	LOC_Os10g36060		unspliced-genomic chorion family 2 protein, expressed		AT1G63300	2e-150	260113_at
Os.9108.1.S1_a_at	626.3	576.7	363.4	247.5	502.5	523	958.8	542.2	327.1	241.8	7.2	0.00459	0.0118856		1118.1	709.4	344.5	502.9	544	613.4	1019.1	618.7	332.8	379	6.8	0.00572	0.0127796		0.831958	7		gb:AF383878.1 DB_XREF=gi:14495347 TID=Os.9108.1 CNT=1 FEA=FLmRNA TIER=FL STK=1 UG=Os.9108 DEF=Oryza sativa soluble starch synthase II-1 mRNA, complete cds. PROD=soluble starch synthase II-1 FL=gb:AF383878.1 REP_ORG=O. sativa	LOC_Os10g30156		unspliced-genomic soluble starch synthase 2-1, chloroplast precursor, putative, expressed		AT3G01180	0	259277_at
Os.13011.1.S1_at	29.8	1.8	3.7	59	117.6	434	51	7.1	16	38.8	2.8	0.06021	0.0349695		65.5	2.3	4.3	52.1	191.3	383.4	46.3	3.7	3.3	22.8	2.8	0.01299	0.0130359		0.968422	2.8		gb:AB059567.1 DB_XREF=gi:15991217 GEN=OsD305 TID=Os.13011.1 CNT=1 FEA=FLmRNA TIER=FL STK=1 UG=Os.13011 DEF=Oryza sativa mRNA for OsD305, complete cds. PROD=OsD305 FL=gb:AB059567.1 REP_ORG=O. sativa	LOC_Os09g18159		unspliced-genomic light repressible receptor protein kinase, putative, expressed		AT1G51850	2e-116	246366_at
Os.26642.1.S1_a_at	38728	44392.2	30088.5	19742.2	27308.5	30096.3	35958.3	46340.7	33650.7	22514.4	10.4	0.00138	0.00651492		47451.2	45390.6	37603.7	24985.6	29926	28061.6	37690.3	43230	32868.1	24793.9	10.4	0.00265	0.00265922		0.896577	10.4		gb:AY495085.1 DB_XREF=gi:42416978 GEN=GDC TID=Os.26642.1 CNT=1 FEA=FLmRNA TIER=FL STK=1 UG=Os.26642 DEF=Oryza sativa (indica cultivar-group) glycine dehydrogenase P protein (GDC) mRNA, complete cds. PROD=glycine dehydrogenase P protein FL=gb:AY	LOC_Os06g40940		unspliced-genomic glycine dehydrogenase 2, mitochondrial precursor, putative, expressed		AT2G26080	0	266892_at
Os.13018.1.S1_a_at	4076.9	6221.7	2761.1	812.1	1116	1297.1	2342.2	4929.6	2832.8	1135.5	11.6	0.00393	0.00673762		3975.2	4189.5	2467.3	806.5	1053.1	937.2	2383.7	4056	2008.6	940.3	11.2	0.00163	0.0028041		0.959171	11.4		gb:AF395537.1 DB_XREF=gi:15028466 TID=Os.13018.1 CNT=1 FEA=FLmRNA TIER=FL STK=1 UG=Os.13018 DEF=Oryza sativa soluble starch synthase II-2 mRNA, complete cds. PROD=soluble starch synthase II-2 FL=gb:AF395537.1 REP_ORG=O. sativa	LOC_Os02g51070		unspliced-genomic soluble starch synthase 2-2, chloroplast precursor, putative, expressed		AT3G01180	0	259277_at
Os.15221.1.S1_a_at	2874.1	5138.7	5245.7	5440.5	4012.8	3089.5	3049.4	4551.1	4999.3	6546.9	18	0.00202	0.00235389		3029.8	5610.4	5797.2	5847.2	4773.1	3476.9	3501.4	5547.2	6008	7621.2	18	0.00259	0.00196298		0.984278	18		gb:AB055405.1 DB_XREF=gi:16326130 GEN=Os DNAJ TID=Os.15221.1 CNT=1 FEA=FLmRNA TIER=FL STK=1 UG=Os.15221 DEF=Oryza sativa mRNA for DNAJ homologue, complete cds. PROD=DNAJ homologue FL=gb:AB055405.1 REP_ORG=O. sativa	LOC_Os05g26926		unspliced-genomic chaperone protein dnaJ, putative, expressed		AT2G22360	4e-151	264002_at
Os.27716.2.S1_a_at	98.2	591.9	204.5	54.9	31.7	17.8	8.1	662.3	433.5	16.8	13.2	0.0247	0.0234457		95.2	284.5	153.6	83	2.9	7.9	49.1	203.8	311.4	17.2	13.6	0.00636	0.00983485		0.878924	13.4		gb:AK101700.1 DB_XREF=gi:32986909 TID=Os.27716.2 CNT=5 FEA=FLmRNA TIER=FL STK=2 UG=Os.27716 UG_TITLE=(japonica cultivar-group) cDNA clone:J033060E19, full insert sequence DEF=Oryza sativa (japonica cultivar-group) cDNA clone:J033060E19, full inse	LOC_Os08g43334	HSF	unspliced-genomic heat shock factor protein 7, putative, expressed		AT4G11660	6e-52	254878_at
Os.49771.1.S1_at	24.2	70.2	164	318.3	274.3	150.9	27	84.8	172.6	331	21.6	1e-05	0.00144415		6	31.2	158.1	349.7	356.1	204.6	58.2	56.6	110.8	407.1	22.4	3e-05	0.00160046		0.962138	22		gb:AY062182.1 DB_XREF=gi:37542674 GEN=HAP3b TID=Os.49771.1 CNT=1 FEA=FLmRNA TIER=FL STK=1 UG=Os.49771 DEF=Oryza sativa (indica cultivar-group) HAP3-like transcriptional-activator (HAP3b) mRNA, complete cds. PROD=HAP3-like transcriptional-activat	LOC_Os08g07740	CCAAT_HAP3	unspliced-genomic nuclear transcription factor Y subunit B-3, putative, expressed		AT4G14540	3e-44	245592_at
Os.136.1.S1_a_at	938.3	715.6	572.7	982.1	1615.5	1401.8	1147.8	598.4	663.3	812.4	2.4	0.00031	0.00159417		998.6	798.7	740.7	1073.5	1245.8	975.9	1135	622.6	545.1	1125.3	1.6	0.0204	0.020433		0.761656	2		gb:D78609.1 DB_XREF=gi:1122224 TID=Os.136.1 CNT=1 FEA=FLmRNA TIER=FL STK=1 UG=Os.136 DEF=Oryza sativa (japonica cultivar-group) mRNA for bZIP protein, complete cds. PROD=bZIP protein FL=gb:D78609.1 REP_ORG=O. sativa	LOC_Os03g58250	bZIP	unspliced-genomic regulatory protein opaque-2, putative, expressed		AT5G28770	4e-32	245925_at
OsAffx.983.1.S1_at	5.4	12.9	161.8	230.5	94.7	69.2	11.1	41.7	149	174	20	0.00049	0.0055427		18.1	79	120.5	230.8	123.9	79.3	9.9	77.2	178.5	284.7	20	0.0007	0.00283629		0.885454	20		gb:AB099525.1 DB_XREF=gi:47232547 GEN=OsPolL TID=OsAffx.983.1 CNT=1 FEA=FLmRNA TIER=FL STK=1 NOTE=sequence(s) not in UniGene DEF=Oryza sativa (japonica cultivar-group) OsPolL mRNA for DNA polymerase lambda, complete cds. PROD=DNA polymerase lamb	LOC_Os06g13020		unspliced-genomic DNA polymerase lambda, putative, expressed		AT1G10520	7e-180	263257_at
Os.15338.1.S1_a_at	4741.5	2145.4	2890.6	2814	3676.2	3209.9	4073.6	1445.7	2303.9	3232.6	3.2	0.13051	0.0463527		2929.8	918.3	1754	3004.7	3456.6	2631.2	3797	1388.4	1335.3	2319.7	2.4	0.03409	0.0239037		0.795851	2.8		gb:AY151042.1 DB_XREF=gi:24850302 TID=Os.15338.1 CNT=1 FEA=FLmRNA TIER=FL STK=1 UG=Os.15338 DEF=Oryza sativa (japonica cultivar-group) transcription factor MYBS1 mRNA, complete cds. PROD=transcription factor MYBS1 FL=gb:AY151042.1 REP_ORG=O. sa	LOC_Os01g34060	MYB-related	unspliced-genomic DNA binding protein, putative, expressed		AT1G49010	3e-39	260769_at
Os.38982.1.S1_at	1286.2	245.9	469	403	244.5	285.4	1085.4	749.8	544.9	303	8.8	0.1313	0.0446146		939	474.8	322.1	180.8	213.4	124.6	724.2	721.8	383.2	191.8	10	0.01454	0.00932467		0.895973	9.4		gb:AY339378.1 DB_XREF=gi:33440023 TID=Os.38982.1 CNT=1 FEA=FLmRNA TIER=FL STK=1 UG=Os.38982 DEF=Oryza sativa (japonica cultivar-group) Ap25 mRNA, complete cds. PROD=Ap25 FL=gb:AY339378.1 REP_ORG=O. sativa	LOC_Os02g43820	AP2-EREBP	unspliced-genomic AP2 domain containing protein, expressed		AT5G47230	1e-21	248799_at
Os.54277.1.S1_a_at	70.5	47.8	106.8	114.2	49.5	39.3	27.9	53.4	82.3	111	18.4	0.01573	0.0123809		18.6	53.5	179.4	233.7	115.9	64.2	32.3	34.7	95.9	180.4	20	0.00134	0.00198554		0.837345	19.2		gb:AB110983.1 DB_XREF=gi:31339299 GEN=ORC4 TID=Os.54277.1 CNT=1 FEA=FLmRNA TIER=FL STK=1 UG=Os.54277 DEF=Oryza sativa (japonica cultivar-group) ORC4 mRNA for origin recognition complex 4, complete cds. PROD=origin recognition complex 4 FL=gb:AB	LOC_Os01g49010		unspliced-genomic origin recognition complex subunit 4, putative, expressed		AT2G01120	6e-37	262201_at
Os.57426.1.S1_s_at	1591.8	1071.7	770.4	379.7	391.1	379.8	1833.5	1403	1139.3	724.7	10.4	0.01566	0.0077958		1005.3	1561.3	779.4	366	456.2	426.6	1517	2894.9	1485.6	207	11.6	0.01882	0.015587		0.688729	11		gb:AY224438.1 DB_XREF=gi:29367368 TID=Os.57426.1 CNT=1 FEA=FLmRNA TIER=FL STK=1 UG=Os.57426 DEF=Oryza sativa (japonica cultivar-group) isolate 23221 proline-rich protein mRNA, complete cds. PROD=proline-rich protein FL=gb:AY224438.1 REP_ORG=O.	LOC_Os05g13940		unspliced-genomic early nodulin 75 protein, putative, expressed
Os.57426.1.S1_x_at	1856.6	1570.2	1229.4	367.4	396.1	420.3	2155.9	2091.1	1854.6	935.5	11.6	0.00449	0.00280905		971.6	2051.6	759.5	363.3	462.9	425.9	1454.1	3357.2	1903.2	255.7	12	0.02246	0.0272497		0.764341	11.8		gb:AY224438.1 DB_XREF=gi:29367368 TID=Os.57426.1 CNT=1 FEA=FLmRNA TIER=FL STK=1 UG=Os.57426 DEF=Oryza sativa (japonica cultivar-group) isolate 23221 proline-rich protein mRNA, complete cds. PROD=proline-rich protein FL=gb:AY224438.1 REP_ORG=O.	LOC_Os05g13940		unspliced-genomic early nodulin 75 protein, putative, expressed
Os.50637.1.S1_at	205	81.8	94.7	72.7	84.2	231	524.2	84.8	37.5	45.6	6.4	0.06347	0.0394107		228.3	112.1	10.8	24.9	93.2	219.4	338.2	188.9	79.7	36.1	6.8	0.00083	0.00125439		0.852208	6.6		gb:AY345232.1 DB_XREF=gi:33637695 TID=Os.50637.1 CNT=1 FEA=FLmRNA TIER=FL STK=1 UG=Os.50637 DEF=Oryza sativa transcription factor Rap212 mRNA, complete cds. PROD=transcription factor Rap212 FL=gb:AY345232.1 REP_ORG=O. sativa	LOC_Os02g43940	AP2-EREBP	unspliced-genomic transcriptional factor TINY, putative, expressed		AT2G44940	2e-33	266820_at
Os.28062.1.S1_a_at	1428.4	1049.9	870	1040.2	1700.5	1685.6	1929.7	1129.3	816.4	1353.2	3.6	0.00261	0.00527449		2229.4	1364.5	952.9	1686.6	2102.6	2091	2782.7	1346.2	959.2	1666.1	4	0.00597	0.0113771		0.937496	3.8		gb:AY224478.1 DB_XREF=gi:29367482 TID=Os.28062.1 CNT=1 FEA=FLmRNA TIER=FL STK=1 UG=Os.28062 DEF=Oryza sativa (japonica cultivar-group) isolate 29112 phosphate starvation response regulator-like protein mRNA, complete cds. PROD=phosphate starvatio	LOC_Os07g25710	G2-like	unspliced-genomic CDPK substrate protein 1, putative, expressed		AT4G28610	2e-52	253784_at
Os.9765.1.S1_a_at	726.3	752.7	1421.1	1545.3	1456.9	1052.1	878.5	850.5	1340.7	2587.5	20.8	0.00939	0.00997406		670.3	1097.9	1217.3	1836	2004.6	1315.6	1324.1	1517.9	1399.7	3032.9	21.6	0.05059	0.0255747		0.904658	21.2		gb:AY346336.1 DB_XREF=gi:33637780 GEN=RPE1 TID=Os.9765.1 CNT=1 FEA=FLmRNA TIER=FL STK=1 UG=Os.9765 DEF=Oryza sativa RPE1 protein (RPE1) mRNA, complete cds. PROD=RPE1 protein FL=gb:AY346336.1 REP_ORG=O. sativa	LOC_Os03g03470		unspliced-genomic expressed protein		AT5G44600	9e-50
Os.6411.1.S1_a_at	945.7	861.3	594.6	201.9	289.1	272.3	632.6	1220.9	553.2	339	11.2	0.00375	0.00731755		819.3	1029.3	765.8	301.8	261.1	287.7	570.7	1144.2	568.6	313	12	0.001	0.00444321		0.952855	11.6		gb:AB032062.1 DB_XREF=gi:15022419 GEN=OsPAA2 TID=Os.6411.1 CNT=1 FEA=FLmRNA TIER=FL STK=1 UG=Os.6411 DEF=Oryza sativa (japonica cultivar-group) OsPAA2 mRNA for alpha 1-2 subunit of 20S proteasome, complete cds. PROD=alpha 1-2 subunit of 20S prot	LOC_Os07g42260		unspliced-genomic proteasome subunit alpha type 6, putative, expressed		AT2G05840	6e-60	266036_s_at
Os.1314.1.S1_at	1861.3	3921.3	1097.4	444.9	731.9	789.7	1557.4	2369.3	1349	878.4	11.2	0.02638	0.0292798		2720.4	2658.9	1063.3	890.1	1057.8	890	2133.8	1875.7	831.8	807.2	9.6	0.01154	0.0107002		0.796898	10.4		gb:AF010320.1 DB_XREF=gi:2305114 TID=Os.1314.1 CNT=1 FEA=FLmRNA TIER=FL STK=1 UG=Os.1314 DEF=Oryza sativa ferredoxin mRNA, complete cds. PROD=ferredoxin FL=gb:AF010320.1 REP_ORG=O. sativa	LOC_Os08g01380		unspliced-genomic ferredoxin-1, chloroplast precursor, putative, expressed		AT1G60950	8e-27	259727_at
Os.57556.1.S1_x_at	95.2	175.1	746.9	827.1	533.2	398.6	120.1	95.2	450.5	850.7	20.8	0.00047	0.00166359		14.5	132.7	296.5	723.4	456.5	763.7	108.9	61.4	241.9	391.2	23.6	0.02455	0.0111033		0.667475	22.2		gb:AF009411.1 DB_XREF=gi:2267592 TID=Os.57556.1 CNT=1 FEA=FLmRNA TIER=FL STK=1 UG=Os.57556 DEF=Oryza sativa glycine-rich RNA-binding protein mRNA, complete cds. PROD=glycine-rich RNA-binding protein FL=gb:AF009411.1 REP_ORG=O. sativa	LOC_Os12g43600		unspliced-genomic glycine-rich RNA-binding protein 2, putative, expressed		AT2G21660	2e-36	263548_at
Os.148.1.S1_at	589.8	765.7	675.8	363	279.7	310.3	430.1	800.9	732.1	410.1	13.2	0.00011	0.00195838		814.4	1000.8	762.6	622.5	351.6	589.1	472.4	887	803.6	337.5	12.4	0.0174	0.0142503		0.863161	12.8		gb:D10860.1 DB_XREF=gi:287396 TID=Os.148.1 CNT=1 FEA=FLmRNA TIER=FL STK=1 UG=Os.148 UG_TITLE=(japonica cultivar-group) mRNA for chilling tolerance related protein, complete cds, clone:pBC442 DEF=Oryza sativa (japonica cultivar-group) mRNA for chi	LOC_Os05g09550		unspliced-genomic derlin-3, putative, expressed		AT4G29330	1e-92	253712_at
Os.49837.1.S1_a_at	8198.2	6067.2	3658.3	3485.8	4559.4	5630.4	7701.9	6244.2	4042.6	4312.1	7.6	0.0005	0.00413829		9500.5	5618.2	3733.1	3225	5526.7	5784.4	6639.2	6129.9	3826.2	3232.9	7.2	0.00342	0.00568502		0.921284	7.4		gb:AY345223.2 DB_XREF=gi:34864151 TID=Os.49837.1 CNT=1 FEA=FLmRNA TIER=FL STK=1 UG=Os.49837 DEF=Oryza sativa (japonica cultivar-group) transcription factor MADS55 mRNA, complete cds. PROD=transcription factor MADS55 FL=gb:AY345223.2 REP_ORG=O.	LOC_Os06g11330	MADS	unspliced-genomic MADS-box transcription factor 22, putative, expressed		AT2G22540	4e-37	264054_at
Os.2256.1.S1_at	669.5	920.6	798.8	269.1	76.9	76	258.9	1244.4	865.5	529.9	13.6	0.00187	0.00360674		651.5	1337.7	1176.1	419.1	338.1	39.5	527.1	1382.3	1192.8	494.9	13.6	0.00019	0.0020662		0.938359	13.6		gb:AF009959.1 DB_XREF=gi:2305112 TID=Os.2256.1 CNT=1 FEA=FLmRNA TIER=FL STK=1 UG=Os.2256 DEF=Oryza sativa metallothionein-like protein mRNA, complete cds. PROD=metallothionein-like protein FL=gb:AF009959.1 REP_ORG=O. sativa	LOC_Os05g11320		unspliced-genomic metallothionein-like protein type 3, putative, expressed		AT3G15353	6e-17	257054_at
Os.11045.1.S1_s_at	2584.5	2851.8	1190.4	547.1	1169.6	1578.8	2022.4	2863.6	1606.4	625.9	10	0.001	0.00409959		3190.3	3651.8	1684.2	641.7	1242.4	1758.1	2736.4	3300.4	1540.9	665.6	10	0.00018	0.00332163		0.980716	10		gb:AF435817.1 DB_XREF=gi:24637228 TID=Os.11045.1 CNT=1 FEA=FLmRNA TIER=FL STK=1 UG=Os.11045 DEF=Oryza sativa thioredoxin h-like protein mRNA, complete cds. PROD=thioredoxin h-like protein FL=gb:AF435817.1 REP_ORG=O. sativa	LOC_Os05g07690		unspliced-genomic thioredoxin H-type, putative, expressed		AT3G08710	5e-47	258665_at
Os.7424.2.S1_a_at	2148.9	2161.3	3970.2	4863.9	5645.5	5852.6	3385.5	2302.3	3659.9	5396.9	23.6	0.00085	0.0019903		906.5	1260.1	3466.6	4927.2	5036	4467.2	3335.5	1747.2	3529.5	5250.5	22.8	0.00182	0.00110076		0.950671	23.2		gb:AK121674.1 DB_XREF=gi:37991297 TID=Os.7424.2 CNT=18 FEA=FLmRNA TIER=FL+Stack STK=8 UG=Os.7424 UG_TITLE=(japonica cultivar-group) putative transcription factor (OSJNBa0012L23.32), mRNA DEF=Oryza sativa (japonica cultivar-group) cDNA clone:J0330	LOC_Os10g34180		unspliced-genomic transcription factor BTF3, putative, expressed		AT1G73230	1e-57	260095_at
Os.8733.1.S1_at	5710.6	4069.8	7059.3	7251.8	5494.4	6128.5	3978.5	4631.5	6494.9	7553.5	20.8	0.02766	0.035395		5129.2	4610	6448.2	7275.2	5427.3	5383.1	4695.1	4014.2	7559.2	8347.6	20	0.01379	0.023819		0.880851	20.4		gb:AY224469.1 DB_XREF=gi:29367430 TID=Os.8733.1 CNT=112 FEA=FLmRNA TIER=FL+Stack STK=22 UG=Os.8733 DEF=Oryza sativa (japonica cultivar-group) isolate 24733 3-ketoacyl-CoA thiolase-like protein mRNA, complete cds. PROD=3-ketoacyl-CoA thiolase-like	LOC_Os02g57260		unspliced-genomic 3-ketoacyl-CoA thiolase 2, peroxisomal precursor, putative, expressed		AT2G33150	2e-164	245168_at
Os.10132.1.S1_at	4334.4	4686.2	6200.9	6831	6051	5723.3	2577.5	4317	4886	5190	21.2	0.04333	0.0108706		4892.4	4695.1	6212.5	7184.6	6313.6	7510.2	3177.5	4432.2	5855.7	6651.5	22.4	0.02463	0.023914		0.892527	21.8		gb:AY129070.1 DB_XREF=gi:27461707 GEN=Lon1 TID=Os.10132.1 CNT=74 FEA=FLmRNA TIER=FL+Stack STK=21 UG=Os.10132 DEF=Oryza sativa (indica cultivar-group) Lon protease (Lon1) mRNA, complete cds. PROD=Lon protease FL=gb:AK061670.1 gb:AK119169.1 gb:AY	LOC_Os09g36300		unspliced-genomic lon protease homolog 1, mitochondrial precursor, putative, expressed		AT5G47040	0	248818_at
Os.2915.1.S1_at	15441.2	20493.7	2284.2	423.7	1091.4	1645.2	22531.3	17536.3	3216.4	355.2	9.6	0.00289	0.0126253		19239.7	18384.6	3620.4	341.4	588.4	1670.9	25665.4	16457.8	4266.8	148.4	9.6	0.00194	0.00855772		0.98278	9.6		gb:AF323612.1 DB_XREF=gi:13249143 GEN=ZIP TID=Os.2915.1 CNT=41 FEA=FLmRNA TIER=FL+Stack STK=15 UG=Os.2915 DEF=Oryza sativa zinc-induced protein (ZIP) mRNA, complete cds. PROD=zinc-induced protein FL=gb:AF323612.1 REP_ORG=O. sativa	LOC_Os01g21250		unspliced-genomic protein induced upon tuberization, putative, expressed		AT4G02380	2e-09	255479_at
Os.10131.1.S1_a_at	5833	4803.3	1684	1140.4	1590.9	2306.4	2342.9	4204.9	2217.3	1630.8	9.6	0.02629	0.00772152		4790.6	5378.9	1975.4	1251.1	2155.8	2093.1	2984.5	3884.7	2012.4	1657.8	10	0.01753	0.0125014		0.94777	9.8		gb:AB087745.1 DB_XREF=gi:21715989 GEN=OsUGE-1 TID=Os.10131.1 CNT=91 FEA=FLmRNA TIER=FL+Stack STK=13 UG=Os.10131 DEF=Oryza sativa (japonica cultivar-group) OsUGE-1 mRNA for UDP-glucose 4-epimerase, complete cds. PROD=UDP-glucose 4-epimerase FL=g	LOC_Os05g51670		unspliced-genomic UDP-glucose 4-epimerase GEPI48, putative, expressed		AT4G23920	5e-154	254188_at
Os.4416.1.S1_at	664.6	576.6	703.9	2526.8	2833.9	7058.8	781.8	358.8	1253.5	2107.2	1.6	0.04859	0.0328091		381.6	128.6	662.1	4893.5	2866	9005	986.7	265.6	2391.4	1703.9	1.2	0.10709	0.045685		0.959534	1.4		gb:D14000.1 DB_XREF=gi:468491 GEN=lox2osPil TID=Os.4416.1 CNT=42 FEA=FLmRNA TIER=FL+Stack STK=12 UG=Os.4416 DEF=Oryza sativa (japonica cultivar-group) lox2osPil mRNA for lipoxygenase, complete cds. PROD=lipoxygenase FL=gb:D14000.1 REP_ORG=O. s	LOC_Os08g39840		unspliced-genomic lipoxygenase 7, chloroplast precursor, putative, expressed		AT3G45140	0	252618_at
Os.2673.1.S1_at	24859.7	23079.2	19956.8	21700.6	23318	23036.3	25225.8	24768.4	20794.8	18575.9	7.2	0.00895	0.00533563		27232.3	21396.7	20101.2	20570.7	22390.6	23283.9	25458.4	22267.6	20909.3	18240.1	6.4	0.00361	0.00360468		0.862779	6.8		gb:AK062077.1 DB_XREF=gi:32972095 TID=Os.2673.1 CNT=116 FEA=FLmRNA TIER=FL+Stack STK=10 UG=Os.2673 UG_TITLE=Rice mRNA for brain specific protein (S94 gene), complete cds DEF=Oryza sativa (japonica cultivar-group) cDNA clone:001-044-F06, full inse	LOC_Os03g50290		unspliced-genomic 14-3-3-like protein S94, putative, expressed		AT3G02520	7e-122	258489_at
Os.11129.1.S1_at	14321	18480.9	14332.5	4348.8	6954.8	6471.1	10606.9	10353.7	10850.2	5825.5	11.6	0.02136	0.00995536		15652.3	13649.4	9816	4261.8	5965.1	6552.4	10084.3	12237.9	9424.8	4150.9	10.4	0.00187	0.00137766		0.871277	11		gb:AB011416.1 DB_XREF=gi:2920319 TID=Os.11129.1 CNT=65 FEA=FLmRNA TIER=FL+Stack STK=7 UG=Os.11129 DEF=Oryza sativa (indica cultivar-group) mRNA for glutamyl-tRNA reductase, complete cds. PROD=glutamyl-tRNA reductase FL=gb:AB011416.1 gb:AK099393.	LOC_Os10g35840		unspliced-genomic glutamyl-tRNA reductase, chloroplast precursor, putative, expressed		AT1G58290	1e-176	256020_at
Os.13882.1.S1_at	5397.2	4434.2	4083.7	5021.6	5761.3	6626.4	6438.5	4542.1	4142.7	4182.4	4	0.00062	0.00109111		4884.9	3660.7	3481.5	4263.9	4976.2	5536.6	6008.7	3839	3549.6	3580	4.4	0.00183	0.00256951		0.98144	4.2		gb:AK070267.1 DB_XREF=gi:32980291 TID=Os.13882.1 CNT=15 FEA=FLmRNA TIER=FL STK=2 UG=Os.13882 UG_TITLE=(japonica cultivar-group) isolate 20115 ring zinc finger protein-like protein mRNA, complete cds DEF=Oryza sativa (japonica cultivar-group) cDNA	LOC_Os04g48050		unspliced-genomic protein binding protein, putative, expressed		AT1G12760	1e-111
Os.11748.2.S1_a_at	943.6	798.1	904.3	1010.3	1355.6	1434.2	1350.8	1008.9	912	966.9	2.8	0.01156	0.00835078		1570.2	1507.3	1259.9	1477.1	2114.5	2076.3	1869.3	1495.9	1279.5	1535.8	3.2	0.00082	0.00223155		0.907175	3		gb:AK067985.1 DB_XREF=gi:32978003 TID=Os.11748.2 CNT=61 FEA=FLmRNA TIER=FL STK=1 UG=Os.11748 UG_TITLE=(japonica cultivar-group) isolate 23401 sarcoplasmic reticulum protein-like protein mRNA, complete cds DEF=Oryza sativa (japonica cultivar-group	LOC_Os03g62640		unspliced-genomic RNA-binding protein Luc7-like 2, putative, expressed		AT3G03340	1e-133	259055_at
Os.26417.1.S1_at	299	366	242.2	174	256.7	286.9	428.4	425	213.4	244.7	8.8	0.01822	0.016853		518.7	553.3	210.6	208.8	285.6	370.6	410.3	355.8	183.3	189.6	8	0.00731	0.0143303		0.677804	8.4		gb:AY224589.1 DB_XREF=gi:29371982 TID=Os.26417.1 CNT=8 FEA=FLmRNA TIER=FL STK=2 UG=Os.26417 DEF=Oryza sativa (japonica cultivar-group) isolate 31182 E2F dimerization factor mRNA, complete cds. PROD=E2F dimerization factor FL=gb:AY224589.1 REP_O	LOC_Os03g05760	E2F-DP	unspliced-genomic transcription factor Dp-1, putative, expressed		AT5G03415	3e-103	250953_at
Os.773.1.S1_s_at	243.9	483.2	878.6	2092.4	1354.6	1088.7	472.7	337.5	2130.5	1151.5	20.8	0.03047	0.0412929		352.1	253.6	950.4	2193.8	1648.9	957.2	451.1	301.6	2899.2	2417.5	20.4	0.01171	0.018877		0.908458	20.6		gb:AB038597.1 DB_XREF=gi:19909878 GEN=CL-8904 TID=Os.773.1 CNT=8 FEA=FLmRNA TIER=FL STK=2 UG=Os.773 DEF=Oryza sativa CL-8904 mRNA for cytochrome P450, complete cds. PROD=cytochrome P450 FL=gb:AB038597.1 REP_ORG=O. sativa	LOC_Os01g43750		unspliced-genomic cytochrome P450 72A1, putative, expressed		AT3G14690	1e-153	258094_at
Os.46398.1.S1_s_at	28827.4	40154.9	34190.9	27794.9	17976.4	11247.2	20722.4	46118.8	35682.8	29066.1	14	0.0016	0.00434657		26628.5	42704.7	37367.9	27077.6	18275.2	9161.1	17624.9	40749	34124.4	23377	14.4	0.00109	0.0022727		0.963367	14.2		gb:U43530.1 DB_XREF=gi:1815627 GEN=OsMT-2 TID=Os.46398.1 CNT=52 FEA=FLmRNA TIER=FL STK=1 UG=Os.46398 DEF=Oryza sativa metallothionein-like type 2 (OsMT-2) mRNA, complete cds. PROD=metallothionein-like type 2 FL=gb:U43530.1 REP_ORG=O. sativa	LOC_Os01g05650		unspliced-genomic metallothionein-like protein type 2, putative, expressed		AT3G09390	8e-07	259008_at
Os.7974.1.S1_at	50700	49946.3	43221.3	37825.6	26432	22355.6	36061.9	49782	40045.5	39997.7	13.2	0.01546	0.00435259		55331.4	43908.4	46287.8	36606.4	22862.9	18831.5	33097.3	34458.8	37740.6	30459.8	12.8	0.12428	0.0288472		0.847691	13		gb:AK072473.1 DB_XREF=gi:32982496 TID=Os.7974.1 CNT=59 FEA=FLmRNA TIER=FL STK=1 UG=Os.7974 UG_TITLE=(japonica cultivar-group) isolate 23061 chloroplast photosystem I reaction center subunit II precursor-like protein mRNA, complete cds DEF=Oryza s	LOC_Os03g09220		unspliced-genomic expressed protein		AT4G33500	5e-69	253335_at
Os.10281.1.S1_at	5093.2	2950.7	1565.1	879.7	2064.8	3284.8	5530.7	2603.3	1447.5	863.9	7.2	0.00024	0.00387898		5532.3	2710.2	1612.9	1253	2521.1	3045.6	6409.1	2314.9	1321.5	1068.4	6.8	0.00414	0.0122851		0.980782	7		gb:AK069796.1 DB_XREF=gi:32979820 TID=Os.10281.1 CNT=31 FEA=FLmRNA TIER=FL STK=1 UG=Os.10281 UG_TITLE=Putative sulphate transporter (Sultr4-1) mRNA, complete cds DEF=Oryza sativa (japonica cultivar-group) cDNA clone:J023028K03, full insert sequen	LOC_Os09g06499		unspliced-genomic sulfate transporter 4.1, chloroplast precursor, putative, expressed		AT5G13550	0	245855_at
Os.17691.1.S1_at	10344.8	8771.5	4401.3	2637.1	2339.2	2089.7	7057	10737.3	5360.7	2696.7	10.8	0.0025	0.00376248		13129.5	10841.2	5602.5	2587.9	2366.3	1913.1	8380.6	11906.3	6110.9	3132.6	10.8	0.00238	0.00222624		0.993256	10.8		gb:AK065020.1 DB_XREF=gi:32975038 TID=Os.17691.1 CNT=19 FEA=FLmRNA TIER=FL STK=1 UG=Os.17691 UG_TITLE=(japonica cultivar-group) cDNA clone:J013054J20, full insert sequence DEF=Oryza sativa (japonica cultivar-group) cDNA clone:J013001F20, full ins	LOC_Os08g35620		unspliced-genomic RSH2, putative, expressed		AT3G14050	0	258207_at
Os.1309.1.S1_at	3135.3	2497	3155.1	5652.4	5443.6	5982.4	5150.4	2455.5	3010.7	5336	0.8	0.00284	0.0040434		2868.8	2013.3	3342.8	4769.5	4948.5	4487.7	4826.8	2599.1	2908	5240.8	0.4	0.01185	0.0102621		0.945444	0.6		gb:AK065481.1 DB_XREF=gi:32975499 TID=Os.1309.1 CNT=10 FEA=FLmRNA TIER=FL STK=1 UG=Os.1309 UG_TITLE=Integral membrane protein (OsNramp2) mRNA, complete cds DEF=Oryza sativa (japonica cultivar-group) cDNA clone:J013007J10, full insert sequence. F	LOC_Os03g11010		unspliced-genomic metal transporter Nramp3, putative, expressed		AT2G23150	0	267266_at
Os.22612.1.A1_at	5217.5	4818.1	4241.7	4800.8	5482.2	5660.5	5734.1	4038.7	3874.2	5633.4	2.8	0.01459	0.01118		5600.2	5505	4805.4	6084	6517.6	5967.3	7399.5	4607.1	3971	5948.5	2.8	0.07795	0.0442412		0.884548	2.8		gb:AK062624.1 DB_XREF=gi:32972642 TID=Os.22612.1 CNT=9 FEA=FLmRNA TIER=FL STK=1 UG=Os.22612 UG_TITLE=(japonica cultivar-group) isolate 26645 disulfide isomerase-like protein mRNA, complete cds DEF=Oryza sativa (japonica cultivar-group) cDNA clone	LOC_Os02g51850		unspliced-genomic OsAPRL3 - Oryza sativa adenosine 5'-phosphosulfate reductase-like, expressed		AT1G34780	2e-64	262413_at
Os.22907.1.S1_at	1013.2	348.6	913.9	2666.6	2338.6	2027.8	1028.8	337.1	621.6	2369.2	0	0.00016	0.00268637		834.3	339.2	590.2	2446.9	2505.1	1763.9	1474.8	173.6	810.3	3051.4	23.6	0.0017	0.0148178		0.945638	23.8		gb:AK107217.1 DB_XREF=gi:32992426 TID=Os.22907.1 CNT=9 FEA=FLmRNA TIER=FL STK=1 UG=Os.22907 UG_TITLE=(japonica cultivar-group) isolate 23379 putative protein kinase mRNA, complete cds DEF=Oryza sativa (japonica cultivar-group) cDNA clone:002-125-	LOC_Os05g50190		unspliced-genomic ATP binding protein, putative, expressed		AT3G01490	7e-178	259163_at
Os.19823.1.S1_at	1295.2	2586.9	1347.9	285.3	357.4	749	349.8	2385.6	1118.6	315.1	12	0.02411	0.0250572		1176.5	2773.7	1178.9	238.2	325.8	797.8	291	2649.8	1031.8	407.8	12	0.04175	0.0344289		0.992135	12		gb:AY114310.1 DB_XREF=gi:21586450 TID=Os.19823.1 CNT=8 FEA=FLmRNA TIER=FL STK=1 UG=Os.19823 DEF=Oryza sativa (indica cultivar-group) gibberellin 20-oxidase mRNA, complete cds. PROD=gibberellin 20-oxidase FL=gb:AB077025.1 gb:AY114310.1 REP_ORG=O	LOC_Os01g66100		unspliced-genomic gibberellin 20 oxidase 2, putative, expressed		AT4G25420	4e-101	254065_at
Os.15283.1.S1_at	7860.2	10180.9	2103.2	288.2	463.7	672	3722.8	13234.5	4462.4	774.5	11.2	0.00992	0.0132624		10357	12152.2	5460.9	434.2	741.3	754.5	4176.2	15280.9	4682.1	976	11.6	0.00551	0.00959519		0.981822	11.4		gb:AY224471.1 DB_XREF=gi:29367468 TID=Os.15283.1 CNT=4 FEA=FLmRNA TIER=FL STK=1 UG=Os.15283 DEF=Oryza sativa (japonica cultivar-group) isolate 26647 thioredoxin-like protein mRNA, complete cds. PROD=thioredoxin-like protein FL=gb:AY224471.1 REP	LOC_Os04g57310		unspliced-genomic PBng143, putative, expressed		AT5G50100	6e-56	248537_at
Os.26377.1.S1_at	539	733.6	790.3	1520.1	1863.7	4332.3	1080.9	1016.9	758.7	1040.9	2.4	0.08382	0.0352269		255.8	353.4	266	771.6	1250.5	2392.6	748.8	787.1	316.8	639.5	2.4	0.04799	0.0162214		0.977608	2.4		gb:AK065307.1 DB_XREF=gi:32975325 TID=Os.26377.1 CNT=7 FEA=FLmRNA TIER=FL STK=1 UG=Os.26377 UG_TITLE=(japonica cultivar-group) putative arm repeat containing protein (P0031D02.15), mRNA DEF=Oryza sativa (japonica cultivar-group) cDNA clone:J01300	LOC_Os01g60860		unspliced-genomic spotted leaf protein 11, putative, expressed		AT5G01830	3e-107	251061_at
Os.11810.2.S1_a_at	26197.3	28831.8	17700.4	8066.6	5499.4	6868.7	16206.8	34494.6	20030.9	9914.7	12	0.001	0.00332915		28688	31380.5	22628.5	7820.1	5085.4	6507.5	16478.8	31441.3	21051.2	10260.7	12	0.00027	0.00120023		0.978043	12		gb:AK104742.1 DB_XREF=gi:32989951 TID=Os.11810.2 CNT=5 FEA=FLmRNA TIER=FL STK=3 UG=Os.11810 UG_TITLE=(japonica cultivar-group) isolate 29042 fibrillin-like protein mRNA, complete cds DEF=Oryza sativa (japonica cultivar-group) cDNA clone:001-038-E	LOC_Os09g04790		unspliced-genomic plastid-lipid-associated protein 2, chloroplast precursor, putative, expressed		AT4G04020	6e-90	255364_s_at
Os.3440.1.S2_at	5382.2	3192.2	3416.3	3641	4444.3	4488	4591.1	3040.9	3295.2	4008.4	3.6	0.01993	0.0130146		4605.5	2898.3	2477.2	3512.8	4157.6	3674.4	4343.8	2067	2865.3	4677	2.4	0.09385	0.0158948		0.844625	3		gb:AK066506.1 DB_XREF=gi:32976524 TID=Os.3440.1 CNT=45 FEA=FLmRNA TIER=FL STK=0 UG=Os.3440 UG_TITLE=MRNA for 14-3-3-like protein (gf14-e gene) DEF=Oryza sativa (japonica cultivar-group) cDNA clone:J013071A03, full insert sequence. FL=gb:AB100246	LOC_Os02g36974		unspliced-genomic 14-3-3-like protein B, putative, expressed		AT3G02520	1e-121	258489_at
Os.12289.1.S1_at	990.5	1619.2	2232.2	2605.1	2018.1	1647.5	1333.9	2514.6	2430.5	1994.7	18	0.0292	0.0346164		804.9	2006.1	2561.1	2340.1	1773.7	1510	1204.1	2623.6	2565.5	2379.7	17.2	0.00401	0.0207092		0.913278	17.6		gb:AK122158.1 DB_XREF=gi:37991804 TID=Os.12289.1 CNT=23 FEA=FLmRNA TIER=FL STK=0 UG=Os.12289 UG_TITLE=(japonica cultivar-group) cDNA clone:001-014-C06, full insert sequence DEF=Oryza sativa (japonica cultivar-group) cDNA clone:J033147B11, full in	LOC_Os05g47446		unspliced-genomic programmed cell death protein 5, putative, expressed		AT1G29850	1e-37	256001_at
Os.11851.1.S1_at	15141.7	16808.7	5303.6	2355.1	4013.4	4831.3	11738.5	13435.3	6836.8	3371.6	10	0.00129	0.00344946		15232.2	15701.6	6112.2	3668.4	3885.4	4609.2	13328.5	10985.6	7358.8	3129.7	10	0.00123	0.00303211		0.976709	10		gb:AK069202.1 DB_XREF=gi:32979226 TID=Os.11851.1 CNT=27 FEA=FLmRNA TIER=FL STK=0 UG=Os.11851 UG_TITLE=(japonica cultivar-group) cDNA clone:J023140P21, full insert sequence DEF=Oryza sativa (japonica cultivar-group) cDNA clone:J023009G17, full ins	LOC_Os03g11900		unspliced-genomic sugar transport protein 8, putative, expressed		AT5G26340	0	246831_at
Os.6631.1.S1_at	2929.4	2047.9	1818	1879.2	2145.4	2640	2609	2127.4	2023.1	1814.2	6	0.00085	0.00811406		2683.8	1641.1	1538.1	1933.4	2130.1	2690.9	2899.8	2022.9	2044.9	1842.2	5.2	0.00867	0.00701587		0.90226	5.6		gb:AK121020.1 DB_XREF=gi:37990643 TID=Os.6631.1 CNT=21 FEA=FLmRNA TIER=FL STK=0 UG=Os.6631 UG_TITLE=(japonica cultivar-group) isolate 24162 porin-like protein mRNA, complete cds DEF=Oryza sativa (japonica cultivar-group) cDNA clone:J023049E21, fu	LOC_Os03g10510		unspliced-genomic outer mitochondrial membrane protein porin, putative, expressed		AT5G67500	1e-86	247007_at
Os.26362.1.S1_at	4805.5	4528.6	4251.2	6194.9	7037.6	5653.1	6042.4	4634.8	4101.4	5768.2	1.2	0.00884	0.00906104		7398	4158.8	4568.8	5498.3	7322.1	5485.3	6406.9	4248.5	4072.9	6330.3	2.4	0.04723	0.019995		0.700136	1.8		gb:AB110205.1 DB_XREF=gi:32352207 TID=Os.26362.1 CNT=19 FEA=FLmRNA TIER=FL STK=0 UG=Os.26362 UG_TITLE=(japonica cultivar-group) putative nuclear matrix constituent protein 1 (OSJNBb0053G03.10), mRNA DEF=Oryza sativa (japonica cultivar-group) mRNA	LOC_Os01g56140		unspliced-genomic expressed protein		AT5G65770	1e-149	247157_at
Os.27634.1.S1_at	4736	5528.5	5947.3	6412.2	7367.6	6037.6	4363.7	4549.9	4746.4	5805	23.2	0.0202	0.00375783		5486.1	4937.4	6744.7	5834.9	8253.2	5715.8	4623	4070.5	5792.2	6946.1	22.8	0.02209	0.0200832		0.810734	23		gb:AK068874.1 DB_XREF=gi:32978899 TID=Os.27634.1 CNT=14 FEA=FLmRNA TIER=FL STK=0 UG=Os.27634 UG_TITLE=(japonica cultivar-group) SIG6 mRNA for Sig6, complete cds DEF=Oryza sativa (japonica cultivar-group) cDNA clone:J013170C15, full insert sequenc	LOC_Os08g14450	Sigma70-like	unspliced-genomic RNA polymerase sigma factor rpoD1, putative, expressed		AT2G36990	2e-100	263846_at
Os.15967.1.S1_at	870.8	569.1	584.1	934.3	883.5	982.3	844.1	759.8	649.6	764.6	2.4	0.00971	0.0111602		1060.3	807.1	663.1	874.2	1070.4	1109.9	918.1	746.8	753.5	852.4	3.2	0.00013	0.00116271		0.812566	2.8		gb:AY445625.1 DB_XREF=gi:38374123 TID=Os.15967.1 CNT=10 FEA=FLmRNA TIER=FL STK=0 UG=Os.15967 UG_TITLE=(japonica cultivar-group) cDNA clone:J013074J03, full insert sequence DEF=Oryza sativa (japonica cultivar-group) putative protein mRNA, complete	LOC_Os02g54910		unspliced-genomic expressed protein		AT4G30510	2e-85
Os.5492.1.S1_at	986.7	1698.2	3712.2	4657.5	2559.1	2098	705.3	1949.8	3154.5	4659.6	19.6	9e-05	0.00196938		325.8	1068.1	3348.1	3186.3	1646.9	1455.8	393.9	1547.7	3523.3	3532.7	18.8	0.00024	0.00402548		0.934362	19.2		gb:AK103109.1 DB_XREF=gi:32988318 TID=Os.5492.1 CNT=17 FEA=FLmRNA TIER=FL STK=0 UG=Os.5492 UG_TITLE=Cyclophilin 1 (Cyp1) mRNA, complete cds DEF=Oryza sativa (japonica cultivar-group) cDNA clone:J033119A20, full insert sequence. FL=gb:AK103109.1	LOC_Os09g39780		unspliced-genomic peptidyl-prolyl cis-trans isomerase CYP19-3, putative, expressed		AT3G56070	6e-72	251740_at
Os.12834.1.S1_a_at	3126.9	3940	6451.8	7383.3	7149	7741.3	3463.3	4180.8	6963.8	8892.3	21.6	0.00248	0.00642446		1547.7	3354.2	6204.7	7869.7	6540.5	6408.8	3178.4	3746.6	5737.7	8161.7	21.2	0.00055	0.00118867		0.96144	21.4		gb:AK121478.1 DB_XREF=gi:37991101 TID=Os.12834.1 CNT=14 FEA=FLmRNA TIER=FL STK=0 UG=Os.12834 UG_TITLE=(japonica cultivar-group) isolate 20946 putative transcription factor BTF3 mRNA, complete cds DEF=Oryza sativa (japonica cultivar-group) cDNA cl	LOC_Os03g01910		unspliced-genomic transcription factor BTF3, putative, expressed		AT1G73230	4e-65	260095_at
Os.1378.1.S1_at	987.1	1508.3	3236.3	4033.7	2430.7	1981.1	705.5	1856.3	3342.7	4585.3	19.6	8e-05	0.00186932		539.8	1582.9	4454.3	4272.7	3028.3	1934.3	828.1	2385.6	3647.6	4207.7	19.2	5e-05	0.00260043		0.9429	19.4		gb:AK102897.1 DB_XREF=gi:32988106 TID=Os.1378.1 CNT=19 FEA=FLmRNA TIER=FL STK=0 UG=Os.1378 UG_TITLE=DNA-binding protein GBP16 (Rgbp16) mRNA, complete cds DEF=Oryza sativa (japonica cultivar-group) cDNA clone:J033112P14, full insert sequence. FL=	LOC_Os05g28280		unspliced-genomic proliferation-associated protein 2G4, putative, expressed		AT3G51800	3e-150	246307_at
Os.49702.1.S1_at	711.8	862.7	424.2	247.9	271.2	668.8	632.2	1346.9	812.4	391.6	11.2	0.03007	0.0122482		247.2	999.4	314.2	152.4	172.7	418	377.1	1412.5	417.5	168.2	11.6	0.09309	0.0415708		0.895782	11.4		gb:AK120775.1 DB_XREF=gi:37990398 TID=Os.49702.1 CNT=14 FEA=FLmRNA TIER=FL STK=0 UG=Os.49702 UG_TITLE=(japonica cultivar-group) isolate 20145 scarecrow transcriptional regulator-like protein mRNA, complete cds DEF=Oryza sativa (japonica cultivar-	LOC_Os02g45760	GRAS	unspliced-genomic chitin-inducible gibberellin-responsive protein 2, putative, expressed		AT5G52510	6e-77	248366_at
Os.6287.1.S1_at	898.1	791.2	594.6	566.2	659.2	429.1	863.3	839.2	828.4	516.4	10.8	0.05676	0.025532		751.9	796.5	693.8	494.4	485.5	438.1	771.4	907.6	753.5	563.1	12	0.00028	0.00219868		0.839284	11.4		gb:AB110183.1 DB_XREF=gi:32352163 TID=Os.6287.1 CNT=9 FEA=FLmRNA TIER=FL STK=0 UG=Os.6287 UG_TITLE=(japonica cultivar-group) mRNA for hypothetical protein, complete cds, clone: 14FPB010 DEF=Oryza sativa (japonica cultivar-group) mRNA for hypothet	LOC_Os08g14580		unspliced-genomic haloacid dehalogenase-like hydrolase domain-containing protein 1A, putative, expressed		AT4G25840	8e-91	254039_at
Os.4158.1.S1_at	3557.8	2622.8	1164.8	374.5	904.8	984.8	1869.7	2614.5	1193	486.8	9.6	0.00449	0.00239012		4600.3	3379	1342.7	474.4	735.5	1107.6	2015.9	3300.7	1293.1	402.6	10	0.0066	0.0022124		0.994973	9.8		gb:AK069985.1 DB_XREF=gi:32980009 TID=Os.4158.1 CNT=8 FEA=FLmRNA TIER=FL STK=0 UG=Os.4158 UG_TITLE=(japonica cultivar-group) ONIT4 mRNA for nitrilase-like protein, complete cds DEF=Oryza sativa (japonica cultivar-group) cDNA clone:J023038N06, ful	LOC_Os02g42350		unspliced-genomic nitrilase 4, putative, expressed		AT5G22300	4e-144	249942_at
Os.24886.1.S1_at	733.2	714.3	839	835.3	977.5	970.2	885.7	636.5	794.6	797.8	1.2	0.02466	0.0112666		924	765.5	804.2	809.4	992.9	958.3	858.6	717.4	798.1	798.2	2.4	0.0042	0.00531044		0.773569	1.8		gb:AK064456.1 DB_XREF=gi:32974474 TID=Os.24886.1 CNT=6 FEA=FLmRNA TIER=FL STK=0 UG=Os.24886 UG_TITLE=(japonica cultivar-group) putative DNA repair and recombination protein (P0672D08.30), mRNA DEF=Oryza sativa (japonica cultivar-group) cDNA clone	LOC_Os01g01312	SNF2	unspliced-genomic retrotransposon protein, putative, Ty1-copia subclass, expressed		AT2G18760	0	266063_at
Os.46241.1.S1_s_at	9906.7	4731.6	4802.5	7918.5	10087.6	11746.2	14461.2	5054.8	4583.2	5635.5	4	0.00485	0.00651734		9217.6	3850.8	3434.8	6414.3	9142.6	10583.7	12585.2	3742	3614.3	5260.1	4	0.00183	0.00532451		0.993086	4		gb:AY224432.1 DB_XREF=gi:29367356 TID=Os.46241.1 CNT=5 FEA=FLmRNA TIER=FL STK=0 UG=Os.46241 DEF=Oryza sativa (japonica cultivar-group) isolate 20618 DNAJ-like protein mRNA, complete cds. PROD=DNAJ-like protein FL=gb:AY224432.1 REP_ORG=O. sativa	LOC_Os03g44630		unspliced-genomic umecyanin, putative, expressed		AT5G20230	8e-14	246099_at
Os.47761.1.S1_at	52	221.6	207.8	71.6	58.8	99.8	208.5	126.4	193.2	92.3	13.2	0.09646	0.0328924		8.9	196.3	389.4	38.3	13.5	49.7	8.5	31.9	352.1	48.8	15.6	0.07862	0.0434788		0.674482	14.4		gb:AK071556.1 DB_XREF=gi:32981579 TID=Os.47761.1 CNT=5 FEA=FLmRNA TIER=FL STK=0 UG=Os.47761 UG_TITLE=(japonica cultivar-group) glutamate decarboxylase (GAD3) mRNA, complete cds DEF=Oryza sativa (japonica cultivar-group) cDNA clone:J023101A16, ful	LOC_Os03g13300		unspliced-genomic glutamate decarboxylase, putative, expressed		AT5G17330	0	250090_at
Os.7177.1.S1_at	5294	4460.6	4962	7712.4	6579.8	6930.3	5549.7	6151	5898.3	8557.2	22.8	0.03647	0.0252596		5491.7	5101.6	5081.7	8456	7420.8	6723.4	4947.3	6199.2	5271.8	7620.7	23.2	0.01577	0.022342		0.881509	23		gb:BP184460 DB_XREF=gi:32947888 DB_XREF=BP184460 TID=Os.7177.1 CNT=135 FEA=FLmRNA TIER=Stack STK=15 UG=Os.7177 UG_TITLE=EREBP-like protein (tsh1) mRNA, complete cds FL=gb:AK069833.1 gb:AF190770.1 gb:AK060742.1 REP_ORG=O. sativa	LOC_Os06g09390	AP2-EREBP	unspliced-genomic ethylene-responsive element binding protein 1, putative, expressed		AT1G53910	2e-38	262197_at
Os.7102.1.S1_at	1440.5	1310.8	1653.1	2239.6	2116.4	1790.5	1449.7	1628.4	1746.3	2389.8	22	0.00047	0.00448167		1034.6	1181.3	1523.2	2202.8	1967.7	1758	1512.7	1820.1	1923.4	2358	21.2	0.01761	0.00475463		0.912007	21.6		gb:CR279243 DB_XREF=gi:44665809 DB_XREF=CR279243 CLONE=y696f12p3 TID=Os.7102.1 CNT=45 FEA=FLmRNA TIER=Stack STK=11 UG=Os.7102 UG_TITLE=Cysteine synthase (rcs3) mRNA, complete cds FL=gb:AK071279.1 gb:AF073697.1 REP_ORG=O. sativa	LOC_Os03g53650		unspliced-genomic cysteine synthase, putative, expressed		AT4G14880	3e-128	245286_at
Os.2249.1.S1_at	6821.3	6431.1	9859.8	10250.4	10572.2	10457.3	8685.4	6672.9	9421.5	11333.7	22.8	0.00328	0.00553368		4204.5	5088.4	8835.4	10699	9540.6	10337.3	7824.7	6052.4	8887.9	10525	22.4	0.009	0.00318192		0.957503	22.6		gb:AU108761 DB_XREF=gi:10794795 DB_XREF=AU108761 CLONE=C50938 TID=Os.2249.1 CNT=61 FEA=FLmRNA TIER=Stack STK=6 UG=Os.2249 UG_TITLE=S-phase-specific ribosomal protein (RSPSP94) mRNA, complete cds FL=gb:AK099131.1 gb:AF052503.1 gb:AK059647.1 REP	LOC_Os02g18550		unspliced-genomic 40S ribosomal protein S3a, putative, expressed		AT4G34670	8e-111	253248_at
Os.2619.1.S1_at	2536.1	4369.7	3980.2	2827.8	2926.3	2523.1	2284.4	4120.8	4110.3	2907.7	14.8	0.01498	0.0173651		2144.3	3858.5	3310.9	2316.6	2164	2328.1	1753.5	3626.3	4682.8	2390.7	14.8	0.03048	0.0244015		0.923882	14.8		gb:CB656690 DB_XREF=gi:29660415 DB_XREF=OSJNEc11F06.r CLONE=OSJNEc11F06 TID=Os.2619.1 CNT=19 FEA=FLmRNA TIER=Stack STK=6 UG=Os.2619 UG_TITLE=(japonica cultivar-group) Oryza sativa MAP kinase kinase 1 (P0455H0310.27), mRNA FL=gb:AF216314.1 gb:AK	LOC_Os01g32660		unspliced-genomic OsMKK6 - putative MAPKK based on amino acid sequence homology, expressed		AT5G56580	1e-144	247962_at
Os.4726.1.S1_at	2484.6	3619.7	7612.3	8707.5	6201.9	5668.9	2615.3	3632.9	8211.6	8319.9	20	0.00025	0.0040016		1069.5	2471.1	7480.8	8607	5728.1	5852.6	2232	4030.9	7274.1	7806.2	20.4	0.0014	0.00534708		0.977109	20.2		gb:CB966587 DB_XREF=gi:30228697 DB_XREF=NL39_G05 CLONE=NL39_G05 TID=Os.4726.1 CNT=58 FEA=FLmRNA TIER=Stack STK=11 UG=Os.4726 UG_TITLE=MRNA for ribosomal protein S15, complete cds FL=gb:AK059157.1 gb:D10962.1 REP_ORG=O. sativa	LOC_Os07g08660		unspliced-genomic 40S ribosomal protein S15, putative, expressed		AT5G09510	6e-73	245886_at
Os.7860.1.S1_at	8435.7	27996.9	29804.9	32649.6	19573.2	17877.2	4621.7	32383.7	31161	29918.5	17.2	0.00833	0.0186703		3775.1	31679.5	30939.4	26528.9	16498.6	13944.7	3806	28873.1	28765.2	26730.1	16.8	0.00773	0.0149826		0.963892	17		gb:CB666183 DB_XREF=gi:29669908 DB_XREF=OSJNEd12P13.r CLONE=OSJNEd12P13 TID=Os.7860.1 CNT=49 FEA=FLmRNA TIER=Stack STK=7 UG=Os.7860 UG_TITLE=(japonica cultivar-group) mRNA for oryzain gamma, complete cds FL=gb:AK066748.1 gb:D90408.1 REP_ORG=O.	LOC_Os09g27030		unspliced-genomic thiol protease aleurain precursor, putative, expressed		AT5G60360	2e-149	247627_at
Os.11573.2.A2_a_at	59288.2	61156.5	34477.5	11549.2	30367.3	39162.1	55935	60934.9	34466.9	17281.5	9.6	7e-05	0.00261636		61054.7	55735.4	40888.5	20249.8	34928.7	37246.8	53245.5	51544.2	33086	18529.6	9.2	0.0003	0.00225183		0.967436	9.4		gb:CB621753 DB_XREF=gi:29616741 DB_XREF=OSIIEa07N17.r CLONE=OSIIEa07N17 TID=Os.11573.2 CNT=444 FEA=FLmRNA TIER=ConsEnd STK=1 UG=Os.11573 UG_TITLE=OsrcaA1 mRNA for RuBisCO activase large isoform precursor, complete cds FL=gb:U74321.1 gb:AB034748	LOC_Os11g47970		unspliced-genomic ribulose bisphosphate carboxylase/oxygenase activase, chloroplast precursor, putative, expressed		AT2G39730	7e-172	245061_at
Os.11573.5.A1_x_at	52093.9	59409.8	31682.7	9784	30740.4	36199.8	54785.5	56726.6	31815.2	15787.2	9.2	0.00027	0.00479389		55714.3	51649.1	35893.1	15932.8	31382.9	35189	47227.6	45306.5	29724.3	15648.1	9.2	0.00033	0.00225075		0.956802	9.2		gb:CB620769 DB_XREF=gi:29615757 DB_XREF=OSIIEa06D03.r CLONE=OSIIEa06D03 TID=Os.11573.5 CNT=70 FEA=EST TIER=Stack STK=46 UG=Os.11573 UG_TITLE=OsrcaA1 mRNA for RuBisCO activase large isoform precursor, complete cds REP_ORG=O. sativa	LOC_Os11g47970		unspliced-genomic ribulose bisphosphate carboxylase/oxygenase activase, chloroplast precursor, putative, expressed		AT2G39730	7e-172	245061_at
[truncated: 13,074 more rows]

## Sheet: Diurnal-seedling-leaf
	biological replicate1														biological replicate2
[truncated: 6,267 more rows]

## Sheet: Arabidopsis-Diurnal
probe set ID	CC-Peak_time	CC-pValues	AR-qvalue		Average correlation coefficient
244936_at	0.4	0.08958	0.00254815		0.582206
[truncated: 7,934 more rows]
